# Supplementary material for: A novel class of polymorphic toxins in Bacteroidetes
Source: Life Sci Alliance. 2020 Mar 13;3(4):e201900631. doi: 10.26508/lsa.201900631 (PMC7073777; doi:10.26508/lsa.201900631)
Supplement: Supplementary file 1 [file LSA-2019-00631_Supplemental_Data_1.xlsx]

## Sheet: Tanfor_Proteins
SN	Genome_ID	Genome_Name	Genomic_Accession	Start	End	Strand	Protein_Accession	CD	SignalP	Phobius	Length	Operon_Upstream_Protein	CD	SignalP	Phobius	Operon_Upstream_Length	Operon_Upstream_Distance	Operon_Down1_Protein	CD	SignalP	Phobius	Operon_Down1_Length	Operon_Down1_Distance	Operon_Down2_Protein	CD	SignalP	Phobius	Operon_Down2_Length	Operon_Down2_Distance	Domain	Domain_Start	Domain_End	Evalue
1	177	Cellulophaga baltica 4	NZ_ATLG01000013.1	24091	25506	+	WP_029448874.1	27-141: TIGR02542 (T_forsyth_147, TANFOR domain.); 297-375: pfam16656 (Pur_ac_phosph_N, Purple acid Phosphatase, N-terminal domain.)	Neg: SP(Sec/SPI) (Pr: 0.876), Pos: SP(Sec/SPI) (Pr: 0.699)	0 Y n8-16c21/22o	471	WP_029448872.1	35-309: COG3291 (COG3291, PKD repeat [Function unknown].)	Neg: LIPO(Sec/SPII) (Pr: 0.981), Pos: LIPO(Sec/SPII) (Pr: 0.990)	0 Y n8-19c24/25o	455	52	WP_051333182.1		Neg: LIPO(Sec/SPII) (Pr: 0.807), Pos: LIPO(Sec/SPII) (Pr: 0.817)	0 Y n4-15c20/21o	789	154					0	0	TANFOR	27	141	4.93e-11
2	178	Cellulophaga baltica 13	NZ_ATLH01000014.1	29814	31229	+	WP_024480393.1	297-375: pfam16656 (Pur_ac_phosph_N, Purple acid Phosphatase, N-terminal domain.); 27-141: TIGR02542 (T_forsyth_147, TANFOR domain.)	Neg: SP(Sec/SPI) (Pr: 0.864), Pos: SP(Sec/SPI) (Pr: 0.677)	0 Y n8-16c21/22o	471	WP_024480392.1	35-296: COG3291 (COG3291, PKD repeat [Function unknown].)	Neg: LIPO(Sec/SPII) (Pr: 0.975), Pos: LIPO(Sec/SPII) (Pr: 0.973)	0 Y n8-19c24/25o	455	52	WP_024480394.1		Neg: LIPO(Sec/SPII) (Pr: 0.806), Pos: LIPO(Sec/SPII) (Pr: 0.817)	0 Y n4-15c20/21o	789	154					0	0	TANFOR	27	141	1.09e-10
3	179	Cellulophaga baltica 18	NZ_CP009976.1	2974691	2976106	+	WP_029446152.1	27-141: TIGR02542 (T_forsyth_147, TANFOR domain.); 297-375: pfam16656 (Pur_ac_phosph_N, Purple acid Phosphatase, N-terminal domain.)	Neg: SP(Sec/SPI) (Pr: 0.872), Pos: SP(Sec/SPI) (Pr: 0.771)	0 Y n4-15c21/22o	471	WP_029446151.1	35-296: COG3291 (COG3291, PKD repeat [Function unknown].)	Neg: LIPO(Sec/SPII) (Pr: 0.975), Pos: LIPO(Sec/SPII) (Pr: 0.973)	0 Y n8-19c24/25o	455	52	WP_029446153.1		Neg: LIPO(Sec/SPII) (Pr: 0.807), Pos: LIPO(Sec/SPII) (Pr: 0.817)	0 Y n4-15c20/21o	789	153					0	0	TANFOR	27	141	4.65e-11
4	180	Cellulophaga baltica NN016038	NZ_CP009887.1	2953822	2955237	+	WP_025614837.1	27-141: TIGR02542 (T_forsyth_147, TANFOR domain.); 297-375: pfam16656 (Pur_ac_phosph_N, Purple acid Phosphatase, N-terminal domain.)	Neg: SP(Sec/SPI) (Pr: 0.876), Pos: SP(Sec/SPI) (Pr: 0.699)	0 Y n8-16c21/22o	471	WP_025614836.1	35-268: COG3291 (COG3291, PKD repeat [Function unknown].)	Neg: LIPO(Sec/SPII) (Pr: 0.975), Pos: LIPO(Sec/SPII) (Pr: 0.972)	0 Y n8-19c24/25o	455	52	WP_025614838.1		Neg: LIPO(Sec/SPII) (Pr: 0.807), Pos: LIPO(Sec/SPII) (Pr: 0.817)	0 Y n4-15c20/21o	789	154					0	0	TANFOR	27	141	5.07e-11
5	181	Cellulophaga baltica DSM 24729	NZ_FNBD01000019.1	27772	29238	+	WP_074539472.1	314-392: pfam16656 (Pur_ac_phosph_N, Purple acid Phosphatase, N-terminal domain.)	Pos: SP(Sec/SPI) (Pr: 0.552)	0 Y n25-33c38/39o	488	WP_074539471.1	35-286: COG3291 (COG3291, PKD repeat [Function unknown].)	Neg: LIPO(Sec/SPII) (Pr: 0.975), Pos: LIPO(Sec/SPII) (Pr: 0.973)	0 Y n8-19c24/25o	455	1	WP_074539473.1		Neg: LIPO(Sec/SPII) (Pr: 0.807), Pos: LIPO(Sec/SPII) (Pr: 0.817)	0 Y n4-15c20/21o	789	154					0	0	TANFOR	44	158	2.93e-09
6	210	Aquimarina muelleri DSM 19832	NZ_AUML01000031.1	59975	61375	+	WP_081414608.1	26-160: TIGR02542 (T_forsyth_147, TANFOR domain.); 301-370: pfam16656 (Pur_ac_phosph_N, Purple acid Phosphatase, N-terminal domain.)	Pos: SP(Sec/SPI) (Pr: 0.760)	0 Y n5-16c21/22o	466	WP_027413158.1	43-278: COG3291 (COG3291, PKD repeat [Function unknown].)	Neg: LIPO(Sec/SPII) (Pr: 0.845), Pos: LIPO(Sec/SPII) (Pr: 0.618)	0 Y n7-17c21/22o	447	60	WP_081414610.1	540-742: PRK03918 (PRK03918, chromosome segregation protein; Provisional)		0 0 o	754	183					0	0	TANFOR	26	160	5.35e-13
7	322	Aquimarina sp. MAR_2010_214 Mar_2010_214	NZ_PJMS01000001.1	3245570	3251578	+	WP_101448516.1	36-176: TIGR02542 (T_forsyth_147, TANFOR domain.)	Neg: SP(Sec/SPI) (Pr: 0.678), Pos: SP(Sec/SPI) (Pr: 0.770)	0 Y n15-26c31/32o	2002	WP_101448515.1	124-271: COG3291 (COG3291, PKD repeat [Function unknown].)	Neg: LIPO(Sec/SPII) (Pr: 0.993), Pos: LIPO(Sec/SPII) (Pr: 0.951)	0 Y n4-16c21/22o	447	19	WP_101451018.1			0 0 o	750	310	WP_101448517.1	7-145: pfam11695 (DUF3291, Domain of unknown function (DUF3291).)		0 0 o	154	119	TANFOR	36	176	1.08e-14
8	333	Aquimarina megaterium EL33	NZ_FLRG01000001.1	1531004	1536973	-	WP_074406673.1	15-155: TIGR02542 (T_forsyth_147, TANFOR domain.); 283-360: pfam16656 (Pur_ac_phosph_N, Purple acid Phosphatase, N-terminal domain.)		0 Y n2-9c14/15o	1989	WP_074406674.1	44-188: COG3291 (COG3291, PKD repeat [Function unknown].)	Neg: LIPO(Sec/SPII) (Pr: 0.991), Pos: LIPO(Sec/SPII) (Pr: 0.944)	0 Y n4-16c21/22o	447	80	WP_082994787.1			0 0 o	755	310	WP_074406672.1	7-145: pfam11695 (DUF3291, Domain of unknown function (DUF3291).)		0 0 o	154	149	TANFOR	15	155	4.23e-13
9	336	Cellulophaga sp. E6(2014)	NZ_JQCT01000004.1	8695	10161	-	WP_034666163.1	44-158: TIGR02542 (T_forsyth_147, TANFOR domain.); 314-392: pfam16656 (Pur_ac_phosph_N, Purple acid Phosphatase, N-terminal domain.)	Pos: SP(Sec/SPI) (Pr: 0.519)	0 Y n25-33c38/39o	488	WP_034666164.1	35-273: COG3291 (COG3291, PKD repeat [Function unknown].)	Neg: LIPO(Sec/SPII) (Pr: 0.969), Pos: LIPO(Sec/SPII) (Pr: 0.971)	0 Y n8-19c24/25o	455	1	WP_052085110.1		Neg: LIPO(Sec/SPII) (Pr: 0.807), Pos: LIPO(Sec/SPII) (Pr: 0.817)	0 Y n4-15c20/21o	789	154					0	0	TANFOR	44	158	4.17e-11
10	407	Tenacibaculum agarivorans HZ1	NZ_MSMP01000009.1	164352	176531	-	WP_075342029.1	1720-1797: cl28891 (ParB_N_Srx, ParB N-terminal domain and sulfiredoxin protein-related families.); 47-174: TIGR02542 (T_forsyth_147, TANFOR domain.); 2793-2862: cl28891 (ParB_N_Srx, ParB N-terminal domain and sulfiredoxin protein-related families.)		1 0 i21-40o	4059	WP_083629364.1	120-284: COG3291 (COG3291, PKD repeat [Function unknown].)	Neg: LIPO(Sec/SPII) (Pr: 0.987), Pos: LIPO(Sec/SPII) (Pr: 0.935)	0 Y n15-25c33/34o	455	-53	WP_083629362.1		Neg: SP(Sec/SPI) (Pr: 0.800), Pos: SP(Sec/SPI) (Pr: 0.670)	0 Y n8-17c22/23o	801	75	WP_075342028.1	648-719: TIGR04183 (Por_Secre_tail, Por secretion system C-terminal sorting domain.)	Neg: SP(Sec/SPI) (Pr: 0.867), Pos: SP(Sec/SPI) (Pr: 0.751)	0 Y n10-20c25/26o	719	187	TANFOR	47	174	1.39e-11
11	448	Aquimarina sp. AU119 Aquimarina sp. AU119	NZ_OMPF01000036.1	233407	234771	+	WP_109439043.1			0 Y n2-12c16/17o	454	WP_109439042.1	44-260: COG3291 (COG3291, PKD repeat [Function unknown].)	Neg: LIPO(Sec/SPII) (Pr: 0.846), Pos: LIPO(Sec/SPII) (Pr: 0.528)	0 Y n7-17c21/22o	447	155	WP_109439052.1			0 0 o	745	203	WP_109439044.1		Neg: SP(Sec/SPI) (Pr: 0.792), Pos: SP(Sec/SPI) (Pr: 0.625)	0 Y n5-15c20/21o	143	107	TANFOR	14	139	2.59e-10
12	502	Tenacibaculum sp. M341	NZ_SJXJ01000012.1	20883	29531	+	WP_132724374.1		Neg: SP(Sec/SPI) (Pr: 0.636), Pos: SP(Sec/SPI) (Pr: 0.663)	0 Y n29-36c40/41o	2882	WP_132724373.1	56-279: COG3291 (COG3291, PKD repeat [Function unknown].)	Neg: LIPO(Sec/SPII) (Pr: 0.978), Pos: LIPO(Sec/SPII) (Pr: 0.984)	0 Y n7-16c21/22o	454	-53	WP_132724457.1		Neg: SP(Sec/SPI) (Pr: 0.996), Pos: SP(Sec/SPI) (Pr: 0.916)	0 Y n4-14c18/19o	797	54					0	0	TANFOR	45	180	2.01e-09
13	502	Tenacibaculum sp. M341	NZ_SJXJ01000028.1	21648	32624	-	WP_132727097.1	1729-1790: cl28891 (ParB_N_Srx, ParB N-terminal domain and sulfiredoxin protein-related families.); 29-162: TIGR02542 (T_forsyth_147, TANFOR domain.); 3470-3652: cl00173 (VIP2, N/A.); 2642-2718: cl28891 (ParB_N_Srx, ParB N-terminal domain and sulfiredoxin protein-related families.)	Neg: SP(Sec/SPI) (Pr: 0.641), Pos: SP(Sec/SPI) (Pr: 0.646)	0 Y n10-20c24/25o	3658	WP_132727099.1	115-277: COG3291 (COG3291, PKD repeat [Function unknown].)	Neg: LIPO(Sec/SPII) (Pr: 0.992), Pos: LIPO(Sec/SPII) (Pr: 0.957)	0 Y n6-16c21/22o	450	1	WP_132727094.1		Neg: SP(Sec/SPI) (Pr: 0.518), Pos: SP(Sec/SPI) (Pr: 0.521)	0 Y n7-17c22/23o	798	38					0	0	TANFOR	29	162	2.08e-11
14	195	Tenacibaculum mesophilum HMG1	NZ_LDOD01000008.1	64705	69414	-	WP_047789797.1	1451-1547: pfam14412 (AHH, A nuclease family of the HNH/ENDO VII superfamily with conserved AHH.); 293-359: cd00063 (FN3, Fibronectin type 3 domain; One of three types of internal repeats found in the plasma protein fibronectin.)	Neg: SP(Sec/SPI) (Pr: 0.832), Pos: SP(Sec/SPI) (Pr: 0.646)	0 Y n13-23c27/28o	1569	WP_047789798.1	35-110: cd00146 (PKD, polycystic kidney disease I (PKD) domain; similar to other cell-surface modules, with an IG-like fold; domain probably functions as a ligand binding site in protein-protein or protein-carbohydrate interactions; a single instance of the repeat is presented here.); 117-266: COG3291 (COG3291, PKD repeat [Function unknown].)	Neg: LIPO(Sec/SPII) (Pr: 0.997), Pos: LIPO(Sec/SPII) (Pr: 0.995)	0 Y n10-18c23/24o	454	1	WP_047789796.1			0 0 o	223	2	WP_047789795.1			0 0 o	187	-7	TANFOR	32	154	8.54e-08
15	247	Flavobacterium anhuiense RCM74	NZ_JUIV01000010.1	69354	74537	+	WP_129747692.1	287-377: cd00063 (FN3, Fibronectin type 3 domain; One of three types of internal repeats found in the plasma protein fibronectin.); 1608-1702: pfam14412 (AHH, A nuclease family of the HNH/ENDO VII superfamily with conserved AHH.); 28-161: TIGR02542 (T_forsyth_147, TANFOR domain.)	Neg: SP(Sec/SPI) (Pr: 0.759), Pos: SP(Sec/SPI) (Pr: 0.538)	0 Y n10-17c25/26o	1727	WP_129747691.1	1376-1411: pfam13573 (SprB, SprB repeat.); 1624-1700: TIGR04183 (Por_Secre_tail, Por secretion system C-terminal sorting domain.); 353-389: pfam13573 (SprB, SprB repeat.); 1000-1028: pfam13573 (SprB, SprB repeat.)	Neg: SP(Sec/SPI) (Pr: 0.927), Pos: SP(Sec/SPI) (Pr: 0.651)	0 Y n4-15c20/21o	1700	3	WP_129747693.1			0 0 o	229	4	WP_129747694.1			0 0 o	346	140	TANFOR	28	161	1.31e-12
16	210	Aquimarina muelleri DSM 19832	NZ_AUML01000025.1	66713	68878	-	WP_035087931.1	15-149: TIGR02542 (T_forsyth_147, TANFOR domain.); 283-360: pfam16656 (Pur_ac_phosph_N, Purple acid Phosphatase, N-terminal domain.)		0 0 o	721	WP_027412807.1	125-265: COG3291 (COG3291, PKD repeat [Function unknown].)	Neg: LIPO(Sec/SPII) (Pr: 0.995), Pos: LIPO(Sec/SPII) (Pr: 0.949)	0 Y n4-14c18/19o	450	87	WP_027412805.1			0 0 o	98	6	WP_027412804.1			0 0 o	123	4886	TANFOR	15	149	1.88e-14
17	260	Aquimarina spongiae DSM 22623	NZ_FQYP01000001.1	242896	245091	+	WP_084549347.1	27-161: TIGR02542 (T_forsyth_147, TANFOR domain.); 302-352: cl21522 (FN3, N/A.)	Neg: SP(Sec/SPI) (Pr: 0.994), Pos: SP(Sec/SPI) (Pr: 0.979)	0 Y n6-17c22/23o	731	WP_073312693.1	124-269: COG3291 (COG3291, PKD repeat [Function unknown].)	Neg: LIPO(Sec/SPII) (Pr: 0.992), Pos: LIPO(Sec/SPII) (Pr: 0.954)	0 Y n7-17c21/22o	449	37	WP_073312697.1			0 0 o	146	-1	WP_073312698.1		Neg: SP(Sec/SPI) (Pr: 0.948), Pos: SP(Sec/SPI) (Pr: 0.933)	0 Y n16-27c31/32o	1592	27	TANFOR	27	161	1.3e-13
18	448	Aquimarina sp. AU119 Aquimarina sp. AU119	NZ_OMPF01000022.1	649938	652175	-	WP_109437774.1	40-174: TIGR02542 (T_forsyth_147, TANFOR domain.); 315-365: cl21522 (FN3, N/A.)	Neg: SP(Sec/SPI) (Pr: 0.882), Pos: SP(Sec/SPI) (Pr: 0.945)	0 Y n20-30c35/36o	745	WP_109437775.1	57-262: TIGR00864 (PCC, polycystin cation channel protein.)	Neg: LIPO(Sec/SPII) (Pr: 0.994), Pos: LIPO(Sec/SPII) (Pr: 0.979)	0 Y n6-15c19/20o	449	9	WP_109437773.1			0 0 o	146	6	WP_109437772.1			0 0 o	1633	99	TANFOR	40	174	4.22e-15
19	539	Aquimarina algiphila M91	NZ_VLNR01000057.1	8831	11068	-	WP_143917952.1	40-174: TIGR02542 (T_forsyth_147, TANFOR domain.); 315-365: cl21522 (FN3, N/A.)	Neg: SP(Sec/SPI) (Pr: 0.882), Pos: SP(Sec/SPI) (Pr: 0.945)	0 Y n20-30c35/36o	745	WP_143917953.1	57-262: TIGR00864 (PCC, polycystin cation channel protein.)	Neg: LIPO(Sec/SPII) (Pr: 0.994), Pos: LIPO(Sec/SPII) (Pr: 0.979)	0 Y n6-15c19/20o	449	9	WP_143917951.1			0 0 o	146	6	WP_143917950.1		Neg: SP(Sec/SPI) (Pr: 0.989), Pos: SP(Sec/SPI) (Pr: 0.913)	0 Y n4-15c20/21o	1383	66	TANFOR	40	174	4.38e-15
20	69	Capnocytophaga sputigena H6490	NZ_NIBW01000002.1	830982	836663	+	WP_096089040.1		Neg: SP(Sec/SPI) (Pr: 0.824), Pos: SP(Sec/SPI) (Pr: 0.730)	0 Y n3-14c19/20o	1893	WP_096089417.1	515-550: pfam13573 (SprB, SprB repeat.); 840-914: TIGR04183 (Por_Secre_tail, Por secretion system C-terminal sorting domain.)		0 0 o	916	5	WP_123862246.1			0 0 o	176	2	WP_096089042.1		Neg: SP(Sec/SPI) (Pr: 0.860), Pos: SP(Sec/SPI) (Pr: 0.536)	0 Y n7-17c22/23o	364	-14	TANFOR	25	149	2.59e-09
21	287	Chryseobacterium sp. CH1	NZ_NRQS01000002.1	337827	343112	+	WP_129056423.1		Pos: SP(Sec/SPI) (Pr: 0.705)	0 Y n19-30c37/38o	1761					0	43	WP_129056425.1			0 0 o	186	-10	WP_129056427.1			0 0 o	185	9	TANFOR	48	179	1.29e-10
22	288	Chryseobacterium sp. CH25	NZ_NRQT01000001.1	496234	501519	-	WP_129056423.1		Pos: SP(Sec/SPI) (Pr: 0.705)	0 Y n19-30c37/38o	1761					0	43	WP_129059622.1			0 0 o	171	-10	WP_129056427.1			0 0 o	185	53	TANFOR	48	179	1.29e-10
23	318	Aquimarina sp. Aq349 Aquimarina sp. strain Aq349	NZ_OMKB01000020.1	31897	35073	+	WP_108809308.1	28-160: TIGR02542 (T_forsyth_147, TANFOR domain.)	Neg: SP(Sec/SPI) (Pr: 0.855), Pos: SP(Sec/SPI) (Pr: 0.618)	0 Y n8-18c23/24o	1058	WP_108809307.1			0 0 o	1062	159	WP_108809309.1			0 0 o	341	34					0	253	TANFOR	28	160	9.82e-12
24	319	Aquimarina sp. Aq349 Aquimarina sp. Aq3491	NZ_UYXD01000059.1	2143	5319	-	WP_108809308.1	28-160: TIGR02542 (T_forsyth_147, TANFOR domain.)	Neg: SP(Sec/SPI) (Pr: 0.855), Pos: SP(Sec/SPI) (Pr: 0.618)	0 Y n8-18c23/24o	1058	WP_132066141.1		Neg: LIPO(Sec/SPII) (Pr: 0.753), Pos: LIPO(Sec/SPII) (Pr: 0.719)	1 0 i7-27o	1081	159	WP_108809309.1			0 0 o	341	34					0	253	TANFOR	28	160	9.82e-12
25	333	Aquimarina megaterium EL33	NZ_FLRG01000015.1	2323	5490	-	WP_074410426.1		Neg: SP(Sec/SPI) (Pr: 0.780), Pos: SP(Sec/SPI) (Pr: 0.519)	0 Y n8-18c23/24o	1055	WP_074410427.1			0 0 o	861	197	WP_074410425.1			0 0 o	341	34					0	253	TANFOR	26	158	9.2e-09
26	397	Aquimarina sp. AU58 Aquimarina_sp_AU58	NZ_OMPD01000014.1	2499109	2502228	+	WP_109852769.1	18-150: TIGR02542 (T_forsyth_147, TANFOR domain.)		0 Y n2-8c13/14o	1039	WP_109852768.1		Neg: LIPO(Sec/SPII) (Pr: 0.608), Pos: LIPO(Sec/SPII) (Pr: 0.636)	0 Y n7-18c23/24o	1083	189	WP_109852770.1			1 0 o20-42i	341	34	WP_109852771.1		Neg: SP(Sec/SPI) (Pr: 0.746), Pos: SP(Sec/SPI) (Pr: 0.729)	0 Y n20-31c36/37o	813	106	TANFOR	18	150	4.46e-11
27	318	Aquimarina sp. Aq349 Aquimarina sp. strain Aq349	NZ_OMKB01000020.1	12955	15141	+	WP_074410431.1	32-164: TIGR02542 (T_forsyth_147, TANFOR domain.)	Neg: SP(Sec/SPI) (Pr: 0.466), Pos: SP(Sec/SPI) (Pr: 0.452)	0 Y n12-22c27/28o	728	WP_108809303.1	61-278: TIGR00864 (PCC, polycystin cation channel protein.)	Neg: LIPO(Sec/SPII) (Pr: 0.995), Pos: LIPO(Sec/SPII) (Pr: 0.982)	0 Y n10-20c25/26o	454	60	WP_108809304.1		Neg: SP(Sec/SPI) (Pr: 0.992), Pos: SP(Sec/SPI) (Pr: 0.993)	0 Y n10-21c27/28o	2180	127	WP_108809305.1		Neg: SP(Sec/SPI) (Pr: 0.783), Pos: SP(Sec/SPI) (Pr: 0.749)	0 Y n9-20c24/25o	1185	50	TANFOR	32	164	1.26e-11
28	319	Aquimarina sp. Aq349 Aquimarina sp. Aq3491	NZ_UYXD01000059.1	22075	24240	-	WP_132066145.1	25-157: TIGR02542 (T_forsyth_147, TANFOR domain.)		0 Y n5-15c20/21o	721	WP_132066147.1	58-275: TIGR00864 (PCC, polycystin cation channel protein.)	Neg: LIPO(Sec/SPII) (Pr: 0.993), Pos: LIPO(Sec/SPII) (Pr: 0.959)	0 Y n7-17c22/23o	451	81	WP_108809304.1		Neg: SP(Sec/SPI) (Pr: 0.992), Pos: SP(Sec/SPI) (Pr: 0.993)	0 Y n10-21c27/28o	2180	127	WP_108809305.1		Neg: SP(Sec/SPI) (Pr: 0.783), Pos: SP(Sec/SPI) (Pr: 0.749)	0 Y n9-20c24/25o	1185	50	TANFOR	25	157	1.43e-11
29	333	Aquimarina megaterium EL33	NZ_FLRG01000015.1	20764	22950	-	WP_074410431.1	32-164: TIGR02542 (T_forsyth_147, TANFOR domain.)	Neg: SP(Sec/SPI) (Pr: 0.466), Pos: SP(Sec/SPI) (Pr: 0.452)	0 Y n12-22c27/28o	728	WP_074410432.1	43-109: cd00146 (PKD, polycystic kidney disease I (PKD) domain; similar to other cell-surface modules, with an IG-like fold; domain probably functions as a ligand binding site in protein-protein or protein-carbohydrate interactions; a single instance of the repeat is presented here.); 59-265: TIGR00864 (PCC, polycystin cation channel protein.)	Neg: LIPO(Sec/SPII) (Pr: 0.997), Pos: LIPO(Sec/SPII) (Pr: 0.992)	0 Y n8-17c21/22o	454	60	WP_074410430.1		Neg: SP(Sec/SPI) (Pr: 0.992), Pos: SP(Sec/SPI) (Pr: 0.994)	0 Y n10-21c27/28o	2182	127	WP_074410429.1		Neg: SP(Sec/SPI) (Pr: 0.921), Pos: SP(Sec/SPI) (Pr: 0.974)	0 Y n20-29c34/35o	771	101	TANFOR	32	164	1.26e-11
30	397	Aquimarina sp. AU58 Aquimarina_sp_AU58	NZ_OMPD01000014.1	2479735	2481921	+	WP_109852764.1	32-164: TIGR02542 (T_forsyth_147, TANFOR domain.)	Neg: SP(Sec/SPI) (Pr: 0.401), Pos: SP(Sec/SPI) (Pr: 0.453)	0 Y n12-22c27/28o	728	WP_109852763.1	59-279: TIGR00864 (PCC, polycystin cation channel protein.)	Neg: LIPO(Sec/SPII) (Pr: 0.997), Pos: LIPO(Sec/SPII) (Pr: 0.992)	0 Y n8-17c21/22o	454	59	WP_109852765.1		Neg: SP(Sec/SPI) (Pr: 0.992), Pos: SP(Sec/SPI) (Pr: 0.994)	0 Y n10-21c27/28o	2179	127	WP_109852766.1		Neg: SP(Sec/SPI) (Pr: 0.729), Pos: SP(Sec/SPI) (Pr: 0.603)	0 Y n9-20c24/25o	1186	50	TANFOR	32	164	3.39e-12
31	233	Flavobacterium hercynium DSM 18292	NZ_MUGW01000011.1	19005	20453	-	WP_089048854.1		Neg: SP(Sec/SPI) (Pr: 0.635), Pos: SP(Sec/SPI) (Pr: 0.822)	0 Y n8-19c28/29o	482	WP_089048855.1	792-827: pfam13573 (SprB, SprB repeat.); 1039-1114: TIGR04183 (Por_Secre_tail, Por secretion system C-terminal sorting domain.); 716-750: pfam13573 (SprB, SprB repeat.)	Neg: SP(Sec/SPI) (Pr: 0.849), Pos: SP(Sec/SPI) (Pr: 0.866)	0 Y n4-14c18/19o	1115	2	WP_123868214.1	112-276: COG3291 (COG3291, PKD repeat [Function unknown].)	Neg: LIPO(Sec/SPII) (Pr: 0.994), Pos: LIPO(Sec/SPII) (Pr: 0.950)	0 Y n4-13c18/19o	447	187	WP_089048889.1		Neg: SP(Sec/SPI) (Pr: 0.992), Pos: SP(Sec/SPI) (Pr: 0.985)	0 Y n6-17c23/24o	564	16	TANFOR	42	161	2.03e-10
32	431	Flavobacterium sp. IR1	NZ_NQOT01000408.1	169017	170465	-	WP_095382516.1		Neg: SP(Sec/SPI) (Pr: 0.533), Pos: SP(Sec/SPI) (Pr: 0.579)	1 0 i7-27o	482	WP_095382517.1	778-811: pfam13573 (SprB, SprB repeat.); 1025-1100: TIGR04183 (Por_Secre_tail, Por secretion system C-terminal sorting domain.)	Neg: SP(Sec/SPI) (Pr: 0.873), Pos: SP(Sec/SPI) (Pr: 0.822)	0 Y n4-14c18/19o	1101	2	WP_095382515.1	118-367: COG3291 (COG3291, PKD repeat [Function unknown].)	Neg: LIPO(Sec/SPII) (Pr: 0.994), Pos: LIPO(Sec/SPII) (Pr: 0.949)	0 Y n4-13c18/19o	447	186					0	13	TANFOR	33	157	5.93e-10
33	296	Flavobacterium araucananum DSM 24704	NZ_MUGS01000051.1	17451	22607	-	WP_123875937.1	33-166: TIGR02542 (T_forsyth_147, TANFOR domain.)	Neg: SP(Sec/SPI) (Pr: 0.887), Pos: SP(Sec/SPI) (Pr: 0.973)	0 Y n8-19c28/29o	1718	WP_089481128.1	1382-1418: pfam13573 (SprB, SprB repeat.); 1631-1706: TIGR04183 (Por_Secre_tail, Por secretion system C-terminal sorting domain.); 1007-1035: pfam13573 (SprB, SprB repeat.)	Neg: SP(Sec/SPI) (Pr: 0.910), Pos: SP(Sec/SPI) (Pr: 0.540)	0 Y n4-15c20/21o	1707	4	WP_089481126.1			0 0 o	164	-17	WP_089481125.1			0 0 o	124	295	TANFOR	33	166	4.4e-13
34	297	Flavobacterium araucananum DSM 24704	NZ_QGGJ01000001.1	1661253	1666373	+	WP_109746157.1	21-154: TIGR02542 (T_forsyth_147, TANFOR domain.)	Neg: SP(Sec/SPI) (Pr: 0.506)	0 Y n4-11c16/17o	1706	WP_089481128.1	1382-1418: pfam13573 (SprB, SprB repeat.); 1631-1706: TIGR04183 (Por_Secre_tail, Por secretion system C-terminal sorting domain.); 1007-1035: pfam13573 (SprB, SprB repeat.)	Neg: SP(Sec/SPI) (Pr: 0.910), Pos: SP(Sec/SPI) (Pr: 0.540)	0 Y n4-15c20/21o	1707	40	WP_089481126.1			0 0 o	164	-17	WP_089481125.1			0 0 o	124	295	TANFOR	21	154	4.46e-13
35	212	Tenacibaculum lutimaris DSM 16505	NZ_RAQM01000009.1	305269	308493	-	WP_120187121.1	468-605: COG3064 (TolA, Membrane protein involved in colicin uptake [Cell wall/membrane/envelope biogenesis].); 293-359: cd00063 (FN3, Fibronectin type 3 domain; One of three types of internal repeats found in the plasma protein fibronectin.)	Neg: SP(Sec/SPI) (Pr: 0.839), Pos: SP(Sec/SPI) (Pr: 0.681)	0 Y n13-23c27/28o	1074	WP_120187122.1	117-357: COG3291 (COG3291, PKD repeat [Function unknown].); 35-110: cd00146 (PKD, polycystic kidney disease I (PKD) domain; similar to other cell-surface modules, with an IG-like fold; domain probably functions as a ligand binding site in protein-protein or protein-carbohydrate interactions; a single instance of the repeat is presented here.)	Neg: LIPO(Sec/SPII) (Pr: 0.996), Pos: LIPO(Sec/SPII) (Pr: 0.986)	0 Y n10-18c23/24o	454	1	WP_120187120.1			0 0 i	147	2	WP_120187119.1			0 0 i	134	50	TANFOR	32	154	6.22e-08
36	404	Cellulophaga sp. W5C	NZ_MDDP01000004.1	262805	269542	+	WP_077399997.1		Neg: SP(Sec/SPI) (Pr: 0.840), Pos: SP(Sec/SPI) (Pr: 0.933)	0 Y n21-32c39/40o	2245	WP_077399994.1	120-279: COG3291 (COG3291, PKD repeat [Function unknown].)	Neg: LIPO(Sec/SPII) (Pr: 0.996), Pos: LIPO(Sec/SPII) (Pr: 0.991)	1 0 i7-23o	455	1	WP_077400001.1			0 0 o	144	-1					0	102	TANFOR	49	177	1.54e-09
37	227	Flavobacterium aquidurense RC62	NZ_JRLF01000010.1	185137	190251	-	WP_082421259.1	286-352: cd00063 (FN3, Fibronectin type 3 domain; One of three types of internal repeats found in the plasma protein fibronectin.); 27-160: TIGR02542 (T_forsyth_147, TANFOR domain.)	Neg: SP(Sec/SPI) (Pr: 0.611), Pos: SP(Sec/SPI) (Pr: 0.520)	0 Y n8-19c24/25o	1704	WP_082421260.1	1391-1427: pfam13573 (SprB, SprB repeat.); 1011-1045: pfam13573 (SprB, SprB repeat.); 1639-1714: TIGR04183 (Por_Secre_tail, Por secretion system C-terminal sorting domain.); 1316-1352: pfam13573 (SprB, SprB repeat.)	Neg: SP(Sec/SPI) (Pr: 0.995), Pos: SP(Sec/SPI) (Pr: 0.980)	0 Y n4-15c20/21o	1715	4	WP_055094799.1			0 0 o	175	-10	WP_055094797.1		Neg: LIPO(Sec/SPII) (Pr: 0.852), Pos: LIPO(Sec/SPII) (Pr: 0.811)	0 Y n14-25c30/31o	285	-26	TANFOR	27	160	3.35e-12
38	516	Flavobacterium sp. ZT3R18	NZ_VJZS01000008.1	7846	13002	+	WP_143377402.1	33-166: TIGR02542 (T_forsyth_147, TANFOR domain.); 293-359: cd00063 (FN3, Fibronectin type 3 domain; One of three types of internal repeats found in the plasma protein fibronectin.)	Neg: LIPO(Sec/SPII) (Pr: 0.627), Pos: SP(Sec/SPI) (Pr: 0.714)	0 Y n8-20c28/29o	1718	WP_143377401.1	1423-1459: pfam13573 (SprB, SprB repeat.); 732-768: pfam13573 (SprB, SprB repeat.); 1043-1079: pfam13573 (SprB, SprB repeat.); 1348-1384: pfam13573 (SprB, SprB repeat.)	Neg: SP(Sec/SPI) (Pr: 0.913), Pos: SP(Sec/SPI) (Pr: 0.754)	0 Y n6-16c21/22o	1748	3	WP_143377403.1			0 0 o	173	-4	WP_143377404.1	154-239: pfam14424 (Toxin-deaminase, The BURPS668_1122 family of deaminases.)	Neg: SP(Sec/SPI) (Pr: 0.556), Pos: SP(Sec/SPI) (Pr: 0.642)	0 Y n4-14c18/19o	246	4	TANFOR	33	166	2.98e-11
39	490	Empedobacter sp. MRS2	NZ_SRPE01000008.1	70960	75888	+	WP_135836044.1		Neg: SP(Sec/SPI) (Pr: 0.820), Pos: SP(Sec/SPI) (Pr: 0.681)	0 Y n10-19c24/25o	1642	WP_135836043.1		Neg: SP(Sec/SPI) (Pr: 0.906), Pos: SP(Sec/SPI) (Pr: 0.810)	0 Y n9-19c23/24o	1546	10	WP_135836045.1	135-242: pfam15575 (Imm49, Immunity protein 49.)		0 0 o	262	1	WP_135836046.1			0 0 o	698	346	TANFOR	29	166	5.37e-10
40	49	Cellulophaga lytica DSM 7489	NC_015167.1	3541819	3548553	+	WP_013622662.1		Pos: SP(Sec/SPI) (Pr: 0.572)	0 Y n25-36c41/42o	2244	WP_013622661.1		Neg: LIPO(Sec/SPII) (Pr: 0.982), Pos: LIPO(Sec/SPII) (Pr: 0.992)	0 Y n6-17c22/23o	373	28	WP_013622663.1	50-237: pfam15575 (Imm49, Immunity protein 49.)		0 0 o	256	2					0	91	TANFOR	51	179	1.36e-09
41	50	Cellulophaga lytica HI1	NZ_CP009239.1	3520112	3526846	+	WP_013622662.1		Pos: SP(Sec/SPI) (Pr: 0.572)	0 Y n25-36c41/42o	2244	WP_013622661.1		Neg: LIPO(Sec/SPII) (Pr: 0.982), Pos: LIPO(Sec/SPII) (Pr: 0.992)	0 Y n6-17c22/23o	373	28	WP_013622663.1	50-237: pfam15575 (Imm49, Immunity protein 49.)		0 0 o	256	2					0	91	TANFOR	51	179	1.36e-09
42	316	Aquimarina sp. Aq78 Aquimarina sp. strain Aq78 assembly 01	NZ_OMKF01000011.1	65677	71604	+	WP_106792140.1	15-155: TIGR02542 (T_forsyth_147, TANFOR domain.)		0 Y n2-9c14/15o	1975	WP_106792139.1	44-188: COG3291 (COG3291, PKD repeat [Function unknown].)	Neg: LIPO(Sec/SPII) (Pr: 0.991), Pos: LIPO(Sec/SPII) (Pr: 0.938)	0 Y n4-16c21/22o	447	80	WP_106792141.1			0 0 o	160	-4	WP_106792164.1			0 0 o	752	399	TANFOR	15	155	1.93e-14
43	317	Aquimarina sp. Aq78 Aquimarina sp. strain Aq78 assembly02	NZ_OMKA01000001.1	953946	959873	-	WP_106792140.1	15-155: TIGR02542 (T_forsyth_147, TANFOR domain.)		0 Y n2-9c14/15o	1975	WP_106792139.1	44-188: COG3291 (COG3291, PKD repeat [Function unknown].)	Neg: LIPO(Sec/SPII) (Pr: 0.991), Pos: LIPO(Sec/SPII) (Pr: 0.938)	0 Y n4-16c21/22o	447	80	WP_106792141.1			0 0 o	160	-4	WP_106792164.1			0 0 o	752	399	TANFOR	15	155	1.93e-14
44	327	Aquimarina atlantica 22II-S11-z7	NZ_AQRA01000001.1	26653	32409	+	WP_131248740.1	27-167: TIGR02542 (T_forsyth_147, TANFOR domain.)	Neg: SP(Sec/SPI) (Pr: 0.715), Pos: SP(Sec/SPI) (Pr: 0.668)	0 Y n6-16c21/22o	1918	WP_034237511.1	44-258: COG3291 (COG3291, PKD repeat [Function unknown].)	Neg: LIPO(Sec/SPII) (Pr: 0.991), Pos: LIPO(Sec/SPII) (Pr: 0.949)	0 Y n4-16c21/22o	447	43	WP_034237515.1			0 0 o	162	-4	WP_117589999.1			0 0 o	755	366	TANFOR	27	167	5.84e-15
45	375	Flavobacterium sp. Leaf82	NZ_LMMA01000006.1	47730	50831	-	WP_056246856.1	27-160: TIGR02542 (T_forsyth_147, TANFOR domain.); 286-352: cd00063 (FN3, Fibronectin type 3 domain; One of three types of internal repeats found in the plasma protein fibronectin.)	Neg: SP(Sec/SPI) (Pr: 0.600), Pos: SP(Sec/SPI) (Pr: 0.515)	0 Y n8-19c24/25o	1033	WP_056246858.1	1402-1438: pfam13573 (SprB, SprB repeat.); 1022-1056: pfam13573 (SprB, SprB repeat.); 1650-1725: TIGR04183 (Por_Secre_tail, Por secretion system C-terminal sorting domain.); 1327-1363: pfam13573 (SprB, SprB repeat.)	Neg: SP(Sec/SPI) (Pr: 0.950), Pos: SP(Sec/SPI) (Pr: 0.868)	0 Y n4-12c18/19o	1726	4	WP_056246854.1			2 0 o14-35i146-162o	164	-23	WP_056246852.1		Neg: SP(Sec/SPI) (Pr: 0.951), Pos: SP(Sec/SPI) (Pr: 0.813)	0 Y n4-15c20/21o	232	2	TANFOR	27	160	6.02e-13
46	414	[Flexibacter] sp. ATCC 35103	NZ_MTQF01000009.1	4033	7131	-	WP_083694519.1	286-352: cd00063 (FN3, Fibronectin type 3 domain; One of three types of internal repeats found in the plasma protein fibronectin.); 27-160: TIGR02542 (T_forsyth_147, TANFOR domain.)	Neg: SP(Sec/SPI) (Pr: 0.600), Pos: SP(Sec/SPI) (Pr: 0.515)	0 Y n8-19c24/25o	1032	WP_083694521.1	1402-1438: pfam13573 (SprB, SprB repeat.); 1022-1056: pfam13573 (SprB, SprB repeat.); 1327-1363: pfam13573 (SprB, SprB repeat.); 1650-1725: TIGR04183 (Por_Secre_tail, Por secretion system C-terminal sorting domain.)	Neg: SP(Sec/SPI) (Pr: 0.969), Pos: SP(Sec/SPI) (Pr: 0.912)	0 Y n4-12c18/19o	1726	3	WP_083694516.1			2 0 o14-35i146-162o	164	-23	WP_083694514.1		Neg: SP(Sec/SPI) (Pr: 0.951), Pos: SP(Sec/SPI) (Pr: 0.816)	0 Y n4-15c20/21o	232	2	TANFOR	27	160	8.77e-12
47	325	Aquimarina pacifica SW150	NZ_JACC01000007.1	27126	32513	+	WP_034228744.1			0 0 o	1795	WP_051477573.1	52-294: COG3291 (COG3291, PKD repeat [Function unknown].)	Neg: LIPO(Sec/SPII) (Pr: 0.994), Pos: LIPO(Sec/SPII) (Pr: 0.957)	0 Y n14-25c30/31o	458	129	WP_025740915.1	292-324: pfam14414 (WHH, A nuclease of the HNH/ENDO VII superfamily with conserved WHH.)	Neg: LIPO(Sec/SPII) (Pr: 0.778), Pos: LIPO(Sec/SPII) (Pr: 0.886)	0 Y n10-18c23/24o	347	13	WP_051477577.1			0 0 o	750	207	TANFOR	1	129	1.33e-10
48	448	Aquimarina sp. AU119 Aquimarina sp. AU119	NZ_OMPF01000013.1	71730	77174	-	WP_109435530.1	8-142: TIGR02542 (T_forsyth_147, TANFOR domain.)		0 0 o	1814	WP_109435531.1	44-278: COG3291 (COG3291, PKD repeat [Function unknown].)	Neg: LIPO(Sec/SPII) (Pr: 0.987), Pos: LIPO(Sec/SPII) (Pr: 0.927)	0 Y n7-17c21/22o	449	87	WP_109435529.1	258-296: pfam14414 (WHH, A nuclease of the HNH/ENDO VII superfamily with conserved WHH.)	Neg: LIPO(Sec/SPII) (Pr: 0.779), Pos: LIPO(Sec/SPII) (Pr: 0.917)	0 Y n8-18c23/24o	309	29	WP_109435528.1			0 0 o	166	13	TANFOR	8	142	2.98e-12
49	218	Aquimarina brevivitae DSM 17196	NZ_SGXE01000001.1	222501	228308	+	WP_130284852.1	1791-1922: cl00089 (NUC, N/A.); 284-366: cd00063 (FN3, Fibronectin type 3 domain; One of three types of internal repeats found in the plasma protein fibronectin.); 25-157: TIGR02542 (T_forsyth_147, TANFOR domain.)	Neg: SP(Sec/SPI) (Pr: 0.982), Pos: SP(Sec/SPI) (Pr: 0.941)	0 Y n4-12c17/18o	1935	WP_130284851.1		Neg: SP(Sec/SPI) (Pr: 0.937), Pos: SP(Sec/SPI) (Pr: 0.751)	0 Y n5-13c18/19o	825	31	WP_130284853.1			0 0 o	238	12	WP_130284854.1		Neg: SP(Sec/SPI) (Pr: 0.684), Pos: SP(Sec/SPI) (Pr: 0.509)	0 Y n6-15c19/20o	1596	33	TANFOR	25	157	8.23e-11
50	354	Chryseobacterium limigenitum SUR2	NZ_FPKW01000042.1	2750	8176	-	WP_083582445.1	1666-1798: cl00089 (NUC, N/A.)	Pos: SP(Sec/SPI) (Pr: 0.769)	0 Y n27-38c45/46o	1808					0	64	WP_072412959.1			0 0 o	232	2	WP_072412958.1			0 0 o	235	8	TANFOR	56	187	6.65e-08
51	332	Aquimarina megaterium XH134	NZ_JACB01000043.1	71914	75036	+	WP_035096540.1	279-363: cd00063 (FN3, Fibronectin type 3 domain; One of three types of internal repeats found in the plasma protein fibronectin.)		0 Y n2-9c13/14o	1040	WP_025667065.1	44-242: COG3291 (COG3291, PKD repeat [Function unknown].)	Neg: LIPO(Sec/SPII) (Pr: 0.996), Pos: LIPO(Sec/SPII) (Pr: 0.967)	0 Y n4-16c21/22o	449	77	WP_025667067.1		Neg: SP(Sec/SPI) (Pr: 0.789), Pos: SP(Sec/SPI) (Pr: 0.714)	0 Y n5-13c18/19o	236	14	WP_035096542.1		Neg: SP(Sec/SPI) (Pr: 0.529)	0 0 o	194	35	TANFOR	18	152	1.28e-10
52	397	Aquimarina sp. AU58 Aquimarina_sp_AU58	NZ_OMPD01000014.1	2285366	2288635	+	WP_109852529.1	62-196: TIGR02542 (T_forsyth_147, TANFOR domain.)		0 Y n44-52c57/58o	1089	WP_109852527.1	44-260: COG3291 (COG3291, PKD repeat [Function unknown].)	Neg: LIPO(Sec/SPII) (Pr: 0.996), Pos: LIPO(Sec/SPII) (Pr: 0.970)	0 Y n4-16c21/22o	449	-56	WP_109852531.1		Neg: SP(Sec/SPI) (Pr: 0.854), Pos: SP(Sec/SPI) (Pr: 0.779)	0 Y n8-16c22/23o	239	0	WP_109852533.1			0 0 o	182	66	TANFOR	62	196	5.53e-12
53	178	Cellulophaga baltica 13	NZ_ATLH01000001.1	343944	349427	+	WP_024479182.1		Neg: SP(Sec/SPI) (Pr: 0.505), Pos: SP(Sec/SPI) (Pr: 0.630)	0 Y n19-28c33/34o	1827	WP_051327597.1			0 0 o	808	83	WP_034656511.1			0 0 o	126	5	WP_024479184.1	14-120: cl00516 (Restriction_endonuclease_like, N/A.)		0 0 i	127	326	TANFOR	45	183	6.47e-09
54	446	Aquimarina sediminis w01	NZ_POYJ01000001.1	885784	889638	-	WP_128755186.1	37-171: TIGR02542 (T_forsyth_147, TANFOR domain.); 484-601: PRK02224 (PRK02224, chromosome segregation protein; Provisional); 301-382: pfam16656 (Pur_ac_phosph_N, Purple acid Phosphatase, N-terminal domain.)	Pos: SP(Sec/SPI) (Pr: 0.624)	1 0 i12-35o	1284	WP_103068802.1	44-210: pfam08719 (DUF1768, Domain of unknown function (DUF1768).)		0 0 o	214	180	WP_103068642.1			0 0 o	126	2	WP_103068641.1			0 0 o	189	177	TANFOR	37	171	3.12e-15
55	457	Flavobacterium sp. 103	NZ_QENX01000001.1	208944	214484	+	WP_116795382.1	291-375: cd00063 (FN3, Fibronectin type 3 domain; One of three types of internal repeats found in the plasma protein fibronectin.)	Neg: SP(Sec/SPI) (Pr: 0.519), Pos: SP(Sec/SPI) (Pr: 0.807)	0 Y n5-16c26/27o	1846	WP_116795381.1		Neg: SP(Sec/SPI) (Pr: 0.775), Pos: SP(Sec/SPI) (Pr: 0.590)	0 Y n6-16c21/22o	817	155	WP_116795383.1			0 0 o	123	13	WP_116795384.1			0 0 o	169	79	TANFOR	33	159	3e-08
56	324	Pedobacter sp. R20-19	NZ_JCKI01000005.1	110813	114004	+	WP_029285862.1	369-439: cd00063 (FN3, Fibronectin type 3 domain; One of three types of internal repeats found in the plasma protein fibronectin.)		1 0 i81-100o	1063	WP_051666501.1		Neg: SP(Sec/SPI) (Pr: 0.993), Pos: SP(Sec/SPI) (Pr: 0.985)	0 Y n11-21c28/29o	1508	0	WP_029285864.1			0 0 o	125	-4	WP_029285866.1			0 0 o	136	16	TANFOR	103	233	4.06e-10
57	200	Tenacibaculum maritimum NCIMB 2154 NCIMB 2154T	NZ_LT634361.1	3035309	3041344	-	WP_100211793.1	70-211: TIGR02542 (T_forsyth_147, TANFOR domain.)		0 Y n49-60c65/66o	2011					0	0	WP_100211792.1			0 0 o	177	13	WP_100211791.1			0 0 o	180	9	TANFOR	70	211	1.85e-11
58	499	Flavobacterium sp. 245	NZ_SNXB01000016.1	22469	27745	+	WP_133527213.1	1545-1740: cl00173 (VIP2, N/A.)	Neg: SP(Sec/SPI) (Pr: 0.899), Pos: SP(Sec/SPI) (Pr: 0.766)	0 Y n8-18c23/24o	1758	WP_133527212.1	1387-1418: pfam13573 (SprB, SprB repeat.); 1002-1036: pfam13573 (SprB, SprB repeat.); 1631-1706: TIGR04183 (Por_Secre_tail, Por secretion system C-terminal sorting domain.)	Neg: SP(Sec/SPI) (Pr: 0.932), Pos: SP(Sec/SPI) (Pr: 0.650)	0 Y n6-14c20/21o	1707	3	WP_133527214.1			0 0 o	179	2	WP_133527215.1			0 0 o	87	195	TANFOR	28	161	3.44e-10
59	494	Candidatus Ornithobacterium hominis OH-22767	NZ_UNSC01000004.1	190947	195977	-	WP_119059449.1		Neg: SP(Sec/SPI) (Pr: 0.538)	0 Y n4-12c17/18o	1676	WP_119059450.1			0 0 o	206	249	WP_119059448.1			0 0 o	167	-19	WP_119059447.1		Neg: SP(Sec/SPI) (Pr: 0.722), Pos: SP(Sec/SPI) (Pr: 0.509)	0 Y n7-18c23/24o	81	5	TANFOR	22	159	5.97e-09
60	11	Chryseobacterium indoltheticum ATCC 27950	NZ_CP033929.1	3136595	3141301	-	WP_076559447.1		Pos: SP(Sec/SPI) (Pr: 0.701)	0 Y n27-37c41/42o	1568	WP_115596435.1			0 Y n2-10c15/16o	1561	63	WP_076559449.1			0 0 o	185	2	WP_123890121.1			0 0 o	188	150	TANFOR	55	186	9.94e-08
61	12	Chryseobacterium indoltheticum ATCC 27950	NZ_FTMF01000004.1	20808	25514	+	WP_076559447.1		Pos: SP(Sec/SPI) (Pr: 0.701)	0 Y n27-37c41/42o	1568	WP_076559445.1		Neg: SP(Sec/SPI) (Pr: 0.580), Pos: SP(Sec/SPI) (Pr: 0.575)	0 Y n6-16c21/22o	1567	63	WP_076559449.1			0 0 o	185	2	WP_076559451.1			0 0 o	176	186	TANFOR	55	186	9.94e-08
62	13	Chryseobacterium indoltheticum NCTC13560	NZ_UFVS01000001.1	194131	198837	-	WP_076559447.1		Pos: SP(Sec/SPI) (Pr: 0.701)	0 Y n27-37c41/42o	1568	WP_115596435.1			0 Y n2-10c15/16o	1561	63	WP_076559449.1			0 0 o	185	2	WP_076559451.1			0 0 o	176	186	TANFOR	55	186	9.94e-08
63	250	Filimonas lacunae NBRC 104114	NZ_AP017422.1	3036775	3042711	-	WP_076380754.1		Neg: SP(Sec/SPI) (Pr: 0.984), Pos: SP(Sec/SPI) (Pr: 0.972)	0 Y n6-16c21/22o	1978	WP_076380755.1		Neg: SP(Sec/SPI) (Pr: 0.997), Pos: SP(Sec/SPI) (Pr: 0.994)	0 Y n12-23c27/28o	1648	-4	WP_076380753.1			0 0 o	180	17	WP_076380752.1	12-332: TIGR03558 (oxido_grp_1, luciferase family oxidoreductase, group 1.)		0 0 o	338	274	TANFOR	25	156	1.6e-08
64	251	Filimonas lacunae DSM 21054	NZ_FTOR01000007.1	161996	167932	-	WP_076380754.1		Neg: SP(Sec/SPI) (Pr: 0.984), Pos: SP(Sec/SPI) (Pr: 0.972)	0 Y n6-16c21/22o	1978	WP_076380755.1		Neg: SP(Sec/SPI) (Pr: 0.997), Pos: SP(Sec/SPI) (Pr: 0.994)	0 Y n12-23c27/28o	1648	-4	WP_076380753.1			0 0 o	180	17	WP_076380752.1	12-332: TIGR03558 (oxido_grp_1, luciferase family oxidoreductase, group 1.)		0 0 o	338	274	TANFOR	25	156	1.6e-08
65	432	Chryseobacterium sp. 7	NZ_RCCA01000001.1	2987628	2991179	-	WP_121488439.1		Neg: SP(Sec/SPI) (Pr: 0.913), Pos: SP(Sec/SPI) (Pr: 0.949)	0 Y n25-37c42/43o	1183	WP_121488440.1		Neg: SP(Sec/SPI) (Pr: 0.868), Pos: SP(Sec/SPI) (Pr: 0.763)	0 Y n4-15c21/22o	1565	22	WP_121488438.1			0 0 o	190	-1	WP_121488437.1			0 0 o	157	14	TANFOR	53	184	2.29e-09
66	318	Aquimarina sp. Aq349 Aquimarina sp. strain Aq349	NZ_OMKB01000010.1	309413	315703	+	WP_108807968.1	286-368: cd00063 (FN3, Fibronectin type 3 domain; One of three types of internal repeats found in the plasma protein fibronectin.)	Neg: SP(Sec/SPI) (Pr: 0.967), Pos: SP(Sec/SPI) (Pr: 0.935)	0 Y n4-14c19/20o	2096	WP_108807967.1		Neg: LIPO(Sec/SPII) (Pr: 0.691), Pos: SP(Sec/SPI) (Pr: 0.582)	0 Y n5-15c20/21o	828	28	WP_074409511.1			0 0 o	163	9	WP_074409510.1			2 0 o28-46i74-93o	130	179	TANFOR	24	159	1.49e-10
67	319	Aquimarina sp. Aq349 Aquimarina sp. Aq3491	NZ_UYXD01000003.1	38622	44912	+	WP_108807968.1	286-368: cd00063 (FN3, Fibronectin type 3 domain; One of three types of internal repeats found in the plasma protein fibronectin.)	Neg: SP(Sec/SPI) (Pr: 0.967), Pos: SP(Sec/SPI) (Pr: 0.935)	0 Y n4-14c19/20o	2096	WP_108807967.1		Neg: LIPO(Sec/SPII) (Pr: 0.691), Pos: SP(Sec/SPI) (Pr: 0.582)	0 Y n5-15c20/21o	828	28	WP_074409511.1			0 0 o	163	9	WP_074409510.1			2 0 o28-46i74-93o	130	179	TANFOR	24	159	1.49e-10
68	333	Aquimarina megaterium EL33	NZ_FLRG01000006.1	133884	140174	-	WP_074409512.1	286-368: cd00063 (FN3, Fibronectin type 3 domain; One of three types of internal repeats found in the plasma protein fibronectin.)	Neg: SP(Sec/SPI) (Pr: 0.967), Pos: SP(Sec/SPI) (Pr: 0.935)	0 Y n4-14c19/20o	2096	WP_074409513.1		Neg: LIPO(Sec/SPII) (Pr: 0.691), Pos: SP(Sec/SPI) (Pr: 0.582)	0 Y n5-15c20/21o	832	28	WP_074409511.1			0 0 o	163	9	WP_074409510.1			2 0 o28-46i74-93o	130	179	TANFOR	24	159	1.43e-10
69	200	Tenacibaculum maritimum NCIMB 2154 NCIMB 2154T	NZ_LT634361.1	460910	464311	+	WP_100210636.1	532-626: cd06503 (ATP-synt_Fo_b, F-type ATP synthase, membrane subunit b.); 70-211: TIGR02542 (T_forsyth_147, TANFOR domain.)		0 Y n49-60c65/66o	1133	WP_024740140.1	37-318: PRK03592 (PRK03592, haloalkane dehalogenase; Provisional)	Pos: SP(Sec/SPI) (Pr: 0.862)	1 0 i12-31o	319	1003	WP_024742471.1			0 0 o	163	4	WP_100210637.1			0 0 o	323	103	TANFOR	70	211	1.4e-11
70	373	Aquimarina sp. AD1	NZ_CP031966.1	3596317	3602466	+	WP_118388067.1	286-368: cd00063 (FN3, Fibronectin type 3 domain; One of three types of internal repeats found in the plasma protein fibronectin.); 24-159: TIGR02542 (T_forsyth_147, TANFOR domain.)	Neg: SP(Sec/SPI) (Pr: 0.993), Pos: SP(Sec/SPI) (Pr: 0.921)	0 Y n4-14c19/20o	2049	WP_118388065.1		Neg: SP(Sec/SPI) (Pr: 0.843), Pos: SP(Sec/SPI) (Pr: 0.628)	0 Y n5-13c18/19o	825	23	WP_118388069.1			0 0 o	172	-1	WP_118388071.1			2 0 o6-29i178-200o	235	106	TANFOR	24	159	1.58e-13
71	482	Flavobacterium sp. 140616W15 140616W15	NZ_CP033068.1	735240	740201	-	WP_129537885.1	30-163: TIGR02542 (T_forsyth_147, TANFOR domain.); 288-355: cd00063 (FN3, Fibronectin type 3 domain; One of three types of internal repeats found in the plasma protein fibronectin.)	Neg: SP(Sec/SPI) (Pr: 0.966), Pos: SP(Sec/SPI) (Pr: 0.957)	0 Y n8-18c25/26o	1653	WP_129537886.1	1386-1422: pfam13573 (SprB, SprB repeat.); 1634-1708: TIGR04183 (Por_Secre_tail, Por secretion system C-terminal sorting domain.); 1311-1347: pfam13573 (SprB, SprB repeat.); 1005-1038: pfam13573 (SprB, SprB repeat.); 694-729: pfam13573 (SprB, SprB repeat.); 370-408: pfam13573 (SprB, SprB repeat.)	Neg: SP(Sec/SPI) (Pr: 0.948), Pos: SP(Sec/SPI) (Pr: 0.763)	0 Y n4-15c20/21o	1709	3	WP_129537884.1			0 0 i	171	-4	WP_129537883.1			0 0 o	126	237	TANFOR	30	163	1.15e-12
72	220	Niastella yeongjuensis DSM 17621	NZ_LVXG01000056.1	36697	42411	-	WP_081203147.1	38-164: TIGR02542 (T_forsyth_147, TANFOR domain.)	Neg: SP(Sec/SPI) (Pr: 0.972), Pos: SP(Sec/SPI) (Pr: 0.964)	0 Y n13-23c28/29o	1904	WP_081203148.1	747-777: pfam13573 (SprB, SprB repeat.)	Neg: SP(Sec/SPI) (Pr: 0.952), Pos: SP(Sec/SPI) (Pr: 0.896)	0 Y n5-18c22/23o	1068	28	WP_081203146.1			0 0 o	219	3					0	0	TANFOR	38	164	1.13e-11
73	221	Niastella yeongjuensis DSM 17621	NZ_FOCZ01000005.1	57352	63066	-	WP_081203147.1	38-164: TIGR02542 (T_forsyth_147, TANFOR domain.)	Neg: SP(Sec/SPI) (Pr: 0.972), Pos: SP(Sec/SPI) (Pr: 0.964)	0 Y n13-23c28/29o	1904	WP_081203148.1	747-777: pfam13573 (SprB, SprB repeat.)	Neg: SP(Sec/SPI) (Pr: 0.952), Pos: SP(Sec/SPI) (Pr: 0.896)	0 Y n5-18c22/23o	1068	28	WP_081203146.1			0 0 o	219	3					0	0	TANFOR	38	164	1.13e-11
74	55	Aquimarina latercula DSM 2041	NZ_KE387185.1	560305	565125	-	WP_035086125.1	24-159: TIGR02542 (T_forsyth_147, TANFOR domain.); 286-368: cd00063 (FN3, Fibronectin type 3 domain; One of three types of internal repeats found in the plasma protein fibronectin.)	Neg: SP(Sec/SPI) (Pr: 0.994), Pos: SP(Sec/SPI) (Pr: 0.935)	0 Y n4-14c19/20o	1606	WP_051336256.1		Neg: SP(Sec/SPI) (Pr: 0.911), Pos: SP(Sec/SPI) (Pr: 0.723)	0 Y n5-13c18/19o	825	23	WP_027394712.1			3 0 o6-27i39-59o65-83i	182	-1	WP_081415663.1	427-498: TIGR04183 (Por_Secre_tail, Por secretion system C-terminal sorting domain.)	Neg: SP(Sec/SPI) (Pr: 0.947), Pos: SP(Sec/SPI) (Pr: 0.846)	0 Y n6-16c21/22o	498	252	TANFOR	24	159	2.42e-14
75	199	Tenacibaculum maritimum TM-KORJJ	NZ_CP020822.1	777314	780496	+	WP_136437876.1	70-211: TIGR02542 (T_forsyth_147, TANFOR domain.)		0 Y n49-60c65/66o	1060	WP_136437875.1	29-110: cd00146 (PKD, polycystic kidney disease I (PKD) domain; similar to other cell-surface modules, with an IG-like fold; domain probably functions as a ligand binding site in protein-protein or protein-carbohydrate interactions; a single instance of the repeat is presented here.); 25-207: COG3291 (COG3291, PKD repeat [Function unknown].)	Neg: LIPO(Sec/SPII) (Pr: 0.977), Pos: LIPO(Sec/SPII) (Pr: 0.942)	0 Y n8-19c23/24o	453	924	WP_136437878.1			2 0 i14-36o139-156i	174	12	WP_136437880.1		Neg: SP(Sec/SPI) (Pr: 0.661)	0 Y n8-16c21/22o	230	-20	TANFOR	70	211	5.69e-11
76	514	Flavobacteriaceae bacterium M625	NZ_VFWZ01000001.1	685131	689189	-	WP_140589670.1	301-375: pfam16656 (Pur_ac_phosph_N, Purple acid Phosphatase, N-terminal domain.); 29-173: TIGR02542 (T_forsyth_147, TANFOR domain.)	Neg: SP(Sec/SPI) (Pr: 0.955), Pos: SP(Sec/SPI) (Pr: 0.963)	0 Y n11-19c24/25o	1352	WP_140589672.1		Neg: LIPO(Sec/SPII) (Pr: 0.999), Pos: LIPO(Sec/SPII) (Pr: 0.997)	0 Y n6-16c20/21o	371	4	WP_140589668.1			0 0 o	211	-4	WP_140589666.1			0 0 o	181	135	TANFOR	29	173	6.09e-13
77	111	Ornithobacterium rhinotracheale DSM 15997	NC_018016.1	2077363	2081481	+	WP_036601993.1	330-395: smart00060 (FN3, Fibronectin type 3 domain.)		0 0 o	1372	WP_014791698.1		Neg: SP(Sec/SPI) (Pr: 0.446)	0 Y n4-15c20/21o	1560	1	WP_014791700.1			4 0 i12-33o87-107i119-139o145-164i	175	-20	WP_014791701.1			4 0 i20-40o91-115i127-145o151-171i	179	15	TANFOR	64	195	1.48e-10
78	112	Ornithobacterium rhinotracheale ORT-UMN 88	NZ_CP006828.1	2029038	2033156	+	WP_036601993.1	330-395: smart00060 (FN3, Fibronectin type 3 domain.)		0 0 o	1372	WP_014791698.1		Neg: SP(Sec/SPI) (Pr: 0.446)	0 Y n4-15c20/21o	1560	1	WP_014791700.1			4 0 i12-33o87-107i119-139o145-164i	175	-20	WP_014791701.1			4 0 i20-40o91-115i127-145o151-171i	179	15	TANFOR	64	195	1.48e-10
79	113	Ornithobacterium rhinotracheale H06-030791	NZ_AXDE01000007.1	408146	412264	+	WP_036601993.1	330-395: smart00060 (FN3, Fibronectin type 3 domain.)		0 0 o	1372	WP_014791698.1		Neg: SP(Sec/SPI) (Pr: 0.446)	0 Y n4-15c20/21o	1560	1	WP_014791700.1			4 0 i12-33o87-107i119-139o145-164i	175	-20	WP_014791701.1			4 0 i20-40o91-115i127-145o151-171i	179	15	TANFOR	64	195	1.48e-10
80	168	Cellulophaga algicola DSM 14237	NC_014934.1	1270359	1275533	+	WP_013549918.1		Neg: SP(Sec/SPI) (Pr: 0.826), Pos: SP(Sec/SPI) (Pr: 0.842)	0 Y n12-25c30/31o	1724	WP_013549917.1			0 0 o	808	132	WP_041557556.1			0 0 o	168	2	WP_013549921.1			0 0 o	119	502	TANFOR	38	176	2.47e-08
81	528	Cellulophaga sp. RHA_52	NZ_VIRZ01000001.1	2547489	2550611	-	WP_144710166.1	319-389: pfam16656 (Pur_ac_phosph_N, Purple acid Phosphatase, N-terminal domain.)	Neg: SP(Sec/SPI) (Pr: 0.854), Pos: SP(Sec/SPI) (Pr: 0.938)	0 Y n21-32c39/40o	1040	WP_144711211.1	120-279: COG3291 (COG3291, PKD repeat [Function unknown].)	Neg: LIPO(Sec/SPII) (Pr: 0.996), Pos: LIPO(Sec/SPII) (Pr: 0.991)	0 Y n14-24c29/30o	455	1	WP_144710164.1		Pos: SP(Sec/SPI) (Pr: 0.480)	2 0 i7-27o137-159i	168	2	WP_144710162.1		Neg: SP(Sec/SPI) (Pr: 0.966), Pos: SP(Sec/SPI) (Pr: 0.786)	0 Y n6-14c20/21o	233	-4	TANFOR	49	177	1.44e-09
82	308	Aquimarina agarilytica ZC1	NZ_JH621296.1	3046	6255	-	WP_010182788.1	23-157: TIGR02542 (T_forsyth_147, TANFOR domain.)	Neg: SP(Sec/SPI) (Pr: 0.889), Pos: SP(Sec/SPI) (Pr: 0.727)	0 Y n5-13c18/19o	1069	WP_010182789.1	1419-1454: pfam13573 (SprB, SprB repeat.); 1344-1378: pfam13573 (SprB, SprB repeat.)	Neg: LIPO(Sec/SPII) (Pr: 0.545), Pos: SP(Sec/SPI) (Pr: 0.444)	0 Y n9-20c24/25o	1748	1174	WP_010182787.1		Pos: SP(Sec/SPI) (Pr: 0.609)	2 0 i7-24o135-158i	167	18	WP_010182786.1			1 0 o6-23i	236	-11	TANFOR	23	157	1.02e-11
83	315	Aquimarina sp. Aq135 Aquimarina sp. strain Aq135	NZ_OMKE01000011.1	74297	78073	-	WP_108867403.1	75-215: TIGR02542 (T_forsyth_147, TANFOR domain.); 337-420: pfam16656 (Pur_ac_phosph_N, Purple acid Phosphatase, N-terminal domain.)		2 0 o29-48i55-73o	1258	WP_108867404.1	113-261: COG3291 (COG3291, PKD repeat [Function unknown].)	Neg: LIPO(Sec/SPII) (Pr: 0.997), Pos: LIPO(Sec/SPII) (Pr: 0.986)	0 Y n7-17c22/23o	451	105	WP_108867402.1			0 0 o	170	2	WP_108867401.1			0 0 o	181	238	TANFOR	75	215	1.11e-12
84	390	Chryseobacterium sp. MYb7	NZ_PCOU01000007.1	47077	52269	-	WP_123906588.1		Neg: SP(Sec/SPI) (Pr: 0.950), Pos: SP(Sec/SPI) (Pr: 0.972)	0 Y n25-35c40/41o	1730	WP_105701803.1			0 0 o	1545	51	WP_105701701.1			0 0 o	176	5	WP_105701700.1			0 0 o	236	170	TANFOR	51	182	2.18e-09
85	423	Flavobacterium sp. ACN2	NZ_MRCM01000022.1	47815	52509	+	WP_095931572.1	287-377: cd00063 (FN3, Fibronectin type 3 domain; One of three types of internal repeats found in the plasma protein fibronectin.); 28-161: TIGR02542 (T_forsyth_147, TANFOR domain.)	Neg: SP(Sec/SPI) (Pr: 0.795), Pos: SP(Sec/SPI) (Pr: 0.545)	0 Y n10-17c23/24o	1564	WP_095931571.1	1390-1425: pfam13573 (SprB, SprB repeat.); 1638-1714: TIGR04183 (Por_Secre_tail, Por secretion system C-terminal sorting domain.); 1315-1351: pfam13573 (SprB, SprB repeat.); 698-728: pfam13573 (SprB, SprB repeat.); 1014-1042: pfam13573 (SprB, SprB repeat.)	Neg: SP(Sec/SPI) (Pr: 0.954), Pos: SP(Sec/SPI) (Pr: 0.901)	0 Y n4-15c20/21o	1714	3	WP_095931573.1			0 0 o	217	2	WP_095931574.1		Neg: LIPO(Sec/SPII) (Pr: 0.581), Pos: LIPO(Sec/SPII) (Pr: 0.618)	0 Y n5-15c19/20o	278	74	TANFOR	28	161	4.35e-13
86	189	Flavobacterium psychrophilum DK095	NZ_FYCI01000057.1	91343	96034	+	WP_094178969.1	282-349: smart00060 (FN3, Fibronectin type 3 domain.)	Neg: SP(Sec/SPI) (Pr: 0.608), Pos: SP(Sec/SPI) (Pr: 0.500)	0 Y n8-18c23/24o	1563	WP_094158149.1			0 0 i	132	165	WP_094167552.1			0 0 o	129	-7					0	116	TANFOR	24	152	3.32e-10
87	116	Flavobacterium pectinovorum ATCC 19366	NZ_MUHB01000007.1	873765	876986	+	WP_073397154.1	28-161: TIGR02542 (T_forsyth_147, TANFOR domain.); 287-353: cd00063 (FN3, Fibronectin type 3 domain; One of three types of internal repeats found in the plasma protein fibronectin.)	Neg: SP(Sec/SPI) (Pr: 0.849), Pos: SP(Sec/SPI) (Pr: 0.610)	0 Y n8-19c23/24o	1073	WP_073397152.1	1387-1423: pfam13573 (SprB, SprB repeat.); 1635-1710: TIGR04183 (Por_Secre_tail, Por secretion system C-terminal sorting domain.); 1007-1040: pfam13573 (SprB, SprB repeat.); 1312-1346: pfam13573 (SprB, SprB repeat.)	Neg: SP(Sec/SPI) (Pr: 0.994), Pos: SP(Sec/SPI) (Pr: 0.974)	0 Y n4-15c20/21o	1711	4	WP_073397156.1			0 0 o	131	9	WP_073397158.1			0 0 i	250	195	TANFOR	28	161	3.34e-12
88	117	Flavobacterium pectinovorum DSM 6368	NZ_FRBX01000005.1	248340	251561	+	WP_073397154.1	28-161: TIGR02542 (T_forsyth_147, TANFOR domain.); 287-353: cd00063 (FN3, Fibronectin type 3 domain; One of three types of internal repeats found in the plasma protein fibronectin.)	Neg: SP(Sec/SPI) (Pr: 0.849), Pos: SP(Sec/SPI) (Pr: 0.610)	0 Y n8-19c23/24o	1073	WP_073397152.1	1387-1423: pfam13573 (SprB, SprB repeat.); 1635-1710: TIGR04183 (Por_Secre_tail, Por secretion system C-terminal sorting domain.); 1007-1040: pfam13573 (SprB, SprB repeat.); 1312-1346: pfam13573 (SprB, SprB repeat.)	Neg: SP(Sec/SPI) (Pr: 0.994), Pos: SP(Sec/SPI) (Pr: 0.974)	0 Y n4-15c20/21o	1711	4	WP_073397156.1			0 0 o	131	9	WP_073397158.1			0 0 i	250	195	TANFOR	28	161	3.34e-12
89	554	Chitinophaga sp. BN140078	NZ_VUOC01000002.1	901488	906608	-	WP_149837918.1	313-394: cd00063 (FN3, Fibronectin type 3 domain; One of three types of internal repeats found in the plasma protein fibronectin.)	Neg: SP(Sec/SPI) (Pr: 0.714), Pos: SP(Sec/SPI) (Pr: 0.812)	0 Y n18-29c33/34o	1706	WP_149837919.1		Neg: SP(Sec/SPI) (Pr: 0.977), Pos: SP(Sec/SPI) (Pr: 0.852)	0 Y n7-18c22/23o	574	14	WP_149837917.1			0 0 o	129	13	WP_149837916.1		Neg: SP(Sec/SPI) (Pr: 0.965), Pos: SP(Sec/SPI) (Pr: 0.842)	0 Y n4-12c20/21o	1501	47	TANFOR	44	167	1.32e-09
90	530	Chryseobacterium echinoideorum CC-CZW010	NZ_VKNW01000001.1	46496	50992	+	WP_144280844.1		Pos: SP(Sec/SPI) (Pr: 0.643)	0 Y n26-37c41/42o	1498					0	68	WP_144280845.1			0 0 o	136	5	WP_144280846.1	34-123: TIGR01299 (synapt_SV2, synaptic vesicle protein SV2.)		0 0 o	159	24	TANFOR	55	186	1.65e-08
91	196	Tenacibaculum ovolyticum DSM 18103	NZ_KE387163.1	16576	23040	+	WP_028888923.1	2003-2153: pfam14436 (EndoU_bacteria, Bacterial EndoU nuclease.); 290-356: pfam00041 (fn3, Fibronectin type III domain.)	Neg: SP(Sec/SPI) (Pr: 0.649), Pos: SP(Sec/SPI) (Pr: 0.732)	0 Y n14-22c28/29o	2154	WP_028888922.1	56-272: TIGR00864 (PCC, polycystin cation channel protein.)	Neg: LIPO(Sec/SPII) (Pr: 0.957), Pos: LIPO(Sec/SPII) (Pr: 0.798)	0 Y n4-12c16/17o	450	13	WP_028888924.1			0 0 o	135	4	WP_028888925.1			1 0 o47-68i	134	410	TANFOR	38	167	2.62e-08
92	192	Flavobacterium psychrophilum 19-SE055_S7_R1.fastq.gz	NZ_UXET01000022.1	6230	9862	-	WP_134354052.1	282-349: smart00060 (FN3, Fibronectin type 3 domain.)	Neg: SP(Sec/SPI) (Pr: 0.611), Pos: SP(Sec/SPI) (Pr: 0.464)	0 Y n8-18c23/24o	1210	WP_094158145.1		Neg: LIPO(Sec/SPII) (Pr: 0.548), Pos: LIPO(Sec/SPII) (Pr: 0.661)	0 Y n8-17c21/22o	562	3	WP_094158149.1			0 0 i	132	2	WP_094158150.1	282-349: smart00060 (FN3, Fibronectin type 3 domain.)	Neg: SP(Sec/SPI) (Pr: 0.608), Pos: SP(Sec/SPI) (Pr: 0.500)	0 Y n8-18c23/24o	1679	165	TANFOR	24	152	2.34e-10
93	337	Chryseobacterium sp. CF365	NZ_JQJM01000004.1	95185	98403	+	WP_034692146.1		Neg: SP(Sec/SPI) (Pr: 0.564), Pos: SP(Sec/SPI) (Pr: 0.811)	0 Y n26-38c44/45o	1072	WP_034692145.1		Neg: SP(Sec/SPI) (Pr: 0.954), Pos: SP(Sec/SPI) (Pr: 0.926)	0 Y n5-16c21/22o	1565	44	WP_034692147.1			0 0 i	92	3	WP_034692148.1			0 0 o	242	165	TANFOR	55	186	6.77e-09
94	445	Tamlana sp. UJ94	NZ_CP025938.1	2685588	2687879	+	WP_102996097.1	37-166: TIGR02542 (T_forsyth_147, TANFOR domain.); 300-385: pfam16656 (Pur_ac_phosph_N, Purple acid Phosphatase, N-terminal domain.)	Neg: SP(Sec/SPI) (Pr: 0.943), Pos: SP(Sec/SPI) (Pr: 0.819)	0 Y n12-23c27/28o	763	WP_102996096.1			0 0 o	72	83	WP_102996098.1			2 0 i12-31o70-88i	97	17	WP_102996099.1		Neg: SP(Sec/SPI) (Pr: 0.990), Pos: SP(Sec/SPI) (Pr: 0.980)	0 Y n8-19c24/25o	761	5	TANFOR	37	166	1.98e-13
95	397	Aquimarina sp. AU58 Aquimarina_sp_AU58	NZ_OMPD01000014.1	2458423	2464104	+	WP_109852759.1	15-155: TIGR02542 (T_forsyth_147, TANFOR domain.)		0 Y n2-9c14/15o	1893	WP_109852758.1		Neg: LIPO(Sec/SPII) (Pr: 0.991), Pos: LIPO(Sec/SPII) (Pr: 0.944)	0 Y n4-16c21/22o	447	80	WP_109852760.1	2-77: pfam15603 (Imm74, Immunity protein 74.)		0 0 i	84	-4	WP_109853605.1			0 0 o	754	269	TANFOR	15	155	5.13e-15
96	415	Flavobacterium sp. LM4	NZ_MUFW01000002.1	623697	626915	-	WP_078228562.1	980-1065: pfam14424 (Toxin-deaminase, The BURPS668_1122 family of deaminases.); 33-166: TIGR02542 (T_forsyth_147, TANFOR domain.); 292-358: cd00063 (FN3, Fibronectin type 3 domain; One of three types of internal repeats found in the plasma protein fibronectin.)	Neg: SP(Sec/SPI) (Pr: 0.529), Pos: SP(Sec/SPI) (Pr: 0.808)	0 Y n8-19c28/29o	1072	WP_078228565.1	410-446: pfam13573 (SprB, SprB repeat.); 658-734: TIGR04183 (Por_Secre_tail, Por secretion system C-terminal sorting domain.); 335-371: pfam13573 (SprB, SprB repeat.); 29-62: pfam13573 (SprB, SprB repeat.)		0 0 o	734	4	WP_078228559.1			0 0 o	79	-14	WP_078228557.1			0 0 o	124	206	TANFOR	33	166	2.4e-13
97	280	Flavobacterium ginsenosidimutans THG 01	NZ_QJRJ01000082.1	263838	267071	+	WP_111290540.1	297-381: pfam16656 (Pur_ac_phosph_N, Purple acid Phosphatase, N-terminal domain.); 37-161: TIGR02542 (T_forsyth_147, TANFOR domain.)	Neg: SP(Sec/SPI) (Pr: 0.915), Pos: SP(Sec/SPI) (Pr: 0.570)	0 Y n9-17c23/24o	1077	WP_111290538.1	1-246: PRK06500 (PRK06500, short chain dehydrogenase; Provisional)		0 0 o	247	284	WP_111290542.1			0 0 o	81	-4	WP_111290544.1			0 0 o	86	84	TANFOR	37	161	4.69e-14
98	52	Flavobacterium johnsoniae JH0041	NZ_RBIA01000001.1	4408323	4413464	-	WP_121362151.1	28-161: TIGR02542 (T_forsyth_147, TANFOR domain.); 287-377: cd00063 (FN3, Fibronectin type 3 domain; One of three types of internal repeats found in the plasma protein fibronectin.)	Neg: SP(Sec/SPI) (Pr: 0.825), Pos: SP(Sec/SPI) (Pr: 0.672)	0 Y n7-17c25/26o	1713	WP_121362152.1	1386-1421: pfam13573 (SprB, SprB repeat.); 1634-1709: TIGR04183 (Por_Secre_tail, Por secretion system C-terminal sorting domain.); 362-397: pfam13573 (SprB, SprB repeat.); 1311-1347: pfam13573 (SprB, SprB repeat.)	Neg: SP(Sec/SPI) (Pr: 0.810), Pos: SP(Sec/SPI) (Pr: 0.928)	0 Y n4-15c20/21o	1710	1	WP_121362150.1			0 0 o	112	-4	WP_121362149.1			0 0 o	140	200	TANFOR	28	161	4.79e-13
99	53	Flavobacterium johnsoniae JH0037	NZ_RCWU01000001.1	2886831	2891972	+	WP_121362151.1	28-161: TIGR02542 (T_forsyth_147, TANFOR domain.); 287-377: cd00063 (FN3, Fibronectin type 3 domain; One of three types of internal repeats found in the plasma protein fibronectin.)	Neg: SP(Sec/SPI) (Pr: 0.825), Pos: SP(Sec/SPI) (Pr: 0.672)	0 Y n7-17c25/26o	1713	WP_121362152.1	1386-1421: pfam13573 (SprB, SprB repeat.); 1634-1709: TIGR04183 (Por_Secre_tail, Por secretion system C-terminal sorting domain.); 362-397: pfam13573 (SprB, SprB repeat.); 1311-1347: pfam13573 (SprB, SprB repeat.)	Neg: SP(Sec/SPI) (Pr: 0.810), Pos: SP(Sec/SPI) (Pr: 0.928)	0 Y n4-15c20/21o	1710	1	WP_121362150.1			0 0 o	112	-4	WP_121362149.1			0 0 o	140	200	TANFOR	28	161	4.79e-13
100	63	Bergeyella zoohelcum ATCC 43767	NZ_JH932293.1	1242776	1245460	+	WP_002663126.1	295-368: pfam00041 (fn3, Fibronectin type III domain.)	Neg: SP(Sec/SPI) (Pr: 0.928), Pos: SP(Sec/SPI) (Pr: 0.941)	0 Y n7-17c25/26o	894	WP_002663122.1	54-198: cd03399 (SPFH_flotillin, Flotillin or reggie family; SPFH (stomatin, prohibitin, flotillin, and HflK/C) superfamily.); 1-461: COG2268 (YqiK, Uncharacterized membrane protein YqiK, contains Band7/PHB/SPFH domain [Function unknown].)		0 Y n4-15c20/21o	512	1196	WP_002663128.1			1 0 o6-27i	124	4	WP_034985680.1			0 0 o	196	58	TANFOR	30	161	3.49e-08
101	64	Bergeyella zoohelcum NCTC11660	NZ_UFTL01000001.1	366625	369309	-	WP_002663126.1	295-368: pfam00041 (fn3, Fibronectin type III domain.)	Neg: SP(Sec/SPI) (Pr: 0.928), Pos: SP(Sec/SPI) (Pr: 0.941)	0 Y n7-17c25/26o	894					0	0	WP_002663128.1			1 0 o6-27i	124	4	WP_115599238.1			0 0 o	188	82	TANFOR	30	161	3.49e-08
102	281	Ohtaekwangia koreensis DSM 25262	NZ_FUZU01000003.1	108679	112515	-	WP_079688562.1	1210-1274: pfam14436 (EndoU_bacteria, Bacterial EndoU nuclease.); 44-170: TIGR02542 (T_forsyth_147, TANFOR domain.)	Neg: SP(Sec/SPI) (Pr: 0.841), Pos: SP(Sec/SPI) (Pr: 0.886)	0 Y n24-35c40/41o	1278	WP_079688563.1	782-818: pfam13573 (SprB, SprB repeat.); 861-891: pfam13573 (SprB, SprB repeat.)	Neg: SP(Sec/SPI) (Pr: 0.971), Pos: SP(Sec/SPI) (Pr: 0.784)	0 Y n4-13c18/19o	1182	16	WP_079688561.1			0 0 o	108	5	WP_079688560.1		Neg: SP(Sec/SPI) (Pr: 0.847), Pos: SP(Sec/SPI) (Pr: 0.700)	0 Y n7-18c22/23o	305	26	TANFOR	44	170	1.6e-12
103	277	Chryseobacterium culicis DSM 23031	NZ_FNWQ01000001.1	1087795	1091253	+	WP_089690294.1		Neg: SP(Sec/SPI) (Pr: 0.592), Pos: SP(Sec/SPI) (Pr: 0.829)	0 Y n26-38c44/45o	1152					0	44	WP_089690295.1			0 0 o	103	5	WP_089690296.1			0 0 o	207	165	TANFOR	55	186	2.17e-08
104	236	Chryseobacterium lathyri KCTC 22544	NZ_QNFY01000021.1	26906	32029	+	WP_111960828.1		Neg: SP(Sec/SPI) (Pr: 0.926), Pos: SP(Sec/SPI) (Pr: 0.959)	0 Y n25-35c40/41o	1707	WP_111960826.1		Neg: LIPO(Sec/SPII) (Pr: 0.861), Pos: LIPO(Sec/SPII) (Pr: 0.868)	0 Y n4-15c23/24o	1559	51	WP_111960830.1			0 0 o	108	-1	WP_111960832.1			0 0 o	111	108	TANFOR	51	182	3.09e-09
105	521	Chryseobacterium lathyri NBRC 105250	NZ_BJYI01000007.1	16869	21992	-	WP_111960828.1		Neg: SP(Sec/SPI) (Pr: 0.926), Pos: SP(Sec/SPI) (Pr: 0.959)	0 Y n25-35c40/41o	1707	WP_111960826.1		Neg: LIPO(Sec/SPII) (Pr: 0.861), Pos: LIPO(Sec/SPII) (Pr: 0.868)	0 Y n4-15c23/24o	1559	51	WP_111960830.1			0 0 o	108	-1	WP_146897080.1			0 0 o	111	108	TANFOR	51	182	3.09e-09
106	492	Chryseobacterium sp. 17S1E7	NZ_CP034661.1	1624280	1628845	-	WP_126651690.1		Neg: SP(Sec/SPI) (Pr: 0.619), Pos: SP(Sec/SPI) (Pr: 0.843)	0 Y n26-38c44/45o	1521					0	45	WP_126651689.1			0 0 o	136	5	WP_126651688.1			0 0 i	109	-20	TANFOR	55	186	8.44e-09
107	274	Aquimarina macrocephali JAMB N27	NZ_JACA01000019.1	72447	76016	-	WP_084050326.1	1091-1180: pfam12639 (Colicin-DNase, DNase/tRNase domain of colicin-like bacteriocin.); 310-370: pfam16656 (Pur_ac_phosph_N, Purple acid Phosphatase, N-terminal domain.)	Neg: SP(Sec/SPI) (Pr: 0.704), Pos: SP(Sec/SPI) (Pr: 0.932)	0 Y n10-21c30/31o	1189	WP_024770364.1	119-282: COG3291 (COG3291, PKD repeat [Function unknown].)	Neg: LIPO(Sec/SPII) (Pr: 0.778), Pos: LIPO(Sec/SPII) (Pr: 0.876)	0 Y n7-18c23/24o	456	5	WP_024770363.1	15-140: pfam14568 (SUKH_6, SMI1-KNR4 cell-wall.)		0 0 o	151	23	WP_024770362.1		Neg: LIPO(Sec/SPII) (Pr: 0.994), Pos: LIPO(Sec/SPII) (Pr: 0.991)	0 Y n4-15c20/21o	148	173	TANFOR	26	159	1.22e-08
108	351	Flavobacterium sp. MEB061	NZ_JXQR01000059.1	63726	67514	-	WP_042566595.1	28-161: TIGR02542 (T_forsyth_147, TANFOR domain.); 297-387: pfam16656 (Pur_ac_phosph_N, Purple acid Phosphatase, N-terminal domain.)	Neg: SP(Sec/SPI) (Pr: 0.884), Pos: SP(Sec/SPI) (Pr: 0.911)	0 Y n4-17c25/26o	1262	WP_042566596.1			0 0 o	172	254	WP_042566592.1			1 0 o6-31i	154	511	WP_042566591.1			1 0 i21-47o	173	-20	TANFOR	28	161	1.37e-14
109	382	Flavobacterium crassostreae LPB0076	NZ_LVEP01000038.1	154143	159893	-	WP_066336097.1			0 0 o	1916	WP_066336098.1	3-108: pfam05635 (23S_rRNA_IVP, 23S rRNA-intervening sequence protein.)		0 0 i	120	-4	WP_066336094.1			0 0 o	151	2	WP_066336091.1		Neg: SP(Sec/SPI) (Pr: 0.691), Pos: LIPO(Sec/SPII) (Pr: 0.558)	0 Y n8-16c21/22o	325	1	TANFOR	86	214	4.03e-09
110	383	Flavobacterium crassostreae LPB0076	NZ_CP017688.1	224371	230121	+	WP_066336097.1			0 0 o	1916	WP_066336098.1	3-108: pfam05635 (23S_rRNA_IVP, 23S rRNA-intervening sequence protein.)		0 0 i	120	-4	WP_066336094.1			0 0 o	151	2	WP_066336091.1		Neg: SP(Sec/SPI) (Pr: 0.691), Pos: LIPO(Sec/SPII) (Pr: 0.558)	0 Y n8-16c21/22o	325	1	TANFOR	86	214	4.03e-09
111	351	Flavobacterium sp. MEB061	NZ_JXQR01000014.1	175004	180952	+	WP_082036924.1	1913-1977: pfam14424 (Toxin-deaminase, The BURPS668_1122 family of deaminases.); 1673-1778: pfam14021 (TNT, Tuberculosis necrotizing toxin.); 28-161: TIGR02542 (T_forsyth_147, TANFOR domain.); 287-353: cd00063 (FN3, Fibronectin type 3 domain; One of three types of internal repeats found in the plasma protein fibronectin.)	Neg: SP(Sec/SPI) (Pr: 0.849), Pos: SP(Sec/SPI) (Pr: 0.610)	0 Y n8-19c23/24o	1982	WP_082036923.1	1370-1406: pfam13573 (SprB, SprB repeat.); 1295-1331: pfam13573 (SprB, SprB repeat.); 1618-1693: TIGR04183 (Por_Secre_tail, Por secretion system C-terminal sorting domain.); 989-1023: pfam13573 (SprB, SprB repeat.)	Neg: SP(Sec/SPI) (Pr: 0.985), Pos: SP(Sec/SPI) (Pr: 0.850)	0 Y n4-15c20/21o	1694	4	WP_042563890.1	19-139: pfam09346 (SMI1_KNR4, SMI1 / KNR4 family (SUKH-1).)		0 0 o	149	10	WP_042563891.1			0 0 o	121	30	TANFOR	28	161	9.3e-12
112	116	Flavobacterium pectinovorum ATCC 19366	NZ_MUHB01000009.1	118236	121802	+	WP_084540188.1	27-160: TIGR02542 (T_forsyth_147, TANFOR domain.); 296-386: pfam16656 (Pur_ac_phosph_N, Purple acid Phosphatase, N-terminal domain.)	Neg: SP(Sec/SPI) (Pr: 0.539), Pos: SP(Sec/SPI) (Pr: 0.540)	0 Y n7-18c24/25o	1188					0	0	WP_073392976.1			1 0 i7-31o	158	0	WP_073392979.1			1 0 o6-29i	151	-4	TANFOR	27	160	9.39e-16
113	117	Flavobacterium pectinovorum DSM 6368	NZ_FRBX01000001.1	209650	213216	+	WP_084540188.1	27-160: TIGR02542 (T_forsyth_147, TANFOR domain.); 296-386: pfam16656 (Pur_ac_phosph_N, Purple acid Phosphatase, N-terminal domain.)	Neg: SP(Sec/SPI) (Pr: 0.539), Pos: SP(Sec/SPI) (Pr: 0.540)	0 Y n7-18c24/25o	1188					0	0	WP_073392976.1			1 0 i7-31o	158	0	WP_073392979.1			1 0 o6-29i	151	-4	TANFOR	27	160	9.39e-16
114	233	Flavobacterium hercynium DSM 18292	NZ_MUGW01000011.1	42496	46074	-	WP_123868217.1	962-1192: COG5444 (YeeF, Predicted ribonuclease, toxin component of the YeeF-YezG toxin-antitoxin module [Defense mechanisms].); 299-381: pfam16656 (Pur_ac_phosph_N, Purple acid Phosphatase, N-terminal domain.); 41-159: TIGR02542 (T_forsyth_147, TANFOR domain.)	Neg: SP(Sec/SPI) (Pr: 0.607), Pos: SP(Sec/SPI) (Pr: 0.812)	0 Y n8-18c27/28o	1192	WP_089048870.1	1032-1107: TIGR04183 (Por_Secre_tail, Por secretion system C-terminal sorting domain.); 784-819: pfam13573 (SprB, SprB repeat.); 708-744: pfam13573 (SprB, SprB repeat.)	Neg: SP(Sec/SPI) (Pr: 0.969), Pos: SP(Sec/SPI) (Pr: 0.847)	0 Y n4-13c18/19o	1108	1	WP_089048868.1	33-139: pfam09346 (SMI1_KNR4, SMI1 / KNR4 family (SUKH-1).)		0 0 i	155	18	WP_089048867.1			0 0 o	137	116	TANFOR	41	159	1.03e-10
115	324	Pedobacter sp. R20-19	NZ_JCKI01000007.1	38298	41879	-	WP_029286891.1	304-374: cd00063 (FN3, Fibronectin type 3 domain; One of three types of internal repeats found in the plasma protein fibronectin.); 38-168: TIGR02542 (T_forsyth_147, TANFOR domain.)	Neg: SP(Sec/SPI) (Pr: 0.826), Pos: SP(Sec/SPI) (Pr: 0.945)	0 Y n17-28c32/33o	1193	WP_029286892.1	35-610: COG3975 (COG3975, Predicted metalloprotease, contains C-terminal PDZ domain [General function prediction only].)	Neg: SP(Sec/SPI) (Pr: 0.908), Pos: SP(Sec/SPI) (Pr: 0.909)	0 Y n6-17c22/23o	610	180	WP_029286890.1			0 0 o	156	2	WP_029286889.1			0 0 i	68	586	TANFOR	38	168	5.65e-11
116	423	Flavobacterium sp. ACN2	NZ_MRCM01000006.1	115517	118732	-	WP_095929201.1	297-381: pfam16656 (Pur_ac_phosph_N, Purple acid Phosphatase, N-terminal domain.); 37-161: TIGR02542 (T_forsyth_147, TANFOR domain.)	Neg: SP(Sec/SPI) (Pr: 0.911), Pos: SP(Sec/SPI) (Pr: 0.564)	0 Y n9-17c23/24o	1071	WP_095929202.1	8-72: pfam12844 (HTH_19, Helix-turn-helix domain.)		0 0 o	135	328	WP_095929200.1			0 0 i	140	2					0	0	TANFOR	37	161	2e-14
117	64	Bergeyella zoohelcum NCTC11660	NZ_UFTL01000001.1	25191	28715	+	WP_115599224.1	315-380: cd00063 (FN3, Fibronectin type 3 domain; One of three types of internal repeats found in the plasma protein fibronectin.)	Neg: SP(Sec/SPI) (Pr: 0.540), Pos: SP(Sec/SPI) (Pr: 0.640)	0 Y n20-31c38/39o	1174	WP_002663707.1		Neg: SP(Sec/SPI) (Pr: 0.934), Pos: SP(Sec/SPI) (Pr: 0.717)	0 Y n8-16c21/22o	1566	54	WP_034986397.1			0 0 o	136	-19	WP_002664688.1			0 0 i	102	44	TANFOR	43	180	7.53e-08
118	199	Tenacibaculum maritimum TM-KORJJ	NZ_CP020822.1	166032	169595	+	WP_136437400.1	532-626: cd06503 (ATP-synt_Fo_b, F-type ATP synthase, membrane subunit b.); 70-211: TIGR02542 (T_forsyth_147, TANFOR domain.)		1 0 i45-65o	1187	WP_024740140.1	37-318: PRK03592 (PRK03592, haloalkane dehalogenase; Provisional)	Pos: SP(Sec/SPI) (Pr: 0.862)	1 0 i12-31o	319	1001	WP_100210638.1			0 0 o	137	5					0	0	TANFOR	70	211	1.05e-11
119	191	Flavobacterium psychrophilum 15-SE027_S5_R1.fastq.gz	NZ_UXER01000133.1	87440	92497	+	WP_134386545.1	282-349: smart00060 (FN3, Fibronectin type 3 domain.); 24-152: TIGR02542 (T_forsyth_147, TANFOR domain.)	Neg: SP(Sec/SPI) (Pr: 0.632), Pos: SP(Sec/SPI) (Pr: 0.491)	0 Y n8-18c23/24o	1685	WP_094178546.1		Neg: LIPO(Sec/SPII) (Pr: 0.552), Pos: LIPO(Sec/SPII) (Pr: 0.660)	0 Y n8-17c21/22o	562	4	WP_094158152.1			0 0 o	147	1					0	148	TANFOR	24	152	9.24e-12
120	193	Flavobacterium psychrophilum 81-SE571_S23_R1.fastq.gz	NZ_UXFZ01000018.1	74662	79719	+	WP_134345728.1	282-349: smart00060 (FN3, Fibronectin type 3 domain.); 24-152: TIGR02542 (T_forsyth_147, TANFOR domain.)	Neg: SP(Sec/SPI) (Pr: 0.632), Pos: SP(Sec/SPI) (Pr: 0.491)	0 Y n8-18c23/24o	1685	WP_094178546.1		Neg: LIPO(Sec/SPII) (Pr: 0.552), Pos: LIPO(Sec/SPII) (Pr: 0.660)	0 Y n8-17c21/22o	562	4	WP_094158152.1			0 0 o	147	1					0	148	TANFOR	24	152	9.24e-12
121	190	Flavobacterium psychrophilum FI146	NZ_FYCE01000086.1	90280	95319	+	WP_094158150.1	282-349: smart00060 (FN3, Fibronectin type 3 domain.)	Neg: SP(Sec/SPI) (Pr: 0.608), Pos: SP(Sec/SPI) (Pr: 0.500)	0 Y n8-18c23/24o	1679	WP_094158149.1			0 0 i	132	165	WP_094158152.1			0 0 o	147	1					0	0	TANFOR	24	152	4.17e-10
122	192	Flavobacterium psychrophilum 19-SE055_S7_R1.fastq.gz	NZ_UXET01000022.1	624	5663	-	WP_094158150.1	282-349: smart00060 (FN3, Fibronectin type 3 domain.)	Neg: SP(Sec/SPI) (Pr: 0.608), Pos: SP(Sec/SPI) (Pr: 0.500)	0 Y n8-18c23/24o	1679	WP_094158149.1			0 0 i	132	165	WP_094158152.1			0 0 o	147	1					0	0	TANFOR	24	152	4.17e-10
123	481	Tenacibaculum sp. DSM 106434	NZ_CP032548.1	2479005	2482202	-	WP_125067770.1	291-356: pfam00041 (fn3, Fibronectin type III domain.)	Neg: SP(Sec/SPI) (Pr: 0.461), Pos: SP(Sec/SPI) (Pr: 0.655)	0 Y n16-26c30/31o	1065	WP_125067771.1	113-276: COG3291 (COG3291, PKD repeat [Function unknown].); 40-106: cd00146 (PKD, polycystic kidney disease I (PKD) domain; similar to other cell-surface modules, with an IG-like fold; domain probably functions as a ligand binding site in protein-protein or protein-carbohydrate interactions; a single instance of the repeat is presented here.)	Neg: LIPO(Sec/SPII) (Pr: 0.984), Pos: LIPO(Sec/SPII) (Pr: 0.940)	0 Y n5-17c22/23o	450	10	WP_125067769.1		Neg: SP(Sec/SPI) (Pr: 0.445)	1 Y n3-14c18/19o116-139i	149	1	WP_125067768.1		Neg: SP(Sec/SPI) (Pr: 0.663), Pos: SP(Sec/SPI) (Pr: 0.469)	0 Y n4-15c20/21o	404	11	TANFOR	33	167	2.15e-08
124	354	Chryseobacterium limigenitum SUR2	NZ_FPKW01000043.1	1686	7157	-	WP_083582446.1		Neg: SP(Sec/SPI) (Pr: 0.728), Pos: SP(Sec/SPI) (Pr: 0.928)	0 Y n27-38c45/46o	1823					0	64	WP_072412962.1			0 0 o	147	-4	WP_072412961.1			2 0 i108-128o140-159i	169	81	TANFOR	56	187	3.98e-08
125	296	Flavobacterium araucananum DSM 24704	NZ_MUGS01000034.1	81298	84480	+	WP_089480504.1	286-352: cd00063 (FN3, Fibronectin type 3 domain; One of three types of internal repeats found in the plasma protein fibronectin.); 27-155: TIGR02542 (T_forsyth_147, TANFOR domain.)	Neg: SP(Sec/SPI) (Pr: 0.956), Pos: SP(Sec/SPI) (Pr: 0.765)	0 Y n8-18c22/23o	1060					0	0	WP_089480505.1			0 0 o	145	0	WP_089480506.1	38-188: COG0664 (Crp, cAMP-binding domain of CRP or a regulatory subunit of cAMP-dependent protein kinases [Signal transduction mechanisms].)		0 0 o	194	354	TANFOR	27	155	2.22e-12
126	297	Flavobacterium araucananum DSM 24704	NZ_QGGJ01000002.1	992505	995687	+	WP_089480504.1	286-352: cd00063 (FN3, Fibronectin type 3 domain; One of three types of internal repeats found in the plasma protein fibronectin.); 27-155: TIGR02542 (T_forsyth_147, TANFOR domain.)	Neg: SP(Sec/SPI) (Pr: 0.956), Pos: SP(Sec/SPI) (Pr: 0.765)	0 Y n8-18c22/23o	1060					0	0	WP_089480505.1			0 0 o	145	0	WP_089480506.1	38-188: COG0664 (Crp, cAMP-binding domain of CRP or a regulatory subunit of cAMP-dependent protein kinases [Signal transduction mechanisms].)		0 0 o	194	354	TANFOR	27	155	2.22e-12
127	293	Fulvivirga imtechensis AK7	NZ_AMZN01000008.1	84327	89450	+	WP_009578236.1	25-156: TIGR02542 (T_forsyth_147, TANFOR domain.); 292-376: cd00063 (FN3, Fibronectin type 3 domain; One of three types of internal repeats found in the plasma protein fibronectin.)	Neg: LIPO(Sec/SPII) (Pr: 0.523), Pos: SP(Sec/SPI) (Pr: 0.793)	0 Y n5-16c20/21o	1707	WP_009578235.1	5-118: TIGR04256 (GxxExxY, GxxExxY protein.)		0 0 o	135	20	WP_040495490.1		Neg: SP(Sec/SPI) (Pr: 0.961), Pos: SP(Sec/SPI) (Pr: 0.837)	0 Y n5-16c20/21o	586	3	WP_009578238.1		Neg: SP(Sec/SPI) (Pr: 0.995), Pos: SP(Sec/SPI) (Pr: 0.847)	0 Y n4-12c18/19o	211	2	TANFOR	25	156	1.53e-13
128	291	Muricauda beolgyonensis KCTC 23501	NZ_RZMY01000006.1	75404	77794	-	WP_127019164.1			1 0 i47-65o	796	WP_127019166.1	7-114: cd16377 (23S_rRNA_IVP_like, 23S rRNA-intervening sequence protein and similar proteins.)		0 0 i	121	-4	WP_127019162.1		Neg: SP(Sec/SPI) (Pr: 0.927), Pos: SP(Sec/SPI) (Pr: 0.671)	0 Y n4-14c18/19o	523	3	WP_127019160.1		Neg: LIPO(Sec/SPII) (Pr: 0.895), Pos: LIPO(Sec/SPII) (Pr: 0.931)	0 Y n14-25c29/30o	262	-17	TANFOR	67	200	4.71e-09
129	299	Muricauda taeanensis JCM 17757	NZ_QXFO01000018.1	300577	302760	+	WP_119619284.1			0 0 o	727	WP_119619283.1		Neg: LIPO(Sec/SPII) (Pr: 0.984), Pos: LIPO(Sec/SPII) (Pr: 0.922)	0 Y n9-20c25/26o	451	149	WP_119619285.1		Neg: SP(Sec/SPI) (Pr: 0.968), Pos: SP(Sec/SPI) (Pr: 0.741)	0 Y n4-14c18/19o	498	2	WP_119619286.1		Neg: LIPO(Sec/SPII) (Pr: 0.999), Pos: LIPO(Sec/SPII) (Pr: 0.996)	0 Y n7-16c20/21o	208	10	TANFOR	13	146	4.68e-09
130	182	Cellulophaga fucicola DSM 24786	NZ_FPIY01000001.1	857480	864376	+	WP_072302419.1	1987-2298: BaCT; 319-389: pfam16656 (Pur_ac_phosph_N, Purple acid Phosphatase, N-terminal domain.)	Neg: SP(Sec/SPI) (Pr: 0.813), Pos: SP(Sec/SPI) (Pr: 0.917)	0 Y n21-32c39/40o	2298	WP_084639105.1	120-279: COG3291 (COG3291, PKD repeat [Function unknown].)	Neg: LIPO(Sec/SPII) (Pr: 0.988), Pos: LIPO(Sec/SPII) (Pr: 0.986)	0 Y n8-19c24/25o	455	1	WP_072302420.1			0 0 o	356	0	WP_072302421.1		Neg: SP(Sec/SPI) (Pr: 0.890), Pos: SP(Sec/SPI) (Pr: 0.551)	0 Y n5-15c19/20o	285	38	TANFOR	49	167	3.72e-10
131	58	Flavobacterium hydatis DSM 2063	NZ_JPRM01000008.1	62896	68421	-	WP_081912444.1	1542-1841: BaCT; 33-166: TIGR02542 (T_forsyth_147, TANFOR domain.); 292-358: cd00063 (FN3, Fibronectin type 3 domain; One of three types of internal repeats found in the plasma protein fibronectin.)	Neg: LIPO(Sec/SPII) (Pr: 0.615), Pos: SP(Sec/SPI) (Pr: 0.642)	0 Y n8-20c28/29o	1841	WP_081912445.1	1431-1467: pfam13573 (SprB, SprB repeat.); 410-445: pfam13573 (SprB, SprB repeat.); 1679-1753: TIGR04183 (Por_Secre_tail, Por secretion system C-terminal sorting domain.); 1356-1392: pfam13573 (SprB, SprB repeat.); 739-772: pfam13573 (SprB, SprB repeat.); 1050-1083: pfam13573 (SprB, SprB repeat.)	Neg: SP(Sec/SPI) (Pr: 0.779), Pos: SP(Sec/SPI) (Pr: 0.728)	0 Y n4-12c16/17o	1754	3	WP_035620349.1			0 0 o	358	2	WP_035620346.1		Neg: LIPO(Sec/SPII) (Pr: 0.797), Pos: SP(Sec/SPI) (Pr: 0.539)	0 Y n5-15c19/20o	278	16	TANFOR	33	166	6.04e-14
132	59	Flavobacterium hydatis ATCC 29551	NZ_MUGY01000013.1	224174	229699	+	WP_081912444.1	1542-1841: BaCT; 33-166: TIGR02542 (T_forsyth_147, TANFOR domain.); 292-358: cd00063 (FN3, Fibronectin type 3 domain; One of three types of internal repeats found in the plasma protein fibronectin.)	Neg: LIPO(Sec/SPII) (Pr: 0.615), Pos: SP(Sec/SPI) (Pr: 0.642)	0 Y n8-20c28/29o	1841	WP_081912445.1	1431-1467: pfam13573 (SprB, SprB repeat.); 410-445: pfam13573 (SprB, SprB repeat.); 1679-1753: TIGR04183 (Por_Secre_tail, Por secretion system C-terminal sorting domain.); 1356-1392: pfam13573 (SprB, SprB repeat.); 739-772: pfam13573 (SprB, SprB repeat.); 1050-1083: pfam13573 (SprB, SprB repeat.)	Neg: SP(Sec/SPI) (Pr: 0.779), Pos: SP(Sec/SPI) (Pr: 0.728)	0 Y n4-12c16/17o	1754	3	WP_035620349.1			0 0 o	358	2	WP_035620346.1		Neg: LIPO(Sec/SPII) (Pr: 0.797), Pos: SP(Sec/SPI) (Pr: 0.539)	0 Y n5-15c19/20o	278	16	TANFOR	33	166	6.04e-14
133	464	Flavobacterium sp. HTF	NZ_QETH01000065.1	8915	14413	+	WP_116753619.1	1539-1827: BaCT; 28-161: TIGR02542 (T_forsyth_147, TANFOR domain.); 287-353: cd00063 (FN3, Fibronectin type 3 domain; One of three types of internal repeats found in the plasma protein fibronectin.)	Neg: SP(Sec/SPI) (Pr: 0.796), Pos: SP(Sec/SPI) (Pr: 0.691)	0 Y n8-19c23/24o	1832	WP_116753618.1	1378-1414: pfam13573 (SprB, SprB repeat.); 686-722: pfam13573 (SprB, SprB repeat.); 1626-1701: TIGR04183 (Por_Secre_tail, Por secretion system C-terminal sorting domain.); 997-1030: pfam13573 (SprB, SprB repeat.)	Neg: SP(Sec/SPI) (Pr: 0.984), Pos: SP(Sec/SPI) (Pr: 0.885)	0 Y n4-15c20/21o	1702	3	WP_116753620.1			0 0 o	353	11	WP_116753621.1		Neg: LIPO(Sec/SPII) (Pr: 0.743), Pos: LIPO(Sec/SPII) (Pr: 0.567)	0 Y n12-23c28/29o	288	98	TANFOR	28	161	3.27e-13
134	527	Pseudobacter ginsenosidimutans Gsoil 221	NZ_CP042431.1	6226132	6229290	-	WP_147122351.1	28-156: TIGR02542 (T_forsyth_147, TANFOR domain.)	Neg: SP(Sec/SPI) (Pr: 0.971), Pos: SP(Sec/SPI) (Pr: 0.941)	0 Y n7-18c23/24o	1052	WP_130540479.1		Neg: LIPO(Sec/SPII) (Pr: 0.998), Pos: LIPO(Sec/SPII) (Pr: 0.999)	0 Y n4-14c19/20o	149	36	WP_147122350.1			0 0 o	366	17	WP_130540477.1	1-244: BaCT		0 0 o	252	170	TANFOR	28	156	1.05e-12
135	552	Salibacter halophilus KCTC 52047	NZ_WACR01000002.1	56980	61377	-	WP_151166343.1		Neg: SP(Sec/SPI) (Pr: 0.976), Pos: SP(Sec/SPI) (Pr: 0.991)	0 Y n7-18c26/27o	1465	WP_151166344.1		Neg: SP(Sec/SPI) (Pr: 0.531), Pos: SP(Sec/SPI) (Pr: 0.390)	0 Y n4-15c19/20o	561	5	WP_151166342.1	337-566: COG3401 (FN3, Fibronectin type 3 domain [General function prediction only].)	Neg: SP(Sec/SPI) (Pr: 0.863), Pos: SP(Sec/SPI) (Pr: 0.782)	0 Y n7-17c21/22o	666	2	WP_151166341.1	156-314: cl26890 (Collar, Phage Tail Collar Domain.)	Neg: SP(Sec/SPI) (Pr: 0.929), Pos: SP(Sec/SPI) (Pr: 0.880)	0 Y n7-18c24/25o	314	19	TANFOR	31	142	1.87e-10
136	446	Aquimarina sediminis w01	NZ_POYJ01000001.1	895609	897852	-	WP_103068649.1	37-171: TIGR02542 (T_forsyth_147, TANFOR domain.); 309-362: cl21522 (FN3, N/A.)	Neg: SP(Sec/SPI) (Pr: 0.517), Pos: SP(Sec/SPI) (Pr: 0.700)	1 0 i12-35o	747	WP_103068650.1		Neg: LIPO(Sec/SPII) (Pr: 0.898), Pos: LIPO(Sec/SPII) (Pr: 0.926)	0 Y n4-15c20/21o	151	108	WP_128755187.1		Neg: SP(Sec/SPI) (Pr: 0.915), Pos: SP(Sec/SPI) (Pr: 0.725)	0 Y n5-16c21/22o	980	269	WP_103068646.1			0 0 i	92	13	TANFOR	37	171	1.07e-15
137	177	Cellulophaga baltica 4	NZ_ATLG01000002.1	365074	367278	+	WP_034659320.1		Neg: SP(Sec/SPI) (Pr: 0.493), Pos: SP(Sec/SPI) (Pr: 0.638)	0 Y n19-28c33/34o	734	WP_051333133.1			0 0 o	808	70	WP_029447893.1	776-922: cl00173 (VIP2, N/A.)		0 0 o	950	350	WP_029447894.1			0 0 o	187	-1	TANFOR	45	183	1.44e-08
138	324	Pedobacter sp. R20-19	NZ_JCKI01000007.1	309980	310540	-	WP_029287191.1		Neg: SP(Sec/SPI) (Pr: 0.856), Pos: SP(Sec/SPI) (Pr: 0.902)	0 Y n23-34c38/39o	186	WP_029287193.1	5-221: COG3279 (LytT, DNA-binding response regulator, LytR/AlgR family [Transcription, Signal transduction mechanisms].)		0 0 o	236	583	WP_029287189.1	99-169: cd00063 (FN3, Fibronectin type 3 domain; One of three types of internal repeats found in the plasma protein fibronectin.)		0 0 o	1014	74	WP_029287188.1			0 0 o	144	5	TANFOR	43	157	1.86e-08
139	205	Capnocytophaga sp. ChDC OS43	NZ_CP022022.1	2194292	2196859	+	WP_088594358.1		Neg: SP(Sec/SPI) (Pr: 0.816), Pos: SP(Sec/SPI) (Pr: 0.718)	0 Y n3-14c19/20o	855	WP_088594357.1			0 0 o	220	109	WP_088594359.1			0 0 o	1023	-1	WP_088594360.1			0 0 o	229	-1	TANFOR	25	149	1.01e-08
140	470	Flavobacterium sp. IMCC34759	NZ_QJHK01000001.1	89937	95360	+	WP_110304710.1	33-166: TIGR02542 (T_forsyth_147, TANFOR domain.); 292-358: cd00063 (FN3, Fibronectin type 3 domain; One of three types of internal repeats found in the plasma protein fibronectin.)	Neg: LIPO(Sec/SPII) (Pr: 0.609), Pos: SP(Sec/SPI) (Pr: 0.721)	0 Y n8-20c28/29o	1807	WP_110304709.1	1375-1411: pfam13573 (SprB, SprB repeat.); 683-719: pfam13573 (SprB, SprB repeat.); 994-1027: pfam13573 (SprB, SprB repeat.); 1300-1336: pfam13573 (SprB, SprB repeat.)	Neg: SP(Sec/SPI) (Pr: 0.630), Pos: SP(Sec/SPI) (Pr: 0.504)	0 Y n6-17c22/23o	1699	2	WP_110304711.1			0 0 o	247	2	WP_110304712.1			0 Y n4-12c16/17o	332	481	TANFOR	33	166	1.97e-13
141	498	Flavobacterium sp. 270	NZ_SODM01000001.1	1679977	1683708	-	WP_134147443.1	28-161: TIGR02542 (T_forsyth_147, TANFOR domain.); 287-353: cd00063 (FN3, Fibronectin type 3 domain; One of three types of internal repeats found in the plasma protein fibronectin.)	Neg: SP(Sec/SPI) (Pr: 0.765), Pos: SP(Sec/SPI) (Pr: 0.602)	0 Y n8-19c23/24o	1243	WP_134147444.1	1381-1417: pfam13573 (SprB, SprB repeat.); 1629-1704: TIGR04183 (Por_Secre_tail, Por secretion system C-terminal sorting domain.); 1000-1033: pfam13573 (SprB, SprB repeat.); 370-407: pfam13573 (SprB, SprB repeat.); 1306-1339: pfam13573 (SprB, SprB repeat.)	Neg: SP(Sec/SPI) (Pr: 0.961), Pos: SP(Sec/SPI) (Pr: 0.957)	0 Y n4-12c18/19o	1705	2	WP_134147441.1			0 0 o	249	-1	WP_134147439.1			0 0 o	111	90	TANFOR	28	161	3.34e-13
142	280	Flavobacterium ginsenosidimutans THG 01	NZ_QJRJ01000076.1	80894	85210	-	WP_111286603.1	292-382: cd00063 (FN3, Fibronectin type 3 domain; One of three types of internal repeats found in the plasma protein fibronectin.); 33-166: TIGR02542 (T_forsyth_147, TANFOR domain.)	Neg: LIPO(Sec/SPII) (Pr: 0.823), Pos: SP(Sec/SPI) (Pr: 0.572)	0 Y n9-20c28/29o	1438	WP_111286605.1	1391-1427: pfam13573 (SprB, SprB repeat.); 700-733: pfam13573 (SprB, SprB repeat.); 1011-1044: pfam13573 (SprB, SprB repeat.); 1316-1352: pfam13573 (SprB, SprB repeat.); 1639-1713: TIGR04183 (Por_Secre_tail, Por secretion system C-terminal sorting domain.)	Neg: SP(Sec/SPI) (Pr: 0.761), Pos: SP(Sec/SPI) (Pr: 0.814)	0 Y n4-12c18/19o	1714	2	WP_111286601.1		Neg: LIPO(Sec/SPII) (Pr: 0.994), Pos: LIPO(Sec/SPII) (Pr: 0.992)	0 Y n20-30c38/39o	258	-56	WP_111286599.1			0 0 o	93	249	TANFOR	33	166	3.55e-13
143	67	Capnocytophaga sputigena ATCC 33612	NZ_ABZV01000004.1	3753	7994	-	WP_002678316.1		Neg: SP(Sec/SPI) (Pr: 0.922), Pos: SP(Sec/SPI) (Pr: 0.866)	0 Y n8-17c21/22o	1413	WP_002678306.1		Neg: SP(Sec/SPI) (Pr: 0.987), Pos: SP(Sec/SPI) (Pr: 0.845)	0 Y n4-15c19/20o	550	5	WP_081450858.1		Neg: LIPO(Sec/SPII) (Pr: 0.981), Pos: LIPO(Sec/SPII) (Pr: 0.984)	0 Y n4-14c19/20o	260	7	WP_002678363.1		Neg: LIPO(Sec/SPII) (Pr: 0.998), Pos: LIPO(Sec/SPII) (Pr: 0.999)	0 Y n4-13c18/19o	259	89	TANFOR	26	148	5.33e-09
144	68	Capnocytophaga sputigena KC1668	NZ_CP022385.1	2332099	2336340	+	WP_002678316.1		Neg: SP(Sec/SPI) (Pr: 0.922), Pos: SP(Sec/SPI) (Pr: 0.866)	0 Y n8-17c21/22o	1413	WP_002678306.1		Neg: SP(Sec/SPI) (Pr: 0.987), Pos: SP(Sec/SPI) (Pr: 0.845)	0 Y n4-15c19/20o	550	5	WP_081450858.1		Neg: LIPO(Sec/SPII) (Pr: 0.981), Pos: LIPO(Sec/SPII) (Pr: 0.984)	0 Y n4-14c19/20o	260	7	WP_002678363.1		Neg: LIPO(Sec/SPII) (Pr: 0.998), Pos: LIPO(Sec/SPII) (Pr: 0.999)	0 Y n4-13c18/19o	259	89	TANFOR	26	148	5.33e-09
145	70	Capnocytophaga sputigena NCTC11653	NZ_UAVP01000009.1	188952	193193	+	WP_002678316.1		Neg: SP(Sec/SPI) (Pr: 0.922), Pos: SP(Sec/SPI) (Pr: 0.866)	0 Y n8-17c21/22o	1413	WP_002678306.1		Neg: SP(Sec/SPI) (Pr: 0.987), Pos: SP(Sec/SPI) (Pr: 0.845)	0 Y n4-15c19/20o	550	5	WP_081450858.1		Neg: LIPO(Sec/SPII) (Pr: 0.981), Pos: LIPO(Sec/SPII) (Pr: 0.984)	0 Y n4-14c19/20o	260	7	WP_002678363.1		Neg: LIPO(Sec/SPII) (Pr: 0.998), Pos: LIPO(Sec/SPII) (Pr: 0.999)	0 Y n4-13c18/19o	259	89	TANFOR	26	148	5.33e-09
146	272	Pseudobacter ginsenosidimutans DSM 18116	NZ_SGXA01000001.1	2699023	2703300	-	WP_130540478.1	28-156: TIGR02542 (T_forsyth_147, TANFOR domain.)	Neg: SP(Sec/SPI) (Pr: 0.971), Pos: SP(Sec/SPI) (Pr: 0.941)	0 Y n7-18c23/24o	1425	WP_130540479.1		Neg: LIPO(Sec/SPII) (Pr: 0.998), Pos: LIPO(Sec/SPII) (Pr: 0.999)	0 Y n4-14c19/20o	149	36	WP_130540477.1	1-244: BaCT		0 0 o	252	170	WP_130540476.1			0 0 o	255	223	TANFOR	28	156	7.87e-13
147	274	Aquimarina macrocephali JAMB N27	NZ_JACA01000005.1	67421	72670	+	WP_024769067.1	58-198: TIGR02542 (T_forsyth_147, TANFOR domain.)		0 Y n40-48c53/54o	1749	WP_035090723.1	44-188: COG3291 (COG3291, PKD repeat [Function unknown].)	Neg: LIPO(Sec/SPII) (Pr: 0.993), Pos: LIPO(Sec/SPII) (Pr: 0.954)	0 Y n4-16c21/22o	447	-50	WP_084050138.1	61-210: cl00173 (VIP2, N/A.)		0 0 o	250	1223	WP_024769069.1			0 0 o	168	-1	TANFOR	58	198	3.31e-14
148	431	Flavobacterium sp. IR1	NZ_NQOT01000400.1	527032	529986	-	WP_095382199.1	72-191: TIGR02542 (T_forsyth_147, TANFOR domain.); 330-412: pfam16656 (Pur_ac_phosph_N, Purple acid Phosphatase, N-terminal domain.)		1 0 i39-60o	984					0	0	WP_123949263.1			0 0 o	251	17	WP_095382197.1			0 0 o	105	231	TANFOR	72	191	5e-11
149	520	Aquimarina intermedia DSM 17527	NZ_VNHU01000002.1	201928	207132	+	WP_148781584.1	24-159: TIGR02542 (T_forsyth_147, TANFOR domain.); 285-368: cd00063 (FN3, Fibronectin type 3 domain; One of three types of internal repeats found in the plasma protein fibronectin.)	Neg: SP(Sec/SPI) (Pr: 0.903), Pos: SP(Sec/SPI) (Pr: 0.798)	0 Y n5-15c19/20o	1734	WP_148781583.1		Neg: SP(Sec/SPI) (Pr: 0.853), Pos: SP(Sec/SPI) (Pr: 0.688)	0 Y n4-14c18/19o	813	25	WP_148781926.1	18-212: pfam04493 (Endonuclease_5, Endonuclease V.)		0 0 o	236	553	WP_148781585.1	4-164: cl00848 (Y1_Tnp, Transposase IS200 like.)		0 0 i	188	71	TANFOR	24	159	1.85e-11
150	324	Pedobacter sp. R20-19	NZ_JCKI01000005.1	126485	131689	+	WP_082468391.1	386-456: cd00063 (FN3, Fibronectin type 3 domain; One of three types of internal repeats found in the plasma protein fibronectin.)		0 0 o	1734	WP_029285884.1	1033-1066: pfam13573 (SprB, SprB repeat.); 954-990: pfam13573 (SprB, SprB repeat.)	Neg: SP(Sec/SPI) (Pr: 0.997), Pos: SP(Sec/SPI) (Pr: 0.996)	0 Y n12-23c29/30o	1356	323	WP_029285888.1			0 0 o	227	-1	WP_029285890.1			0 0 o	200	99	TANFOR	120	250	6.08e-10
151	205	Capnocytophaga sp. ChDC OS43	NZ_CP022022.1	2184699	2190464	+	WP_088594356.1	1651-1920: BaCT	Neg: SP(Sec/SPI) (Pr: 0.816), Pos: SP(Sec/SPI) (Pr: 0.718)	0 Y n3-14c19/20o	1921					0	5	WP_088595304.1			0 0 o	223	432					0	69	TANFOR	25	149	7.22e-09
152	51	Flavobacterium johnsoniae CI04	NZ_MLFK01000006.1	252805	258165	+	WP_083572210.1	286-353: cd00063 (FN3, Fibronectin type 3 domain; One of three types of internal repeats found in the plasma protein fibronectin.); 28-161: TIGR02542 (T_forsyth_147, TANFOR domain.)	Neg: SP(Sec/SPI) (Pr: 0.806), Pos: SP(Sec/SPI) (Pr: 0.592)	0 Y n8-19c23/24o	1786	WP_083572209.1	1369-1404: pfam13573 (SprB, SprB repeat.); 988-1022: pfam13573 (SprB, SprB repeat.); 1617-1693: TIGR04183 (Por_Secre_tail, Por secretion system C-terminal sorting domain.); 1294-1330: pfam13573 (SprB, SprB repeat.); 676-711: pfam13573 (SprB, SprB repeat.)	Neg: SP(Sec/SPI) (Pr: 0.914), Pos: SP(Sec/SPI) (Pr: 0.746)	0 Y n4-15c20/21o	1693	4	WP_071636543.1			0 0 o	232	3	WP_071636544.1			0 0 o	146	91	TANFOR	28	161	5.91e-12
153	318	Aquimarina sp. Aq349 Aquimarina sp. strain Aq349	NZ_OMKB01000014.1	770531	773398	+	WP_108808741.1	41-175: TIGR02542 (T_forsyth_147, TANFOR domain.); 329-386: pfam16656 (Pur_ac_phosph_N, Purple acid Phosphatase, N-terminal domain.)	Neg: SP(Sec/SPI) (Pr: 0.880), Pos: SP(Sec/SPI) (Pr: 0.863)	0 Y n22-31c36/37o	955	WP_108808740.1	51-260: COG3291 (COG3291, PKD repeat [Function unknown].)	Neg: LIPO(Sec/SPII) (Pr: 0.996), Pos: LIPO(Sec/SPII) (Pr: 0.963)	0 Y n4-16c21/22o	449	6	WP_074410269.1		Neg: SP(Sec/SPI) (Pr: 0.732), Pos: SP(Sec/SPI) (Pr: 0.501)	0 Y n8-17c22/23o	234	2	WP_108808742.1		Neg: SP(Sec/SPI) (Pr: 0.860), Pos: SP(Sec/SPI) (Pr: 0.863)	0 Y n11-22c26/27o	216	-7	TANFOR	41	175	2.75e-12
154	319	Aquimarina sp. Aq349 Aquimarina sp. Aq3491	NZ_UYXD01000058.1	20856	23723	-	WP_108808741.1	41-175: TIGR02542 (T_forsyth_147, TANFOR domain.); 329-386: pfam16656 (Pur_ac_phosph_N, Purple acid Phosphatase, N-terminal domain.)	Neg: SP(Sec/SPI) (Pr: 0.880), Pos: SP(Sec/SPI) (Pr: 0.863)	0 Y n22-31c36/37o	955	WP_108808740.1	51-260: COG3291 (COG3291, PKD repeat [Function unknown].)	Neg: LIPO(Sec/SPII) (Pr: 0.996), Pos: LIPO(Sec/SPII) (Pr: 0.963)	0 Y n4-16c21/22o	449	6	WP_074410269.1		Neg: SP(Sec/SPI) (Pr: 0.732), Pos: SP(Sec/SPI) (Pr: 0.501)	0 Y n8-17c22/23o	234	2	WP_132066137.1			0 0 o	174	119	TANFOR	41	175	2.75e-12
155	333	Aquimarina megaterium EL33	NZ_FLRG01000011.1	60132	62987	-	WP_074410270.1	37-171: TIGR02542 (T_forsyth_147, TANFOR domain.); 325-382: pfam16656 (Pur_ac_phosph_N, Purple acid Phosphatase, N-terminal domain.)	Neg: SP(Sec/SPI) (Pr: 0.926), Pos: SP(Sec/SPI) (Pr: 0.880)	0 Y n18-27c32/33o	951	WP_074410271.1	51-260: COG3291 (COG3291, PKD repeat [Function unknown].)	Neg: LIPO(Sec/SPII) (Pr: 0.996), Pos: LIPO(Sec/SPII) (Pr: 0.963)	0 Y n4-16c21/22o	449	18	WP_074410269.1		Neg: SP(Sec/SPI) (Pr: 0.732), Pos: SP(Sec/SPI) (Pr: 0.501)	0 Y n8-17c22/23o	234	2	WP_074410268.1		Neg: SP(Sec/SPI) (Pr: 0.859), Pos: SP(Sec/SPI) (Pr: 0.862)	0 Y n11-22c26/27o	216	-7	TANFOR	37	171	1.78e-11
156	281	Ohtaekwangia koreensis DSM 25262	NZ_FUZU01000001.1	1267080	1273301	+	WP_079685666.1	1933-2062: cl00089 (NUC, N/A.); 293-375: cd00063 (FN3, Fibronectin type 3 domain; One of three types of internal repeats found in the plasma protein fibronectin.); 26-162: TIGR02542 (T_forsyth_147, TANFOR domain.)	Neg: SP(Sec/SPI) (Pr: 0.963), Pos: SP(Sec/SPI) (Pr: 0.899)	0 Y n6-16c21/22o	2073	WP_079685665.1		Neg: SP(Sec/SPI) (Pr: 0.940), Pos: SP(Sec/SPI) (Pr: 0.765)	0 Y n4-15c20/21o	573	63	WP_079685667.1			0 0 o	230	3	WP_079685668.1		Pos: SP(Sec/SPI) (Pr: 0.693)	0 Y n18-28c33/34o	320	-23	TANFOR	26	162	6.77e-16
157	336	Cellulophaga sp. E6(2014)	NZ_JQCT01000025.1	127478	133426	+	WP_034668401.1		Neg: SP(Sec/SPI) (Pr: 0.505), Pos: SP(Sec/SPI) (Pr: 0.630)	0 Y n19-28c33/34o	1982	WP_052085227.1			0 0 o	808	118	WP_034668403.1			0 0 o	231	4	WP_034668406.1	14-120: cl00516 (Restriction_endonuclease_like, N/A.)		0 0 i	131	291	TANFOR	45	183	1.52e-08
158	443	Tenacibaculum sp. Bg11-29	NZ_PJBB01000003.1	3338715	3345035	-	WP_101045992.1	290-356: cd00063 (FN3, Fibronectin type 3 domain; One of three types of internal repeats found in the plasma protein fibronectin.)	Neg: SP(Sec/SPI) (Pr: 0.617), Pos: SP(Sec/SPI) (Pr: 0.645)	0 Y n14-22c28/29o	2106	WP_101045993.1	55-276: TIGR00864 (PCC, polycystin cation channel protein.)	Neg: LIPO(Sec/SPII) (Pr: 0.947), Pos: LIPO(Sec/SPII) (Pr: 0.845)	0 Y n4-12c16/17o	450	13	WP_101045991.1			0 0 o	263	10					0	105	TANFOR	38	167	1.12e-08
159	431	Flavobacterium sp. IR1	NZ_NQOT01000408.1	195026	200629	-	WP_095382532.1	1577-1867: BaCT; 42-160: TIGR02542 (T_forsyth_147, TANFOR domain.)	Neg: SP(Sec/SPI) (Pr: 0.818), Pos: SP(Sec/SPI) (Pr: 0.927)	0 Y n8-19c28/29o	1867	WP_095382533.1	1032-1107: TIGR04183 (Por_Secre_tail, Por secretion system C-terminal sorting domain.); 784-819: pfam13573 (SprB, SprB repeat.); 708-744: pfam13573 (SprB, SprB repeat.)	Neg: SP(Sec/SPI) (Pr: 0.956), Pos: SP(Sec/SPI) (Pr: 0.863)	0 Y n4-13c18/19o	1108	2	WP_095382531.1			0 0 o	326	-1	WP_095382530.1	1-97: BaCT		0 0 o	98	209	TANFOR	42	160	7.21e-11
160	63	Bergeyella zoohelcum ATCC 43767	NZ_JH932293.1	1575467	1580959	-	WP_002663705.1	1548-1829: BaCT; 313-378: cd00063 (FN3, Fibronectin type 3 domain; One of three types of internal repeats found in the plasma protein fibronectin.)	Neg: SP(Sec/SPI) (Pr: 0.540), Pos: SP(Sec/SPI) (Pr: 0.640)	0 Y n20-31c38/39o	1830	WP_002663707.1		Neg: SP(Sec/SPI) (Pr: 0.934), Pos: SP(Sec/SPI) (Pr: 0.717)	0 Y n8-16c21/22o	1566	54	WP_002663703.1			0 0 o	322	7	WP_081580588.1			0 0 i	81	-46	TANFOR	43	178	9.48e-08
161	222	Niastella koreensis GR20-10	NC_016609.1	2100187	2104500	+	WP_014217983.1	33-156: TIGR02542 (T_forsyth_147, TANFOR domain.); 295-370: pfam00041 (fn3, Fibronectin type III domain.)	Neg: SP(Sec/SPI) (Pr: 0.947), Pos: SP(Sec/SPI) (Pr: 0.887)	0 Y n7-18c23/24o	1437	WP_014217982.1		Neg: LIPO(Sec/SPII) (Pr: 0.999), Pos: LIPO(Sec/SPII) (Pr: 0.999)	0 Y n4-15c22/23o	140	63	WP_014217984.1	27-321: BaCT	Neg: SP(Sec/SPI) (Pr: 0.709), Pos: SP(Sec/SPI) (Pr: 0.709)	0 Y n8-18c23/24o	323	11	WP_014217985.1			0 0 o	340	-1	TANFOR	33	156	5.03e-14
162	223	Niastella koreensis DSM 17620	NZ_LWBO01000077.1	30120	34433	-	WP_014217983.1	33-156: TIGR02542 (T_forsyth_147, TANFOR domain.); 295-370: pfam00041 (fn3, Fibronectin type III domain.)	Neg: SP(Sec/SPI) (Pr: 0.947), Pos: SP(Sec/SPI) (Pr: 0.887)	0 Y n7-18c23/24o	1437	WP_014217982.1		Neg: LIPO(Sec/SPII) (Pr: 0.999), Pos: LIPO(Sec/SPII) (Pr: 0.999)	0 Y n4-15c22/23o	140	63	WP_014217984.1	27-321: BaCT	Neg: SP(Sec/SPI) (Pr: 0.709), Pos: SP(Sec/SPI) (Pr: 0.709)	0 Y n8-18c23/24o	323	11	WP_014217985.1			0 0 o	340	-1	TANFOR	33	156	5.03e-14
163	301	Chryseobacterium viscerum 687B-08	NZ_PPEG02000009.1	203781	209633	+	WP_103233658.1	1637-1949: BaCT	Pos: SP(Sec/SPI) (Pr: 0.680)	0 Y n28-38c45/46o	1950					0	62	WP_109739057.1			1 0 o279-298i	343	1	WP_109739058.1			1 0 o270-290i	333	96	TANFOR	56	187	1.22e-08
164	54	Flavobacterium johnsoniae DSM 6792	NZ_FQWH01000001.1	29449	32529	-	WP_073407729.1	28-161: TIGR02542 (T_forsyth_147, TANFOR domain.); 287-377: cd00063 (FN3, Fibronectin type 3 domain; One of three types of internal repeats found in the plasma protein fibronectin.)	Neg: SP(Sec/SPI) (Pr: 0.817), Pos: SP(Sec/SPI) (Pr: 0.661)	0 Y n7-17c25/26o	1026	WP_073407730.1	1386-1421: pfam13573 (SprB, SprB repeat.); 1634-1709: TIGR04183 (Por_Secre_tail, Por secretion system C-terminal sorting domain.); 362-397: pfam13573 (SprB, SprB repeat.)	Neg: SP(Sec/SPI) (Pr: 0.810), Pos: SP(Sec/SPI) (Pr: 0.928)	0 Y n4-15c20/21o	1710	1	WP_073407728.1		Neg: SP(Sec/SPI) (Pr: 0.686)	0 Y n4-12c17/18o	345	5	WP_073407727.1		Neg: SP(Sec/SPI) (Pr: 0.932), Pos: SP(Sec/SPI) (Pr: 0.547)	0 Y n7-18c22/23o	281	123	TANFOR	28	161	3.99e-13
165	442	Olleya sp. Bg11-27	NZ_CP025117.1	2426721	2432564	+	WP_101018251.1	1646-1947: BaCT; 284-369: cd00063 (FN3, Fibronectin type 3 domain; One of three types of internal repeats found in the plasma protein fibronectin.)	Neg: SP(Sec/SPI) (Pr: 0.973), Pos: SP(Sec/SPI) (Pr: 0.910)	0 Y n4-15c19/20o	1947	WP_101018250.1		Neg: SP(Sec/SPI) (Pr: 0.911), Pos: SP(Sec/SPI) (Pr: 0.626)	0 Y n5-15c19/20o	829	92	WP_101018252.1			0 0 o	343	1					0	99	TANFOR	24	154	4.77e-09
166	14	Myroides odoratus DSM 2801	NZ_CM001437.1	3453160	3457635	+	WP_002991499.1	1286-1470: BaCT; 16-144: TIGR02542 (T_forsyth_147, TANFOR domain.)		0 0 o	1491	WP_002991498.1		Neg: SP(Sec/SPI) (Pr: 0.988), Pos: SP(Sec/SPI) (Pr: 0.958)	0 Y n4-16c21/22o	1550	113	WP_002991500.1			0 0 o	336	10	WP_002991501.1			0 0 o	78	439	TANFOR	16	144	2.72e-11
167	15	Myroides odoratus NCTC11036	NZ_UGQN01000001.1	2807796	2812271	+	WP_002991499.1	1286-1470: BaCT; 16-144: TIGR02542 (T_forsyth_147, TANFOR domain.)		0 0 o	1491	WP_002991498.1		Neg: SP(Sec/SPI) (Pr: 0.988), Pos: SP(Sec/SPI) (Pr: 0.958)	0 Y n4-16c21/22o	1550	113	WP_002991500.1			0 0 o	336	10	WP_002991501.1			0 0 o	78	439	TANFOR	16	144	2.72e-11
168	490	Empedobacter sp. MRS2	NZ_SRPE01000008.1	82767	87338	+	WP_135836054.1		Neg: SP(Sec/SPI) (Pr: 0.804), Pos: SP(Sec/SPI) (Pr: 0.637)	0 Y n10-19c24/25o	1523	WP_135836053.1	111-229: cl00721 (DDE_Tnp_IS1, IS1 transposase.); 17-92: COG3677 (InsA, Transposase [Mobilome: prophages, transposons].)		0 0 o	232	18	WP_135836055.1	24-313: BaCT	Neg: SP(Sec/SPI) (Pr: 0.745), Pos: SP(Sec/SPI) (Pr: 0.690)	0 Y n4-16c22/23o	313	2	WP_135836056.1			0 0 o	333	-1	TANFOR	29	166	8.48e-10
169	260	Aquimarina spongiae DSM 22623	NZ_FQYP01000009.1	153313	158808	-	WP_073320022.1	314-371: pfam16656 (Pur_ac_phosph_N, Purple acid Phosphatase, N-terminal domain.)	Neg: SP(Sec/SPI) (Pr: 0.951), Pos: SP(Sec/SPI) (Pr: 0.787)	0 Y n7-17c21/22o	1831	WP_073320025.1	43-278: COG3291 (COG3291, PKD repeat [Function unknown].)	Neg: LIPO(Sec/SPII) (Pr: 0.960), Pos: LIPO(Sec/SPII) (Pr: 0.901)	0 Y n3-13c18/19o	449	31	WP_084549632.1	149-230: pfam14021 (TNT, Tuberculosis necrotizing toxin.)		0 0 o	278	282	WP_073320016.1			0 0 i	141	2	TANFOR	31	156	2.94e-09
170	156	Gelidibacter algens ACAM 536	NZ_LZRN01000026.1	1002	6443	-	WP_066435313.1		Neg: SP(Sec/SPI) (Pr: 0.967), Pos: SP(Sec/SPI) (Pr: 0.978)	0 Y n27-38c43/44o	1813	WP_066435316.1	44-267: COG3291 (COG3291, PKD repeat [Function unknown].)	Neg: LIPO(Sec/SPII) (Pr: 0.997), Pos: LIPO(Sec/SPII) (Pr: 0.995)	0 Y n8-19c24/25o	454	80	WP_066435310.1			0 0 o	287	83					0	0	TANFOR	50	171	1.06e-08
171	322	Aquimarina sp. MAR_2010_214 Mar_2010_214	NZ_PJMS01000001.1	1485172	1490655	-	WP_101446855.1	286-368: cd00063 (FN3, Fibronectin type 3 domain; One of three types of internal repeats found in the plasma protein fibronectin.)	Neg: SP(Sec/SPI) (Pr: 0.959), Pos: SP(Sec/SPI) (Pr: 0.938)	0 Y n4-14c19/20o	1827	WP_101446857.1		Neg: LIPO(Sec/SPII) (Pr: 0.717), Pos: SP(Sec/SPI) (Pr: 0.569)	0 Y n5-15c20/21o	828	28	WP_101446853.1			0 0 o	275	-41	WP_101446851.1			0 0 i	130	5	TANFOR	24	159	5.46e-08
172	326	Flavobacterium sp. URHB0058	NZ_AUEU01000007.1	15708	20126	-	WP_026982765.1	1335-1471: PoNe; 29-157: TIGR02542 (T_forsyth_147, TANFOR domain.); 288-378: cd00063 (FN3, Fibronectin type 3 domain; One of three types of internal repeats found in the plasma protein fibronectin.)	Neg: SP(Sec/SPI) (Pr: 0.943), Pos: SP(Sec/SPI) (Pr: 0.850)	0 Y n8-19c24/25o	1472	WP_051239155.1	1368-1404: pfam13573 (SprB, SprB repeat.); 1616-1690: TIGR04183 (Por_Secre_tail, Por secretion system C-terminal sorting domain.); 987-1020: pfam13573 (SprB, SprB repeat.); 676-712: pfam13573 (SprB, SprB repeat.); 1293-1329: pfam13573 (SprB, SprB repeat.)	Neg: SP(Sec/SPI) (Pr: 0.970), Pos: SP(Sec/SPI) (Pr: 0.940)	0 Y n4-15c20/21o	1691	3	WP_026982764.1	138-252: pfam08929 (DUF1911, Domain of unknown function (DUF1911).); 2-128: pfam08928 (DUF1910, Domain of unknown function (DUF1910).)		0 0 o	269	2	WP_026982763.1	121-322: pfam01609 (DDE_Tnp_1, Transposase DDE domain.)		0 0 o	440	90	TANFOR	29	157	1.11e-11
173	539	Aquimarina algiphila M91	NZ_VLNR01000072.1	6794	12295	-	WP_143918363.1	26-160: TIGR02542 (T_forsyth_147, TANFOR domain.)	Neg: SP(Sec/SPI) (Pr: 0.800), Pos: SP(Sec/SPI) (Pr: 0.672)	1 Y n8-18c25/26o1663-1684i	1833	WP_143918364.1	44-278: COG3291 (COG3291, PKD repeat [Function unknown].)	Neg: LIPO(Sec/SPII) (Pr: 0.987), Pos: LIPO(Sec/SPII) (Pr: 0.927)	0 Y n7-17c21/22o	449	33	WP_143918362.1		Neg: SP(Sec/SPI) (Pr: 0.920), Pos: LIPO(Sec/SPII) (Pr: 0.480)	0 Y n4-14c19/20o	270	23	WP_143918361.1			0 0 i	140	4	TANFOR	26	160	3.04e-12
174	200	Tenacibaculum maritimum NCIMB 2154 NCIMB 2154T	NZ_LT634361.1	1072153	1075131	+	WP_100210932.1	70-211: TIGR02542 (T_forsyth_147, TANFOR domain.)		0 Y n49-60c65/66o	992					0	0	WP_100210933.1		Neg: LIPO(Sec/SPII) (Pr: 0.844), Pos: LIPO(Sec/SPII) (Pr: 0.918)	0 Y n7-16c20/21o	306	10	WP_100210934.1			0 0 o	358	413	TANFOR	70	211	2.55e-11
175	368	Flavobacterium sp. VMW	NZ_LHVT01000024.1	257124	260861	-	WP_053473671.1	28-160: TIGR02542 (T_forsyth_147, TANFOR domain.); 286-376: cd00063 (FN3, Fibronectin type 3 domain; One of three types of internal repeats found in the plasma protein fibronectin.)	Neg: SP(Sec/SPI) (Pr: 0.939), Pos: SP(Sec/SPI) (Pr: 0.822)	0 Y n8-19c23/24o	1245	WP_053473672.1	1376-1412: pfam13573 (SprB, SprB repeat.); 996-1029: pfam13573 (SprB, SprB repeat.); 1301-1337: pfam13573 (SprB, SprB repeat.); 685-716: pfam13573 (SprB, SprB repeat.); 1624-1698: TIGR04183 (Por_Secre_tail, Por secretion system C-terminal sorting domain.)	Neg: SP(Sec/SPI) (Pr: 0.773), Pos: SP(Sec/SPI) (Pr: 0.804)	0 Y n4-12c18/19o	1699	3	WP_053473670.1		Neg: LIPO(Sec/SPII) (Pr: 0.999), Pos: LIPO(Sec/SPII) (Pr: 0.994)	0 Y n8-18c22/23o	301	-17	WP_123959114.1			1 0 i7-31o	155	113	TANFOR	28	160	8.38e-14
176	369	Flavobacterium sp. NLM	NZ_LIAC01000003.1	115387	119124	+	WP_053473671.1	28-160: TIGR02542 (T_forsyth_147, TANFOR domain.); 286-376: cd00063 (FN3, Fibronectin type 3 domain; One of three types of internal repeats found in the plasma protein fibronectin.)	Neg: SP(Sec/SPI) (Pr: 0.939), Pos: SP(Sec/SPI) (Pr: 0.822)	0 Y n8-19c23/24o	1245	WP_053473672.1	1376-1412: pfam13573 (SprB, SprB repeat.); 996-1029: pfam13573 (SprB, SprB repeat.); 1301-1337: pfam13573 (SprB, SprB repeat.); 685-716: pfam13573 (SprB, SprB repeat.); 1624-1698: TIGR04183 (Por_Secre_tail, Por secretion system C-terminal sorting domain.)	Neg: SP(Sec/SPI) (Pr: 0.773), Pos: SP(Sec/SPI) (Pr: 0.804)	0 Y n4-12c18/19o	1699	3	WP_053473670.1		Neg: LIPO(Sec/SPII) (Pr: 0.999), Pos: LIPO(Sec/SPII) (Pr: 0.994)	0 Y n8-18c22/23o	301	-17	WP_123959114.1			1 0 i7-31o	155	113	TANFOR	28	160	8.38e-14
177	463	Flavobacterium sp. WLB	NZ_QCWV01000029.1	981	4718	-	WP_053473671.1	28-160: TIGR02542 (T_forsyth_147, TANFOR domain.); 286-376: cd00063 (FN3, Fibronectin type 3 domain; One of three types of internal repeats found in the plasma protein fibronectin.)	Neg: SP(Sec/SPI) (Pr: 0.939), Pos: SP(Sec/SPI) (Pr: 0.822)	0 Y n8-19c23/24o	1245	WP_108422179.1	1376-1412: pfam13573 (SprB, SprB repeat.); 996-1029: pfam13573 (SprB, SprB repeat.); 685-716: pfam13573 (SprB, SprB repeat.); 1624-1698: TIGR04183 (Por_Secre_tail, Por secretion system C-terminal sorting domain.)	Neg: SP(Sec/SPI) (Pr: 0.773), Pos: SP(Sec/SPI) (Pr: 0.804)	0 Y n4-12c18/19o	1699	3	WP_053473670.1		Neg: LIPO(Sec/SPII) (Pr: 0.999), Pos: LIPO(Sec/SPII) (Pr: 0.994)	0 Y n8-18c22/23o	301	-17					0	0	TANFOR	28	160	8.38e-14
178	292	Chryseobacterium sp. StRB126	NZ_AP014624.1	2304115	2308641	+	WP_084220963.1		Pos: SP(Sec/SPI) (Pr: 0.803)	0 Y n19-30c37/38o	1508	WP_052480553.1		Neg: SP(Sec/SPI) (Pr: 0.987), Pos: SP(Sec/SPI) (Pr: 0.891)	0 Y n4-15c19/20o	1561	42	WP_045495631.1	26-299: BaCT	Neg: SP(Sec/SPI) (Pr: 0.537), Pos: LIPO(Sec/SPII) (Pr: 0.560)	0 Y n7-16c21/22o	299	7	WP_045495633.1			0 0 o	328	-1	TANFOR	48	179	4.34e-10
179	157	Gelidibacter algens DSM 12408	NZ_QLLQ01000018.1	318	5783	-	WP_111625982.1		Neg: SP(Sec/SPI) (Pr: 0.939), Pos: SP(Sec/SPI) (Pr: 0.947)	0 Y n35-46c51/52o	1821	WP_066435316.1	44-267: COG3291 (COG3291, PKD repeat [Function unknown].)	Neg: LIPO(Sec/SPII) (Pr: 0.997), Pos: LIPO(Sec/SPII) (Pr: 0.995)	0 Y n8-19c24/25o	454	56					0	83					0	0	TANFOR	58	179	1.07e-08
180	318	Aquimarina sp. Aq349 Aquimarina sp. strain Aq349	NZ_OMKB01000008.1	1187	7156	-	WP_074406673.1	15-155: TIGR02542 (T_forsyth_147, TANFOR domain.); 283-360: pfam16656 (Pur_ac_phosph_N, Purple acid Phosphatase, N-terminal domain.)		0 Y n2-9c14/15o	1989	WP_074406674.1	44-188: COG3291 (COG3291, PKD repeat [Function unknown].)	Neg: LIPO(Sec/SPII) (Pr: 0.991), Pos: LIPO(Sec/SPII) (Pr: 0.944)	0 Y n4-16c21/22o	447	80					0	310					0	0	TANFOR	15	155	4.23e-13
181	319	Aquimarina sp. Aq349 Aquimarina sp. Aq3491	NZ_UYXD01000026.1	1140	7145	-	WP_132065991.1	27-167: TIGR02542 (T_forsyth_147, TANFOR domain.); 295-372: pfam16656 (Pur_ac_phosph_N, Purple acid Phosphatase, N-terminal domain.)	Neg: LIPO(Sec/SPII) (Pr: 0.888), Pos: LIPO(Sec/SPII) (Pr: 0.865)	0 Y n9-20c26/27o	2001	WP_074406674.1	44-188: COG3291 (COG3291, PKD repeat [Function unknown].)	Neg: LIPO(Sec/SPII) (Pr: 0.991), Pos: LIPO(Sec/SPII) (Pr: 0.944)	0 Y n4-16c21/22o	447	44					0	310					0	0	TANFOR	27	167	4.39e-13
182	423	Flavobacterium sp. ACN2	NZ_MRCM01000019.1	442	4008	-	WP_095931245.1	292-382: cd00063 (FN3, Fibronectin type 3 domain; One of three types of internal repeats found in the plasma protein fibronectin.); 33-162: TIGR02542 (T_forsyth_147, TANFOR domain.)	Neg: LIPO(Sec/SPII) (Pr: 0.725), Pos: SP(Sec/SPI) (Pr: 0.658)	0 Y n9-20c28/29o	1188	WP_095931246.1	1432-1468: pfam13573 (SprB, SprB repeat.); 1052-1085: pfam13573 (SprB, SprB repeat.); 746-774: pfam13573 (SprB, SprB repeat.); 1680-1754: TIGR04183 (Por_Secre_tail, Por secretion system C-terminal sorting domain.); 1362-1393: pfam13573 (SprB, SprB repeat.)	Neg: SP(Sec/SPI) (Pr: 0.976), Pos: SP(Sec/SPI) (Pr: 0.891)	0 Y n4-12c18/19o	1755	2					0	1					0	0	TANFOR	33	162	5.42e-12
183	220	Niastella yeongjuensis DSM 17621	NZ_LVXG01000013.1	95197	100551	+	WP_081200095.1	32-165: TIGR02542 (T_forsyth_147, TANFOR domain.)	Neg: SP(Sec/SPI) (Pr: 0.687), Pos: SP(Sec/SPI) (Pr: 0.682)	0 Y n13-22c27/28o	1784	WP_081200093.1	672-706: pfam13573 (SprB, SprB repeat.)	Neg: SP(Sec/SPI) (Pr: 0.996), Pos: SP(Sec/SPI) (Pr: 0.974)	0 Y n5-13c21/22o	1073	33					0	0					0	0	TANFOR	32	165	1.06e-11
184	221	Niastella yeongjuensis DSM 17621	NZ_FOCZ01000015.1	74785	80139	-	WP_081200095.1	32-165: TIGR02542 (T_forsyth_147, TANFOR domain.)	Neg: SP(Sec/SPI) (Pr: 0.687), Pos: SP(Sec/SPI) (Pr: 0.682)	0 Y n13-22c27/28o	1784	WP_081200093.1	672-706: pfam13573 (SprB, SprB repeat.)	Neg: SP(Sec/SPI) (Pr: 0.996), Pos: SP(Sec/SPI) (Pr: 0.974)	0 Y n5-13c21/22o	1073	33					0	0					0	0	TANFOR	32	165	1.06e-11
185	90	Tannerella forsythia ATCC 43037	NZ_JUET01000070.1	110762	119998	-	WP_052449025.1	214-358: TIGR02542 (T_forsyth_147, TANFOR domain.); 361-505: TIGR02542 (T_forsyth_147, TANFOR domain.); 508-652: TIGR02542 (T_forsyth_147, TANFOR domain.); 72-211: TIGR02542 (T_forsyth_147, TANFOR domain.); 2047-2090: pfam13620 (CarboxypepD_reg, Carboxypeptidase regulatory-like domain.)	Neg: SP(Sec/SPI) (Pr: 0.632), Pos: SP(Sec/SPI) (Pr: 0.744)	1 0 i35-54o	3078	WP_046825218.1			0 0 o	548	-17	WP_046825215.1	1-119: cl00516 (Restriction_endonuclease_like, N/A.)		0 0 o	143	276	WP_046825214.1		Neg: SP(Sec/SPI) (Pr: 0.950), Pos: SP(Sec/SPI) (Pr: 0.876)	0 Y n7-17c22/23o	665	81	TANFOR, TANFOR, TANFOR, TANFOR	72	652	1.61e-92, 6.08e-90, 1.18e-88, 5.04e-26
186	92	Tannerella forsythia 3313	NZ_AP013044.1	600082	609345	-	WP_081094362.1	185-329: TIGR02542 (T_forsyth_147, TANFOR domain.); 332-476: TIGR02542 (T_forsyth_147, TANFOR domain.); 479-623: TIGR02542 (T_forsyth_147, TANFOR domain.); 35-182: TIGR02542 (T_forsyth_147, TANFOR domain.); 2025-2068: pfam13620 (CarboxypepD_reg, Carboxypeptidase regulatory-like domain.)	Neg: SP(Sec/SPI) (Pr: 0.876), Pos: SP(Sec/SPI) (Pr: 0.799)	0 Y n14-25c30/31o	3087	WP_041590599.1			0 0 o	548	-17	WP_081094361.1	7-119: cl00516 (Restriction_endonuclease_like, N/A.)		0 0 o	157	276	WP_060827311.1		Neg: SP(Sec/SPI) (Pr: 0.839), Pos: SP(Sec/SPI) (Pr: 0.837)	0 Y n26-36c41/42o	683	-20	TANFOR, TANFOR, TANFOR, TANFOR	35	623	3.30e-97, 1.58e-96, 9.18e-94, 3.12e-78
187	93	Tannerella forsythia 9610	NZ_MEHX01000008.1	21963	31229	+	WP_075588662.1	185-329: TIGR02542 (T_forsyth_147, TANFOR domain.); 332-476: TIGR02542 (T_forsyth_147, TANFOR domain.); 479-623: TIGR02542 (T_forsyth_147, TANFOR domain.); 35-182: TIGR02542 (T_forsyth_147, TANFOR domain.); 2029-2072: pfam13620 (CarboxypepD_reg, Carboxypeptidase regulatory-like domain.)	Neg: SP(Sec/SPI) (Pr: 0.876), Pos: SP(Sec/SPI) (Pr: 0.799)	0 Y n14-25c30/31o	3088	WP_041590599.1			0 0 o	548	-17	WP_075588663.1	1-119: cl00516 (Restriction_endonuclease_like, N/A.)		0 0 o	143	272	WP_075588664.1			0 0 o	644	140	TANFOR, TANFOR, TANFOR, TANFOR	35	623	1.90e-97, 2.55e-96, 5.60e-94, 1.87e-78
188	94	Tannerella forsythia WW11663	NZ_NSLJ01000002.1	139107	148376	-	WP_097530795.1	185-329: TIGR02542 (T_forsyth_147, TANFOR domain.); 332-476: TIGR02542 (T_forsyth_147, TANFOR domain.); 479-623: TIGR02542 (T_forsyth_147, TANFOR domain.); 35-182: TIGR02542 (T_forsyth_147, TANFOR domain.); 2020-2063: pfam13620 (CarboxypepD_reg, Carboxypeptidase regulatory-like domain.)	Neg: SP(Sec/SPI) (Pr: 0.876), Pos: SP(Sec/SPI) (Pr: 0.799)	0 Y n14-25c30/31o	3089	WP_041590599.1			0 0 o	548	-17	WP_081094361.1	7-119: cl00516 (Restriction_endonuclease_like, N/A.)		0 0 o	157	277	WP_097530794.1			0 0 o	644	96	TANFOR, TANFOR, TANFOR, TANFOR	35	623	1.49e-97, 2.00e-96, 4.53e-94, 1.53e-78
189	97	Tannerella forsythia ATCC 43037	NZ_VFJI01000001.1	729238	738474	-	WP_052449025.1	214-358: TIGR02542 (T_forsyth_147, TANFOR domain.); 361-505: TIGR02542 (T_forsyth_147, TANFOR domain.); 508-652: TIGR02542 (T_forsyth_147, TANFOR domain.); 72-211: TIGR02542 (T_forsyth_147, TANFOR domain.); 2047-2090: pfam13620 (CarboxypepD_reg, Carboxypeptidase regulatory-like domain.)	Neg: SP(Sec/SPI) (Pr: 0.632), Pos: SP(Sec/SPI) (Pr: 0.744)	1 0 i35-54o	3078	WP_140230601.1		Neg: SP(Sec/SPI) (Pr: 0.993), Pos: SP(Sec/SPI) (Pr: 0.891)	0 Y n4-11c19/20o	560	-17	WP_046825215.1	1-119: cl00516 (Restriction_endonuclease_like, N/A.)		0 0 o	143	276	WP_046825214.1		Neg: SP(Sec/SPI) (Pr: 0.950), Pos: SP(Sec/SPI) (Pr: 0.876)	0 Y n7-17c22/23o	665	81	TANFOR, TANFOR, TANFOR, TANFOR	72	652	1.61e-92, 6.08e-90, 1.18e-88, 5.04e-26
190	98	Tannerella forsythia UB22 UB22	NZ_FMML01000016.1	96013	105459	-	WP_074451455.1	185-329: TIGR02542 (T_forsyth_147, TANFOR domain.); 332-476: TIGR02542 (T_forsyth_147, TANFOR domain.); 479-622: TIGR02542 (T_forsyth_147, TANFOR domain.); 35-182: TIGR02542 (T_forsyth_147, TANFOR domain.); 2046-2089: pfam13620 (CarboxypepD_reg, Carboxypeptidase regulatory-like domain.)	Neg: SP(Sec/SPI) (Pr: 0.876), Pos: SP(Sec/SPI) (Pr: 0.799)	0 Y n14-25c30/31o	3148	WP_041590599.1			0 0 o	548	-17	WP_074451454.1			0 0 o	74	637	WP_074451453.1			0 0 i	138	-53	TANFOR, TANFOR, TANFOR, TANFOR	35	622	9.29e-98, 1.21e-96, 4.94e-94, 9.59e-79
191	99	Tannerella forsythia UB4 UB4	NZ_FMMN01000018.1	113859	123125	-	WP_074452778.1	185-329: TIGR02542 (T_forsyth_147, TANFOR domain.); 332-476: TIGR02542 (T_forsyth_147, TANFOR domain.); 479-622: TIGR02542 (T_forsyth_147, TANFOR domain.); 35-182: TIGR02542 (T_forsyth_147, TANFOR domain.); 2071-2114: pfam13620 (CarboxypepD_reg, Carboxypeptidase regulatory-like domain.)	Neg: SP(Sec/SPI) (Pr: 0.876), Pos: SP(Sec/SPI) (Pr: 0.799)	0 Y n14-25c30/31o	3088	WP_074452779.1			0 0 o	548	-17	WP_074452777.1			0 0 o	67	691	WP_060831757.1	9-97: cd10448 (GIY-YIG_unchar_3, GIY-YIG domain of uncharacterized hypothetical protein found in bacteria.)		0 0 o	101	161	TANFOR, TANFOR, TANFOR, TANFOR	35	622	2.83e-97, 9.20e-93, 1.76e-91, 2.65e-78
192	89	Tannerella forsythia 92A2	NC_016610.1	613745	623035	-	WP_080561763.1	185-329: TIGR02542 (T_forsyth_147, TANFOR domain.); 332-476: TIGR02542 (T_forsyth_147, TANFOR domain.); 479-623: TIGR02542 (T_forsyth_147, TANFOR domain.); 35-182: TIGR02542 (T_forsyth_147, TANFOR domain.); 2032-2075: pfam13620 (CarboxypepD_reg, Carboxypeptidase regulatory-like domain.)	Neg: SP(Sec/SPI) (Pr: 0.876), Pos: SP(Sec/SPI) (Pr: 0.799)	0 Y n14-25c30/31o	3096	WP_041590599.1			0 0 o	548	-17	WP_041591057.1	9-97: cd10448 (GIY-YIG_unchar_3, GIY-YIG domain of uncharacterized hypothetical protein found in bacteria.)		0 0 o	101	1220	WP_014224018.1		Neg: SP(Sec/SPI) (Pr: 0.944), Pos: SP(Sec/SPI) (Pr: 0.797)	0 Y n7-17c22/23o	664	263	TANFOR, TANFOR, TANFOR, TANFOR	35	623	7.36e-99, 2.12e-98, 1.26e-95, 1.53e-78
193	91	Tannerella forsythia KS16	NZ_AP013045.1	426811	436203	+	WP_060830694.1	361-505: TIGR02542 (T_forsyth_147, TANFOR domain.); 214-358: TIGR02542 (T_forsyth_147, TANFOR domain.); 508-651: TIGR02542 (T_forsyth_147, TANFOR domain.); 72-211: TIGR02542 (T_forsyth_147, TANFOR domain.); 2105-2148: pfam13620 (CarboxypepD_reg, Carboxypeptidase regulatory-like domain.)	Neg: SP(Sec/SPI) (Pr: 0.607), Pos: SP(Sec/SPI) (Pr: 0.727)	1 0 i35-54o	3130	WP_060830693.1		Neg: SP(Sec/SPI) (Pr: 0.732), Pos: SP(Sec/SPI) (Pr: 0.564)	0 Y n12-22c26/27o	567	-17	WP_060831757.1	9-97: cd10448 (GIY-YIG_unchar_3, GIY-YIG domain of uncharacterized hypothetical protein found in bacteria.)		0 0 o	101	846					0	-4	TANFOR, TANFOR, TANFOR, TANFOR	72	651	1.80e-97, 2.78e-97, 3.92e-91, 3.55e-25
194	95	Tannerella forsythia WW10960	NZ_NSLK01000006.1	141409	150729	-	WP_097559966.1	185-329: TIGR02542 (T_forsyth_147, TANFOR domain.); 332-476: TIGR02542 (T_forsyth_147, TANFOR domain.); 479-622: TIGR02542 (T_forsyth_147, TANFOR domain.); 35-182: TIGR02542 (T_forsyth_147, TANFOR domain.); 2082-2125: pfam13620 (CarboxypepD_reg, Carboxypeptidase regulatory-like domain.)	Neg: SP(Sec/SPI) (Pr: 0.876), Pos: SP(Sec/SPI) (Pr: 0.799)	0 Y n14-25c30/31o	3106	WP_097559967.1			0 0 o	548	-17	WP_041591057.1	9-97: cd10448 (GIY-YIG_unchar_3, GIY-YIG domain of uncharacterized hypothetical protein found in bacteria.)		0 0 o	101	970	WP_097559964.1		Neg: SP(Sec/SPI) (Pr: 0.927), Pos: SP(Sec/SPI) (Pr: 0.812)	0 Y n10-20c25/26o	667	160	TANFOR, TANFOR, TANFOR, TANFOR	35	622	2.28e-97, 2.99e-96, 2.43e-93, 2.26e-78
195	100	Tannerella forsythia UB20 UB20	NZ_FMMM01000021.1	102935	112237	-	WP_074449454.1	185-329: TIGR02542 (T_forsyth_147, TANFOR domain.); 332-476: TIGR02542 (T_forsyth_147, TANFOR domain.); 479-622: TIGR02542 (T_forsyth_147, TANFOR domain.); 35-182: TIGR02542 (T_forsyth_147, TANFOR domain.); 2075-2118: pfam13620 (CarboxypepD_reg, Carboxypeptidase regulatory-like domain.)	Neg: SP(Sec/SPI) (Pr: 0.876), Pos: SP(Sec/SPI) (Pr: 0.799)	0 Y n14-25c30/31o	3100	WP_074449455.1		Neg: SP(Sec/SPI) (Pr: 0.744), Pos: SP(Sec/SPI) (Pr: 0.574)	0 Y n11-21c25/26o	566	-17	WP_060831757.1	9-97: cd10448 (GIY-YIG_unchar_3, GIY-YIG domain of uncharacterized hypothetical protein found in bacteria.)		0 0 o	101	1337	WP_074449453.1		Neg: SP(Sec/SPI) (Pr: 0.946), Pos: SP(Sec/SPI) (Pr: 0.815)	0 Y n7-17c22/23o	664	160	TANFOR, TANFOR, TANFOR, TANFOR	35	622	2.04e-97, 2.71e-96, 2.45e-94, 2.07e-78
196	228	Dyadobacter beijingensis DSM 21582	NZ_KB907788.1	232360	239763	-	WP_019942835.1	27-168: TIGR02542 (T_forsyth_147, TANFOR domain.)	Neg: SP(Sec/SPI) (Pr: 0.992), Pos: SP(Sec/SPI) (Pr: 0.969)	0 Y n7-18c23/24o	2467	WP_051100115.1		Neg: SP(Sec/SPI) (Pr: 0.972), Pos: SP(Sec/SPI) (Pr: 0.832)	0 Y n5-15c20/21o	559	-17	WP_019942834.1	574-659: cd00063 (FN3, Fibronectin type 3 domain; One of three types of internal repeats found in the plasma protein fibronectin.)	Neg: SP(Sec/SPI) (Pr: 0.972), Pos: SP(Sec/SPI) (Pr: 0.875)	0 Y n7-18c27/28o	662	12	WP_019942833.1	129-472: COG3401 (FN3, Fibronectin type 3 domain [General function prediction only].)		0 0 o	559	79	TANFOR	27	168	3.45e-11
197	352	Dyadobacter jiangsuensis DSM 29057	NZ_PYAS01000003.1	588393	595844	+	WP_106594891.1			0 0 o	2483	WP_106594890.1			0 Y n3-11c16/17o	553	102	WP_106594892.1		Neg: SP(Sec/SPI) (Pr: 0.967), Pos: SP(Sec/SPI) (Pr: 0.963)	0 Y n11-21c30/31o	672	-1	WP_106594893.1	413-504: cd00063 (FN3, Fibronectin type 3 domain; One of three types of internal repeats found in the plasma protein fibronectin.); 320-408: cd00063 (FN3, Fibronectin type 3 domain; One of three types of internal repeats found in the plasma protein fibronectin.); 602-690: cd00063 (FN3, Fibronectin type 3 domain; One of three types of internal repeats found in the plasma protein fibronectin.); 509…	Neg: SP(Sec/SPI) (Pr: 0.609), Pos: SP(Sec/SPI) (Pr: 0.603)	0 Y n14-24c28/29o	869	27	TANFOR	4	139	1.69e-10
198	429	Larkinella knui KCTC42998	NZ_RQJP01000004.1	64714	72153	-	WP_124908201.1	32-171: TIGR02542 (T_forsyth_147, TANFOR domain.)	Neg: SP(Sec/SPI) (Pr: 0.984), Pos: SP(Sec/SPI) (Pr: 0.983)	0 Y n7-22c29/30o	2479	WP_124908202.1		Neg: SP(Sec/SPI) (Pr: 0.997), Pos: SP(Sec/SPI) (Pr: 0.981)	0 Y n4-14c19/20o	563	-17	WP_124908200.1		Neg: SP(Sec/SPI) (Pr: 0.964), Pos: SP(Sec/SPI) (Pr: 0.826)	0 Y n5-16c20/21o	668	-4	WP_124908199.1	591-680: cd00063 (FN3, Fibronectin type 3 domain; One of three types of internal repeats found in the plasma protein fibronectin.); 685-774: cd00063 (FN3, Fibronectin type 3 domain; One of three types of internal repeats found in the plasma protein fibronectin.); 495-583: cd00063 (FN3, Fibronectin type 3 domain; One of three types of internal repeats found in the plasma protein fibronectin.); 209…	Neg: SP(Sec/SPI) (Pr: 0.980), Pos: SP(Sec/SPI) (Pr: 0.927)	0 Y n6-16c21/22o	1053	11	TANFOR	32	171	4.63e-11
199	511	Dyadobacter sp. AR-3-8	NZ_SZVO01000003.1	14766	22514	+	WP_137339323.1		Neg: SP(Sec/SPI) (Pr: 0.909), Pos: SP(Sec/SPI) (Pr: 0.958)	0 Y n10-20c25/26o	2582	WP_137339681.1			0 0 o	547	10	WP_137339324.1		Neg: SP(Sec/SPI) (Pr: 0.976), Pos: SP(Sec/SPI) (Pr: 0.832)	0 Y n5-16c21/22o	668	11	WP_137339325.1	596-687: cd00063 (FN3, Fibronectin type 3 domain; One of three types of internal repeats found in the plasma protein fibronectin.); 503-591: cd00063 (FN3, Fibronectin type 3 domain; One of three types of internal repeats found in the plasma protein fibronectin.); 317-405: cd00063 (FN3, Fibronectin type 3 domain; One of three types of internal repeats found in the plasma protein fibronectin.); 692…	Neg: SP(Sec/SPI) (Pr: 0.533), Pos: SP(Sec/SPI) (Pr: 0.563)	0 Y n7-18c23/24o	1056	28	TANFOR	32	170	1.86e-10
200	523	Dyadobacter sp. 32 Dyadobacter sp. 32 sample 2	NZ_LR597066.1	7070901	7078748	+	WP_149244604.1	36-180: TIGR02542 (T_forsyth_147, TANFOR domain.)	Neg: SP(Sec/SPI) (Pr: 0.655), Pos: SP(Sec/SPI) (Pr: 0.813)	0 Y n17-27c34/35o	2615	WP_149244603.1		Neg: SP(Sec/SPI) (Pr: 0.998), Pos: SP(Sec/SPI) (Pr: 0.979)	0 Y n4-15c20/21o	563	-17	WP_149244605.1		Neg: SP(Sec/SPI) (Pr: 0.998), Pos: SP(Sec/SPI) (Pr: 0.993)	0 Y n8-16c21/22o	665	12	WP_149244606.1	601-689: cd00063 (FN3, Fibronectin type 3 domain; One of three types of internal repeats found in the plasma protein fibronectin.); 415-503: cd00063 (FN3, Fibronectin type 3 domain; One of three types of internal repeats found in the plasma protein fibronectin.); 255-589: COG3401 (FN3, Fibronectin type 3 domain [General function prediction only].); 694-782: cd00063 (FN3, Fibronectin type 3 domain…	Neg: SP(Sec/SPI) (Pr: 0.799), Pos: SP(Sec/SPI) (Pr: 0.815)	0 Y n15-26c31/32o	1054	23	TANFOR	36	180	2.34e-11
201	555	Larkinella sp. MA1	NZ_VTWS01000003.1	866869	874308	+	WP_150877453.1	32-171: TIGR02542 (T_forsyth_147, TANFOR domain.)	Neg: SP(Sec/SPI) (Pr: 0.990), Pos: SP(Sec/SPI) (Pr: 0.982)	0 Y n13-21c29/30o	2479	WP_150877451.1		Neg: SP(Sec/SPI) (Pr: 0.997), Pos: SP(Sec/SPI) (Pr: 0.972)	0 Y n4-15c19/20o	563	-17	WP_150877455.1		Neg: SP(Sec/SPI) (Pr: 0.947), Pos: SP(Sec/SPI) (Pr: 0.816)	0 Y n5-16c20/21o	668	-4	WP_150877457.1	499-588: cd00063 (FN3, Fibronectin type 3 domain; One of three types of internal repeats found in the plasma protein fibronectin.); 405-494: cd00063 (FN3, Fibronectin type 3 domain; One of three types of internal repeats found in the plasma protein fibronectin.); 309-397: cd00063 (FN3, Fibronectin type 3 domain; One of three types of internal repeats found in the plasma protein fibronectin.); 216…	Neg: SP(Sec/SPI) (Pr: 0.902), Pos: SP(Sec/SPI) (Pr: 0.873)	0 Y n13-23c28/29o	867	-10	TANFOR	32	171	1.6e-11
202	239	Pedobacter insulae DSM 18684	NZ_FOPP01000006.1	11939	18724	-	WP_090994002.1			0 0 o	2261	WP_090994003.1		Neg: SP(Sec/SPI) (Pr: 0.992), Pos: SP(Sec/SPI) (Pr: 0.989)	0 Y n4-14c22/23o	560	78	WP_090994000.1		Neg: SP(Sec/SPI) (Pr: 0.952), Pos: SP(Sec/SPI) (Pr: 0.916)	0 Y n4-12c18/19o	499	20					0	0	TANFOR	20	146	1.25e-08
203	503	Pedobacter sp. RP-1-13	NZ_SJSK01000008.1	12426	19262	-	WP_131555526.1	1355-1450: pfam13620 (CarboxypepD_reg, Carboxypeptidase regulatory-like domain.)	Pos: SP(Sec/SPI) (Pr: 0.862)	0 Y n14-25c30/31o	2278	WP_131555527.1		Neg: SP(Sec/SPI) (Pr: 0.993), Pos: SP(Sec/SPI) (Pr: 0.944)	0 Y n4-15c20/21o	558	18	WP_131555525.1		Neg: SP(Sec/SPI) (Pr: 0.994), Pos: SP(Sec/SPI) (Pr: 0.906)	0 Y n4-12c18/19o	506	15					0	0	TANFOR	35	162	1.98e-10
204	279	Pedobacter ginsenosidimutans KACC 14530	NZ_LMZQ01000027.1	86582	93892	+	WP_057934355.1		Neg: SP(Sec/SPI) (Pr: 0.943), Pos: SP(Sec/SPI) (Pr: 0.983)	0 Y n15-26c34/35o	2436	WP_057934354.1		Neg: LIPO(Sec/SPII) (Pr: 0.896), Pos: LIPO(Sec/SPII) (Pr: 0.916)	0 Y n4-15c20/21o	558	18	WP_057934356.1		Neg: SP(Sec/SPI) (Pr: 0.981), Pos: SP(Sec/SPI) (Pr: 0.982)	0 Y n11-22c26/27o	671	2					0	0	TANFOR	33	163	3.46e-09
205	506	Pedobacter sp. RP-3-21	NZ_SJSO01000010.1	16623	24002	-	WP_131530984.1		Neg: SP(Sec/SPI) (Pr: 0.969), Pos: SP(Sec/SPI) (Pr: 0.989)	0 Y n14-24c32/33o	2459	WP_131530986.1		Neg: SP(Sec/SPI) (Pr: 0.780), Pos: SP(Sec/SPI) (Pr: 0.550)	0 Y n4-15c19/20o	557	18	WP_131530982.1	289-473: COG3401 (FN3, Fibronectin type 3 domain [General function prediction only].)	Neg: SP(Sec/SPI) (Pr: 0.977), Pos: SP(Sec/SPI) (Pr: 0.969)	0 Y n11-22c26/27o	671	2					0	0	TANFOR	33	163	6.13e-09
206	253	Spirosoma panaciterrae DSM 21099	NZ_KB893244.1	109415	113677	-	WP_020601205.1	39-178: TIGR02542 (T_forsyth_147, TANFOR domain.)	Neg: SP(Sec/SPI) (Pr: 0.937), Pos: SP(Sec/SPI) (Pr: 0.961)	0 Y n19-30c35/36o	1420	WP_020601206.1		Neg: SP(Sec/SPI) (Pr: 0.995), Pos: SP(Sec/SPI) (Pr: 0.927)	0 Y n4-15c20/21o	564	-17	WP_020601204.1	333-560: COG3401 (FN3, Fibronectin type 3 domain [General function prediction only].)	Neg: LIPO(Sec/SPII) (Pr: 0.677), Pos: LIPO(Sec/SPII) (Pr: 0.536)	0 Y n4-14c19/20o	661	32	WP_020601203.1	398-486: cd00063 (FN3, Fibronectin type 3 domain; One of three types of internal repeats found in the plasma protein fibronectin.); 491-579: cd00063 (FN3, Fibronectin type 3 domain; One of three types of internal repeats found in the plasma protein fibronectin.); 771-859: cd00063 (FN3, Fibronectin type 3 domain; One of three types of internal repeats found in the plasma protein fibronectin.); 584…	Neg: SP(Sec/SPI) (Pr: 0.959), Pos: SP(Sec/SPI) (Pr: 0.945)	0 Y n4-15c23/24o	951	26	TANFOR	39	178	3.51e-14
207	259	Siphonobacter aquaeclarae DSM 21668	NZ_FNGS01000005.1	444927	449174	-	WP_093203839.1	20-159: TIGR02542 (T_forsyth_147, TANFOR domain.)	Neg: SP(Sec/SPI) (Pr: 0.986), Pos: SP(Sec/SPI) (Pr: 0.712)	0 Y n4-12c17/18o	1415	WP_093203843.1		Neg: SP(Sec/SPI) (Pr: 0.987), Pos: SP(Sec/SPI) (Pr: 0.786)	0 Y n5-13c18/19o	548	4	WP_093203836.1	559-637: pfam00041 (fn3, Fibronectin type III domain.)	Neg: SP(Sec/SPI) (Pr: 0.926), Pos: SP(Sec/SPI) (Pr: 0.642)	0 Y n4-14c19/20o	646	16	WP_093203833.1		Neg: LIPO(Sec/SPII) (Pr: 0.990), Pos: LIPO(Sec/SPII) (Pr: 0.789)	0 Y n5-12c16/17o	143	-4	TANFOR	20	159	5.04e-16
208	430	Larkinella rosea KCTC52004	NZ_RQJO01000008.1	1704333	1708517	-	WP_124876011.1	30-170: TIGR02542 (T_forsyth_147, TANFOR domain.)	Neg: SP(Sec/SPI) (Pr: 0.957), Pos: SP(Sec/SPI) (Pr: 0.963)	0 Y n14-24c29/30o	1394	WP_124876012.1		Neg: SP(Sec/SPI) (Pr: 0.973), Pos: SP(Sec/SPI) (Pr: 0.767)	0 Y n4-15c20/21o	564	-17	WP_124876010.1	372-556: COG3401 (FN3, Fibronectin type 3 domain [General function prediction only].); 571-648: pfam00041 (fn3, Fibronectin type III domain.)	Neg: SP(Sec/SPI) (Pr: 0.940), Pos: SP(Sec/SPI) (Pr: 0.904)	0 Y n5-16c21/22o	661	21	WP_124876009.1	308-395: cd00063 (FN3, Fibronectin type 3 domain; One of three types of internal repeats found in the plasma protein fibronectin.); 494-582: cd00063 (FN3, Fibronectin type 3 domain; One of three types of internal repeats found in the plasma protein fibronectin.); 400-489: cd00063 (FN3, Fibronectin type 3 domain; One of three types of internal repeats found in the plasma protein fibronectin.); 213…	Neg: SP(Sec/SPI) (Pr: 0.973), Pos: SP(Sec/SPI) (Pr: 0.965)	0 Y n11-22c27/28o	861	-4	TANFOR	30	170	4.59e-11
209	493	Flavobacterium sp. GSN2	NZ_RYDF01000022.1	83866	88770	+	WP_126744109.1	24-160: TIGR02542 (T_forsyth_147, TANFOR domain.)	Neg: SP(Sec/SPI) (Pr: 0.961), Pos: SP(Sec/SPI) (Pr: 0.771)	0 Y n7-15c23/24o	1634	WP_126744108.1		Neg: LIPO(Sec/SPII) (Pr: 0.525), Pos: LIPO(Sec/SPII) (Pr: 0.617)	0 Y n6-16c21/22o	558	10	WP_126744110.1	189-542: COG3401 (FN3, Fibronectin type 3 domain [General function prediction only].)	Neg: SP(Sec/SPI) (Pr: 0.991), Pos: SP(Sec/SPI) (Pr: 0.916)	0 Y n4-14c18/19o	641	17	WP_126744111.1	5-105: TIGR01068 (thioredoxin, thioredoxin.)		0 0 o	105	108	TANFOR	24	160	9.53e-18
210	497	Flavobacterium sp. LLJ-11	NZ_SBKO01000001.1	920688	925214	+	WP_129434697.1	27-164: TIGR02542 (T_forsyth_147, TANFOR domain.)	Neg: SP(Sec/SPI) (Pr: 0.952), Pos: SP(Sec/SPI) (Pr: 0.799)	0 Y n7-16c21/22o	1508	WP_129434695.1		Neg: LIPO(Sec/SPII) (Pr: 0.912), Pos: LIPO(Sec/SPII) (Pr: 0.787)	0 Y n7-18c23/24o	560	11	WP_129434699.1	191-542: COG3401 (FN3, Fibronectin type 3 domain [General function prediction only].)	Neg: SP(Sec/SPI) (Pr: 0.928), Pos: SP(Sec/SPI) (Pr: 0.719)	0 Y n4-14c19/20o	641	20	WP_129434701.1	5-105: TIGR01068 (thioredoxin, thioredoxin.)		0 0 o	105	104	TANFOR	27	164	5.44e-14
211	542	Flavobacterium sp. GT3R68	NZ_VJZK01000001.1	832469	837373	+	WP_126744109.1	24-160: TIGR02542 (T_forsyth_147, TANFOR domain.)	Neg: SP(Sec/SPI) (Pr: 0.961), Pos: SP(Sec/SPI) (Pr: 0.771)	0 Y n7-15c23/24o	1634	WP_126744108.1		Neg: LIPO(Sec/SPII) (Pr: 0.525), Pos: LIPO(Sec/SPII) (Pr: 0.617)	0 Y n6-16c21/22o	558	10	WP_126744110.1	189-542: COG3401 (FN3, Fibronectin type 3 domain [General function prediction only].)	Neg: SP(Sec/SPI) (Pr: 0.991), Pos: SP(Sec/SPI) (Pr: 0.916)	0 Y n4-14c18/19o	641	17	WP_126744111.1	5-105: TIGR01068 (thioredoxin, thioredoxin.)		0 0 o	105	108	TANFOR	24	160	9.53e-18
212	230	Runella limosa DSM 17973	NZ_KI519422.1	254617	260640	+	WP_028525021.1	47-186: TIGR02542 (T_forsyth_147, TANFOR domain.)	Pos: SP(Sec/SPI) (Pr: 0.632)	1 0 i26-44o	2007	WP_051398113.1		Neg: SP(Sec/SPI) (Pr: 0.987), Pos: SP(Sec/SPI) (Pr: 0.858)	0 Y n4-12c18/19o	548	-17	WP_028525022.1		Neg: SP(Sec/SPI) (Pr: 0.977), Pos: SP(Sec/SPI) (Pr: 0.921)	0 Y n4-14c19/20o	350	28	WP_028525023.1		Neg: SP(Sec/SPI) (Pr: 0.870), Pos: SP(Sec/SPI) (Pr: 0.734)	0 Y n9-17c22/23o	700	8	TANFOR	47	186	1.27e-13
213	475	Runella sp. SP2	NZ_CP031030.1	6672734	6678826	+	WP_122933667.1	52-191: TIGR02542 (T_forsyth_147, TANFOR domain.)		1 0 i20-43o	2030	WP_122933666.1		Neg: SP(Sec/SPI) (Pr: 0.961), Pos: SP(Sec/SPI) (Pr: 0.821)	0 Y n4-12c18/19o	548	-17	WP_122933668.1		Neg: SP(Sec/SPI) (Pr: 0.987), Pos: SP(Sec/SPI) (Pr: 0.925)	0 Y n4-14c19/20o	350	28	WP_122933669.1			0 0 o	666	164	TANFOR	52	191	8.27e-14
214	334	Spirosoma oryzae DSM 28354	NZ_PVTE01000003.1	34451	40858	-	WP_106136493.1	46-188: TIGR02542 (T_forsyth_147, TANFOR domain.)	Neg: SP(Sec/SPI) (Pr: 0.495), Pos: SP(Sec/SPI) (Pr: 0.627)	0 Y n22-33c37/38o	2135	WP_106136494.1		Neg: SP(Sec/SPI) (Pr: 0.872), Pos: SP(Sec/SPI) (Pr: 0.725)	0 Y n4-15c20/21o	563	-17	WP_106136492.1		Neg: LIPO(Sec/SPII) (Pr: 0.804), Pos: LIPO(Sec/SPII) (Pr: 0.847)	0 Y n8-19c27/28o	724	216	WP_106136491.1	591-679: cd00063 (FN3, Fibronectin type 3 domain; One of three types of internal repeats found in the plasma protein fibronectin.); 684-773: cd00063 (FN3, Fibronectin type 3 domain; One of three types of internal repeats found in the plasma protein fibronectin.); 778-866: cd00063 (FN3, Fibronectin type 3 domain; One of three types of internal repeats found in the plasma protein fibronectin.); 405…	Neg: SP(Sec/SPI) (Pr: 0.969), Pos: SP(Sec/SPI) (Pr: 0.924)	0 Y n6-18c22/23o	1145	56	TANFOR	46	188	2e-14
215	500	Spirosoma sp. KCTC 42546	NZ_CP041360.1	7695788	7702189	-	WP_142775846.1	47-189: TIGR02542 (T_forsyth_147, TANFOR domain.)	Neg: SP(Sec/SPI) (Pr: 0.767), Pos: SP(Sec/SPI) (Pr: 0.904)	0 Y n20-31c38/39o	2133	WP_142775847.1		Neg: SP(Sec/SPI) (Pr: 0.997), Pos: SP(Sec/SPI) (Pr: 0.983)	0 Y n4-15c20/21o	564	-17	WP_142775845.1	390-614: COG3401 (FN3, Fibronectin type 3 domain [General function prediction only].)	Neg: SP(Sec/SPI) (Pr: 0.900), Pos: SP(Sec/SPI) (Pr: 0.902)	0 Y n9-20c27/28o	719	13	WP_142775844.1	579-667: cd00063 (FN3, Fibronectin type 3 domain; One of three types of internal repeats found in the plasma protein fibronectin.); 394-481: cd00063 (FN3, Fibronectin type 3 domain; One of three types of internal repeats found in the plasma protein fibronectin.); 672-760: cd00063 (FN3, Fibronectin type 3 domain; One of three types of internal repeats found in the plasma protein fibronectin.); 486…	Neg: SP(Sec/SPI) (Pr: 0.822), Pos: SP(Sec/SPI) (Pr: 0.872)	0 Y n4-15c24/25o	1133	34	TANFOR	47	189	2.66e-13
216	381	Arsenicibacter rosenii SM-1	NZ_MORL01000004.1	276225	282560	-	WP_071503015.1	58-200: TIGR02542 (T_forsyth_147, TANFOR domain.)	Neg: SP(Sec/SPI) (Pr: 0.790), Pos: SP(Sec/SPI) (Pr: 0.844)	0 Y n32-43c49/50o	2111	WP_071503212.1			0 0 o	551	-17	WP_071503014.1		Neg: SP(Sec/SPI) (Pr: 0.964), Pos: SP(Sec/SPI) (Pr: 0.891)	0 Y n3-13c21/22o	346	22	WP_071503013.1		Neg: SP(Sec/SPI) (Pr: 0.865), Pos: SP(Sec/SPI) (Pr: 0.644)	0 Y n4-14c19/20o	702	7	TANFOR	58	200	4.27e-12
217	330	Spirosoma radiotolerans DG5A	NZ_CP010429.1	1464378	1470296	-	WP_046376071.1	1-143: TIGR02542 (T_forsyth_147, TANFOR domain.)		0 0 o	1972	WP_046376072.1		Neg: SP(Sec/SPI) (Pr: 0.793), Pos: SP(Sec/SPI) (Pr: 0.611)	0 Y n4-15c20/21o	564	154	WP_046376070.1		Neg: SP(Sec/SPI) (Pr: 0.757), Pos: SP(Sec/SPI) (Pr: 0.919)	0 Y n9-19c30/31o	396	-1	WP_046376069.1		Neg: SP(Sec/SPI) (Pr: 0.889), Pos: SP(Sec/SPI) (Pr: 0.819)	0 Y n3-13c21/22o	705	28	TANFOR	1	143	1.35e-14
218	465	Spirosoma sp. HMF3257	NZ_QLII01000001.1	4625730	4627295	-	WP_111344758.1	60-202: TIGR02542 (T_forsyth_147, TANFOR domain.)		1 0 i32-49o	521	WP_111344760.1		Neg: SP(Sec/SPI) (Pr: 0.996), Pos: SP(Sec/SPI) (Pr: 0.953)	0 Y n4-15c20/21o	564	-17	WP_111344756.1			0 0 o	1000	82	WP_111344754.1			0 0 o	541	184	TANFOR	60	202	1.06e-12
219	545	Hymenobacter sp. KIGAM108	NZ_VTHL01000020.1	72701	78751	-	WP_149072183.1	33-172: TIGR02542 (T_forsyth_147, TANFOR domain.); 1118-1193: pfam13620 (CarboxypepD_reg, Carboxypeptidase regulatory-like domain.)	Neg: SP(Sec/SPI) (Pr: 0.992), Pos: SP(Sec/SPI) (Pr: 0.976)	0 Y n11-22c27/28o	2016	WP_149072184.1		Neg: SP(Sec/SPI) (Pr: 0.992), Pos: SP(Sec/SPI) (Pr: 0.986)	0 Y n10-24c29/30o	581	28	WP_149072182.1	336-663: COG3401 (FN3, Fibronectin type 3 domain [General function prediction only].)	Neg: SP(Sec/SPI) (Pr: 0.877), Pos: SP(Sec/SPI) (Pr: 0.771)	0 Y n4-14c19/20o	684	101	WP_149072181.1		Neg: LIPO(Sec/SPII) (Pr: 0.996), Pos: LIPO(Sec/SPII) (Pr: 0.995)	0 Y n8-15c20/21o	176	43	TANFOR	33	172	2.95e-16
220	266	Fibrella aestuarina BUZ 2	NC_020054.1	4783922	4792120	-	WP_041258167.1	4-140: TIGR02542 (T_forsyth_147, TANFOR domain.)		0 0 o	2732	WP_015332968.1		Neg: SP(Sec/SPI) (Pr: 0.992), Pos: SP(Sec/SPI) (Pr: 0.985)	0 Y n4-14c22/23o	584	184	WP_041258166.1		Neg: SP(Sec/SPI) (Pr: 0.862), Pos: SP(Sec/SPI) (Pr: 0.770)	0 Y n8-19c25/26o	708	2	WP_015332965.1	315-407: cd00063 (FN3, Fibronectin type 3 domain; One of three types of internal repeats found in the plasma protein fibronectin.); 612-694: cd00063 (FN3, Fibronectin type 3 domain; One of three types of internal repeats found in the plasma protein fibronectin.); 509-604: cd00063 (FN3, Fibronectin type 3 domain; One of three types of internal repeats found in the plasma protein fibronectin.); 227…	Neg: SP(Sec/SPI) (Pr: 0.930), Pos: SP(Sec/SPI) (Pr: 0.949)	0 Y n15-25c30/31o	987	-4	TANFOR	4	140	5.78e-16
221	320	Spirosoma aerolatum KACC 17939	NZ_CP020104.1	2317392	2324249	-	WP_080055424.1	50-192: TIGR02542 (T_forsyth_147, TANFOR domain.)	Neg: SP(Sec/SPI) (Pr: 0.806), Pos: SP(Sec/SPI) (Pr: 0.938)	0 Y n23-34c41/42o	2285	WP_080055425.1		Neg: SP(Sec/SPI) (Pr: 0.995), Pos: SP(Sec/SPI) (Pr: 0.970)	0 Y n4-15c20/21o	564	-17	WP_080055423.1	440-702: COG3401 (FN3, Fibronectin type 3 domain [General function prediction only].)	Neg: SP(Sec/SPI) (Pr: 0.873), Pos: SP(Sec/SPI) (Pr: 0.706)	0 Y n4-12c17/18o	706	-4	WP_080055422.1	398-484: cd00063 (FN3, Fibronectin type 3 domain; One of three types of internal repeats found in the plasma protein fibronectin.); 489-577: cd00063 (FN3, Fibronectin type 3 domain; One of three types of internal repeats found in the plasma protein fibronectin.); 769-857: cd00063 (FN3, Fibronectin type 3 domain; One of three types of internal repeats found in the plasma protein fibronectin.); 675…	Neg: SP(Sec/SPI) (Pr: 0.947), Pos: SP(Sec/SPI) (Pr: 0.942)	0 Y n7-18c22/23o	949	2	TANFOR	50	192	3.72e-12
222	188	Hymenobacter chitinivorans DSM 11115	NZ_PGFA01000001.1	105849	111791	+	WP_100334435.1	27-166: TIGR02542 (T_forsyth_147, TANFOR domain.)	Neg: SP(Sec/SPI) (Pr: 0.985), Pos: SP(Sec/SPI) (Pr: 0.951)	0 Y n2-13c21/22o	1980	WP_100334434.1			0 0 o	558	97	WP_100334436.1		Neg: SP(Sec/SPI) (Pr: 0.961), Pos: SP(Sec/SPI) (Pr: 0.864)	0 Y n13-21c26/27o	690	8	WP_100334437.1		Neg: LIPO(Sec/SPII) (Pr: 0.947), Pos: LIPO(Sec/SPII) (Pr: 0.895)	0 Y n10-20c24/25o	180	561	TANFOR	27	166	3.06e-20
223	273	Fibrisoma limi BUZ 3	NZ_CAIT01000004.1	1059598	1065462	+	WP_009280668.1	55-180: TIGR02542 (T_forsyth_147, TANFOR domain.)	Neg: SP(Sec/SPI) (Pr: 0.821), Pos: SP(Sec/SPI) (Pr: 0.881)	0 Y n27-38c46/47o	1954	WP_009280667.1		Neg: SP(Sec/SPI) (Pr: 0.871), Pos: SP(Sec/SPI) (Pr: 0.779)	0 Y n3-14c19/20o	563	-17	WP_009280669.1		Neg: SP(Sec/SPI) (Pr: 0.935), Pos: SP(Sec/SPI) (Pr: 0.644)	0 Y n7-15c20/21o	236	2	WP_009280670.1	527-617: cd00063 (FN3, Fibronectin type 3 domain; One of three types of internal repeats found in the plasma protein fibronectin.); 387-610: COG3401 (FN3, Fibronectin type 3 domain [General function prediction only].)	Neg: SP(Sec/SPI) (Pr: 0.509), Pos: SP(Sec/SPI) (Pr: 0.619)	0 Y n18-28c33/34o	710	-37	TANFOR	55	180	1.74e-12
224	377	Dyadobacter sp. Leaf189	NZ_LMPS01000001.1	2018843	2024647	+	WP_056282561.1	19-161: TIGR02542 (T_forsyth_147, TANFOR domain.)	Neg: SP(Sec/SPI) (Pr: 0.934), Pos: SP(Sec/SPI) (Pr: 0.557)	0 Y n2-12c16/17o	1934	WP_056282559.1		Neg: SP(Sec/SPI) (Pr: 0.992), Pos: SP(Sec/SPI) (Pr: 0.935)	0 Y n7-15c21/22o	564	31	WP_056282564.1		Neg: SP(Sec/SPI) (Pr: 0.977), Pos: SP(Sec/SPI) (Pr: 0.905)	0 Y n10-19c24/25o	334	22	WP_056282567.1		Neg: SP(Sec/SPI) (Pr: 0.603), Pos: SP(Sec/SPI) (Pr: 0.745)	0 Y n8-21c26/27o	707	4	TANFOR	19	161	1.29e-11
225	507	Dyadobacter sp. AR-3-6	NZ_SMFL01000015.1	138754	144591	-	WP_131961685.1		Neg: SP(Sec/SPI) (Pr: 0.833), Pos: SP(Sec/SPI) (Pr: 0.951)	0 Y n13-24c32/33o	1945	WP_131961702.1			0 0 o	544	-17	WP_131961684.1		Neg: LIPO(Sec/SPII) (Pr: 0.710), Pos: LIPO(Sec/SPII) (Pr: 0.430)	0 Y n3-14c18/19o	337	19	WP_131961683.1		Neg: SP(Sec/SPI) (Pr: 0.506), Pos: SP(Sec/SPI) (Pr: 0.683)	0 Y n8-23c28/29o	706	11	TANFOR	35	177	2.74e-09
226	401	Mucilaginibacter sp. OK283	NZ_FODR01000001.1	496522	502980	+	WP_090639936.1	19-159: TIGR02542 (T_forsyth_147, TANFOR domain.); 1252-1331: pfam13620 (CarboxypepD_reg, Carboxypeptidase regulatory-like domain.)	Neg: SP(Sec/SPI) (Pr: 0.986), Pos: SP(Sec/SPI) (Pr: 0.878)	0 Y n4-14c19/20o	2152	WP_090639931.1		Neg: SP(Sec/SPI) (Pr: 0.776), Pos: SP(Sec/SPI) (Pr: 0.748)	0 Y n12-23c28/29o	572	4	WP_090639941.1	327-558: COG3401 (FN3, Fibronectin type 3 domain [General function prediction only].)	Neg: SP(Sec/SPI) (Pr: 0.830), Pos: SP(Sec/SPI) (Pr: 0.694)	0 Y n6-17c24/25o	668	10					0	0	TANFOR	19	159	6.79e-18
227	460	Pedobacter sp. YR510	NZ_QUNJ01000004.1	1128050	1134475	+	WP_116170201.1	22-162: TIGR02542 (T_forsyth_147, TANFOR domain.); 1256-1331: cl21470 (Peptidase_M14NE-CP-C_like, Peptidase associated domain: C-terminal domain of M14 N/E carboxypeptidase; putative folding, regulation, or interaction domain.)	Neg: SP(Sec/SPI) (Pr: 0.967), Pos: SP(Sec/SPI) (Pr: 0.935)	0 Y n4-15c22/23o	2141	WP_116170200.1		Neg: SP(Sec/SPI) (Pr: 0.992), Pos: SP(Sec/SPI) (Pr: 0.976)	0 Y n11-21c26/27o	571	2	WP_116170202.1			0 0 o	653	57	WP_116170203.1	198-275: cd00102 (IPT, Immunoglobulin-like fold, Plexins, Transcription factors (IPT).); 278-355: smart00429 (IPT, ig-like, plexins, transcription factors.); 119-196: pfam01833 (TIG, IPT/TIG domain.)	Neg: LIPO(Sec/SPII) (Pr: 0.916), Pos: LIPO(Sec/SPII) (Pr: 0.917)	0 Y n7-18c22/23o	640	19	TANFOR	22	162	5.45e-16
228	483	Pedobacter sp. G11	NZ_CP034190.1	3445263	3451688	+	WP_124913909.1	22-162: TIGR02542 (T_forsyth_147, TANFOR domain.); 1256-1331: cl21470 (Peptidase_M14NE-CP-C_like, Peptidase associated domain: C-terminal domain of M14 N/E carboxypeptidase; putative folding, regulation, or interaction domain.)	Neg: SP(Sec/SPI) (Pr: 0.967), Pos: SP(Sec/SPI) (Pr: 0.935)	0 Y n4-15c22/23o	2141	WP_124913908.1		Neg: SP(Sec/SPI) (Pr: 0.978), Pos: SP(Sec/SPI) (Pr: 0.933)	0 Y n11-21c26/27o	571	2	WP_124913910.1		Neg: SP(Sec/SPI) (Pr: 0.990), Pos: SP(Sec/SPI) (Pr: 0.872)	0 Y n3-14c18/19o	668	11	WP_124913911.1	198-274: smart00429 (IPT, ig-like, plexins, transcription factors.); 278-355: smart00429 (IPT, ig-like, plexins, transcription factors.); 36-114: pfam01833 (TIG, IPT/TIG domain.)	Neg: LIPO(Sec/SPII) (Pr: 0.916), Pos: LIPO(Sec/SPII) (Pr: 0.919)	0 Y n7-15c20/21o	640	19	TANFOR	22	162	1.92e-16
229	257	Mucilaginibacter gossypii Gh-67	NZ_FNCG01000031.1	21069	27518	-	WP_091176271.1	19-159: TIGR02542 (T_forsyth_147, TANFOR domain.)	Neg: SP(Sec/SPI) (Pr: 0.958), Pos: SP(Sec/SPI) (Pr: 0.818)	0 Y n4-15c19/20o	2149	WP_091176274.1		Neg: SP(Sec/SPI) (Pr: 0.504), Pos: LIPO(Sec/SPII) (Pr: 0.671)	0 Y n5-16c20/21o	564	4	WP_091176269.1		Neg: SP(Sec/SPI) (Pr: 0.992), Pos: SP(Sec/SPI) (Pr: 0.938)	0 Y n6-14c19/20o	668	12					0	0	TANFOR	19	159	2.06e-20
230	263	Pedobacter namyangjuensis 5G38	NZ_QMHQ01000001.1	1152908	1159375	+	WP_113652030.1	21-162: TIGR02542 (T_forsyth_147, TANFOR domain.)	Neg: SP(Sec/SPI) (Pr: 0.966), Pos: SP(Sec/SPI) (Pr: 0.859)	0 Y n4-14c22/23o	2155	WP_113652029.1		Neg: SP(Sec/SPI) (Pr: 0.995), Pos: SP(Sec/SPI) (Pr: 0.956)	0 Y n10-20c25/26o	570	2	WP_113652031.1	502-650: COG3401 (FN3, Fibronectin type 3 domain [General function prediction only].)		0 0 o	655	61	WP_113652032.1	119-193: cd00603 (IPT_PCSR, IPT domain of Plexins and Cell Surface Receptors (PCSR) and related proteins .); 198-274: smart00429 (IPT, ig-like, plexins, transcription factors.); 367-453: cd00603 (IPT_PCSR, IPT domain of Plexins and Cell Surface Receptors (PCSR) and related proteins .); 278-354: cl15674 (IPT, N/A.)	Neg: LIPO(Sec/SPII) (Pr: 0.927), Pos: LIPO(Sec/SPII) (Pr: 0.972)	0 Y n7-17c22/23o	642	22	TANFOR	21	162	3.36e-16
231	472	Pedobacter chitinilyticus CM134L-2	NZ_QMHN01000009.1	18221	24697	+	WP_113649288.1	24-164: TIGR02542 (T_forsyth_147, TANFOR domain.); 1274-1346: pfam13620 (CarboxypepD_reg, Carboxypeptidase regulatory-like domain.)	Neg: SP(Sec/SPI) (Pr: 0.660), Pos: SP(Sec/SPI) (Pr: 0.846)	0 Y n4-19c24/25o	2158	WP_113649287.1		Neg: SP(Sec/SPI) (Pr: 0.983), Pos: SP(Sec/SPI) (Pr: 0.977)	0 Y n7-17c24/25o	568	2	WP_113649289.1		Neg: SP(Sec/SPI) (Pr: 0.680), Pos: LIPO(Sec/SPII) (Pr: 0.544)	0 Y n3-13c17/18o	669	50	WP_113649290.1	198-275: cl15674 (IPT, N/A.)	Neg: LIPO(Sec/SPII) (Pr: 0.931), Pos: LIPO(Sec/SPII) (Pr: 0.936)	0 Y n10-17c22/23o	559	3	TANFOR	24	164	7.7e-14
232	473	Pedobacter chitinilyticus CM134L-2	NZ_SAYW01000009.1	18221	24697	+	WP_113649288.1	24-164: TIGR02542 (T_forsyth_147, TANFOR domain.); 1274-1346: pfam13620 (CarboxypepD_reg, Carboxypeptidase regulatory-like domain.)	Neg: SP(Sec/SPI) (Pr: 0.660), Pos: SP(Sec/SPI) (Pr: 0.846)	0 Y n4-19c24/25o	2158	WP_113649287.1		Neg: SP(Sec/SPI) (Pr: 0.983), Pos: SP(Sec/SPI) (Pr: 0.977)	0 Y n7-17c24/25o	568	2	WP_113649289.1		Neg: SP(Sec/SPI) (Pr: 0.680), Pos: LIPO(Sec/SPII) (Pr: 0.544)	0 Y n3-13c17/18o	669	50	WP_113649290.1	198-275: cl15674 (IPT, N/A.)	Neg: LIPO(Sec/SPII) (Pr: 0.931), Pos: LIPO(Sec/SPII) (Pr: 0.936)	0 Y n10-17c22/23o	559	3	TANFOR	24	164	7.7e-14
233	524	Mucilaginibacter gossypii P4	NZ_CP043449.1	701739	708182	+	WP_112656698.1	19-159: TIGR02542 (T_forsyth_147, TANFOR domain.); 1254-1326: pfam13620 (CarboxypepD_reg, Carboxypeptidase regulatory-like domain.)	Neg: SP(Sec/SPI) (Pr: 0.960), Pos: SP(Sec/SPI) (Pr: 0.821)	0 Y n4-15c19/20o	2147	WP_112656696.1		Neg: LIPO(Sec/SPII) (Pr: 0.522), Pos: LIPO(Sec/SPII) (Pr: 0.687)	0 Y n5-16c20/21o	564	4	WP_112656700.1		Neg: SP(Sec/SPI) (Pr: 0.992), Pos: SP(Sec/SPI) (Pr: 0.938)	0 Y n6-14c19/20o	668	12	WP_112656702.1	12-119: cd00156 (REC, Signal receiver domain; originally thought to be unique to bacteria (CheY, OmpR, NtrC, and PhoB), now recently identified in eukaroytes ETR1 Arabidopsis thaliana; this domain receives the signal from the sensor partner in a two-component systems; contains a phosphoacceptor site that is phosphorylated by histidine kinase homologs; usually found N-terminal to a DNA binding eff…		0 0 o	120	663	TANFOR	19	159	1.79e-19
234	538	Mucilaginibacter rubeus P2	NZ_CP043451.1	701913	708356	+	WP_112656698.1	19-159: TIGR02542 (T_forsyth_147, TANFOR domain.); 1254-1326: pfam13620 (CarboxypepD_reg, Carboxypeptidase regulatory-like domain.)	Neg: SP(Sec/SPI) (Pr: 0.960), Pos: SP(Sec/SPI) (Pr: 0.821)	0 Y n4-15c19/20o	2147	WP_112656696.1		Neg: LIPO(Sec/SPII) (Pr: 0.522), Pos: LIPO(Sec/SPII) (Pr: 0.687)	0 Y n5-16c20/21o	564	4	WP_112656700.1		Neg: SP(Sec/SPI) (Pr: 0.992), Pos: SP(Sec/SPI) (Pr: 0.938)	0 Y n6-14c19/20o	668	12	WP_112656702.1	12-119: cd00156 (REC, Signal receiver domain; originally thought to be unique to bacteria (CheY, OmpR, NtrC, and PhoB), now recently identified in eukaroytes ETR1 Arabidopsis thaliana; this domain receives the signal from the sensor partner in a two-component systems; contains a phosphoacceptor site that is phosphorylated by histidine kinase homologs; usually found N-terminal to a DNA binding eff…		0 0 o	120	663	TANFOR	19	159	1.79e-19
235	278	Sphingobacterium wenxiniae DSM 22789	NZ_FOZZ01000014.1	52347	60500	+	WP_093367322.1		Neg: SP(Sec/SPI) (Pr: 0.818), Pos: SP(Sec/SPI) (Pr: 0.761)	0 Y n10-21c26/27o	2717	WP_093367320.1		Neg: SP(Sec/SPI) (Pr: 0.829), Pos: SP(Sec/SPI) (Pr: 0.617)	0 Y n4-15c21/22o	570	-4	WP_093367323.1	302-652: COG3401 (FN3, Fibronectin type 3 domain [General function prediction only].)	Neg: SP(Sec/SPI) (Pr: 0.965), Pos: SP(Sec/SPI) (Pr: 0.852)	0 Y n4-14c19/20o	656	9					0	0	TANFOR	25	153	2.75e-09
236	348	Sphingobacteriaceae bacterium DW12	NZ_JROE01000002.1	322245	330539	-	WP_033562759.1	25-165: TIGR02542 (T_forsyth_147, TANFOR domain.)	Neg: SP(Sec/SPI) (Pr: 0.858), Pos: SP(Sec/SPI) (Pr: 0.729)	0 Y n11-22c26/27o	2764	WP_033562760.1		Neg: SP(Sec/SPI) (Pr: 0.958), Pos: SP(Sec/SPI) (Pr: 0.745)	0 Y n9-18c23/24o	571	79	WP_033562758.1	303-652: COG3401 (FN3, Fibronectin type 3 domain [General function prediction only].)	Neg: SP(Sec/SPI) (Pr: 0.927), Pos: SP(Sec/SPI) (Pr: 0.614)	0 Y n4-15c19/20o	656	10	WP_033562757.1		Neg: SP(Sec/SPI) (Pr: 0.807), Pos: SP(Sec/SPI) (Pr: 0.838)	0 Y n5-16c24/25o	346	191	TANFOR	25	165	1.4e-12
237	484	Sphingobacterium sp. 30C10-4-7	NZ_SGIT01000002.1	411352	419556	-	WP_130141506.1		Neg: SP(Sec/SPI) (Pr: 0.888), Pos: SP(Sec/SPI) (Pr: 0.803)	0 Y n9-20c25/26o	2734	WP_130141507.1		Neg: SP(Sec/SPI) (Pr: 0.936), Pos: SP(Sec/SPI) (Pr: 0.823)	0 Y n4-15c23/24o	572	-4	WP_130141505.1	473-562: cd00063 (FN3, Fibronectin type 3 domain; One of three types of internal repeats found in the plasma protein fibronectin.); 306-653: COG3401 (FN3, Fibronectin type 3 domain [General function prediction only].)	Neg: SP(Sec/SPI) (Pr: 0.611), Pos: SP(Sec/SPI) (Pr: 0.487)	0 Y n4-15c20/21o	657	10					0	0	TANFOR	25	152	5.19e-09
238	544	Sphingobacterium sp. SSI9	NZ_VTAV01000001.1	743292	751496	+	WP_148917677.1		Neg: SP(Sec/SPI) (Pr: 0.888), Pos: SP(Sec/SPI) (Pr: 0.803)	0 Y n9-20c25/26o	2734	WP_148917676.1		Neg: SP(Sec/SPI) (Pr: 0.948), Pos: SP(Sec/SPI) (Pr: 0.840)	0 Y n4-15c23/24o	572	-4	WP_148917678.1	305-653: COG3401 (FN3, Fibronectin type 3 domain [General function prediction only].)	Neg: SP(Sec/SPI) (Pr: 0.756), Pos: SP(Sec/SPI) (Pr: 0.631)	0 Y n4-15c20/21o	657	10					0	0	TANFOR	25	152	5.14e-09
239	231	Olivibacter sitiensis DSM 17696	NZ_ATZA01000023.1	50617	57609	+	WP_028297358.1		Neg: SP(Sec/SPI) (Pr: 0.975), Pos: SP(Sec/SPI) (Pr: 0.822)	0 Y n7-17c22/23o	2330	WP_051293143.1			0 0 o	551	-4	WP_028297359.1		Neg: SP(Sec/SPI) (Pr: 0.947), Pos: SP(Sec/SPI) (Pr: 0.945)	0 Y n19-30c35/36o	696	13	WP_084163895.1	121-197: pfam09411 (PagL, Lipid A 3-O-deacylase (PagL).)	Neg: SP(Sec/SPI) (Pr: 0.702), Pos: SP(Sec/SPI) (Pr: 0.676)	0 Y n7-18c24/25o	373	316	TANFOR	21	138	1.48e-09
240	240	Flavobacterium terrae DSM 18829	NZ_FQZI01000001.1	79593	84134	-	WP_073307596.1	27-164: TIGR02542 (T_forsyth_147, TANFOR domain.)	Neg: SP(Sec/SPI) (Pr: 0.974), Pos: SP(Sec/SPI) (Pr: 0.912)	0 Y n8-19c23/24o	1513	WP_073307598.1			0 0 o	535	10	WP_073307594.1		Neg: SP(Sec/SPI) (Pr: 0.990), Pos: SP(Sec/SPI) (Pr: 0.793)	0 Y n5-15c19/20o	639	12	WP_073307592.1	5-105: TIGR01068 (thioredoxin, thioredoxin.)		0 0 o	105	93	TANFOR	27	164	3.57e-13
241	503	Pedobacter sp. RP-1-13	NZ_SJSK01000005.1	250393	257634	+	WP_131554728.1	26-164: TIGR02542 (T_forsyth_147, TANFOR domain.)	Neg: SP(Sec/SPI) (Pr: 0.969), Pos: SP(Sec/SPI) (Pr: 0.938)	0 Y n6-17c24/25o	2413	WP_131554727.1			0 0 o	556	4	WP_131554729.1		Neg: SP(Sec/SPI) (Pr: 0.908), Pos: SP(Sec/SPI) (Pr: 0.936)	0 Y n4-13c19/20o	660	18	WP_131554730.1	1-239: COG3279 (LytT, DNA-binding response regulator, LytR/AlgR family [Transcription, Signal transduction mechanisms].)		0 0 o	240	69	TANFOR	26	164	8.4e-14
242	504	Pedobacter sp. RP-1-14	NZ_SJSL01000003.1	120371	127402	+	WP_131596748.1	23-164: TIGR02542 (T_forsyth_147, TANFOR domain.)	Neg: SP(Sec/SPI) (Pr: 0.964), Pos: SP(Sec/SPI) (Pr: 0.951)	0 Y n13-20c24/25o	2343	WP_131596747.1		Neg: SP(Sec/SPI) (Pr: 0.947), Pos: SP(Sec/SPI) (Pr: 0.880)	0 Y n13-21c26/27o	570	4	WP_131596749.1	440-659: COG3401 (FN3, Fibronectin type 3 domain [General function prediction only].)	Neg: SP(Sec/SPI) (Pr: 0.996), Pos: SP(Sec/SPI) (Pr: 0.916)	0 Y n8-16c21/22o	663	12	WP_131596750.1	1-266: PRK14609 (PRK14609, 4-diphosphocytidyl-2-C-methyl-D-erythritol kinase; Provisional)		0 0 o	267	73	TANFOR	23	164	3.69e-13
243	298	Chryseolinea serpens DSM 24574	NZ_FQWQ01000002.1	187241	192730	+	WP_073135474.1	34-173: TIGR02542 (T_forsyth_147, TANFOR domain.)	Neg: SP(Sec/SPI) (Pr: 0.637), Pos: SP(Sec/SPI) (Pr: 0.742)	0 Y n11-22c30/31o	1829	WP_084138137.1		Neg: SP(Sec/SPI) (Pr: 0.976), Pos: SP(Sec/SPI) (Pr: 0.988)	0 Y n8-19c27/28o	566	34	WP_073135476.1			0 Y n2-12c17/18o	164	41	WP_073135478.1	526-615: cd00063 (FN3, Fibronectin type 3 domain; One of three types of internal repeats found in the plasma protein fibronectin.)	Neg: SP(Sec/SPI) (Pr: 0.987), Pos: SP(Sec/SPI) (Pr: 0.942)	0 Y n3-14c19/20o	711	4	TANFOR	34	173	7.98e-13
244	480	Chryseolinea sp. KIS68-18	NZ_CP032382.1	7878604	7884078	+	WP_119758316.1	34-173: TIGR02542 (T_forsyth_147, TANFOR domain.)	Neg: SP(Sec/SPI) (Pr: 0.636), Pos: SP(Sec/SPI) (Pr: 0.740)	0 Y n11-22c30/31o	1824	WP_119758315.1		Neg: SP(Sec/SPI) (Pr: 0.989), Pos: SP(Sec/SPI) (Pr: 0.982)	0 Y n8-19c27/28o	566	34	WP_119758317.1		Neg: SP(Sec/SPI) (Pr: 0.970), Pos: SP(Sec/SPI) (Pr: 0.944)	0 Y n6-17c21/22o	174	8	WP_119758318.1		Neg: SP(Sec/SPI) (Pr: 0.996), Pos: SP(Sec/SPI) (Pr: 0.969)	0 Y n3-11c19/20o	712	4	TANFOR	34	173	3.48e-13
245	364	Pedobacter sp. BMA	NZ_LECU01000003.1	314082	319655	+	WP_047798335.1	24-165: TIGR02542 (T_forsyth_147, TANFOR domain.)	Neg: SP(Sec/SPI) (Pr: 0.947), Pos: SP(Sec/SPI) (Pr: 0.820)	0 Y n12-20c24/25o	1857	WP_047798334.1		Neg: SP(Sec/SPI) (Pr: 0.991), Pos: SP(Sec/SPI) (Pr: 0.980)	0 Y n8-19c25/26o	570	4	WP_047798336.1			0 0 o	185	53	WP_047798337.1	387-594: COG3401 (FN3, Fibronectin type 3 domain [General function prediction only].)	Neg: SP(Sec/SPI) (Pr: 0.989), Pos: SP(Sec/SPI) (Pr: 0.916)	0 Y n4-16c20/21o	697	10	TANFOR	24	165	2.79e-18
246	505	Pedobacter sp. RP-3-11	NZ_SJSN01000004.1	128591	134158	+	WP_131557103.1	24-143: TIGR02542 (T_forsyth_147, TANFOR domain.)	Neg: SP(Sec/SPI) (Pr: 0.970), Pos: SP(Sec/SPI) (Pr: 0.877)	0 Y n10-20c24/25o	1855	WP_131557102.1			0 0 o	556	4	WP_131557104.1		Neg: SP(Sec/SPI) (Pr: 0.854), Pos: SP(Sec/SPI) (Pr: 0.608)	0 Y n5-16c20/21o	200	8	WP_131557105.1	392-594: COG3401 (FN3, Fibronectin type 3 domain [General function prediction only].)	Neg: SP(Sec/SPI) (Pr: 0.994), Pos: SP(Sec/SPI) (Pr: 0.937)	0 Y n4-16c20/21o	697	10	TANFOR	24	143	2.84e-16
247	305	Catalinimonas alkaloidigena DSM 25186	NZ_FNFO01000012.1	140909	146329	-	WP_089687189.1	15-153: TIGR02542 (T_forsyth_147, TANFOR domain.)		0 0 o	1806	WP_089687191.1		Neg: SP(Sec/SPI) (Pr: 0.383), Pos: SP(Sec/SPI) (Pr: 0.608)	0 Y n14-25c33/34o	584	101	WP_089687187.1		Neg: SP(Sec/SPI) (Pr: 0.910), Pos: SP(Sec/SPI) (Pr: 0.874)	0 Y n7-18c26/27o	189	-4	WP_089687185.1			0 0 o	692	165	TANFOR	15	153	2.05e-15
248	246	Pedobacter agri PB92	NZ_AJLG01000013.1	12644	17566	+	WP_010599658.1	22-162: TIGR02542 (T_forsyth_147, TANFOR domain.); 1256-1331: cl21470 (Peptidase_M14NE-CP-C_like, Peptidase associated domain: C-terminal domain of M14 N/E carboxypeptidase; putative folding, regulation, or interaction domain.)	Neg: SP(Sec/SPI) (Pr: 0.967), Pos: SP(Sec/SPI) (Pr: 0.935)	0 Y n4-15c22/23o	1640	WP_010599657.1		Neg: SP(Sec/SPI) (Pr: 0.992), Pos: SP(Sec/SPI) (Pr: 0.976)	0 Y n11-21c26/27o	571	2	WP_010599659.1			0 0 o	530	-89	WP_029204082.1			0 0 o	653	57	TANFOR	22	162	7.94e-16
249	394	bacterium A37T11	NZ_FOBR01000005.1	213652	221124	-	WP_092390341.1			0 0 o	2490	WP_092390342.1		Neg: SP(Sec/SPI) (Pr: 0.572), Pos: SP(Sec/SPI) (Pr: 0.619)	0 Y n10-21c25/26o	570	62	WP_092390340.1	386-648: COG3401 (FN3, Fibronectin type 3 domain [General function prediction only].)		0 0 o	651	39					0	0	TANFOR	9	126	1.09e-09
250	215	Leadbetterella byssophila DSM 17132	NC_014655.1	3372050	3377935	-	WP_013409685.1	19-137: TIGR02542 (T_forsyth_147, TANFOR domain.)	Neg: SP(Sec/SPI) (Pr: 0.994), Pos: SP(Sec/SPI) (Pr: 0.814)	0 Y n5-15c19/20o	1961	WP_013409686.1		Neg: SP(Sec/SPI) (Pr: 0.962), Pos: SP(Sec/SPI) (Pr: 0.473)	0 Y n3-10c15/16o	528	4	WP_041823763.1	312-624: COG3401 (FN3, Fibronectin type 3 domain [General function prediction only].)	Neg: SP(Sec/SPI) (Pr: 0.852), Pos: SP(Sec/SPI) (Pr: 0.847)	0 Y n4-15c24/25o	629	-1	WP_013409683.1		Neg: LIPO(Sec/SPII) (Pr: 0.978), Pos: LIPO(Sec/SPII) (Pr: 0.932)	0 Y n4-14c18/19o	953	2	TANFOR	19	137	2.51e-15
251	307	Pseudarcicella hirudinis E92,LMG 26720,CCM 7988	NZ_FOXH01000001.1	76197	82337	+	WP_092010404.1	44-174: TIGR02542 (T_forsyth_147, TANFOR domain.)		0 Y n26-34c40/41o	2046	WP_092010402.1		Neg: SP(Sec/SPI) (Pr: 0.993), Pos: SP(Sec/SPI) (Pr: 0.957)	0 Y n3-14c19/20o	562	5	WP_092010407.1	387-665: COG3401 (FN3, Fibronectin type 3 domain [General function prediction only].)	Neg: SP(Sec/SPI) (Pr: 0.921), Pos: SP(Sec/SPI) (Pr: 0.737)	0 Y n4-14c19/20o	668	62					0	0	TANFOR	44	174	1.27e-20
252	394	bacterium A37T11	NZ_FOBR01000024.1	26075	32560	+	WP_092393628.1	1263-1336: pfam13620 (CarboxypepD_reg, Carboxypeptidase regulatory-like domain.); 31-156: TIGR02542 (T_forsyth_147, TANFOR domain.)	Neg: SP(Sec/SPI) (Pr: 0.988), Pos: SP(Sec/SPI) (Pr: 0.989)	0 Y n11-22c29/30o	2161	WP_092393625.1		Neg: SP(Sec/SPI) (Pr: 0.989), Pos: SP(Sec/SPI) (Pr: 0.988)	0 Y n15-23c31/32o	576	2	WP_092393631.1		Neg: LIPO(Sec/SPII) (Pr: 0.569), Pos: LIPO(Sec/SPII) (Pr: 0.487)	0 Y n2-12c17/18o	670	24					0	0	TANFOR	31	156	8.08e-11
253	173	Lewinella cohaerens DSM 23179	NZ_KB903540.1	108510	114377	-	WP_020536064.1	25-159: TIGR02542 (T_forsyth_147, TANFOR domain.)	Neg: SP(Sec/SPI) (Pr: 0.674), Pos: SP(Sec/SPI) (Pr: 0.508)	0 Y n7-18c22/23o	1955	WP_020536066.1	2-361: cd03809 (GT4_MtfB-like, glycosyltransferases MtfB, WbpX, and similar proteins.)		0 0 o	371	314	WP_020536063.1		Neg: SP(Sec/SPI) (Pr: 0.893), Pos: SP(Sec/SPI) (Pr: 0.784)	0 Y n4-14c19/20o	692	125	WP_020536062.1		Neg: SP(Sec/SPI) (Pr: 0.597), Pos: SP(Sec/SPI) (Pr: 0.628)	0 Y n6-17c22/23o	558	97	TANFOR	25	159	3.01e-11
254	183	Chitinophaga pinensis DSM 2588	NC_013132.1	3412869	3418973	+	WP_012790431.1	1932-2031: pfam14424 (Toxin-deaminase, The BURPS668_1122 family of deaminases.); 307-391: cd00063 (FN3, Fibronectin type 3 domain; One of three types of internal repeats found in the plasma protein fibronectin.); 28-154: TIGR02542 (T_forsyth_147, TANFOR domain.)	Neg: SP(Sec/SPI) (Pr: 0.975), Pos: SP(Sec/SPI) (Pr: 0.945)	0 Y n8-18c23/24o	2034	WP_044218632.1			0 0 o	581	20	WP_012790432.1	24-140: pfam09346 (SMI1_KNR4, SMI1 / KNR4 family (SUKH-1).)		0 0 o	159	-1					0	0	TANFOR	28	154	7.8e-11
255	400	Chitinophaga sp. YR627	NZ_FOUX01000007.1	59054	65158	+	WP_089815060.1	1925-2031: pfam14424 (Toxin-deaminase, The BURPS668_1122 family of deaminases.); 307-391: cd00063 (FN3, Fibronectin type 3 domain; One of three types of internal repeats found in the plasma protein fibronectin.); 28-154: TIGR02542 (T_forsyth_147, TANFOR domain.)	Neg: SP(Sec/SPI) (Pr: 0.942), Pos: SP(Sec/SPI) (Pr: 0.921)	0 Y n8-18c23/24o	2034	WP_089815058.1			0 0 o	585	20	WP_089815062.1	27-140: cl01747 (SMI1_KNR4, SMI1 / KNR4 family (SUKH-1).)		0 0 o	159	-1					0	0	TANFOR	28	154	1.07e-10
256	413	[Flexibacter] sp. ATCC 35208	NZ_MTKN01000069.1	30468	35912	+	WP_083729676.1			0 0 o	1814	WP_083729675.1	1150-1225: TIGR04183 (Por_Secre_tail, Por secretion system C-terminal sorting domain.)	Neg: SP(Sec/SPI) (Pr: 0.808), Pos: SP(Sec/SPI) (Pr: 0.777)	0 Y n3-14c18/19o	1228	112	WP_083729677.1			0 0 i	157	3	WP_083729685.1	2-136: TIGR02937 (sigma70-ECF, RNA polymerase sigma factor, sigma-70 family.)		0 0 o	143	147	TANFOR	8	147	5.53e-10
257	478	Chitinophaga sp. K20C18050901	NZ_QTJV01000012.1	40629	46094	+	WP_116856430.1			0 0 o	1821	WP_116856429.1	1149-1224: TIGR04183 (Por_Secre_tail, Por secretion system C-terminal sorting domain.)	Neg: SP(Sec/SPI) (Pr: 0.811), Pos: SP(Sec/SPI) (Pr: 0.887)	0 Y n3-14c26/27o	1227	76	WP_116856431.1			0 0 o	157	-1	WP_116856432.1	1-160: COG1595 (RpoE, DNA-directed RNA polymerase specialized sigma subunit, sigma24 family [Transcription].)		0 0 o	166	78	TANFOR	15	154	2.87e-09
258	554	Chitinophaga sp. BN140078	NZ_VUOC01000002.1	512585	519199	-	WP_149837612.1	1887-2199: BaCT; 312-392: cd00063 (FN3, Fibronectin type 3 domain; One of three types of internal repeats found in the plasma protein fibronectin.); 28-151: TIGR02542 (T_forsyth_147, TANFOR domain.)	Neg: SP(Sec/SPI) (Pr: 0.951), Pos: SP(Sec/SPI) (Pr: 0.926)	0 Y n8-15c23/24o	2204	WP_149837613.1		Neg: SP(Sec/SPI) (Pr: 0.850), Pos: SP(Sec/SPI) (Pr: 0.883)	0 Y n8-18c23/24o	593	26	WP_149837611.1			0 0 o	343	-4					0	0	TANFOR	28	151	2.15e-11
259	399	Chitinophaga sp. YR573	NZ_FOJF01000002.1	1339097	1345708	+	WP_089785223.1	1887-2200: BaCT; 303-393: cd00063 (FN3, Fibronectin type 3 domain; One of three types of internal repeats found in the plasma protein fibronectin.); 28-154: TIGR02542 (T_forsyth_147, TANFOR domain.)	Neg: SP(Sec/SPI) (Pr: 0.996), Pos: SP(Sec/SPI) (Pr: 0.984)	0 Y n7-18c23/24o	2203	WP_089785220.1	1463-1493: pfam13573 (SprB, SprB repeat.)	Neg: SP(Sec/SPI) (Pr: 0.765), Pos: SP(Sec/SPI) (Pr: 0.926)	0 Y n6-17c25/26o	1783	79	WP_089785225.1			0 0 o	352	3	WP_089785227.1	46-279: cl23725 (Glyco_hydro_1, Glycosyl hydrolase family 1.)	Neg: LIPO(Sec/SPII) (Pr: 0.998), Pos: LIPO(Sec/SPII) (Pr: 0.997)	0 Y n6-15c19/20o	291	75	TANFOR	28	154	8.01e-11
260	468	Chitinophaga sp. GDMCC 1.1325	NZ_QFFJ01000002.1	2543522	2549158	+	WP_113618742.1	1837-1869: pfam14414 (WHH, A nuclease of the HNH/ENDO VII superfamily with conserved WHH.); 329-418: cd00063 (FN3, Fibronectin type 3 domain; One of three types of internal repeats found in the plasma protein fibronectin.)	Neg: SP(Sec/SPI) (Pr: 0.530), Pos: SP(Sec/SPI) (Pr: 0.686)	0 Y n32-42c48/49o	1878	WP_113618741.1	1710-1785: TIGR04183 (Por_Secre_tail, Por secretion system C-terminal sorting domain.)	Neg: SP(Sec/SPI) (Pr: 0.538), Pos: LIPO(Sec/SPII) (Pr: 0.547)	0 Y n7-18c23/24o	1787	-38	WP_113618743.1			0 0 o	191	62					0	0	TANFOR	53	179	2.54e-09
261	198	Chitinophaga filiformis DSM 527	NZ_FNBN01000003.1	625370	630160	+	WP_089833053.1		Neg: SP(Sec/SPI) (Pr: 0.972), Pos: SP(Sec/SPI) (Pr: 0.960)	0 Y n15-23c29/30o	1596	WP_089833051.1			1 0 i39-58o	1829	67	WP_089833055.1	43-184: pfam13523 (Acetyltransf_8, Acetyltransferase (GNAT) domain.)		0 0 o	215	278	WP_089833057.1	13-602: COG4264 (RhbC, Siderophore synthetase component [Inorganic ion transport and metabolism].)		0 0 o	609	32	TANFOR	37	160	3e-10
262	518	Chitinophaga pinensis 1204	NZ_VIWA01000012.1	89403	95060	-	WP_146971646.1	25-164: TIGR02542 (T_forsyth_147, TANFOR domain.)	Neg: SP(Sec/SPI) (Pr: 0.619), Pos: SP(Sec/SPI) (Pr: 0.498)	0 Y n4-15c20/21o	1885	WP_146971647.1	1152-1227: TIGR04183 (Por_Secre_tail, Por secretion system C-terminal sorting domain.)	Neg: SP(Sec/SPI) (Pr: 0.899), Pos: SP(Sec/SPI) (Pr: 0.919)	0 Y n3-14c18/19o	1230	60	WP_146971645.1			0 0 o	135	68	WP_146971644.1	5-159: TIGR02937 (sigma70-ECF, RNA polymerase sigma factor, sigma-70 family.)		0 0 o	166	79	TANFOR	25	164	4.34e-12
263	399	Chitinophaga sp. YR573	NZ_FOJF01000002.1	859710	865676	+	WP_089784426.1	310-394: cd00063 (FN3, Fibronectin type 3 domain; One of three types of internal repeats found in the plasma protein fibronectin.)	Neg: SP(Sec/SPI) (Pr: 0.992), Pos: SP(Sec/SPI) (Pr: 0.969)	0 Y n12-20c25/26o	1988	WP_089784424.1		Neg: SP(Sec/SPI) (Pr: 0.975), Pos: SP(Sec/SPI) (Pr: 0.913)	0 Y n7-18c23/24o	583	2	WP_089784428.1			0 0 o	140	3	WP_089784430.1			0 0 o	222	517	TANFOR	30	156	2.88e-10
264	403	Chitinophaga sp. CF118	NZ_FOMK01000002.1	468473	473962	-	WP_090102471.1	309-393: cd00063 (FN3, Fibronectin type 3 domain; One of three types of internal repeats found in the plasma protein fibronectin.)	Neg: SP(Sec/SPI) (Pr: 0.969), Pos: SP(Sec/SPI) (Pr: 0.956)	0 Y n8-20c24/25o	1829	WP_090102473.1		Neg: SP(Sec/SPI) (Pr: 0.975), Pos: SP(Sec/SPI) (Pr: 0.851)	0 Y n4-14c19/20o	577	2	WP_090102469.1			0 0 o	144	57	WP_090102467.1			0 0 o	168	41	TANFOR	29	152	4.47e-09
265	468	Chitinophaga sp. GDMCC 1.1325	NZ_QFFJ01000002.1	3287407	3294012	+	WP_113619177.1	1896-2200: BaCT; 302-395: cd00063 (FN3, Fibronectin type 3 domain; One of three types of internal repeats found in the plasma protein fibronectin.)	Neg: SP(Sec/SPI) (Pr: 0.995), Pos: SP(Sec/SPI) (Pr: 0.984)	0 Y n9-17c25/26o	2201	WP_113619176.1	1717-1793: TIGR04183 (Por_Secre_tail, Por secretion system C-terminal sorting domain.)	Neg: SP(Sec/SPI) (Pr: 0.658), Pos: SP(Sec/SPI) (Pr: 0.779)	0 Y n7-18c26/27o	1794	28	WP_113619178.1			0 0 o	354	-1	WP_113619179.1	1-161: COG2353 (YceI, Polyisoprenoid-binding periplasmic protein YceI [General function prediction only].)	Neg: SP(Sec/SPI) (Pr: 0.802), Pos: SP(Sec/SPI) (Pr: 0.827)	0 Y n8-19c24/25o	178	127	TANFOR	30	156	4.79e-10
266	293	Fulvivirga imtechensis AK7	NZ_AMZN01000033.1	62312	66178	-	WP_040496385.1	43-181: TIGR02542 (T_forsyth_147, TANFOR domain.); 327-404: cd00063 (FN3, Fibronectin type 3 domain; One of three types of internal repeats found in the plasma protein fibronectin.)	Pos: SP(Sec/SPI) (Pr: 0.633)	0 Y n18-30c38/39o	1288	WP_040496387.1	1341-1417: TIGR04183 (Por_Secre_tail, Por secretion system C-terminal sorting domain.); 1019-1050: pfam13573 (SprB, SprB repeat.)	Neg: SP(Sec/SPI) (Pr: 0.731), Pos: SP(Sec/SPI) (Pr: 0.841)	0 Y n16-27c32/33o	1418	-4	WP_009579713.1	162-323: cl11493 (PQQ_DH_like, PQQ-dependent dehydrogenases and related proteins.)	Neg: SP(Sec/SPI) (Pr: 0.630), Pos: SP(Sec/SPI) (Pr: 0.708)	0 Y n3-14c19/20o	375	12	WP_009579712.1	139-311: pfam13360 (PQQ_2, PQQ-like domain.)	Neg: SP(Sec/SPI) (Pr: 0.947), Pos: SP(Sec/SPI) (Pr: 0.665)	0 Y n3-14c22/23o	363	1	TANFOR	43	181	5.07e-12
267	372	Niastella vici DJ57	NZ_LVYD01000049.1	11613	13862	-	WP_081148403.1	306-391: cd00063 (FN3, Fibronectin type 3 domain; One of three types of internal repeats found in the plasma protein fibronectin.); 34-162: TIGR02542 (T_forsyth_147, TANFOR domain.)	Neg: SP(Sec/SPI) (Pr: 0.981), Pos: SP(Sec/SPI) (Pr: 0.966)	0 Y n15-26c31/32o	749	WP_081148405.1	1086-1121: pfam13573 (SprB, SprB repeat.)	Neg: SP(Sec/SPI) (Pr: 0.797), Pos: SP(Sec/SPI) (Pr: 0.769)	0 Y n21-31c36/37o	1416	39	WP_081148401.1		Neg: SP(Sec/SPI) (Pr: 0.837), Pos: SP(Sec/SPI) (Pr: 0.904)	0 Y n4-15c23/24o	916	21	WP_081148399.1			0 0 o	162	3	TANFOR	34	162	1.24e-11
268	480	Chryseolinea sp. KIS68-18	NZ_CP032382.1	148365	150743	+	WP_119752492.1	320-401: pfam00041 (fn3, Fibronectin type III domain.)	Neg: SP(Sec/SPI) (Pr: 0.659), Pos: SP(Sec/SPI) (Pr: 0.829)	1 0 i21-42o	792	WP_119752491.1		Neg: SP(Sec/SPI) (Pr: 0.770), Pos: SP(Sec/SPI) (Pr: 0.839)	0 Y n22-33c38/39o	1399	64	WP_119752493.1		Neg: SP(Sec/SPI) (Pr: 0.702), Pos: SP(Sec/SPI) (Pr: 0.573)	1 Y n5-15c19/20o634-653i	936	-4	WP_119752494.1			0 0 i	151	5	TANFOR	48	173	1.74e-09
269	486	Chitinophaga sp. Mgbs1	NZ_RIAR01000028.1	10888	13185	-	WP_127036229.1	39-185: TIGR02542 (T_forsyth_147, TANFOR domain.); 329-389: pfam00041 (fn3, Fibronectin type III domain.)	Neg: SP(Sec/SPI) (Pr: 0.616), Pos: SP(Sec/SPI) (Pr: 0.749)	0 Y n16-27c34/35o	765	WP_127036230.1		Neg: SP(Sec/SPI) (Pr: 0.967), Pos: SP(Sec/SPI) (Pr: 0.908)	0 Y n9-20c25/26o	582	11	WP_127036227.1		Neg: SP(Sec/SPI) (Pr: 0.922), Pos: SP(Sec/SPI) (Pr: 0.886)	0 Y n10-21c26/27o	1088	-1	WP_127036225.1			0 0 o	315	10	TANFOR	39	185	1.95e-16
270	334	Spirosoma oryzae DSM 28354	NZ_PVTE01000008.1	59701	65403	+	WP_106137855.1			0 0 o	1900	WP_106137854.1		Neg: SP(Sec/SPI) (Pr: 0.933), Pos: SP(Sec/SPI) (Pr: 0.670)	0 Y n3-11c15/16o	560	95	WP_106137856.1			0 0 o	714	66	WP_106137857.1	2402-2479: TIGR04183 (Por_Secre_tail, Por secretion system C-terminal sorting domain.); 982-1018: pfam13573 (SprB, SprB repeat.); 681-717: pfam13573 (SprB, SprB repeat.); 832-868: pfam13573 (SprB, SprB repeat.); 1434-1470: pfam13573 (SprB, SprB repeat.); 1283-1319: pfam13573 (SprB, SprB repeat.); 606-642: pfam13573 (SprB, SprB repeat.); 276-356: pfam07679 (I-set, Immunoglobulin I-set domain.)	Neg: SP(Sec/SPI) (Pr: 0.961), Pos: SP(Sec/SPI) (Pr: 0.964)	0 Y n8-19c24/25o	2480	16	TANFOR	23	141	2.61e-08
271	335	Flavisolibacter tropicus LCS9	NZ_CP011390.1	5267196	5271062	+	WP_066407975.1	333-414: cd00063 (FN3, Fibronectin type 3 domain; One of three types of internal repeats found in the plasma protein fibronectin.); 1187-1257: pfam15648 (Tox-REase-5, Restriction endonuclease fold toxin 5.)	Pos: SP(Sec/SPI) (Pr: 0.695)	1 0 i19-37o	1288	WP_066407972.1	1557-1587: pfam13573 (SprB, SprB repeat.); 717-748: pfam13573 (SprB, SprB repeat.)	Neg: SP(Sec/SPI) (Pr: 0.816), Pos: SP(Sec/SPI) (Pr: 0.850)	0 Y n8-20c24/25o	1883	23	WP_066407978.1			1 0 o18-37i	237	7	WP_066407985.1			0 0 o	232	349	TANFOR	45	164	1.38e-08
272	62	Chitinophaga sancti DSM 784	NZ_FPIZ01000010.1	31718	37492	+	WP_072362314.1	25-164: TIGR02542 (T_forsyth_147, TANFOR domain.)	Neg: SP(Sec/SPI) (Pr: 0.967), Pos: SP(Sec/SPI) (Pr: 0.796)	0 Y n4-12c20/21o	1924	WP_072362313.1	1150-1225: TIGR04183 (Por_Secre_tail, Por secretion system C-terminal sorting domain.)	Neg: SP(Sec/SPI) (Pr: 0.876), Pos: SP(Sec/SPI) (Pr: 0.888)	0 Y n3-14c18/19o	1228	56	WP_083571571.1	70-224: TIGR02937 (sigma70-ECF, RNA polymerase sigma factor, sigma-70 family.)		0 0 o	231	357	WP_072362317.1			4 0 i47-64o70-90i127-145o157-177i	201	-11	TANFOR	25	164	1.13e-10
273	479	Chitinophagaceae bacterium K23C18032701	NZ_QTJU01000014.1	63376	68835	-	WP_116849679.1	1545-1819: BaCT; 325-415: cd00063 (FN3, Fibronectin type 3 domain; One of three types of internal repeats found in the plasma protein fibronectin.)	Neg: SP(Sec/SPI) (Pr: 0.953), Pos: SP(Sec/SPI) (Pr: 0.967)	0 Y n26-38c43/44o	1819	WP_116849680.1		Neg: LIPO(Sec/SPII) (Pr: 0.837), Pos: LIPO(Sec/SPII) (Pr: 0.709)	0 Y n13-23c29/30o	586	-1	WP_116849678.1			0 0 o	327	35					0	0	TANFOR	49	172	7.38e-10
274	270	Pedobacter yonginense KCTC22721	NZ_QGNZ01000001.1	476913	482405	+	WP_109924110.1	333-415: cd00063 (FN3, Fibronectin type 3 domain; One of three types of internal repeats found in the plasma protein fibronectin.)		1 0 i40-57o	1830	WP_133248486.1		Neg: SP(Sec/SPI) (Pr: 0.715), Pos: SP(Sec/SPI) (Pr: 0.871)	0 Y n9-20c28/29o	581	0	WP_109924111.1			0 0 o	162	-17	WP_109924112.1			0 0 i	71	87	TANFOR	73	180	5.41e-08
275	262	Chitinophaga rupis DSM 21039	NZ_FOBB01000002.1	1096623	1098860	+	WP_089910822.1	293-378: cd00063 (FN3, Fibronectin type 3 domain; One of three types of internal repeats found in the plasma protein fibronectin.)	Neg: SP(Sec/SPI) (Pr: 0.878), Pos: SP(Sec/SPI) (Pr: 0.884)	0 Y n8-18c23/24o	745	WP_089910819.1		Neg: SP(Sec/SPI) (Pr: 0.652), Pos: SP(Sec/SPI) (Pr: 0.634)	0 Y n12-23c27/28o	573	18	WP_089910824.1	824-908: pfam14436 (EndoU_bacteria, Bacterial EndoU nuclease.)	Neg: SP(Sec/SPI) (Pr: 0.915), Pos: SP(Sec/SPI) (Pr: 0.750)	0 Y n8-19c24/25o	911	-4	WP_089910827.1			0 0 o	140	14	TANFOR	30	162	3.58e-08
276	554	Chitinophaga sp. BN140078	NZ_VUOC01000004.1	434377	436617	-	WP_149839882.1	294-379: cd00063 (FN3, Fibronectin type 3 domain; One of three types of internal repeats found in the plasma protein fibronectin.)	Neg: SP(Sec/SPI) (Pr: 0.915), Pos: SP(Sec/SPI) (Pr: 0.864)	0 Y n8-19c24/25o	746	WP_149839883.1			0 0 o	549	20	WP_149839881.1	808-907: pfam14021 (TNT, Tuberculosis necrotizing toxin.); 1026-1126: pfam14021 (TNT, Tuberculosis necrotizing toxin.)	Neg: SP(Sec/SPI) (Pr: 0.965), Pos: SP(Sec/SPI) (Pr: 0.863)	0 Y n5-16c21/22o	1141	4	WP_149839880.1			0 0 o	175	-4	TANFOR	31	163	5.61e-08
277	421	Geofilum rhodophaeum HF401	NZ_MWUJ01000019.1	10285	14781	-	WP_088655853.1		Neg: SP(Sec/SPI) (Pr: 0.981), Pos: SP(Sec/SPI) (Pr: 0.971)	0 Y n4-15c23/24o	1498	WP_088655854.1		Neg: SP(Sec/SPI) (Pr: 0.990), Pos: SP(Sec/SPI) (Pr: 0.968)	0 Y n3-14c19/20o	2722	9	WP_088655852.1			0 0 o	126	6					0	0	TANFOR	35	155	1.2e-09
278	235	Nubsella zeaxanthinifaciens TDMA-5	NZ_QMHP01000004.1	51360	55607	-	WP_113637147.1	313-397: cd00063 (FN3, Fibronectin type 3 domain; One of three types of internal repeats found in the plasma protein fibronectin.)	Neg: SP(Sec/SPI) (Pr: 0.735), Pos: SP(Sec/SPI) (Pr: 0.890)	0 Y n25-36c44/45o	1415	WP_113637149.1		Neg: SP(Sec/SPI) (Pr: 0.551), Pos: SP(Sec/SPI) (Pr: 0.800)	0 Y n26-36c41/42o	593	3	WP_113637145.1			0 0 o	150	6					0	511	TANFOR	54	162	1.51e-08
279	213	Alkaliflexus imshenetskii DSM 15055 Z-7010	NZ_KI912105.1	1226682	1230287	-	WP_026473681.1		Neg: SP(Sec/SPI) (Pr: 0.603), Pos: SP(Sec/SPI) (Pr: 0.555)	0 Y n5-16c21/22o	1201	WP_026473682.1		Neg: SP(Sec/SPI) (Pr: 0.994), Pos: SP(Sec/SPI) (Pr: 0.972)	0 Y n3-14c19/20o	2710	8	WP_026473680.1			2 0 i7-28o34-56i	140	-1					0	0	TANFOR	30	158	3.38e-08
280	477	Ancylomarina sp. A4	NZ_QTZN01000003.1	24882	29306	+	WP_124991744.1	33-160: TIGR02542 (T_forsyth_147, TANFOR domain.)	Neg: SP(Sec/SPI) (Pr: 0.864), Pos: SP(Sec/SPI) (Pr: 0.926)	0 Y n9-20c28/29o	1474	WP_124991743.1	232-429: cl09821 (Fib_succ_major, Fibrobacter succinogenes major domain (Fib_succ_major).)	Neg: LIPO(Sec/SPII) (Pr: 0.994), Pos: LIPO(Sec/SPII) (Pr: 0.993)	0 Y n8-17c22/23o	430	369	WP_124991745.1		Neg: SP(Sec/SPI) (Pr: 0.874), Pos: SP(Sec/SPI) (Pr: 0.674)	0 Y n5-16c20/21o	450	9	WP_124991746.1	131-213: cd00603 (IPT_PCSR, IPT domain of Plexins and Cell Surface Receptors (PCSR) and related proteins .)	Neg: LIPO(Sec/SPII) (Pr: 0.987), Pos: LIPO(Sec/SPII) (Pr: 0.927)	0 Y n7-18c22/23o	581	605	TANFOR	33	160	4.02e-12
281	256	Solitalea koreensis DSM 21342	NZ_FXSZ01000003.1	110027	114064	+	WP_142602359.1	1205-1339: cd00737 (lyz_endolysin_autolysin, endolysin and autolysin.); 288-374: cd00063 (FN3, Fibronectin type 3 domain; One of three types of internal repeats found in the plasma protein fibronectin.)	Neg: SP(Sec/SPI) (Pr: 0.922), Pos: SP(Sec/SPI) (Pr: 0.822)	0 Y n5-16c21/22o	1345	WP_142602357.1		Neg: SP(Sec/SPI) (Pr: 0.638), Pos: SP(Sec/SPI) (Pr: 0.675)	0 Y n3-13c24/25o	729	25	WP_142602361.1		Neg: LIPO(Sec/SPII) (Pr: 0.881), Pos: LIPO(Sec/SPII) (Pr: 0.895)	0 Y n7-18c23/24o	366	4	WP_142602363.1	5-238: cl23716 (metallo-hydrolase-like_MBL-fold, mainly hydrolytic enzymes and related proteins which carry out various biological functions; MBL-fold metallohydrolase domain.)		0 0 o	242	142	TANFOR	26	152	3e-10
282	515	Fulvivirga sp. M361	NZ_VKDC01000004.1	49518	50948	-	WP_143397022.1	294-369: pfam00041 (fn3, Fibronectin type III domain.)	Pos: SP(Sec/SPI) (Pr: 0.499)	0 Y n9-20c25/26o	476	WP_143397023.1		Neg: SP(Sec/SPI) (Pr: 0.968), Pos: SP(Sec/SPI) (Pr: 0.940)	0 Y n9-21c26/27o	573	4	WP_143397021.1		Neg: SP(Sec/SPI) (Pr: 0.997), Pos: SP(Sec/SPI) (Pr: 0.944)	0 Y n4-14c19/20o	1542	11	WP_143397020.1	333-597: COG3401 (FN3, Fibronectin type 3 domain [General function prediction only].)	Neg: SP(Sec/SPI) (Pr: 0.870), Pos: SP(Sec/SPI) (Pr: 0.919)	1 0 i12-29o	700	20	TANFOR	30	141	4.69e-10
283	331	Chitinophaga jiangningensis DSM 27406	NZ_FRBL01000002.1	273260	275485	-	WP_083549411.1	290-374: cd00063 (FN3, Fibronectin type 3 domain; One of three types of internal repeats found in the plasma protein fibronectin.)	Neg: SP(Sec/SPI) (Pr: 0.914), Pos: SP(Sec/SPI) (Pr: 0.726)	0 Y n9-16c20/21o	741	WP_073078921.1		Neg: SP(Sec/SPI) (Pr: 0.975), Pos: SP(Sec/SPI) (Pr: 0.972)	0 Y n13-23c30/31o	578	3	WP_073078918.1	803-1064: BaCT	Neg: SP(Sec/SPI) (Pr: 0.989), Pos: SP(Sec/SPI) (Pr: 0.982)	0 Y n7-18c23/24o	1065	2	WP_073078916.1			0 0 o	337	2	TANFOR	32	159	5.11e-08
284	203	Sporocytophaga myxococcoides PG-01	NZ_BBLT01000009.1	222568	224757	+	WP_045467302.1	291-374: cd00063 (FN3, Fibronectin type 3 domain; One of three types of internal repeats found in the plasma protein fibronectin.)	Neg: SP(Sec/SPI) (Pr: 0.965), Pos: SP(Sec/SPI) (Pr: 0.917)	0 Y n7-18c23/24o	729	WP_052430367.1			1 0 i12-30o	568	1	WP_045467304.1			3 0 i7-25o432-451i463-481o	841	5	WP_045467306.1			0 0 o	162	11	TANFOR	33	154	1.48e-09
285	469	Pedobacter sp. R-8	NZ_QGNY01000001.1	1019829	1024076	-	WP_109928441.1	1128-1413: cl00222 (Lyz_like, Lysozyme-like domains.); 350-432: cd00063 (FN3, Fibronectin type 3 domain; One of three types of internal repeats found in the plasma protein fibronectin.)		2 0 o33-51i63-83o	1415	WP_109928442.1	218-300: smart00342 (HTH_ARAC, helix_turn_helix, arabinose operon control protein.)		0 0 o	306	329	WP_109928440.1		Neg: LIPO(Sec/SPII) (Pr: 0.487)	0 Y n5-16c20/21o	244	-11					0	0	TANFOR	90	197	2.02e-09
286	444	Chryseolinea flava SDU1-6	NZ_QMFY01000002.1	190800	197354	+	WP_112745954.1	1768-1890: pfam07591 (PT-HINT, Pretoxin HINT domain.); 289-376: cd00063 (FN3, Fibronectin type 3 domain; One of three types of internal repeats found in the plasma protein fibronectin.)	Neg: SP(Sec/SPI) (Pr: 0.969), Pos: SP(Sec/SPI) (Pr: 0.884)	0 Y n4-12c17/18o	2184	WP_133259551.1			0 0 o	548	6	WP_112745955.1			0 0 o	229	5	WP_133259552.1		Neg: SP(Sec/SPI) (Pr: 0.858), Pos: SP(Sec/SPI) (Pr: 0.732)	0 Y n7-18c22/23o	308	-4	TANFOR	29	136	2.08e-08
287	416	Labilibaculum manganireducens 59.10-2M	NZ_MVDE01000018.1	33745	38082	+	WP_101310186.1	33-160: TIGR02542 (T_forsyth_147, TANFOR domain.)	Neg: SP(Sec/SPI) (Pr: 0.915), Pos: SP(Sec/SPI) (Pr: 0.949)	0 Y n9-20c28/29o	1445	WP_101310185.1		Neg: SP(Sec/SPI) (Pr: 0.792), Pos: SP(Sec/SPI) (Pr: 0.839)	0 Y n20-30c35/36o	250	471	WP_101310187.1		Neg: SP(Sec/SPI) (Pr: 0.832), Pos: SP(Sec/SPI) (Pr: 0.574)	0 Y n5-14c18/19o	300	4	WP_101310188.1			0 0 o	796	399	TANFOR	33	160	3.21e-13
288	101	Capnocytophaga canimorsus Cc5	NC_015846.1	1313552	1318567	-	WP_049782700.1	1552-1649: pfam14412 (AHH, A nuclease family of the HNH/ENDO VII superfamily with conserved AHH.)	Neg: SP(Sec/SPI) (Pr: 0.786)	0 Y n7-14c21/22o	1671	WP_081461658.1	408-442: pfam13573 (SprB, SprB repeat.); 774-810: pfam13573 (SprB, SprB repeat.); 1036-1111: TIGR04183 (Por_Secre_tail, Por secretion system C-terminal sorting domain.)	Neg: SP(Sec/SPI) (Pr: 0.891), Pos: SP(Sec/SPI) (Pr: 0.544)	0 Y n4-12c17/18o	1111	115	WP_013997343.1			0 0 i	231	3	WP_041913851.1			0 0 o	111	620	TANFOR	26	165	5.47e-10
289	107	Capnocytophaga canimorsus NCTC11921	NZ_LR134513.1	407503	412512	-	WP_126321267.1	1550-1647: pfam14412 (AHH, A nuclease family of the HNH/ENDO VII superfamily with conserved AHH.)	Neg: SP(Sec/SPI) (Pr: 0.786)	0 Y n7-14c21/22o	1669	WP_081461658.1	408-442: pfam13573 (SprB, SprB repeat.); 774-810: pfam13573 (SprB, SprB repeat.); 1036-1111: TIGR04183 (Por_Secre_tail, Por secretion system C-terminal sorting domain.)	Neg: SP(Sec/SPI) (Pr: 0.891), Pos: SP(Sec/SPI) (Pr: 0.544)	0 Y n4-12c17/18o	1111	115	WP_126321266.1			0 0 i	231	3	WP_082048308.1			0 0 o	113	647	TANFOR	26	141	6.01e-10
290	102	Capnocytophaga canimorsus Cc11	NZ_CDOK01000038.1	1052	2041	-	WP_041984725.1		Neg: SP(Sec/SPI) (Pr: 0.796)	0 Y n7-14c21/22o	329	WP_052461244.1	330-364: pfam13573 (SprB, SprB repeat.); 696-732: pfam13573 (SprB, SprB repeat.); 958-1033: TIGR04183 (Por_Secre_tail, Por secretion system C-terminal sorting domain.)		0 0 o	1033	114	WP_041984722.1			0 0 o	225	25					0	109	TANFOR	26	165	2.37e-09
291	103	Capnocytophaga canimorsus Cc12	NZ_CDOE01000042.1	11330	11941	-	WP_041999182.1		Neg: SP(Sec/SPI) (Pr: 0.857), Pos: SP(Sec/SPI) (Pr: 0.499)	0 Y n7-14c21/22o	203	WP_052456094.1	408-442: pfam13573 (SprB, SprB repeat.); 774-810: pfam13573 (SprB, SprB repeat.); 1036-1111: TIGR04183 (Por_Secre_tail, Por secretion system C-terminal sorting domain.)	Neg: SP(Sec/SPI) (Pr: 0.891), Pos: SP(Sec/SPI) (Pr: 0.544)	0 Y n4-12c17/18o	1111	94	WP_052456093.1			0 0 o	1245	-46	WP_041999179.1			0 0 o	217	57	TANFOR	26	160	7.01e-08
292	108	Capnocytophaga cynodegmi DSM 19736 E6447	NZ_KB900722.1	393	5009	-	WP_018279509.1	1297-1538: BaCT	Neg: SP(Sec/SPI) (Pr: 0.857), Pos: SP(Sec/SPI) (Pr: 0.499)	0 Y n7-14c21/22o	1538	WP_081615898.1	365-440: TIGR04183 (Por_Secre_tail, Por secretion system C-terminal sorting domain.); 103-139: pfam13573 (SprB, SprB repeat.); 27-63: pfam13573 (SprB, SprB repeat.)		0 0 o	440	94	WP_018279508.1			0 0 i	105	1					0	0	TANFOR	26	165	4.92e-08
293	109	Capnocytophaga cynodegmi Ccyn_ATCC49044	NZ_CDOF01000046.1	86946	91562	-	WP_018279509.1	1297-1538: BaCT	Neg: SP(Sec/SPI) (Pr: 0.857), Pos: SP(Sec/SPI) (Pr: 0.499)	0 Y n7-14c21/22o	1538	WP_081615898.1	365-440: TIGR04183 (Por_Secre_tail, Por secretion system C-terminal sorting domain.); 103-139: pfam13573 (SprB, SprB repeat.); 27-63: pfam13573 (SprB, SprB repeat.)		0 0 o	440	94	WP_041996379.1			0 0 i	335	1	WP_018279782.1			0 0 o	156	7	TANFOR	26	165	4.92e-08
294	110	Capnocytophaga cynodegmi Ccy74	NZ_CDOG01000014.1	113090	117706	-	WP_018279509.1	1297-1538: BaCT	Neg: SP(Sec/SPI) (Pr: 0.857), Pos: SP(Sec/SPI) (Pr: 0.499)	0 Y n7-14c21/22o	1538	WP_052457384.1	409-443: pfam13573 (SprB, SprB repeat.); 774-810: pfam13573 (SprB, SprB repeat.); 698-734: pfam13573 (SprB, SprB repeat.); 1036-1111: TIGR04183 (Por_Secre_tail, Por secretion system C-terminal sorting domain.)	Neg: SP(Sec/SPI) (Pr: 0.846), Pos: SP(Sec/SPI) (Pr: 0.532)	0 Y n4-12c17/18o	1111	94	WP_041996379.1			0 0 i	335	1	WP_018279782.1			0 0 o	156	7	TANFOR	26	165	4.92e-08
295	104	Capnocytophaga canimorsus Cc2	NZ_CDOJ01000093.1	17893	22197	+	WP_052521946.1		Neg: SP(Sec/SPI) (Pr: 0.786)	0 Y n7-14c21/22o	1434	WP_044729496.1	291-325: pfam13573 (SprB, SprB repeat.); 657-693: pfam13573 (SprB, SprB repeat.); 919-994: TIGR04183 (Por_Secre_tail, Por secretion system C-terminal sorting domain.)		0 0 o	994	115	WP_044729497.1	68-165: pfam14412 (AHH, A nuclease family of the HNH/ENDO VII superfamily with conserved AHH.)		0 0 o	187	132	WP_044729498.1			0 0 i	231	3	TANFOR	26	141	7.23e-10
296	151	Capnocytophaga haemolytica CCUG 32990	NZ_CP014227.1	501466	506322	-	WP_066428025.1	26-160: TIGR02542 (T_forsyth_147, TANFOR domain.)	Neg: SP(Sec/SPI) (Pr: 0.494), Pos: SP(Sec/SPI) (Pr: 0.618)	0 Y n7-17c21/22o	1618	WP_066431698.1	8-182: cd04179 (DPM_DPG-synthase_like, DPM_DPG-synthase_like is a member of the Glycosyltransferase 2 superfamily.); 264-378: pfam09835 (DUF2062, Uncharacterized protein conserved in bacteria (DUF2062).)		4 0 i213-231o267-293i314-332o352-373i	382	325	WP_066428024.1			0 0 o	169	1					0	17	TANFOR	26	160	9.18e-11
297	152	Capnocytophaga haemolytica NCTC12947	NZ_LT906449.1	1358010	1362866	+	WP_066428025.1	26-160: TIGR02542 (T_forsyth_147, TANFOR domain.)	Neg: SP(Sec/SPI) (Pr: 0.494), Pos: SP(Sec/SPI) (Pr: 0.618)	0 Y n7-17c21/22o	1618	WP_066431698.1	8-182: cd04179 (DPM_DPG-synthase_like, DPM_DPG-synthase_like is a member of the Glycosyltransferase 2 superfamily.); 264-378: pfam09835 (DUF2062, Uncharacterized protein conserved in bacteria (DUF2062).)		4 0 i213-231o267-293i314-332o352-373i	382	325	WP_066428024.1			0 0 o	169	1					0	17	TANFOR	26	160	9.18e-11
298	105	Capnocytophaga canimorsus 7120	NZ_CP022382.1	488364	493535	-	WP_095899931.1		Neg: SP(Sec/SPI) (Pr: 0.857), Pos: SP(Sec/SPI) (Pr: 0.499)	0 Y n7-14c21/22o	1723	WP_052456094.1	408-442: pfam13573 (SprB, SprB repeat.); 774-810: pfam13573 (SprB, SprB repeat.); 1036-1111: TIGR04183 (Por_Secre_tail, Por secretion system C-terminal sorting domain.)	Neg: SP(Sec/SPI) (Pr: 0.891), Pos: SP(Sec/SPI) (Pr: 0.544)	0 Y n4-12c17/18o	1111	94	WP_095899930.1			0 0 o	222	1	WP_041999170.1			0 0 o	123	75	TANFOR	26	165	9.16e-08
299	106	Capnocytophaga canimorsus NCTC12242	NZ_UFUS01000001.1	488364	493535	-	WP_095899931.1		Neg: SP(Sec/SPI) (Pr: 0.857), Pos: SP(Sec/SPI) (Pr: 0.499)	0 Y n7-14c21/22o	1723	WP_052456094.1	408-442: pfam13573 (SprB, SprB repeat.); 774-810: pfam13573 (SprB, SprB repeat.); 1036-1111: TIGR04183 (Por_Secre_tail, Por secretion system C-terminal sorting domain.)	Neg: SP(Sec/SPI) (Pr: 0.891), Pos: SP(Sec/SPI) (Pr: 0.544)	0 Y n4-12c17/18o	1111	94	WP_095899930.1			0 0 o	222	1	WP_041999170.1			0 0 o	123	75	TANFOR	26	165	9.16e-08
300	283	Capnocytophaga sp. oral taxon 338 str. F0234	NZ_GL872413.1	1013647	1017477	-	WP_050784929.1	1149-1257: pfam14412 (AHH, A nuclease family of the HNH/ENDO VII superfamily with conserved AHH.)	Neg: SP(Sec/SPI) (Pr: 0.847), Pos: SP(Sec/SPI) (Pr: 0.691)	0 Y n7-18c22/23o	1276	WP_117601758.1	607-641: pfam13573 (SprB, SprB repeat.); 684-719: pfam13573 (SprB, SprB repeat.); 325-359: pfam13573 (SprB, SprB repeat.)		0 0 o	1021	12					0	-4	WP_117601757.1			0 0 o	151	9	TANFOR	25	159	4.79e-08
301	425	Sphingobacteriaceae bacterium GW460-11-11-14-LB5	NZ_CP021237.1	1839728	1845820	+	WP_086545912.1		Neg: SP(Sec/SPI) (Pr: 0.559), Pos: SP(Sec/SPI) (Pr: 0.822)	0 Y n16-27c32/33o	2030	WP_086545911.1			0 0 o	547	18	WP_086545913.1		Neg: SP(Sec/SPI) (Pr: 0.984), Pos: SP(Sec/SPI) (Pr: 0.901)	0 Y n4-15c20/21o	506	10					0	0	TANFOR	35	161	5.7e-08
302	458	Pedobacter sp. OK291	NZ_QBKL01000013.1	649837	655929	-	WP_108199040.1		Neg: LIPO(Sec/SPII) (Pr: 0.678), Pos: LIPO(Sec/SPII) (Pr: 0.557)	0 Y n16-27c32/33o	2030	WP_108199041.1		Neg: SP(Sec/SPI) (Pr: 0.747), Pos: SP(Sec/SPI) (Pr: 0.528)	0 Y n4-15c19/20o	557	18	WP_108199039.1			0 0 o	478	90					0	0	TANFOR	35	161	2.85e-08
303	472	Pedobacter chitinilyticus CM134L-2	NZ_QMHN01000002.1	232046	239128	-	WP_113646787.1		Neg: SP(Sec/SPI) (Pr: 0.745), Pos: SP(Sec/SPI) (Pr: 0.932)	0 Y n14-25c32/33o	2360	WP_113646788.1		Neg: SP(Sec/SPI) (Pr: 0.934), Pos: SP(Sec/SPI) (Pr: 0.782)	0 Y n4-15c20/21o	558	18	WP_113646786.1		Neg: SP(Sec/SPI) (Pr: 0.948), Pos: SP(Sec/SPI) (Pr: 0.946)	0 Y n16-26c30/31o	677	2					0	0	TANFOR	40	166	1.93e-08
304	473	Pedobacter chitinilyticus CM134L-2	NZ_SAYW01000002.1	232046	239128	-	WP_113646787.1		Neg: SP(Sec/SPI) (Pr: 0.745), Pos: SP(Sec/SPI) (Pr: 0.932)	0 Y n14-25c32/33o	2360	WP_113646788.1		Neg: SP(Sec/SPI) (Pr: 0.934), Pos: SP(Sec/SPI) (Pr: 0.782)	0 Y n4-15c20/21o	558	18	WP_113646786.1		Neg: SP(Sec/SPI) (Pr: 0.948), Pos: SP(Sec/SPI) (Pr: 0.946)	0 Y n16-26c30/31o	677	2					0	0	TANFOR	40	166	1.93e-08
305	250	Filimonas lacunae NBRC 104114	NZ_AP017422.1	7388955	7396025	+	WP_076377055.1	1287-1340: pfam13620 (CarboxypepD_reg, Carboxypeptidase regulatory-like domain.)	Neg: SP(Sec/SPI) (Pr: 0.792), Pos: SP(Sec/SPI) (Pr: 0.724)	0 Y n7-18c23/24o	2356	WP_084206079.1		Neg: SP(Sec/SPI) (Pr: 0.990), Pos: SP(Sec/SPI) (Pr: 0.874)	0 Y n4-15c20/21o	560	31	WP_076377057.1	376-643: COG3401 (FN3, Fibronectin type 3 domain [General function prediction only].); 108-463: COG3401 (FN3, Fibronectin type 3 domain [General function prediction only].)	Neg: SP(Sec/SPI) (Pr: 0.972), Pos: SP(Sec/SPI) (Pr: 0.851)	0 Y n6-16c20/21o	666	11	WP_084206080.1	34-211: COG1595 (RpoE, DNA-directed RNA polymerase specialized sigma subunit, sigma24 family [Transcription].)		0 0 o	213	93	TANFOR	23	138	6.91e-08
306	251	Filimonas lacunae DSM 21054	NZ_FTOR01000001.1	1788438	1795508	+	WP_076377055.1	1287-1340: pfam13620 (CarboxypepD_reg, Carboxypeptidase regulatory-like domain.)	Neg: SP(Sec/SPI) (Pr: 0.792), Pos: SP(Sec/SPI) (Pr: 0.724)	0 Y n7-18c23/24o	2356	WP_084206079.1		Neg: SP(Sec/SPI) (Pr: 0.990), Pos: SP(Sec/SPI) (Pr: 0.874)	0 Y n4-15c20/21o	560	31	WP_076377057.1	376-643: COG3401 (FN3, Fibronectin type 3 domain [General function prediction only].); 108-463: COG3401 (FN3, Fibronectin type 3 domain [General function prediction only].)	Neg: SP(Sec/SPI) (Pr: 0.972), Pos: SP(Sec/SPI) (Pr: 0.851)	0 Y n6-16c20/21o	666	11	WP_084206080.1	34-211: COG1595 (RpoE, DNA-directed RNA polymerase specialized sigma subunit, sigma24 family [Transcription].)		0 0 o	213	93	TANFOR	23	138	6.91e-08
307	385	Mucilaginibacter pedocola TBZ30	NZ_MBTF01000012.1	202198	209418	-	WP_078348278.1		Neg: SP(Sec/SPI) (Pr: 0.659), Pos: SP(Sec/SPI) (Pr: 0.841)	0 Y n14-23c30/31o	2406	WP_078348279.1		Neg: SP(Sec/SPI) (Pr: 0.861), Pos: SP(Sec/SPI) (Pr: 0.691)	0 Y n7-17c22/23o	559	6	WP_078348277.1	380-659: COG3401 (FN3, Fibronectin type 3 domain [General function prediction only].)	Neg: SP(Sec/SPI) (Pr: 0.997), Pos: SP(Sec/SPI) (Pr: 0.972)	0 Y n4-14c19/20o	662	1					0	0	TANFOR	33	159	5.57e-08
308	215	Leadbetterella byssophila DSM 17132	NC_014655.1	734846	740971	-	WP_013407495.1		Neg: SP(Sec/SPI) (Pr: 0.987), Pos: SP(Sec/SPI) (Pr: 0.914)	0 Y n4-15c19/20o	2041	WP_013407496.1		Neg: SP(Sec/SPI) (Pr: 0.961), Pos: SP(Sec/SPI) (Pr: 0.639)	0 Y n6-15c19/20o	559	6	WP_013407494.1		Neg: SP(Sec/SPI) (Pr: 0.990), Pos: SP(Sec/SPI) (Pr: 0.917)	0 Y n4-12c16/17o	676	-4	WP_013407493.1		Neg: LIPO(Sec/SPII) (Pr: 0.998), Pos: LIPO(Sec/SPII) (Pr: 0.990)	0 Y n4-12c16/17o	747	7	TANFOR	23	141	1.47e-10
309	215	Leadbetterella byssophila DSM 17132	NC_014655.1	748983	755156	-	WP_013407500.1		Neg: SP(Sec/SPI) (Pr: 0.969), Pos: SP(Sec/SPI) (Pr: 0.807)	0 Y n4-15c19/20o	2057	WP_013407501.1		Neg: LIPO(Sec/SPII) (Pr: 0.581), Pos: LIPO(Sec/SPII) (Pr: 0.551)	0 Y n5-15c19/20o	559	5	WP_013407499.1	226-579: COG3401 (FN3, Fibronectin type 3 domain [General function prediction only].)	Neg: SP(Sec/SPI) (Pr: 0.991), Pos: SP(Sec/SPI) (Pr: 0.926)	0 Y n4-12c17/18o	675	3	WP_013407498.1		Neg: LIPO(Sec/SPII) (Pr: 0.993), Pos: LIPO(Sec/SPII) (Pr: 0.965)	0 Y n4-11c15/16o	752	6	TANFOR	23	144	6.29e-08
310	474	Dyadobacter sp. RS19	NZ_QNUL01000003.1	300797	306649	+	WP_115829823.1	21-147: TIGR02542 (T_forsyth_147, TANFOR domain.); 801-866: pfam13715 (CarbopepD_reg_2, CarboxypepD_reg-like domain.)	Neg: SP(Sec/SPI) (Pr: 0.594), Pos: LIPO(Sec/SPII) (Pr: 0.589)	0 Y n4-15c19/20o	1950	WP_115829909.1		Neg: SP(Sec/SPI) (Pr: 0.991), Pos: SP(Sec/SPI) (Pr: 0.968)	0 Y n3-14c21/22o	561	4	WP_115829824.1		Neg: SP(Sec/SPI) (Pr: 0.953), Pos: SP(Sec/SPI) (Pr: 0.966)	0 Y n3-14c21/22o	677	-1	WP_115829825.1		Neg: LIPO(Sec/SPII) (Pr: 0.979), Pos: LIPO(Sec/SPII) (Pr: 0.978)	0 Y n7-17c21/22o	441	41	TANFOR	21	147	7.48e-14
311	507	Dyadobacter sp. AR-3-6	NZ_SMFL01000005.1	558789	564620	-	WP_131959398.1	21-147: TIGR02542 (T_forsyth_147, TANFOR domain.)	Neg: SP(Sec/SPI) (Pr: 0.926), Pos: SP(Sec/SPI) (Pr: 0.576)	0 Y n4-15c19/20o	1943	WP_131959399.1		Neg: SP(Sec/SPI) (Pr: 0.994), Pos: SP(Sec/SPI) (Pr: 0.968)	0 Y n5-16c21/22o	561	4	WP_131959397.1		Neg: SP(Sec/SPI) (Pr: 0.609), Pos: SP(Sec/SPI) (Pr: 0.462)	0 Y n6-17c21/22o	677	1	WP_131959396.1		Neg: LIPO(Sec/SPII) (Pr: 0.994), Pos: LIPO(Sec/SPII) (Pr: 0.997)	0 Y n3-15c20/21o	443	69	TANFOR	21	147	9.72e-13
312	298	Chryseolinea serpens DSM 24574	NZ_FQWQ01000005.1	426985	433368	-	WP_073141964.1	186-324: TIGR02542 (T_forsyth_147, TANFOR domain.); 338-480: TIGR02542 (T_forsyth_147, TANFOR domain.)	Neg: SP(Sec/SPI) (Pr: 0.793), Pos: SP(Sec/SPI) (Pr: 0.810)	0 Y n11-22c26/27o	2127	WP_073141966.1		Neg: SP(Sec/SPI) (Pr: 0.918), Pos: SP(Sec/SPI) (Pr: 0.828)	0 Y n7-18c23/24o	562	25	WP_073141962.1			0 Y n13-21c39/40o	159	77	WP_073141960.1		Neg: SP(Sec/SPI) (Pr: 0.991), Pos: SP(Sec/SPI) (Pr: 0.917)	0 Y n3-14c19/20o	720	2	TANFOR, TANFOR, TANFOR	33	480	6.42e-17, 1.81e-12, 6.03e-09
313	304	Riemerella columbipharyngis DSM 24015	NZ_FNAS01000020.1	19342	24003	+	WP_092737771.1	1438-1528: pfam14412 (AHH, A nuclease family of the HNH/ENDO VII superfamily with conserved AHH.)	Neg: SP(Sec/SPI) (Pr: 0.631), Pos: SP(Sec/SPI) (Pr: 0.852)	0 Y n17-28c34/35o	1553	WP_092737769.1		Neg: SP(Sec/SPI) (Pr: 0.987), Pos: SP(Sec/SPI) (Pr: 0.792)	0 Y n5-14c19/20o	1561	24	WP_092737773.1			0 0 i	226	3	WP_092737775.1			0 0 i	229	82	TANFOR	45	173	2.34e-10
314	494	Candidatus Ornithobacterium hominis OH-22767	NZ_UNSC01000004.1	202498	205740	-	WP_133298014.1	543-614: NF000535 (MSCRAMM_SdrC, MSCRAMM family adhesin SdrC.); 327-392: cd00063 (FN3, Fibronectin type 3 domain; One of three types of internal repeats found in the plasma protein fibronectin.)		0 Y n32-43c50/51o	1080	WP_119059456.1		Pos: SP(Sec/SPI) (Pr: 0.430)	0 Y n4-15c20/21o	1560	9	WP_119059454.1			2 0 o12-34i142-161o	166	-23	WP_119059453.1		Neg: SP(Sec/SPI) (Pr: 0.996), Pos: SP(Sec/SPI) (Pr: 0.845)	0 Y n6-14c20/21o	231	-4	TANFOR	61	172	1.6e-10
315	71	Marivirga sericea DSM 4125	NZ_FXAW01000001.1	254057	258496	+	WP_085515242.1	28-142: TIGR02542 (T_forsyth_147, TANFOR domain.)	Neg: SP(Sec/SPI) (Pr: 0.991), Pos: SP(Sec/SPI) (Pr: 0.974)	0 Y n7-18c23/24o	1479	WP_085515241.1	1-114: PRK12275 (PRK12275, hypothetical protein; Reviewed)		0 0 o	118	191	WP_085515243.1			3 0 i12-30o42-64i71-88o	201	-14					0	0	TANFOR	28	142	1.87e-11
316	444	Chryseolinea flava SDU1-6	NZ_QMFY01000033.1	3272	5113	-	WP_112750165.1	291-375: cd00063 (FN3, Fibronectin type 3 domain; One of three types of internal repeats found in the plasma protein fibronectin.)	Neg: SP(Sec/SPI) (Pr: 0.947), Pos: SP(Sec/SPI) (Pr: 0.737)	0 Y n6-16c21/22o	613	WP_112750166.1		Neg: SP(Sec/SPI) (Pr: 0.706), Pos: SP(Sec/SPI) (Pr: 0.616)	0 Y n8-19c25/26o	574	18	WP_112750164.1	1-159: BaCT		0 0 o	159	-7	WP_112750163.1			0 0 o	336	2	TANFOR	32	158	9.79e-08
317	172	Flexithrix dorotheae DSM 6795	NZ_KB903469.1	8372	12718	-	WP_020531874.1		Neg: SP(Sec/SPI) (Pr: 0.455), Pos: SP(Sec/SPI) (Pr: 0.702)	0 Y n9-20c25/26o	1448	WP_020531875.1		Neg: SP(Sec/SPI) (Pr: 0.728), Pos: SP(Sec/SPI) (Pr: 0.786)	0 Y n9-23c27/28o	561	35	WP_020531873.1	329-551: COG3401 (FN3, Fibronectin type 3 domain [General function prediction only].)		0 0 o	648	37	WP_020531872.1	187-361: cl26890 (Collar, Phage Tail Collar Domain.)	Neg: SP(Sec/SPI) (Pr: 0.887), Pos: SP(Sec/SPI) (Pr: 0.908)	0 Y n13-23c27/28o	364	-8	TANFOR	34	159	1.66e-09
318	553	Imperialibacter sp. EC-SDR9 IMPR6	NZ_LR701637.1	45225	50327	+	WP_152001232.1		Neg: SP(Sec/SPI) (Pr: 0.975), Pos: SP(Sec/SPI) (Pr: 0.904)	0 Y n10-20c25/26o	1700	WP_152001231.1	107-329: pfam13360 (PQQ_2, PQQ-like domain.)		0 0 o	685	47	WP_152001233.1		Neg: SP(Sec/SPI) (Pr: 0.669), Pos: SP(Sec/SPI) (Pr: 0.759)	0 Y n4-15c19/20o	310	16	WP_152001234.1	421-494: TIGR04183 (Por_Secre_tail, Por secretion system C-terminal sorting domain.)		0 0 o	494	18	TANFOR	40	169	4.83e-10
319	57	Marinilabilia salmonicolor JCM 21150	NZ_BALK01000001.1	294719	297754	+	WP_025006671.1	32-182: TIGR02542 (T_forsyth_147, TANFOR domain.)	Neg: SP(Sec/SPI) (Pr: 0.954), Pos: SP(Sec/SPI) (Pr: 0.970)	1 Y n10-21c27/28o987-1010i	1011	WP_036162553.1		Neg: LIPO(Sec/SPII) (Pr: 0.998), Pos: LIPO(Sec/SPII) (Pr: 0.999)	0 Y n9-20c25/26o	659	485	WP_025006672.1			0 0 o	135	65	WP_036162557.1			0 0 o	831	-25	TANFOR	32	182	8.93e-14
320	56	Marinilabilia salmonicolor JCM 21150	NZ_AJKI01000002.1	362997	368978	-	WP_010662230.1	32-182: TIGR02542 (T_forsyth_147, TANFOR domain.)	Neg: SP(Sec/SPI) (Pr: 0.954), Pos: SP(Sec/SPI) (Pr: 0.970)	0 Y n10-21c27/28o	1993	WP_010662231.1		Neg: LIPO(Sec/SPII) (Pr: 0.996), Pos: LIPO(Sec/SPII) (Pr: 0.937)	0 Y n3-11c16/17o	650	485	WP_010662229.1		Neg: SP(Sec/SPI) (Pr: 0.982), Pos: SP(Sec/SPI) (Pr: 0.829)	0 Y n3-13c19/20o	686	11	WP_029510240.1		Neg: SP(Sec/SPI) (Pr: 0.783), Pos: SP(Sec/SPI) (Pr: 0.589)	0 Y n5-12c19/20o	553	74	TANFOR	32	182	4.45e-13
321	173	Lewinella cohaerens DSM 23179	NZ_KB903576.1	263062	269631	+	WP_020538784.1	288-372: cd00063 (FN3, Fibronectin type 3 domain; One of three types of internal repeats found in the plasma protein fibronectin.)	Neg: SP(Sec/SPI) (Pr: 0.774), Pos: SP(Sec/SPI) (Pr: 0.964)	0 Y n4-19c29/30o	2189	WP_020538783.1		Neg: SP(Sec/SPI) (Pr: 0.958), Pos: SP(Sec/SPI) (Pr: 0.959)	0 Y n9-22c26/27o	588	66	WP_020538785.1		Neg: SP(Sec/SPI) (Pr: 0.670), Pos: LIPO(Sec/SPII) (Pr: 0.607)	0 Y n4-14c19/20o	707	90					0	224	TANFOR	27	151	9.63e-08
322	252	Lewinella agarilytica DSM 24740	NZ_FOFB01000009.1	94788	101468	-	WP_090167786.1	286-373: cd00063 (FN3, Fibronectin type 3 domain; One of three types of internal repeats found in the plasma protein fibronectin.)	Neg: SP(Sec/SPI) (Pr: 0.879), Pos: SP(Sec/SPI) (Pr: 0.906)	0 Y n6-17c21/22o	2226	WP_090167789.1			0 Y n2-9c14/15o	580	40	WP_090167785.1		Neg: SP(Sec/SPI) (Pr: 0.810), Pos: SP(Sec/SPI) (Pr: 0.577)	0 Y n6-17c23/24o	710	16	WP_090167783.1	1461-1496: pfam13573 (SprB, SprB repeat.)	Neg: SP(Sec/SPI) (Pr: 0.992), Pos: SP(Sec/SPI) (Pr: 0.923)	0 Y n3-14c20/21o	5797	139	TANFOR	26	159	9.53e-09
323	17	Pseudomonas fluorescens AU6026	NZ_JRXU01000023.1	75468	75929	+	WP_034128507.1			0 0 o	153	WP_034128506.1	34-453: cd17316 (MFS_SV2_like, Metazoan Synaptic vesicle glycoprotein 2 (SV2) and related small molecule transporters of the Major Facilitator Superfamily.)		12 0 i24-43o78-99i106-123o129-153i165-187o193-215i282-305o317-336i348-364o370-387i408-428o434-454i	468	132					0	0					0	0	TANFOR	55	145	4.81e-08
324	18	Pseudomonas fluorescens AU6308	NZ_JRXZ01000019.1	76208	76669	+	WP_034128507.1			0 0 o	153	WP_034128506.1	34-453: cd17316 (MFS_SV2_like, Metazoan Synaptic vesicle glycoprotein 2 (SV2) and related small molecule transporters of the Major Facilitator Superfamily.)		12 0 i24-43o78-99i106-123o129-153i165-187o193-215i282-305o317-336i348-364o370-387i408-428o434-454i	468	132					0	0					0	0	TANFOR	55	145	4.81e-08
325	20	Pseudomonas fluorescens Ps_22	NZ_LCYA01000154.1	25294	25755	-	WP_034128507.1			0 0 o	153	WP_060765180.1	12-431: cd17316 (MFS_SV2_like, Metazoan Synaptic vesicle glycoprotein 2 (SV2) and related small molecule transporters of the Major Facilitator Superfamily.)		12 0 i7-24o56-77i84-101o107-131i143-165o171-193i260-283o295-314i326-342o348-365i386-406o412-432i	446	132					0	0					0	0	TANFOR	55	145	4.81e-08
326	27	Pseudomonas fluorescens 11293	NZ_PVUH01000017.1	41191	41652	+	WP_034128507.1			0 0 o	153	WP_034128506.1	34-453: cd17316 (MFS_SV2_like, Metazoan Synaptic vesicle glycoprotein 2 (SV2) and related small molecule transporters of the Major Facilitator Superfamily.)		12 0 i24-43o78-99i106-123o129-153i165-187o193-215i282-305o317-336i348-364o370-387i408-428o434-454i	468	132					0	0					0	0	TANFOR	55	145	4.81e-08
327	361	Pseudomonas lactis FSL E2-0548	NZ_RXHZ01000099.1	7920	8381	+	WP_034128507.1			0 0 o	153	WP_034128506.1	34-453: cd17316 (MFS_SV2_like, Metazoan Synaptic vesicle glycoprotein 2 (SV2) and related small molecule transporters of the Major Facilitator Superfamily.)		12 0 i24-43o78-99i106-123o129-153i165-187o193-215i282-305o317-336i348-364o370-387i408-428o434-454i	468	132					0	0					0	0	TANFOR	55	145	4.81e-08
328	541	Pseudomonas sp. B4-1 Pseudomonas carnis B4-1	NZ_CABIVL010000028.1	9126	9587	-	WP_034128507.1			0 0 o	153	WP_034128506.1	34-453: cd17316 (MFS_SV2_like, Metazoan Synaptic vesicle glycoprotein 2 (SV2) and related small molecule transporters of the Major Facilitator Superfamily.)		12 0 i24-43o78-99i106-123o129-153i165-187o193-215i282-305o317-336i348-364o370-387i408-428o434-454i	468	132					0	0					0	0	TANFOR	55	145	4.81e-08
329	485	Leptospira kemamanensis 201702454	NZ_RQGG01000037.1	14519	15583	-	WP_135620273.1	3-347: COG1509 (EpmB, L-lysine 2,3-aminomutase (EF-P beta-lysylation pathway) [Amino acid transport and metabolism].)		0 0 o	354					0	0	WP_135620272.1		Neg: LIPO(Sec/SPII) (Pr: 0.530), Pos: LIPO(Sec/SPII) (Pr: 0.502)	0 Y n8-18c23/24o	186	-17	WP_135620271.1			0 0 o	68	82	TANFOR	138	229	2.49e-09
330	418	Halomonas sp. 'Soap Lake #6'	NZ_CP020469.1	4188571	4189746	+	WP_078089681.1	5-376: PRK05660 (PRK05660, HemN family oxidoreductase; Provisional)		0 0 o	391	WP_078089680.1	6-198: PRK00120 (PRK00120, dITP/XTP pyrophosphatase; Reviewed)		0 Y n3-10c14/15o	203	-11	WP_078089682.1	80-219: COG2885 (OmpA, Outer membrane protein OmpA and related peptidoglycan-associated (lipo)proteins [Cell wall/membrane/envelope biogenesis].)	Neg: LIPO(Sec/SPII) (Pr: 0.998), Pos: LIPO(Sec/SPII) (Pr: 0.996)	2 Y n6-17c22/23o32-51i63-81o	224	38	WP_078089683.1	2-281: COG2961 (RlmJ, 23S rRNA A2030 N6-methylase RlmJ [Translation, ribosomal structure and biogenesis].)		0 0 o	281	96	TANFOR	2	86	5.44e-08
331	420	Halomonas sp. 'Soap Lake #7'	NZ_CP019915.1	4188571	4189746	+	WP_078089681.1	5-376: PRK05660 (PRK05660, HemN family oxidoreductase; Provisional)		0 0 o	391	WP_078089680.1	6-198: PRK00120 (PRK00120, dITP/XTP pyrophosphatase; Reviewed)		0 Y n3-10c14/15o	203	-11	WP_078089682.1	80-219: COG2885 (OmpA, Outer membrane protein OmpA and related peptidoglycan-associated (lipo)proteins [Cell wall/membrane/envelope biogenesis].)	Neg: LIPO(Sec/SPII) (Pr: 0.998), Pos: LIPO(Sec/SPII) (Pr: 0.996)	2 Y n6-17c22/23o32-51i63-81o	224	38	WP_078089683.1	2-281: COG2961 (RlmJ, 23S rRNA A2030 N6-methylase RlmJ [Translation, ribosomal structure and biogenesis].)		0 0 o	281	96	TANFOR	2	86	5.44e-08
332	217	Massilia plicata DSM 17505	NZ_CP038026.1	4156598	4157071	+	WP_134388227.1	29-135: cd00586 (4HBT, 4-hydroxybenzoyl-CoA thioesterase (4HBT).)		0 0 o	157					0	0	WP_134386426.1			3 0 i30-48o54-72i93-124o	125	184					0	0	TANFOR	14	95	6.71e-08
333	513	Martelella sp. GH2-6	NZ_VCLB01000007.1	67828	69561	+	WP_138748981.1			1 0 i231-252o	577	WP_138748980.1			0 0 o	190	-16					0	0					0	0	TANFOR	49	119	1.35e-09
334	515	Fulvivirga sp. M361	NZ_VKDC01000001.1	124139	128176	-	WP_143396331.1		Neg: SP(Sec/SPI) (Pr: 0.954), Pos: SP(Sec/SPI) (Pr: 0.963)	0 Y n4-14c23/24o	1345	WP_143396332.1		Neg: SP(Sec/SPI) (Pr: 0.734)	0 Y n6-17c21/22o	560	12	WP_143396330.1		Neg: SP(Sec/SPI) (Pr: 0.851), Pos: SP(Sec/SPI) (Pr: 0.674)	0 Y n4-15c19/20o	658	9	WP_143396513.1	82-117: pfam07484 (Collar, Phage Tail Collar Domain.)		0 0 o	262	250	TANFOR	31	138	8.78e-08
335	365	Lentimicrobium saccharophilum TBC1	NZ_DF968182.1	1457302	1462887	-	WP_137305457.1	24-159: TIGR02542 (T_forsyth_147, TANFOR domain.)	Neg: SP(Sec/SPI) (Pr: 0.618)	0 Y n2-9c13/14o	1861	WP_137305459.1		Neg: SP(Sec/SPI) (Pr: 0.929), Pos: SP(Sec/SPI) (Pr: 0.964)	0 Y n4-15c24/25o	563	49	WP_137305455.1		Neg: SP(Sec/SPI) (Pr: 0.989), Pos: SP(Sec/SPI) (Pr: 0.958)	0 Y n10-19c24/25o	520	44	WP_062039579.1	7-116: pfam02537 (CRCB, CrcB-like protein, Camphor Resistance (CrcB).)		3 Y n4-15c23/24o39-56i68-85o97-121i	127	215	TANFOR	24	159	2.72e-18
336	344	Flectobacillus sp. BAB-3569	NZ_NJFZ01000001.1	51471	58232	-	WP_095160111.1		Neg: SP(Sec/SPI) (Pr: 0.932), Pos: SP(Sec/SPI) (Pr: 0.722)	0 Y n5-15c19/20o	2253	WP_095160112.1			0 0 o	410	97	WP_095160110.1	204-560: COG3401 (FN3, Fibronectin type 3 domain [General function prediction only].)		0 0 o	565	344	WP_095160109.1	4-596: TIGR01394 (TypA_BipA, GTP-binding protein TypA/BipA.)		0 0 o	604	236	TANFOR	27	161	4.42e-09
337	346	Bosea vaviloviae Vaf18	NZ_CP017147.1	4302647	4303978	-	WP_069693813.1	1-417: cl21454 (NADB_Rossmann, Rossmann-fold NAD(P)(+)-binding proteins.)		0 0 o	443	WP_069691572.1	16-598: COG4264 (RhbC, Siderophore synthetase component [Inorganic ion transport and metabolism].)		0 0 o	611	5					0	0					0	0	TANFOR	154	279	5.76e-08
338	260	Aquimarina spongiae DSM 22623	NZ_FQYP01000003.1	8469	14897	+	WP_073315381.1	186-293: pfam16656 (Pur_ac_phosph_N, Purple acid Phosphatase, N-terminal domain.)	Neg: SP(Sec/SPI) (Pr: 0.997), Pos: SP(Sec/SPI) (Pr: 0.991)	0 Y n7-18c25/26o	2142	WP_073315380.1			0 0 o	536	13	WP_073315382.1	177-447: COG3401 (FN3, Fibronectin type 3 domain [General function prediction only].)	Neg: SP(Sec/SPI) (Pr: 0.971), Pos: SP(Sec/SPI) (Pr: 0.855)	0 Y n7-17c22/23o	682	11	WP_073315383.1	223-408: COG3275 (LytS, Sensor histidine kinase, LytS/YehU family [Signal transduction mechanisms].); 20-216: pfam07695 (7TMR-DISM_7TM, 7TM diverse intracellular signalling.)		7 0 o20-37i44-60o80-101i113-135o147-164i171-191o197-215i	444	27	TANFOR	29	149	3.97e-08
339	515	Fulvivirga sp. M361	NZ_VKDC01000005.1	209372	215215	+	WP_143397459.1	1104-1527: PTZ00121 (PTZ00121, MAEBL; Provisional); 41-164: TIGR02542 (T_forsyth_147, TANFOR domain.)	Neg: SP(Sec/SPI) (Pr: 0.945), Pos: SP(Sec/SPI) (Pr: 0.901)	0 Y n10-20c25/26o	1947	WP_143397458.1		Neg: SP(Sec/SPI) (Pr: 0.730), Pos: SP(Sec/SPI) (Pr: 0.561)	0 Y n4-14c18/19o	574	6	WP_143397460.1		Neg: LIPO(Sec/SPII) (Pr: 0.658), Pos: LIPO(Sec/SPII) (Pr: 0.808)	0 Y n6-16c20/21o	659	-1	WP_143397461.1	205-358: cl26890 (Collar, Phage Tail Collar Domain.)	Neg: SP(Sec/SPI) (Pr: 0.773), Pos: SP(Sec/SPI) (Pr: 0.484)	0 Y n4-14c18/19o	359	3	TANFOR	41	164	1.64e-11

## Sheet: Description
Column	Description
SN	Serial number
Genome ID	Genome ID
Genome Name	Genome name
Genomic Accession	Genomic accession
Start	Starting position
End	Ending position
Strand	Strand
Protein Accession	Protein accession
CD	Protein conserved domains
SignalP	Protein signal peptide
Phobius	Protein transmembrane domains
Length	Protein length
Operon Upstream Protein	Operon Upstream protein accession
CD	Operon Upstream protein conserved domains
SignalP	Operon Upstream protein signal peptide
Phobius	Operon Upstream protein transmembrane domains
Operon Upstream Length	Operon Upstream protein length
Operon Upstream Distance	Operon Upstream protein distance from protein
Operon Down1 Protein	Operon downstream 1 protein accession
CD	Operon downstream 1 protein conserved domains
SignalP	Operon downstream 1 protein signal peptide
Phobius	Operon downstream 1 protein transmembrane domains
Operon Down1 Length	Operon downstream 1 protein length
Operon Down1 Distance	Operon downstream 1 protein distance from protein
Operon Down2 Protein	Operon downstream 2 protein accession
CD	Operon downstream 2 protein conserved domains
SignalP	Operon downstream 2 protein signal peptide
Phobius	Operon downstream 2 protein transmembrane domains
Operon Down2 Length	Operon downstream 2 protein length
Operon Down2 Distance	Operon downstream 2 protein distance from protein
Domain	Domain name
Domain Start	Domain starting position
Domain End	Domain ending position
Evalue	Domain E-value
