# Supplementary material for: A novel class of polymorphic toxins in Bacteroidetes
Source: Life Sci Alliance. 2020 Mar 13;3(4):e201900631. doi: 10.26508/lsa.201900631 (PMC7073777; doi:10.26508/lsa.201900631)
Supplement: Supplementary file 4 [file LSA-2019-00631_Supplemental_Data_4.xlsx]

## Sheet: Conserved_Domains
PSSM-Id	CD Accession	CD Short Name	Description	A	B	C	D	P value
290306	pfam13573	SprB	SprB repeat.	173	8	166	670	2.13849e-87
225936	COG3401	FN3	Fibronectin type 3 domain [General function prediction only].	109	1	230	677	1.02869e-56
225828	COG3291	COG3291	PKD repeat [Function unknown].	109	9	230	669	8.1757e-47
275036	TIGR04183	Por_Secre_tail	Por secretion system C-terminal sorting domain.	145	78	194	600	1.63257e-28
188093	TIGR00864	PCC	polycystin cation channel protein.	37	2	302	676	2.03518e-16
238020	cd00063	FN3	Fibronectin type 3 domain; One of three types of internal repeats found in the plasma protein fibronectin.	34	14	305	664	5.8742e-08
238084	cd00146	PKD	polycystic kidney disease I (PKD) domain; similar to other cell-surface modules, with an IG-like fold; domain probably functions as a ligand binding site in protein-protein or protein-carbohydrate interactions; a single instance of the repeat is presented here.	16	1	323	677	2.16114e-07
226951	COG4585	COG4585	Signal transduction histidine kinase [Signal transduction mechanisms].	36	20	303	658	1.06619e-06
225107	COG2197	CitB	DNA-binding response regulator, NarL/FixJ family, contains REC and HTH domains [Signal transduction mechanisms, Transcription].	42	27	297	651	1.10563e-06
304934	cl23777	PRK01005	N/A.	11	0	328	678	5.05865e-06
314007	pfam10962	DUF2764	Protein of unknown function (DUF2764).	11	0	328	678	5.05865e-06
349881	cd03885	M20_CPDG2	M20 Peptidase Glutamate carboxypeptidase, a periplasmic enzyme.	11	0	328	678	5.05865e-06
235248	PRK04192	PRK04192	V-type ATP synthase subunit A; Provisional	10	0	329	678	1.54835e-05
225829	COG3292	COG3292	Periplasmic ligand-binding sensor domain [Signal transduction mechanisms].	31	19	308	659	1.9467e-05
316699	pfam14200	RicinB_lectin_2	Ricin-type beta-trefoil lectin domain-like.	14	3	325	675	4.02768e-05
227779	COG5492	YjdB	Uncharacterized conserved protein YjdB, contains Ig-like domain [General function prediction only].	11	1	328	677	4.2561e-05
259806	cd03408	SPFH_like_u1	Uncharacterized family; SPFH (stomatin, prohibitin, flotillin, and HflK/C) superfamily.	11	1	328	677	4.2561e-05
335048	pfam02687	FtsX	FtsX-like permease family.	11	1	328	677	4.2561e-05
179373	PRK02118	PRK02118	V-type ATP synthase subunit B; Provisional	9	0	330	678	4.7295e-05
334690	pfam01809	Haemolytic	Haemolytic domain.	9	0	330	678	4.7295e-05
337571	pfam09949	DUF2183	Uncharacterized conserved protein (DUF2183).	9	0	330	678	4.7295e-05
284830	pfam07495	Y_Y_Y	Y_Y_Y domain.	26	16	313	662	0.000100844
337112	pfam08570	DUF1761	Protein of unknown function (DUF1761).	10	1	329	677	0.000119732
339784	pfam16586	DUF5060	Domain of unknown function (DUF5060).	10	1	329	677	0.000119732
179382	PRK02195	PRK02195	V-type ATP synthase subunit D; Provisional	8	0	331	678	0.000144171
214495	smart00060	FN3	Fibronectin type 3 domain.	8	0	331	678	0.000144171
314541	pfam11695	DUF3291	Domain of unknown function (DUF3291).	9	1	330	677	0.000333598
234586	PRK00037	hisS	histidyl-tRNA synthetase; Reviewed	14	5	325	673	0.000336327
214657	smart00429	IPT	ig-like, plexins, transcription factors.	7	0	332	678	0.000438593
235600	PRK05771	PRK05771	V-type ATP synthase subunit I; Validated	7	0	332	678	0.000438593
226434	COG3920	COG3920	Two-component sensor histidine kinase, HisKA and HATPase domains [Signal transduction mechanisms].	10	2	329	676	0.000505585
271146	cd04080	CBM6_cellulase-like	Carbohydrate Binding Module 6 (CBM6); appended to glycoside hydrolase (GH) domains, including GH5 (cellulase).	11	3	328	675	0.000636388
224513	COG1597	LCB5	Diacylglycerol kinase family enzyme [Lipid transport and metabolism, General function prediction only].	9	2	330	676	0.001296
351129	cl00516	Restriction_endonuclease_like	N/A.	9	2	330	676	0.001296
107260	cd01575	PBP1_GntR	Ligand-binding domain of DNA transcription repressor GntR specific for gluconate, a member of the LacI-GalR family of bacterial transcription regulators.	6	0	333	678	0.00133158
139037	PRK12525	PRK12525	RNA polymerase sigma factor; Provisional	6	0	333	678	0.00133158
168170	PRK05677	PRK05677	long-chain-fatty-acid--CoA ligase; Validated	6	0	333	678	0.00133158
181268	PRK08175	PRK08175	aminotransferase; Validated	6	0	333	678	0.00133158
225762	COG3221	PhnD	ABC-type phosphate/phosphonate transport system, periplasmic component [Inorganic ion transport and metabolism].	6	0	333	678	0.00133158
226130	COG3602	COG3602	Uncharacterized protein [Function unknown].	6	0	333	678	0.00133158
226231	COG3708	YdeE	Predicted transcriptional regulator YdeE, contains AraC-type DNA-binding domain [Transcription].	6	0	333	678	0.00133158
235379	PRK05261	PRK05261	putative phosphoketolase; Provisional	6	0	333	678	0.00133158
239586	cd03509	DesA_FADS-like	Fatty acid desaturase protein family subgroup, a delta-12 acyl-lipid desaturase-like, DesA-like, yet uncharacterized subgroup of membrane fatty acid desaturase proteins found in alpha-, beta-, and gamma-proteobacteria.	6	0	333	678	0.00133158
283241	pfam05532	CsbD	CsbD-like.	6	0	333	678	0.00133158
317900	pfam15575	Imm49	Immunity protein 49.	6	0	333	678	0.00133158
340874	cd17316	MFS_SV2_like	Metazoan Synaptic vesicle glycoprotein 2 (SV2) and related small molecule transporters of the Major Facilitator Superfamily.	6	0	333	678	0.00133158
353966	cl15674	IPT	N/A.	6	0	333	678	0.00133158
315987	pfam13424	TPR_12	Tetratricopeptide repeat.	29	27	310	651	0.00258375
215061	PLN00113	PLN00113	leucine-rich repeat receptor-like protein kinase; Provisional	9	3	330	675	0.00366724
211749	TIGR02542	T_forsyth_147	TANFOR domain.	10	4	329	674	0.00381212
337373	pfam09346	SMI1_KNR4	SMI1 / KNR4 family (SUKH-1).	10	4	329	674	0.00381212
198289	cd03180	GST_C_2	C-terminal, alpha helical domain of an unknown subfamily 2 of Glutathione S-transferases.	5	0	334	678	0.00403462
224626	COG1712	COG1712	Predicted dinucleotide-utilizing enzyme [General function prediction only].	5	0	334	678	0.00403462
224639	COG1725	YhcF	DNA-binding transcriptional regulator YhcF, GntR family [Transcription].	5	0	334	678	0.00403462
226318	COG3795	COG3795	Uncharacterized conserved protein [Function unknown].	5	0	334	678	0.00403462
237227	PRK12846	PRK12846	peptide deformylase; Reviewed	5	0	334	678	0.00403462
239345	cd03047	GST_N_2	GST_N family, unknown subfamily 2; composed of uncharacterized bacterial proteins with similarity to GSTs.	5	0	334	678	0.00403462
240845	cd12399	RRM_HP0827_like	RNA recognition motif in Helicobacter pylori HP0827 protein and similar proteins.	5	0	334	678	0.00403462
321207	cl00848	Y1_Tnp	Transposase IS200 like.	5	0	334	678	0.00403462
334023	pfam00348	polyprenyl_synt	Polyprenyl synthetase.	5	0	334	678	0.00403462
334986	pfam02586	SRAP	SOS response associated peptidase (SRAP).	5	0	334	678	0.00403462
338155	pfam11888	DUF3408	Protein of unknown function (DUF3408).	5	0	334	678	0.00403462
197675	smart00354	HTH_LACI	helix_turn _helix lactose operon repressor.	6	1	333	677	0.00668952
236601	PRK09637	PRK09637	RNA polymerase sigma factor SigZ; Provisional	6	1	333	677	0.00668952
308194	pfam02447	GntP_permease	GntP family permease.	6	1	333	677	0.00668952
153235	cd03141	GATase1_Hsp31_like	Type 1 glutamine amidotransferase (GATase1)-like domain found in proteins similar to Escherichia coli Hsp31 protein.	7	2	332	676	0.00803082
226483	COG3975	COG3975	Predicted metalloprotease, contains C-terminal PDZ domain [General function prediction only].	7	2	332	676	0.00803082
198395	cd10448	GIY-YIG_unchar_3	GIY-YIG domain of uncharacterized hypothetical protein found in bacteria.	8	3	331	675	0.00850286
224450	COG1533	SplB	DNA repair photolyase [Replication, recombination and repair].	4	0	335	678	0.0122002
225328	COG2608	CopZ	Copper chaperone CopZ [Inorganic ion transport and metabolism].	4	0	335	678	0.0122002
234989	PRK01903	rnpA	ribonuclease P; Reviewed	4	0	335	678	0.0122002
291120	pfam14424	Toxin-deaminase	The BURPS668_1122 family of deaminases.	4	0	335	678	0.0122002
321132	cl00728	EVE	EVE domain.	4	0	335	678	0.0122002
338997	pfam13906	AA_permease_C	C-terminus of AA_permease.	4	0	335	678	0.0122002
349913	cd05663	M28_like_PA_PDZ_associated	M28 Zn-peptidase containing a protease-associated (PA) domain insert and associated with a PDZ domain.	4	0	335	678	0.0122002
225818	COG3279	LytT	DNA-binding response regulator, LytR/AlgR family [Transcription, Signal transduction mechanisms].	42	53	297	625	0.0133995
182225	PRK10077	xylE	D-xylose transporter XylE; Provisional	5	1	334	677	0.0175498
197757	smart00490	HELICc	helicase superfamily c-terminal domain.	5	1	334	677	0.0175498
227604	COG5279	CYK3	Cytokinesis protein 3, contains TGc (transglutaminase/protease-like) domain [Cell cycle control, cell division, chromosome partitioning].	5	1	334	677	0.0175498
236608	PRK09652	PRK09652	RNA polymerase sigma factor RpoE; Provisional	5	1	334	677	0.0175498
237192	PRK12758	PRK12758	DNA topoisomerase IV subunit A; Provisional	5	1	334	677	0.0175498
327499	cl19096	Flavin_utilizing_monoxygenases	N/A.	5	1	334	677	0.0175498
334609	pfam01610	DDE_Tnp_ISL3	Transposase.	5	1	334	677	0.0175498
336195	pfam05721	PhyH	Phytanoyl-CoA dioxygenase (PhyH).	5	1	334	677	0.0175498
354854	cl21528	Lipocalin	Lipocalin / cytosolic fatty-acid binding protein family.	5	1	334	677	0.0175498
338871	pfam13648	Lipocalin_4	Lipocalin-like domain.	8	4	331	674	0.0181741
307788	pfam01833	TIG	IPT/TIG domain.	7	3	332	675	0.0191592
107271	cd06276	PBP1_FucR_like	Ligand-binding domain of a transcription repressor, FucR, which functions as a molecular sensor of L-fucose availability.	6	2	333	676	0.0192595
225804	COG3265	GntK	Gluconate kinase [Carbohydrate transport and metabolism].	6	2	333	676	0.0192595
259798	cd03399	SPFH_flotillin	Flotillin or reggie family; SPFH (stomatin, prohibitin, flotillin, and HflK/C) superfamily.	6	2	333	676	0.0192595
315882	pfam13306	LRR_5	Leucine rich repeats (6 copies).	11	8	328	670	0.0229949
338785	pfam13508	Acetyltransf_7	Acetyltransferase (GNAT) domain.	15	14	324	664	0.0292313
223911	COG0841	AcrB	Multidrug efflux pump subunit AcrB [Defense mechanisms].	8	5	331	673	0.0337404
339701	pfam16344	DUF4974	Domain of unknown function (DUF4974).	14	13	325	665	0.0339997
153212	cd01741	GATase1_1	Subgroup of proteins having the Type 1 glutamine amidotransferase (GATase1) domain.	3	0	336	678	0.0368185
187564	cd05254	dTDP_HR_like_SDR_e	dTDP-6-deoxy-L-lyxo-4-hexulose reductase and related proteins, extended (e) SDRs.	3	0	336	678	0.0368185
211417	cd11576	GH99_GH71_like_2	Uncharacterized glycoside hydrolase family 99-like domain.	3	0	336	678	0.0368185
215219	PLN02389	PLN02389	biotin synthase	3	0	336	678	0.0368185
223288	COG0210	UvrD	Superfamily I DNA or RNA helicase [Replication, recombination and repair].	3	0	336	678	0.0368185
223680	COG0607	PspE	Rhodanese-related sulfurtransferase [Inorganic ion transport and metabolism].	3	0	336	678	0.0368185
224095	COG1174	OpuBB	ABC-type proline/glycine betaine transport system, permease component [Amino acid transport and metabolism].	3	0	336	678	0.0368185
224389	COG1472	BglX	Periplasmic beta-glucosidase and related glycosidases [Carbohydrate transport and metabolism].	3	0	336	678	0.0368185
227618	COG5301	COG5301	Phage-related tail fibre protein [Mobilome: prophages, transposons].	3	0	336	678	0.0368185
235392	PRK05291	trmE	tRNA modification GTPase TrmE; Reviewed	3	0	336	678	0.0368185
235787	PRK06370	PRK06370	mercuric reductase; Validated	3	0	336	678	0.0368185
236579	PRK09585	anmK	anhydro-N-acetylmuramic acid kinase; Reviewed	3	0	336	678	0.0368185
274311	TIGR02813	omega_3_PfaA	polyketide-type polyunsaturated fatty acid synthase PfaA.	3	0	336	678	0.0368185
294470	cl00721	DDE_Tnp_IS1	IS1 transposase.	3	0	336	678	0.0368185
307026	pfam00689	Cation_ATPase_C	Cation transporting ATPase, C-terminus.	3	0	336	678	0.0368185
312476	pfam08928	DUF1910	Domain of unknown function (DUF1910).	3	0	336	678	0.0368185
312477	pfam08929	DUF1911	Domain of unknown function (DUF1911).	3	0	336	678	0.0368185
317027	pfam14568	SUKH_6	SMI1-KNR4 cell-wall.	3	0	336	678	0.0368185
336163	pfam05635	23S_rRNA_IVP	23S rRNA-intervening sequence protein.	3	0	336	678	0.0368185
336326	pfam06170	DUF983	Protein of unknown function (DUF983).	3	0	336	678	0.0368185
337575	pfam09966	DUF2200	Uncharacterized protein conserved in bacteria (DUF2200).	3	0	336	678	0.0368185
338699	pfam13360	PQQ_2	PQQ-like domain.	3	0	336	678	0.0368185
350692	cd17934	DEXXQc_Upf1-like	DEXXQ-box helicase domain of Upf1-like helicase.	3	0	336	678	0.0368185
351307	cl00907	Glutaminase	Glutaminase.	3	0	336	678	0.0368185
351585	cl01747	SMI1_KNR4	SMI1 / KNR4 family (SUKH-1).	3	0	336	678	0.0368185
354853	cl21526	TolB_N	TolB amino-terminal domain.	3	0	336	678	0.0368185
355772	cl28888	TIM_phosphate_binding	N/A.	3	0	336	678	0.0368185
131573	TIGR02521	type_IV_pilW	type IV pilus biogenesis/stability protein PilW.	7	4	332	674	0.0378078
326346	cl14675	PorP_SprF	Type IX secretion system membrane protein PorP/SprF.	7	4	332	674	0.0378078
131350	TIGR02297	HpaA	4-hydroxyphenylacetate catabolism regulatory protein HpaA.	13	12	326	666	0.0395832
224684	COG1770	PtrB	Protease II [Amino acid transport and metabolism].	6	3	333	675	0.0417168
225177	COG2268	YqiK	Uncharacterized membrane protein YqiK, contains Band7/PHB/SPFH domain [Function unknown].	6	3	333	675	0.0417168
234567	PRK00005	fmt	methionyl-tRNA formyltransferase; Reviewed	5	2	334	676	0.0447004
234775	PRK00476	aspS	aspartyl-tRNA synthetase; Validated	5	2	334	676	0.0447004
259853	cd13831	HU	histone-like DNA-binding protein HU.	5	2	334	676	0.0447004
334368	pfam01063	Aminotran_4	Amino-transferase class IV.	5	2	334	676	0.0447004
335011	pfam02622	DUF179	Uncharacterized ACR, COG1678.	5	2	334	676	0.0447004
129987	TIGR00909	2A0306	amino acid transporter.	4	1	335	677	0.0448625
214628	smart00344	HTH_ASNC	helix_turn_helix ASNC type.	4	1	335	677	0.0448625
235406	PRK05321	PRK05321	nicotinate phosphoribosyltransferase; Provisional	4	1	335	677	0.0448625
235501	PRK05559	PRK05559	DNA topoisomerase IV subunit B; Reviewed	4	1	335	677	0.0448625
307488	pfam01345	DUF11	Domain of unknown function DUF11.	4	1	335	677	0.0448625
314627	pfam11790	Glyco_hydro_cc	Glycosyl hydrolase catalytic core.	4	1	335	677	0.0448625
316041	pfam13480	Acetyltransf_6	Acetyltransferase (GNAT) domain.	4	1	335	677	0.0448625
316059	pfam13500	AAA_26	AAA domain.	4	1	335	677	0.0448625
320796	cl00173	VIP2	N/A.	4	1	335	677	0.0448625
336516	pfam06824	Glyco_hydro_125	Metal-independent alpha-mannosidase (GH125).	4	1	335	677	0.0448625
340232	pfam17517	IgGFc_binding	IgGFc binding protein.	4	1	335	677	0.0448625
356566	cl29690	PSII_BNR	Photosynthesis system II assembly factor YCF48.	4	1	335	677	0.0448625
357560	cl30684	PRK06292	N/A.	4	1	335	677	0.0448625
235487	PRK05474	PRK05474	xylose isomerase; Provisional	7	5	332	673	0.0652951
354926	cl21747	SusD	starch binding outer membrane protein SusD.	25	33	314	645	0.0709978
357490	cl30614	FhuE	Outer membrane receptor for ferric coprogen and ferric-rhodotorulic acid [Inorganic ion transport and metabolism].	6	4	333	674	0.0755531
200072	TIGR01068	thioredoxin	thioredoxin.	5	3	334	675	0.087102
222984	PHA03100	PHA03100	ankyrin repeat protein; Provisional	4	2	335	676	0.099488
223393	COG0316	IscA	Fe-S cluster assembly iron-binding protein IscA [Posttranslational modification, protein turnover, chaperones].	4	2	335	676	0.099488
235554	PRK05673	dnaE	DNA polymerase III subunit alpha; Validated	4	2	335	676	0.099488
333868	pfam00135	COesterase	Carboxylesterase family.	4	2	335	676	0.099488
341039	cd17486	MFS_AmpG_like	AmpG and similar transporters of the Major Facilitator Superfamily.	4	2	335	676	0.099488
341056	cd08662	M13	Peptidase family M13 includes neprilysin and endothelin-converting enzyme I.	4	2	335	676	0.099488
341385	cd04613	CBS_pair_voltage-gated_CLC_bac	Two tandem repeats of the cystathionine beta-synthase (CBS pair) domains associated with the voltage gated CLC (chloride channel) in bacteria.	4	2	335	676	0.099488
349760	cd02042	ParAB_family	partition proteins ParAB family.	4	2	335	676	0.099488
224228	COG1309	AcrR	DNA-binding transcriptional regulator, AcrR family [Transcription].	13	15	326	663	0.100803
225375	COG2819	YbbA	Predicted hydrolase of the alpha/beta superfamily [General function prediction only].	7	6	332	672	0.102109
338792	pfam13517	VCBS	Repeat domain in Vibrio, Colwellia, Bradyrhizobium and Shewanella.	7	6	332	672	0.102109
355953	cl29077	GH_D	Glycoside hydrolases, clan D.	7	6	332	672	0.102109
338854	pfam13620	CarboxypepD_reg	Carboxypeptidase regulatory-like domain.	16	20	323	658	0.105357
223587	COG0513	SrmB	Superfamily II DNA and RNA helicase [Replication, recombination and repair].	9	9	330	669	0.105597
354300	cl17037	NBD_sugar-kinase_HSP70_actin	Nucleotide-Binding Domain of the sugar kinase/HSP70/actin superfamily.	9	9	330	669	0.105597
132554	TIGR03515	GldC	gliding motility-associated protein GldC.	3	1	336	677	0.110673
163702	cd08071	MPN_DUF2466	Mov34/MPN/PAD-1 family.	3	1	336	677	0.110673
193584	cd09895	NGN_SP_UpxY	N-Utilization Substance G (NusG) N-terminal domain in the NusG Specialized Paralog (SP), UpxY.	3	1	336	677	0.110673
223953	COG1022	FAA1	Long-chain acyl-CoA synthetase (AMP-forming) [Lipid transport and metabolism].	3	1	336	677	0.110673
226132	COG3604	FhlA	Transcriptional regulator containing GAF, AAA-type ATPase, and DNA-binding Fis domains [Transcription, Signal transduction mechanisms].	3	1	336	677	0.110673
226993	COG4646	COG4646	Adenine-specific DNA methylase, N12 class [Replication, recombination and repair].	3	1	336	677	0.110673
234650	PRK00122	rimM	16S rRNA-processing protein RimM; Provisional	3	1	336	677	0.110673
235506	PRK05565	fabG	3-ketoacyl-(acyl-carrier-protein) reductase; Provisional	3	1	336	677	0.110673
237744	PRK14521	rpsP	30S ribosomal protein S16; Provisional	3	1	336	677	0.110673
238245	cd00431	cysteine_hydrolases	Cysteine hydrolases; This family contains amidohydrolases, like CSHase (N-carbamoylsarcosine amidohydrolase), involved in creatine metabolism and nicotinamidase, converting nicotinamide to nicotinic acid and ammonia in the pyridine nucleotide cycle.	3	1	336	677	0.110673
238337	cd00603	IPT_PCSR	IPT domain of Plexins and Cell Surface Receptors (PCSR) and related proteins .	3	1	336	677	0.110673
238574	cd01169	HMPP_kinase	4-amino-5-hydroxymethyl-2-methyl-pyrimidine phosphate kinase (HMPP-kinase) catalyzes two consecutive phosphorylation steps in the thiamine phosphate biosynthesis pathway, leading to the synthesis of vitamin B1.	3	1	336	677	0.110673
239486	cd03392	PAP2_like_2	PAP2_like_2 proteins.	3	1	336	677	0.110673
274534	TIGR03351	PhnX-like	phosphonatase-like hydrolase.	3	1	336	677	0.110673
306914	pfam00529	HlyD	HlyD membrane-fusion protein of T1SS.	3	1	336	677	0.110673
311517	pfam07593	UnbV_ASPIC	ASPIC and UnbV.	3	1	336	677	0.110673
319783	cd02094	P-type_ATPase_Cu-like	P-type heavy metal-transporting ATPase, similar to human copper-transporting ATPases, ATP7A and ATP7B.	3	1	336	677	0.110673
334260	pfam00801	PKD	PKD domain.	3	1	336	677	0.110673
334401	pfam01139	RtcB	tRNA-splicing ligase RtcB.	3	1	336	677	0.110673
336016	pfam05117	DUF695	Family of unknown function (DUF695).	3	1	336	677	0.110673
338827	pfam13571	DUF4133	Domain of unknown function (DUF4133).	3	1	336	677	0.110673
350122	cd18610	GH130_BT3780-like	Glycosyl hydrolase family 130, such as beta-mammosidase BT3780 and BACOVA_03624.	3	1	336	677	0.110673
351241	cl00755	zf-dskA_traR	Prokaryotic dksA/traR C4-type zinc finger.	3	1	336	677	0.110673
132044	TIGR02999	Sig-70_X6	RNA polymerase sigma factor, TIGR02999 family.	2	0	337	678	0.110892
173791	cd04842	Peptidases_S8_Kp43_protease	Peptidase S8 family domain in Kp43 proteases.	2	0	337	678	0.110892
176193	cd08231	MDR_TM0436_like	Hypothetical enzyme TM0436 resembles the zinc-dependent alcohol dehydrogenases (ADH).	2	0	337	678	0.110892
179028	PRK00443	nagB	glucosamine-6-phosphate deaminase; Provisional	2	0	337	678	0.110892
182242	PRK10101	csgB	curlin minor subunit CsgB; Provisional	2	0	337	678	0.110892
182964	PRK11102	PRK11102	bicyclomycin/multidrug efflux system; Provisional	2	0	337	678	0.110892
183708	PRK12735	PRK12735	elongation factor Tu; Reviewed	2	0	337	678	0.110892
187538	cd05227	AR_SDR_e	aldehyde reductase, extended (e) SDRs.	2	0	337	678	0.110892
187652	cd08948	5beta-POR_like_SDR_a	progesterone 5-beta-reductase-like proteins (5beta-POR), atypical (a) SDRs.	2	0	337	678	0.110892
197640	smart00304	HAMP	HAMP (Histidine kinases, Adenylyl cyclases, Methyl binding proteins, Phosphatases) domain.	2	0	337	678	0.110892
223435	COG0358	DnaG	DNA primase (bacterial type) [Replication, recombination and repair].	2	0	337	678	0.110892
223508	COG0431	SsuE	NAD(P)H-dependent FMN reductase [Energy production and conversion].	2	0	337	678	0.110892
224872	COG1961	PinE	Site-specific DNA recombinase related to the DNA invertase Pin [Replication, recombination and repair].	2	0	337	678	0.110892
225222	COG2345	COG2345	Predicted transcriptional regulator, ArsR family [Transcription].	2	0	337	678	0.110892
225359	COG2770	HAMP	HAMP domain [Signal transduction mechanisms].	2	0	337	678	0.110892
225457	COG2905	COG2905	Signal-transduction protein containing cAMP-binding, CBS, and nucleotidyltransferase domains [Signal transduction mechanisms].	2	0	337	678	0.110892
225509	COG2961	RlmJ	23S rRNA A2030 N6-methylase RlmJ [Translation, ribosomal structure and biogenesis].	2	0	337	678	0.110892
226121	COG3593	YbjD	Predicted ATP-dependent endonuclease of the OLD family, contains P-loop ATPase and TOPRIM domains [Replication, recombination and repair].	2	0	337	678	0.110892
227335	COG5002	VicK	Signal transduction histidine kinase [Signal transduction mechanisms].	2	0	337	678	0.110892
234648	PRK00120	PRK00120	dITP/XTP pyrophosphatase; Reviewed	2	0	337	678	0.110892
235135	PRK03592	PRK03592	haloalkane dehalogenase; Provisional	2	0	337	678	0.110892
235541	PRK05643	PRK05643	DNA polymerase III subunit beta; Validated	2	0	337	678	0.110892
236886	PRK11249	katE	hydroperoxidase II; Provisional	2	0	337	678	0.110892
237860	PRK14939	gyrB	DNA gyrase subunit B; Provisional	2	0	337	678	0.110892
238434	cd00854	NagA	N-acetylglucosamine-6-phosphate deacetylase, NagA, catalyzes the hydrolysis of the N-acetyl group of N-acetyl-glucosamine-6-phosphate (GlcNAc-6-P) to glucosamine 6-phosphate and acetate.	2	0	337	678	0.110892
239905	cd04458	CSP_CDS	Cold-Shock Protein (CSP) contains an S1-like cold-shock domain (CSD) that is found in eukaryotes, prokaryotes, and archaea.	2	0	337	678	0.110892
240623	cd05199	SDH_like	Saccharopine Dehydrogenase like proteins.	2	0	337	678	0.110892
273037	TIGR00362	DnaA	chromosomal replication initiator protein DnaA.	2	0	337	678	0.110892
275269	TIGR04476	exosort_XrtN	exosortase N.	2	0	337	678	0.110892
292237	pfam15603	Imm74	Immunity protein 74.	2	0	337	678	0.110892
309442	pfam04307	YdjM	LexA-binding, inner membrane-associated putative hydrolase.	2	0	337	678	0.110892
309994	pfam05103	DivIVA	DivIVA protein.	2	0	337	678	0.110892
310433	pfam05834	Lycopene_cycl	Lycopene cyclase protein.	2	0	337	678	0.110892
310974	pfam06736	DUF1211	Protein of unknown function (DUF1211).	2	0	337	678	0.110892
311955	pfam08282	Hydrolase_3	haloacid dehalogenase-like hydrolase.	2	0	337	678	0.110892
312151	pfam08547	CIA30	Complex I intermediate-associated protein 30 (CIA30).	2	0	337	678	0.110892
313370	pfam10127	Nuc-transf	Predicted nucleotidyltransferase.	2	0	337	678	0.110892
315932	pfam13367	PrsW-protease	Protease prsW family.	2	0	337	678	0.110892
316705	pfam14206	Cys_rich_CPCC	Cysteine-rich CPCC.	2	0	337	678	0.110892
316900	pfam14414	WHH	A nuclease of the HNH/ENDO VII superfamily with conserved WHH.	2	0	337	678	0.110892
318379	pfam16132	DUF4843	Domain of unknown function (DUF4843).	2	0	337	678	0.110892
328764	cl21511	PEMT	Phospholipid methyltransferase.	2	0	337	678	0.110892
333719	NF000535	MSCRAMM_SdrC	MSCRAMM family adhesin SdrC.	2	0	337	678	0.110892
335204	pfam03073	TspO_MBR	TspO/MBR family.	2	0	337	678	0.110892
335982	pfam05016	ParE_toxin	ParE toxin of type II toxin-antitoxin system, parDE.	2	0	337	678	0.110892
336654	pfam07275	ArdA	Antirestriction protein (ArdA).	2	0	337	678	0.110892
337806	pfam10614	CsgF	Type VIII secretion system (T8SS), CsgF protein.	2	0	337	678	0.110892
337812	pfam10627	CsgE	Curli assembly protein CsgE.	2	0	337	678	0.110892
338077	pfam11721	Malectin	Di-glucose binding within endoplasmic reticulum.	2	0	337	678	0.110892
338477	pfam12760	Zn_Tnp_IS1595	Transposase zinc-ribbon domain.	2	0	337	678	0.110892
338478	pfam12762	DDE_Tnp_IS1595	ISXO2-like transposase domain.	2	0	337	678	0.110892
338670	pfam13292	DXP_synthase_N	1-deoxy-D-xylulose-5-phosphate synthase.	2	0	337	678	0.110892
338688	pfam13340	DUF4096	Putative transposase of IS4/5 family (DUF4096).	2	0	337	678	0.110892
338705	pfam13370	Fer4_13	4Fe-4S single cluster domain of Ferredoxin I.	2	0	337	678	0.110892
338959	pfam13817	DDE_Tnp_IS66_C	IS66 C-terminal element.	2	0	337	678	0.110892
339053	pfam14021	TNT	Tuberculosis necrotizing toxin.	2	0	337	678	0.110892
340870	cd17312	MFS_OPA_SLC37	Organophosphate:Pi antiporter/Solute Carrier family 37 of the Major Facilitator Superfamily of transporters.	2	0	337	678	0.110892
350125	cd18613	GH130	Glycosyl hydrolase family 130; uncharacterized.	2	0	337	678	0.110892
350159	cd09008	MTAN	5'-methylthioadenosine/S-adenosylhomocysteine nucleosidases.	2	0	337	678	0.110892
350195	cd18808	SF1_C_Upf1	C-terminal helicase domain of Upf1-like family helicases.	2	0	337	678	0.110892
350953	cl00210	Isoprenoid_Biosyn_C1	Isoprenoid Biosynthesis enzymes, Class 1.	2	0	337	678	0.110892
351011	cl00303	PNP_UDP_1	Phosphorylase superfamily.	2	0	337	678	0.110892
351095	cl00445	Iso_dh	Isocitrate/isopropylmalate dehydrogenase.	2	0	337	678	0.110892
351222	cl00711	Glyco_hydro_77	4-alpha-glucanotransferase.	2	0	337	678	0.110892
354873	cl21562	DDE_Tnp_4	DDE superfamily endonuclease.	2	0	337	678	0.110892
355708	cl28191	sorted_by_XrtN	XrtN system VIT domain protein.	2	0	337	678	0.110892
356547	cl29671	PKD_2	PKD-like family.	2	0	337	678	0.110892
176648	cd06127	DEDDh	DEDDh 3'-5' exonuclease domain family.	6	5	333	673	0.120847
280533	pfam02384	N6_Mtase	N-6 DNA Methylase.	6	5	333	673	0.120847
335407	pfam03631	Virul_fac_BrkB	Virulence factor BrkB.	6	5	333	673	0.120847
338511	pfam12833	HTH_18	Helix-turn-helix domain.	19	26	320	652	0.129523
223149	COG0071	IbpA	Molecular chaperone IbpA, HSP20 family [Posttranslational modification, protein turnover, chaperones].	5	4	334	674	0.143834
334949	pfam02502	LacAB_rpiB	Ribose/Galactose Isomerase.	5	4	334	674	0.143834
354820	cl21464	cupin_like	Conserved domain found in cupin and related proteins.	5	4	334	674	0.143834
223562	COG0488	Uup	ATPase components of ABC transporters with duplicated ATPase domains [General function prediction only].	7	7	332	671	0.147869
354813	cl21456	Periplasmic_Binding_Protein_Type_2	Type 2 periplasmic binding fold superfamily.	10	12	329	666	0.160624
239803	cd04276	ZnMc_MMP_like_2	Zinc-dependent metalloprotease; MMP_like sub-family 2.	4	3	335	675	0.172538
273109	TIGR00508	bioA	adenosylmethionine-8-amino-7-oxononanoate transaminase.	4	3	335	675	0.172538
319166	pfam17148	DUF5117	Domain of unknown function (DUF5117).	4	3	335	675	0.172538
319180	pfam17162	DUF5118	Domain of unknown function (DUF5118).	4	3	335	675	0.172538
328814	cl21589	Relaxase	Relaxase/Mobilisation nuclease domain.	4	3	335	675	0.172538
335768	pfam04397	LytTR	LytTr DNA-binding domain.	4	3	335	675	0.172538
339688	pfam16313	DUF4953	Met-zincin.	4	3	335	675	0.172538
335557	pfam03965	Penicillinase_R	Penicillinase repressor.	6	6	333	672	0.1764
179076	PRK00596	rpsJ	30S ribosomal protein S10; Reviewed	3	2	336	676	0.209389
206637	cd11304	Cadherin_repeat	Cadherin tandem repeat domain.	3	2	336	676	0.209389
223533	COG0457	TPR	Tetratricopeptide (TPR) repeat [General function prediction only].	3	2	336	676	0.209389
224117	COG1196	Smc	Chromosome segregation ATPase [Cell cycle control, cell division, chromosome partitioning].	3	2	336	676	0.209389
225519	COG2972	YesM	Sensor histidine kinase YesM [Signal transduction mechanisms].	3	2	336	676	0.209389
235355	PRK05163	rpsL	30S ribosomal protein S12; Validated	3	2	336	676	0.209389
235398	PRK05302	PRK05302	30S ribosomal protein S7; Validated	3	2	336	676	0.209389
238429	cd00833	PKS	polyketide synthases (PKSs) polymerize simple fatty acids into a large variety of different products, called polyketides, by successive decarboxylating Claisen condensations.	3	2	336	676	0.209389
239807	cd04280	ZnMc_astacin_like	Zinc-dependent metalloprotease, astacin_like subfamily or peptidase family M12A, a group of zinc-dependent proteolytic enzymes with a HExxH zinc-binding site/active site.	3	2	336	676	0.209389
319228	pfam17210	SdrD_B	SdrD B-like domain.	3	2	336	676	0.209389
337168	pfam08719	DUF1768	Domain of unknown function (DUF1768).	3	2	336	676	0.209389
338828	pfam13572	DUF4134	Domain of unknown function (DUF4134).	3	2	336	676	0.209389
350992	cl00264	Ferritin_like	Ferritin-like superfamily of diiron-containing four-helix-bundle proteins.	3	2	336	676	0.209389
354328	cl17346	Trehalase	Trehalase.	3	2	336	676	0.209389
355022	cl23725	Glyco_hydro_1	Glycosyl hydrolase family 1.	3	2	336	676	0.209389
355589	cl26890	Collar	Phage Tail Collar Domain.	3	2	336	676	0.209389
356104	cl29228	PrmA	Ribosomal protein L11 methyltransferase (PrmA).	3	2	336	676	0.209389
338600	pfam13102	Phage_int_SAM_5	Phage integrase SAM-like domain.	8	10	331	668	0.221418
338453	pfam12704	MacB_PCD	MacB-like periplasmic core domain.	12	17	327	661	0.229105
340009	pfam17293	Arm-DNA-bind_5	Arm DNA-binding domain.	6	7	333	671	0.240078
350955	cl00213	DNA_BRE_C	DNA breaking-rejoining enzymes, C-terminal catalytic domain.	6	7	333	671	0.240078
237874	PRK14971	PRK14971	DNA polymerase III subunits gamma and tau; Provisional	4	4	335	674	0.257974
238233	cd00400	Voltage_gated_ClC	CLC voltage-gated chloride channel.	4	4	335	674	0.257974
313813	pfam10677	DUF2490	Protein of unknown function (DUF2490).	4	4	335	674	0.257974
99743	cd06450	DOPA_deC_like	DOPA decarboxylase family.	2	1	337	677	0.25904
173412	PTZ00121	PTZ00121	MAEBL; Provisional	2	1	337	677	0.25904
182059	PRK09752	PRK09752	adhesin; Provisional	2	1	337	677	0.25904
183087	PRK11325	PRK11325	scaffold protein; Provisional	2	1	337	677	0.25904
184450	PRK14012	PRK14012	cysteine desulfurase; Provisional	2	1	337	677	0.25904
213197	cd03230	ABC_DR_subfamily_A	ATP-binding cassette domain of the drug resistance transporter and related proteins, subfamily A.	2	1	337	677	0.25904
223377	COG0300	DltE	Short-chain dehydrogenase [General function prediction only].	2	1	337	677	0.25904
223510	COG0433	YjgR	Archaeal DNA helicase HerA or a related bacterial ATPase, contains HAS-barrel and ATPase domains [Replication, recombination and repair].	2	1	337	677	0.25904
223635	COG0561	Cof	Hydroxymethylpyrimidine pyrophosphatase and other HAD family phosphatases [Coenzyme transport and metabolism, General function prediction only].	2	1	337	677	0.25904
224014	COG1089	Gmd	GDP-D-mannose dehydratase [Cell wall/membrane/envelope biogenesis].	2	1	337	677	0.25904
224418	COG1501	YicI	Alpha-glucosidase, glycosyl hydrolase family GH31 [Carbohydrate transport and metabolism].	2	1	337	677	0.25904
225718	COG3177	COG3177	Fic family protein [Transcription].	2	1	337	677	0.25904
226195	COG3669	AfuC	Alpha-L-fucosidase [Carbohydrate transport and metabolism].	2	1	337	677	0.25904
226591	COG4106	Tam	Trans-aconitate methyltransferase [Energy production and conversion].	2	1	337	677	0.25904
226715	COG4264	RhbC	Siderophore synthetase component [Inorganic ion transport and metabolism].	2	1	337	677	0.25904
227204	COG4867	COG4867	Uncharacterized protein, contains von Willebrand factor type A (vWA) domain [Function unknown].	2	1	337	677	0.25904
234942	PRK01318	PRK01318	membrane protein insertase; Provisional	2	1	337	677	0.25904
236499	PRK09404	sucA	2-oxoglutarate dehydrogenase E1 component; Reviewed	2	1	337	677	0.25904
236646	PRK10064	PRK10064	catecholate siderophore receptor CirA; Provisional	2	1	337	677	0.25904
238254	cd00449	PLPDE_IV	PyridoxaL 5'-Phosphate Dependent Enzymes class IV (PLPDE_IV).	2	1	337	677	0.25904
238518	cd01085	APP	X-Prolyl Aminopeptidase 2.	2	1	337	677	0.25904
240122	cd04818	PA_subtilisin_1	PA_subtilisin_1: Protease-associated domain containing subtilisin-like proteases, subgroup 1.	2	1	337	677	0.25904
273528	TIGR01263	4HPPD	4-hydroxyphenylpyruvate dioxygenase.	2	1	337	677	0.25904
273675	TIGR01534	GAPDH-I	glyceraldehyde-3-phosphate dehydrogenase, type I.	2	1	337	677	0.25904
274581	TIGR03440	egtB_TIGR03440	ergothioneine biosynthesis protein EgtB.	2	1	337	677	0.25904
274836	TIGR03891	thiopep_ocin	thiopeptide-type bacteriocin biosynthesis domain.	2	1	337	677	0.25904
288936	pfam12120	Arr-ms	Rifampin ADP-ribosyl transferase.	2	1	337	677	0.25904
308488	pfam02872	5_nucleotid_C	5'-nucleotidase, C-terminal domain.	2	1	337	677	0.25904
309743	pfam04738	Lant_dehydr_N	Lantibiotic dehydratase, C-terminus.	2	1	337	677	0.25904
310648	pfam06197	DUF998	Protein of unknown function (DUF998).	2	1	337	677	0.25904
315332	pfam12636	DUF3781	Protein of unknown function (DUF3781).	2	1	337	677	0.25904
316603	pfam14091	DUF4269	Domain of unknown function (DUF4269).	2	1	337	677	0.25904
316818	pfam14329	DUF4386	Domain of unknown function (DUF4386).	2	1	337	677	0.25904
316970	pfam14498	Glyco_hyd_65N_2	Glycosyl hydrolase family 65, N-terminal domain.	2	1	337	677	0.25904
321361	cl01132	FA_hydroxylase	Fatty acid hydroxylase superfamily.	2	1	337	677	0.25904
321418	cl01255	DAGK_cat	Diacylglycerol kinase catalytic domain.	2	1	337	677	0.25904
321494	cl01417	Nuc-transf	Predicted nucleotidyltransferase.	2	1	337	677	0.25904
328785	cl21542	EthD	EthD domain.	2	1	337	677	0.25904
333790	pfam00041	fn3	Fibronectin type III domain.	2	1	337	677	0.25904
333815	pfam00072	Response_reg	Response regulator receiver domain.	2	1	337	677	0.25904
334224	pfam00719	Pyrophosphatase	Inorganic pyrophosphatase.	2	1	337	677	0.25904
334489	pfam01321	Creatinase_N	Creatinase/Prolidase N-terminal domain.	2	1	337	677	0.25904
334819	pfam02128	Peptidase_M36	Fungalysin metallopeptidase (M36).	2	1	337	677	0.25904
336004	pfam05076	SUFU	Suppressor of fused protein (SUFU).	2	1	337	677	0.25904
336668	pfam07311	Dodecin	Dodecin.	2	1	337	677	0.25904
337212	pfam08808	RES	RES domain.	2	1	337	677	0.25904
337534	pfam09851	SHOCT	Short C-terminal domain.	2	1	337	677	0.25904
338456	pfam12708	Pectate_lyase_3	Pectate lyase superfamily protein.	2	1	337	677	0.25904
338529	pfam12869	tRNA_anti-like	tRNA_anti-like.	2	1	337	677	0.25904
338609	pfam13155	Toprim_2	Toprim-like.	2	1	337	677	0.25904
338663	pfam13280	WYL	WYL domain.	2	1	337	677	0.25904
338673	pfam13305	WHG	WHG domain.	2	1	337	677	0.25904
338795	pfam13523	Acetyltransf_8	Acetyltransferase (GNAT) domain.	2	1	337	677	0.25904
339219	pfam14412	AHH	A nuclease family of the HNH/ENDO VII superfamily with conserved AHH.	2	1	337	677	0.25904
339419	pfam14902	DUF4494	Domain of unknown function (DUF4494).	2	1	337	677	0.25904
339649	pfam16188	Peptidase_M24_C	C-terminal region of peptidase_M24.	2	1	337	677	0.25904
339650	pfam16189	Creatinase_N_2	Creatinase/Prolidase N-terminal domain.	2	1	337	677	0.25904
340917	cd17359	MFS_XylE_like	D-xylose-proton symporter and similar transporters of the Major Facilitator Superfamily.	2	1	337	677	0.25904
350801	cd18043	DEXXQc_SF1	DEXXQ-box helicase domain of Superfamily 1 helicases.	2	1	337	677	0.25904
350897	cl00089	NUC	N/A.	2	1	337	677	0.25904
351036	cl00335	NDPk	N/A.	2	1	337	677	0.25904
351198	cl00653	Endonuclease_V	Endonuclease_V, a DNA repair enzyme that initiates repair of nitrosative deaminated purine bases.	2	1	337	677	0.25904
354327	cl17279	DHFR	N/A.	2	1	337	677	0.25904
354339	cl17718	DUF2384	Protein of unknown function (DUF2384).	2	1	337	677	0.25904
354372	cl18957	TerD_like	Uncharacterized proteins involved in stress response, similar to tellurium resistance terD.	2	1	337	677	0.25904
354957	cl22837	Peptidase_Mx1	Putative zinc-binding metallo-peptidase.	2	1	337	677	0.25904
355045	cl23781	Fascin	N/A.	2	1	337	677	0.25904
132844	cd07205	Pat_PNPLA6_PNPLA7_NTE1_like	Patatin-like phospholipase domain containing protein 6, protein 7, and fungal NTE1.	5	6	334	672	0.28817
352291	cl04955	LanC_like	Cyclases involved in the biosynthesis of lantibiotics, and similar proteins.	5	6	334	672	0.28817
273804	TIGR01782	TonB-Xanth-Caul	TonB-dependent receptor.	6	8	333	670	0.309234
187632	cd05374	17beta-HSD-like_SDR_c	17beta hydroxysteroid dehydrogenase-like, classical (c) SDRs.	3	3	336	675	0.319291
236869	PRK11168	glpC	sn-glycerol-3-phosphate dehydrogenase subunit C; Provisional	3	3	336	675	0.319291
238859	cd01821	Rhamnogalacturan_acetylesterase_like	Rhamnogalacturan_acetylesterase_like subgroup of SGNH-hydrolases.	3	3	336	675	0.319291
271335	cd04513	Glycosylasparaginase	Glycosylasparaginase and similar proteins.	3	3	336	675	0.319291
319934	cd08346	PcpA_N_like	N-terminal domain of Sphingobium chlorophenolicum 2,6-dichloro-p-hydroquinone 1,2-dioxygenase (PcpA), and similar proteins.	3	3	336	675	0.319291
319935	cd08347	PcpA_C_like	C-terminal domain of Sphingobium chlorophenolicum 2,6-dichloro-p-hydroquinone 1,2-dioxygenase (PcpA), and similar proteins.	3	3	336	675	0.319291
336769	pfam07696	7TMR-DISMED2	7TMR-DISM extracellular 2.	3	3	336	675	0.319291
338191	pfam11954	DUF3471	Domain of unknown function (DUF3471).	3	3	336	675	0.319291
338493	pfam12796	Ank_2	Ankyrin repeats (3 copies).	3	3	336	675	0.319291
338801	pfam13534	Fer4_17	4Fe-4S dicluster domain.	3	3	336	675	0.319291
349929	cd05680	M20_dipept_like	uncharacterized M20 dipeptidase.	3	3	336	675	0.319291
352902	cl08459	PA14	PA14 domain.	3	3	336	675	0.319291
354882	cl21590	PMT_2	Dolichyl-phosphate-mannose-protein mannosyltransferase.	3	3	336	675	0.319291
351001	cl00281	metallo-dependent_hydrolases	N/A.	12	19	327	659	0.320333
99747	cd06454	KBL_like	KBL_like; this family belongs to the pyridoxal phosphate (PLP)-dependent aspartate aminotransferase superfamily (fold I).	1	0	338	678	0.333333
100040	cd03349	LbH_XAT	Xenobiotic acyltransferase (XAT): The XAT class of hexapeptide acyltransferases is composed of a large number of microbial enzymes that catalyze the CoA-dependent acetylation of a variety of hydroxyl-bearing acceptors such as chloramphenicol and streptogramin, among others.	1	0	338	678	0.333333
130366	TIGR01299	synapt_SV2	synaptic vesicle protein SV2.	1	0	338	678	0.333333
131215	TIGR02160	PA_CoA_Oxy5	phenylacetate-CoA oxygenase/reductase, PaaK subunit.	1	0	338	678	0.333333
133024	cd04181	NTP_transferase	NTP_transferases catalyze the transfer of nucleotides onto phosphosugars.	1	0	338	678	0.333333
133035	cd04192	GT_2_like_e	Subfamily of Glycosyltransferase Family GT2 of unknown function.	1	0	338	678	0.333333
133458	cd06849	lipoyl_domain	Lipoyl domain of the dihydrolipoyl acyltransferase component (E2) of 2-oxo acid dehydrogenases.	1	0	338	678	0.333333
153123	cd02432	Nodulin-21_like_1	Nodulin-21 and CCC1-related protein family.	1	0	338	678	0.333333
173793	cd04847	Peptidases_S8_Subtilisin_like_2	Peptidase S8 family domain in Subtilisin-like proteins.	1	0	338	678	0.333333
173926	cd04301	NAT_SF	N-Acyltransferase superfamily: Various enzymes that characteristically catalyze the transfer of an acyl group to a substrate.	1	0	338	678	0.333333
176138	cd08447	PBP2_LTTR_aromatics_like_1	The C-terminal substrate binding domain of an uncharacterized LysR-type transcriptional regulator similar to regulators involved in the catabolism of aromatic compounds, contains type 2 periplasmic binding fold.	1	0	338	678	0.333333
176228	cd08267	MDR1	Medium chain dehydrogenases/reductase (MDR)/zinc-dependent alcohol dehydrogenase-like family.	1	0	338	678	0.333333
176240	cd08279	Zn_ADH_class_III	Class III alcohol dehydrogenase.	1	0	338	678	0.333333
176243	cd08283	FDH_like_1	Glutathione-dependent formaldehyde dehydrogenase related proteins, child 1.	1	0	338	678	0.333333
176903	cd08894	SRPBCC_CalC_Aha1-like_1	Putative hydrophobic ligand-binding SRPBCC domain of an uncharacterized subgroup of CalC- and Aha1-like proteins.	1	0	338	678	0.333333
176974	CHL00033	ycf3	photosystem I assembly protein Ycf3	1	0	338	678	0.333333
178815	PRK00041	PRK00041	hypothetical protein; Validated	1	0	338	678	0.333333
178882	PRK00124	PRK00124	hypothetical protein; Validated	1	0	338	678	0.333333
179385	PRK02224	PRK02224	chromosome segregation protein; Provisional	1	0	338	678	0.333333
180413	PRK06128	PRK06128	oxidoreductase; Provisional	1	0	338	678	0.333333
180967	PRK07411	PRK07411	hypothetical protein; Validated	1	0	338	678	0.333333
181344	PRK08273	PRK08273	thiamine pyrophosphate protein; Provisional	1	0	338	678	0.333333
182106	PRK09841	PRK09841	cryptic autophosphorylating protein tyrosine kinase Etk; Provisional	1	0	338	678	0.333333
182324	PRK10238	PRK10238	aromatic amino acid transporter; Provisional	1	0	338	678	0.333333
182581	PRK10600	PRK10600	nitrate/nitrite sensor protein NarX; Provisional	1	0	338	678	0.333333
182912	PRK11028	PRK11028	6-phosphogluconolactonase; Provisional	1	0	338	678	0.333333
184563	PRK14195	PRK14195	camphor resistance protein CrcB; Provisional	1	0	338	678	0.333333
186578	cl03578	MerT	MerT mercuric transport protein.	1	0	338	678	0.333333
187766	cd09634	Cas1_I-II-III	CRISPR/Cas system-associated protein Cas1.	1	0	338	678	0.333333
188121	TIGR01250	pro_imino_pep_2	proline-specific peptidase, Bacillus coagulans-type subfamily.	1	0	338	678	0.333333
193608	cd09641	Cas3''_I	CRISPR/Cas system-associated protein Cas3''.	1	0	338	678	0.333333
197478	smart00028	TPR	Tetratricopeptide repeats.	1	0	338	678	0.333333
200455	cd11316	AmyAc_bac2_AmyA	Alpha amylase catalytic domain found in bacterial Alpha-amylases (also called 1,4-alpha-D-glucan-4-glucanohydrolase).	1	0	338	678	0.333333
213356	cd12822	TmCorA-like	Thermotoga maritima CorA-like family.	1	0	338	678	0.333333
214643	smart00387	HATPase_c	Histidine kinase-like ATPases.	1	0	338	678	0.333333
214672	smart00458	RICIN	Ricin-type beta-trefoil.	1	0	338	678	0.333333
214692	smart00487	DEXDc	DEAD-like helicases superfamily.	1	0	338	678	0.333333
223580	COG0506	PutA	Proline dehydrogenase [Amino acid transport and metabolism].	1	0	338	678	0.333333
223592	COG0518	GuaA1	GMP synthase - Glutamine amidotransferase domain [Nucleotide transport and metabolism].	1	0	338	678	0.333333
223804	COG0732	HsdS	Restriction endonuclease S subunit [Defense mechanisms].	1	0	338	678	0.333333
223910	COG0840	Tar	Methyl-accepting chemotaxis protein [Cell motility, Signal transduction mechanisms].	1	0	338	678	0.333333
224113	COG1192	BcsQ	Cellulose biosynthesis protein BcsQ [Cell motility].	1	0	338	678	0.333333
224124	COG1203	Cas3	CRISPR/Cas system-associated endonuclease/helicase Cas3 [Defense mechanisms].	1	0	338	678	0.333333
224125	COG1204	BRR2	Replicative superfamily II helicase [Replication, recombination and repair].	1	0	338	678	0.333333
224241	COG1322	RmuC	DNA anti-recombination protein (rearrangement mutator) RmuC [Replication, recombination and repair].	1	0	338	678	0.333333
224261	COG1342	COG1342	Predicted DNA-binding protein, UPF0251 family [General function prediction only].	1	0	338	678	0.333333
224332	COG1414	IclR	DNA-binding transcriptional regulator, IclR family [Transcription].	1	0	338	678	0.333333
224514	COG1598	HicB	Predicted nuclease of the RNAse H fold, HicB family [Defense mechanisms].	1	0	338	678	0.333333
224653	COG1739	YIH1	Putative translation regulator, IMPACT (imprinted ancient) protein family [General function prediction only].	1	0	338	678	0.333333
224981	COG2070	YrpB	NAD(P)H-dependent flavin oxidoreductase YrpB, nitropropane dioxygenase family [General function prediction only].	1	0	338	678	0.333333
225030	COG2119	Gdt1	Putative Ca2+/H+ antiporter, TMEM165/GDT1 family [General function prediction only].	1	0	338	678	0.333333
225382	COG2826	Tra8	Transposase and inactivated derivatives, IS30 family [Mobilome: prophages, transposons].	1	0	338	678	0.333333
225523	COG2976	YfgM	Putative negative regulator of RcsB-dependent stress response [Signal transduction mechanisms].	1	0	338	678	0.333333
225605	COG3063	PilF	Tfp pilus assembly protein PilF [Cell motility, Extracellular structures].	1	0	338	678	0.333333
225669	COG3127	YbbP	Predicted ABC-type transport system involved in lysophospholipase L1 biosynthesis, permease component [Secondary metabolites biosynthesis, transport and catabolism].	1	0	338	678	0.333333
225956	COG3422	YegP	Uncharacterized conserved protein YegP, UPF0339 family [Function unknown].	1	0	338	678	0.333333
225979	COG3448	COG3448	CBS-domain-containing membrane protein [Signal transduction mechanisms].	1	0	338	678	0.333333
226314	COG3791	COG3791	Uncharacterized conserved protein [Function unknown].	1	0	338	678	0.333333
226456	COG3947	SAPR	Two-component response regulator, SAPR family, consists of REC, wHTH and BTAD domains [Signal transduction mechanisms, Transcription].	1	0	338	678	0.333333
226476	COG3967	DltE	Short-chain dehydrogenase involved in D-alanine esterification of teichoic acids [Cell wall/membrane/envelope biogenesis, Lipid transport and metabolism].	1	0	338	678	0.333333
226479	COG3970	COG3970	Fumarylacetoacetate (FAA) hydrolase family protein [General function prediction only].	1	0	338	678	0.333333
226590	COG4105	BamD	Outer membrane protein assembly factor BamD, BamD/ComL family [Cell wall/membrane/envelope biogenesis].	1	0	338	678	0.333333
226654	COG4191	COG4191	Signal transduction histidine kinase regulating C4-dicarboxylate transport system [Signal transduction mechanisms].	1	0	338	678	0.333333
226672	COG4219	MecR1	Signal transducer regulating beta-lactamase production, contains metallopeptidase domain [Signal transduction mechanisms].	1	0	338	678	0.333333
226809	COG4372	COG4372	Uncharacterized conserved protein, contains DUF3084 domain [Function unknown].	1	0	338	678	0.333333
227135	COG4798	COG4798	Predicted methyltransferase [General function prediction only].	1	0	338	678	0.333333
227250	COG4913	COG4913	Uncharacterized protein, contains a C-terminal ATPase domain [Function unknown].	1	0	338	678	0.333333
227268	COG4932	COG4932	Uncharacterized surface anchored protein [Function unknown].	1	0	338	678	0.333333
227283	COG4947	COG4947	Esterase/lipase superfamily enzyme [General function prediction only].	1	0	338	678	0.333333
227731	COG5444	YeeF	Predicted ribonuclease, toxin component of the YeeF-YezG toxin-antitoxin module [Defense mechanisms].	1	0	338	678	0.333333
234749	PRK00405	rpoB	DNA-directed RNA polymerase subunit beta; Reviewed	1	0	338	678	0.333333
234978	PRK01747	mnmC	bifunctional tRNA (mnm(5)s(2)U34)-methyltransferase/FAD-dependent cmnm(5)s(2)U34 oxidoreductase; Reviewed	1	0	338	678	0.333333
235010	PRK02186	PRK02186	argininosuccinate lyase; Provisional	1	0	338	678	0.333333
235068	PRK02769	PRK02769	histidine decarboxylase; Provisional	1	0	338	678	0.333333
235141	PRK03620	PRK03620	5-dehydro-4-deoxyglucarate dehydratase; Provisional	1	0	338	678	0.333333
235175	PRK03918	PRK03918	chromosome segregation protein; Provisional	1	0	338	678	0.333333
235445	PRK05402	PRK05402	glycogen branching enzyme; Provisional	1	0	338	678	0.333333
235726	PRK06181	PRK06181	short chain dehydrogenase; Provisional	1	0	338	678	0.333333
235736	PRK06196	PRK06196	oxidoreductase; Provisional	1	0	338	678	0.333333
235870	PRK06834	PRK06834	hypothetical protein; Provisional	1	0	338	678	0.333333
236101	PRK07803	sdhA	succinate dehydrogenase flavoprotein subunit; Reviewed	1	0	338	678	0.333333
236122	PRK07877	PRK07877	hypothetical protein; Provisional	1	0	338	678	0.333333
236402	PRK09191	PRK09191	two-component response regulator; Provisional	1	0	338	678	0.333333
236461	PRK09302	PRK09302	circadian clock protein KaiC; Reviewed	1	0	338	678	0.333333
237086	PRK12386	PRK12386	fumarate reductase iron-sulfur subunit; Provisional	1	0	338	678	0.333333
237343	PRK13304	PRK13304	L-aspartate dehydrogenase; Reviewed	1	0	338	678	0.333333
237410	PRK13524	PRK13524	outer membrane receptor FepA; Provisional	1	0	338	678	0.333333
237435	PRK13579	gcvT	glycine cleavage system aminomethyltransferase T; Provisional	1	0	338	678	0.333333
237891	PRK15061	PRK15061	catalase/hydroperoxidase HPI(I); Provisional	1	0	338	678	0.333333
238050	cd00102	IPT	Immunoglobulin-like fold, Plexins, Transcription factors (IPT).	1	0	338	678	0.333333
238121	cd00200	WD40	WD40 domain, found in a number of eukaryotic proteins that cover a wide variety of functions including adaptor/regulatory modules in signal transduction, pre-mRNA processing and cytoskeleton assembly; typically contains a GH dipeptide 11-24 residues from its N-terminus and the WD dipeptide at its C-terminus and is 40 residues long, hence the name WD40; between GH and WD lies a conserved core; ser…	1	0	338	678	0.333333
238247	cd00433	Peptidase_M17	Cytosol aminopeptidase family, N-terminal and catalytic domains.	1	0	338	678	0.333333
238506	cd01034	EriC_like	ClC chloride channel family.	1	0	338	678	0.333333
238615	cd01288	FabZ	FabZ is a 17kD beta-hydroxyacyl-acyl carrier protein (ACP) dehydratase that primarily catalyzes the dehydration of beta-hydroxyacyl-ACP to trans-2-acyl-ACP, the third step in the elongation phase of the bacterial/ plastid, type II, fatty-acid biosynthesis pathway.	1	0	338	678	0.333333
238860	cd01822	Lysophospholipase_L1_like	Lysophospholipase L1-like subgroup of SGNH-hydrolases.	1	0	338	678	0.333333
238885	cd01902	Ntn_CGH	Choloylglycine hydrolase (CGH) is a bile salt-modifying enzyme that hydrolyzes non-peptide carbon-nitrogen bonds in choloylglycine and choloyltaurine, both of which are present in bile.	1	0	338	678	0.333333
239218	cd02885	IPP_Isomerase	Isopentenyl diphosphate (IPP) isomerase, a member of the Nudix hydrolase superfamily, is a key enzyme in the isoprenoid biosynthetic pathway.	1	0	338	678	0.333333
239276	cd02978	KaiB_like	KaiB-like family; composed of the circadian clock proteins, KaiB and the N-terminal KaiB-like sensory domain of SasA.	1	0	338	678	0.333333
239526	cd03442	BFIT_BACH	Brown fat-inducible thioesterase (BFIT).	1	0	338	678	0.333333
239534	cd03450	NodN	NodN (nodulation factor N) contains a single hot dog fold similar to those of the peroxisomal Hydratase-Dehydrogenase-Epimerase (HDE) protein, and the fatty acid synthase beta subunit.	1	0	338	678	0.333333
240084	cd04733	OYE_like_2_FMN	Old yellow enzyme (OYE)-related FMN binding domain, group 2.	1	0	338	678	0.333333
259816	cd13438	SPFH_eoslipins_u2	Uncharacterized prokaryotic subgroup of the stomatin-like proteins (slipins) family; belonging to the SPFH (stomatin, prohibitin, flotillin, and HflK/C) superfamily.	1	0	338	678	0.333333
270353	cd13635	PBP2_Ttha1568_Mqnd	A menaquinone biosynthetic enzyme exhibits the type 2 periplasmic-binding protein fold.	1	0	338	678	0.333333
271147	cd04081	CBM35_galactosidase-like	Carbohydrate Binding Module family 35 (CBM35); appended mainly to enzymes that bind alpha-D-galactose (CBM35-Gal), including glycoside hydrolase (GH) families GH27 and GH43.	1	0	338	678	0.333333
271177	cd00796	INT_Rci_Hp1_C	Shufflon-specific DNA recombinase Rci and Bacteriophage Hp1_like integrase, C-terminal catalytic domain.	1	0	338	678	0.333333
271319	cd15457	NADAR	Escherichia coli swarming motility protein YbiA and related proteins.	1	0	338	678	0.333333
272913	TIGR00115	tig	trigger factor.	1	0	338	678	0.333333
272953	TIGR00194	uvrC	excinuclease ABC, C subunit.	1	0	338	678	0.333333
273350	TIGR00937	2A51	chromate transporter, chromate ion transporter (CHR) family.	1	0	338	678	0.333333
273419	TIGR01056	topB	DNA topoisomerase III, bacteria and conjugative plasmid.	1	0	338	678	0.333333
273616	TIGR01426	MGT	glycosyltransferase, MGT family.	1	0	338	678	0.333333
273765	TIGR01701	Fdhalpha-like	oxidoreductase alpha (molybdopterin) subunit.	1	0	338	678	0.333333
275778	cl02773	HTTM	Horizontally Transferred TransMembrane Domain.	1	0	338	678	0.333333
282957	pfam05170	AsmA	AsmA family.	1	0	338	678	0.333333
293828	cd07742	metallo-hydrolase-like_MBL-fold	uncharacterized subgroup of the MBL-fold_metallo-hydrolase superfamily; MBL-fold metallo hydrolase domain.	1	0	338	678	0.333333
307000	pfam00654	Voltage_CLC	Voltage gated chloride channel.	1	0	338	678	0.333333
308299	pfam02604	PhdYeFM_antitox	Antitoxin Phd_YefM, type II toxin-antitoxin system.	1	0	338	678	0.333333
308509	pfam02897	Peptidase_S9_N	Prolyl oligopeptidase, N-terminal beta-propeller domain.	1	0	338	678	0.333333
310269	pfam05547	Peptidase_M6	Immune inhibitor A peptidase M6.	1	0	338	678	0.333333
310420	pfam05816	TelA	Toxic anion resistance protein (TelA).	1	0	338	678	0.333333
312892	pfam09537	DUF2383	Domain of unknown function (DUF2383).	1	0	338	678	0.333333
313132	pfam09848	DUF2075	Uncharacterized conserved protein (DUF2075).	1	0	338	678	0.333333
313246	pfam09983	DUF2220	Uncharacterized protein conserved in bacteria C-term(DUF2220).	1	0	338	678	0.333333
313348	pfam10102	DUF2341	Domain of unknown function (DUF2341).	1	0	338	678	0.333333
314082	pfam11051	Mannosyl_trans3	Mannosyltransferase putative.	1	0	338	678	0.333333
314631	pfam11795	DUF3322	Uncharacterized protein conserved in bacteria N-term (DUF3322).	1	0	338	678	0.333333
315245	pfam12532	DUF3732	Protein of unknown function (DUF3732).	1	0	338	678	0.333333
315613	pfam12964	DUF3853	Protein of unknown function (DUF3853).	1	0	338	678	0.333333
315701	pfam13088	BNR_2	BNR repeat-like domain.	1	0	338	678	0.333333
315754	pfam13160	DUF3995	Protein of unknown function (DUF3995).	1	0	338	678	0.333333
316006	pfam13443	HTH_26	Cro/C1-type HTH DNA-binding domain.	1	0	338	678	0.333333
316280	pfam13743	Thioredoxin_5	Thioredoxin.	1	0	338	678	0.333333
316635	pfam14125	DUF4292	Domain of unknown function (DUF4292).	1	0	338	678	0.333333
316828	pfam14339	DUF4394	Domain of unknown function (DUF4394).	1	0	338	678	0.333333
318035	pfam15738	YafQ_toxin	Bacterial toxin of type II toxin-antitoxin system, YafQ.	1	0	338	678	0.333333
318401	pfam16156	DUF4864	Domain of unknown function (DUF4864).	1	0	338	678	0.333333
319011	pfam16927	HisKA_7TM	N-terminal 7TM region of histidine kinase.	1	0	338	678	0.333333
319147	pfam17128	DUF5107	Domain of unknown function (DUF5107).	1	0	338	678	0.333333
319781	cd02089	P-type_ATPase_Ca_prok	prokaryotic P-type Ca(2+)-ATPase similar to Synechococcus elongatus sp.	1	0	338	678	0.333333
319895	cd16373	DMSOR_beta_like	uncharacterized subfamily of DMSO Reductase beta subunit family.	1	0	338	678	0.333333
320691	cd07332	M48C_Oma1_like	Peptidase M48C Ste24p, integral membrane endopeptidase.	1	0	338	678	0.333333
321015	cl00514	Nitro_FMN_reductase	N/A.	1	0	338	678	0.333333
321436	cl01298	Glyco_transf_25	N/A.	1	0	338	678	0.333333
322229	cl03205	Jacalin_like	Jacalin-like lectin domain.	1	0	338	678	0.333333
327549	cl19409	Cad	Cadmium resistance transporter.	1	0	338	678	0.333333
328741	cl21479	Cas5_I	CRISPR/Cas system-associated RAMP superfamily protein Cas5.	1	0	338	678	0.333333
328778	cl21533	Cas8a1_I-A	CRISPR/Cas system-associated protein Cas8a1.	1	0	338	678	0.333333
333416	cl28596	NhaC	Na+/H+ antiporter NhaC [Energy production and conversion].	1	0	338	678	0.333333
333752	NF033092	HK_WalK	cell wall metabolism sensor histidine kinase WalK.	1	0	338	678	0.333333
333810	pfam00067	p450	Cytochrome P450.	1	0	338	678	0.333333
334009	pfam00328	His_Phos_2	Histidine phosphatase superfamily (branch 2).	1	0	338	678	0.333333
334163	pfam00589	Phage_integrase	Phage integrase family.	1	0	338	678	0.333333
334258	pfam00797	Acetyltransf_2	N-acetyltransferase.	1	0	338	678	0.333333
334614	pfam01625	PMSR	Peptide methionine sulfoxide reductase.	1	0	338	678	0.333333
334620	pfam01640	Peptidase_C10	Peptidase C10 family.	1	0	338	678	0.333333
334656	pfam01731	Arylesterase	Arylesterase.	1	0	338	678	0.333333
334788	pfam02018	CBM_4_9	Carbohydrate binding domain.	1	0	338	678	0.333333
335019	pfam02635	DrsE	DsrE/DsrF-like family.	1	0	338	678	0.333333
335021	pfam02641	DUF190	Uncharacterized ACR, COG1993.	1	0	338	678	0.333333
335197	pfam03050	DDE_Tnp_IS66	Transposase IS66 family.	1	0	338	678	0.333333
335361	pfam03514	GRAS	GRAS domain family.	1	0	338	678	0.333333
335485	pfam03808	Glyco_tran_WecB	Glycosyl transferase WecB/TagA/CpsF family.	1	0	338	678	0.333333
335536	pfam03928	Haem_degrading	Haem-degrading.	1	0	338	678	0.333333
335577	pfam04015	DUF362	Domain of unknown function (DUF362).	1	0	338	678	0.333333
335579	pfam04018	DUF368	Domain of unknown function (DUF368).	1	0	338	678	0.333333
335684	pfam04245	NA37	37-kD nucleoid-associated bacterial protein.	1	0	338	678	0.333333
335711	pfam04304	DUF454	Protein of unknown function (DUF454).	1	0	338	678	0.333333
335811	pfam04493	Endonuclease_5	Endonuclease V.	1	0	338	678	0.333333
335963	pfam04972	BON	BON domain.	1	0	338	678	0.333333
335967	pfam04982	HPP	HPP family.	1	0	338	678	0.333333
336029	pfam05145	AbrB	Transition state regulatory protein AbrB.	1	0	338	678	0.333333
336266	pfam05987	DUF898	Bacterial protein of unknown function (DUF898).	1	0	338	678	0.333333
336311	pfam06127	DUF962	Protein of unknown function (DUF962).	1	0	338	678	0.333333
336559	pfam06964	Alpha-L-AF_C	Alpha-L-arabinofuranosidase C-terminal domain.	1	0	338	678	0.333333
336708	pfam07484	Collar	Phage Tail Collar Domain.	1	0	338	678	0.333333
337211	pfam08803	ydhR	Putative mono-oxygenase ydhR.	1	0	338	678	0.333333
337234	pfam08878	DUF1837	Domain of unknown function (DUF1837).	1	0	338	678	0.333333
337302	pfam09127	Leuk-A4-hydro_C	Leukotriene A4 hydrolase, C-terminal.	1	0	338	678	0.333333
337381	pfam09360	zf-CDGSH	Iron-binding zinc finger CDGSH type.	1	0	338	678	0.333333
337487	pfam09722	DUF2384	Protein of unknown function (DUF2384).	1	0	338	678	0.333333
337569	pfam09945	DUF2177	Predicted membrane protein (DUF2177).	1	0	338	678	0.333333
338447	pfam12686	DUF3800	Protein of unknown function (DUF3800).	1	0	338	678	0.333333
338682	pfam13333	rve_2	Integrase core domain.	1	0	338	678	0.333333
338820	pfam13563	2_5_RNA_ligase2	2'-5' RNA ligase superfamily.	1	0	338	678	0.333333
338825	pfam13569	DUF4132	Domain of unknown function (DUF4132).	1	0	338	678	0.333333
338837	pfam13593	SBF_like	SBF-like CPA transporter family (DUF4137).	1	0	338	678	0.333333
338889	pfam13673	Acetyltransf_10	Acetyltransferase (GNAT) domain.	1	0	338	678	0.333333
338965	pfam13835	DUF4194	Domain of unknown function (DUF4194).	1	0	338	678	0.333333
339003	pfam13924	Lipocalin_5	Lipocalin-like domain.	1	0	338	678	0.333333
339142	pfam14281	PDDEXK_4	PD-(D/E)XK nuclease superfamily.	1	0	338	678	0.333333
339179	pfam14340	DUF4395	Domain of unknown function (DUF4395).	1	0	338	678	0.333333
339225	pfam14436	EndoU_bacteria	Bacterial EndoU nuclease.	1	0	338	678	0.333333
339242	pfam14491	DUF4435	Protein of unknown function (DUF4435).	1	0	338	678	0.333333
339572	pfam16011	CBM9_2	Carbohydrate-binding family 9.	1	0	338	678	0.333333
339902	pfam17138	DUF5111	Domain of unknown function (DUF5111).	1	0	338	678	0.333333
339905	pfam17141	DUF5114	Domain of unknown function (DUF5114).	1	0	338	678	0.333333
339915	pfam17161	DUF5123	Domain of unknown function (DUF5123).	1	0	338	678	0.333333
339978	pfam17262	DUF5328	Family of unknown function (DUF5328).	1	0	338	678	0.333333
340432	cd16956	HATPase_YehU-like	Histidine kinase-like ATPase domain of two-component sensor histidine kinases similar to Escherichia coli YehU.	1	0	338	678	0.333333
340888	cd17330	MFS_SLC46_TetA_like	Eukaryotic Solute carrier 46 (SLC46) family, Bacterial Tetracycline resistance proteins, and similar proteins of the Major Facilitator Superfamily of transporters.	1	0	338	678	0.333333
340998	cd17440	MFS_SV2C	Synaptic vesicle glycoprotein 2C of the Major Facilitator Superfamily of transporters.	1	0	338	678	0.333333
341038	cd17485	MFS_MFSD3	Major facilitator superfamily domain containing 3 protein.	1	0	338	678	0.333333
341062	cd09599	M1_LTA4H	Peptidase M1 family including Leukotriene A4 hydrolase catalytic domain.	1	0	338	678	0.333333
341148	cd17259	RMtype1_S_StySKI-TRD2-CR2_like	Type I restriction-modification system specificity (S) subunit Target Recognition Domain-ConseRved domain (TRD-CR), similar to TRD2-CR2's of StySKI, S.	1	0	338	678	0.333333
341149	cd17260	RMtype1_S_EcoEI-TRD1-CR1_like	Type I restriction-modification system specificity (S) subunit Target Recognition Domain-ConseRved domain (TRD-CR), similar to S.	1	0	338	678	0.333333
341150	cd17261	RMtype1_S_EcoKI-TRD2-CR2_like	Type I restriction-modification system specificity (S) subunit TRD-CR, similar to Escherichia coli str.	1	0	338	678	0.333333
341181	cd17292	RMtype1_S_LlaA17I_TRD2-CR2_like	Type I restriction-modification system specificity (S) subunit Target Recognition Domain-ConseRved domain (TRD-CR), similar to the S subunit TRD2-CR2 regions of Lactococcus lactis subsp.	1	0	338	678	0.333333
341186	cd17495	RMtype1_S_Cep9333ORF4827P-TRD2-CR2_like	Type I restriction-modification system specificity (S) subunit Target Recognition Domain-ConseRved domain (TRD-CR), similar to Crinalium epipsammum S subunit (S.	1	0	338	678	0.333333
341246	cd05922	FACL_like_6	Uncharacterized subfamily of fatty acid CoA ligase (FACL).	1	0	338	678	0.333333
349432	cd03859	M14_CPT	Peptidase M14 Carboxypeptidase T subfamily.	1	0	338	678	0.333333
350109	cd08995	GH32_EcAec43-like	Glycosyl hydrolase family 32, such as the putative glycoside hydrolase Escherichia coli Aec43 (FosGH2).	1	0	338	678	0.333333
350338	cd12913	PDC1_MCP_like	first PDC (PhoQ/DcuS/CitA) domain of methyl-accepting chemotaxis proteins and similar domains.	1	0	338	678	0.333333
350610	cd14728	Ere-like	Erythromycin esterase and succinoglycan biosynthesis related proteins.	1	0	338	678	0.333333
350677	cd17919	DEXHc_Snf	DEXH/Q-box helicase domain of DEAD-like helicase Snf family proteins.	1	0	338	678	0.333333
350688	cd17930	DEXHc_cas3	DEXH/Q-box helicase domain of Cas3.	1	0	338	678	0.333333
350690	cd17932	DEXQc_UvrD	DEXQD-box helicase domain of UvrD.	1	0	338	678	0.333333
350944	cl00199	SO_family_Moco	N/A.	1	0	338	678	0.333333
350956	cl00214	Aldolase_II	N/A.	1	0	338	678	0.333333
351111	cl00480	RraA-like	Aldolase/RraA.	1	0	338	678	0.333333
351141	cl00535	Oxidored_q4	NADH-ubiquinone/plastoquinone oxidoreductase, chain 3.	1	0	338	678	0.333333
351191	cl00641	Cas4_I-A_I-B_I-C_I-D_II-B	CRISPR/Cas system-associated protein Cas4.	1	0	338	678	0.333333
351370	cl01077	SIMPL	Protein of unknown function (DUF541).	1	0	338	678	0.333333
351515	cl01465	Cas7_I-C	CRISPR/Cas system-associated RAMP superfamily protein Cas7.	1	0	338	678	0.333333
351704	cl02211	DUF983	Protein of unknown function (DUF983).	1	0	338	678	0.333333
351708	cl02228	ATP12	ATP12 chaperone protein.	1	0	338	678	0.333333
351780	cl02511	GH64-TLP-SF	glycoside hydrolase family 64 (beta-1,3-glucanases which produce specific pentasaccharide oligomers) and thaumatin-like proteins.	1	0	338	678	0.333333
352836	cl07893	AmyAc_family	Alpha amylase catalytic domain family.	1	0	338	678	0.333333
352940	cl09153	PhdYeFM_antitox	Antitoxin Phd_YefM, type II toxin-antitoxin system.	1	0	338	678	0.333333
353929	cl15257	GIY-YIG_SF	GIY-YIG nuclease domain superfamily.	1	0	338	678	0.333333
354321	cl17194	Oxidored_q6	NADH ubiquinone oxidoreductase, 20 Kd subunit.	1	0	338	678	0.333333
354817	cl21461	Globin_like	Globin-like proteins.	1	0	338	678	0.333333
354851	cl21522	FN3	N/A.	1	0	338	678	0.333333
354885	cl21601	zf-CHC2	CHC2 zinc finger.	1	0	338	678	0.333333
355667	cl27635	Ala_racemase_N	Alanine racemase, N-terminal domain.	1	0	338	678	0.333333
356469	cl29593	WD40	N/A.	1	0	338	678	0.333333
357335	cl30459	Cyt_C5_DNA_methylase	N/A.	1	0	338	678	0.333333
129911	TIGR00831	a_cpa1	Na+/H+ antiporter, bacterial form.	4	5	335	673	0.349287
223571	COG0497	RecN	DNA repair ATPase RecN [Replication, recombination and repair].	4	5	335	673	0.349287
226194	COG3668	ParE	Plasmid stabilization system protein ParE [Mobilome: prophages, transposons].	4	5	335	673	0.349287
311567	pfam07695	7TMR-DISM_7TM	7TM diverse intracellular signalling.	4	5	335	673	0.349287
319869	cd16377	23S_rRNA_IVP_like	23S rRNA-intervening sequence protein and similar proteins.	4	5	335	673	0.349287
339106	pfam14135	DUF4302	Domain of unknown function (DUF4302).	4	5	335	673	0.349287
339901	pfam17137	DUF5110	Domain of unknown function (DUF5110).	4	5	335	673	0.349287
353032	cl09938	cond_enzymes	N/A.	4	5	335	673	0.349287
224544	COG1629	CirA	Outer membrane receptor proteins, mostly Fe transport [Inorganic ion transport and metabolism].	5	7	334	671	0.368005
352932	cl09109	NTF2_like	N/A.	5	7	334	671	0.368005
302697	cl18310	NHL	NHL repeat unit of beta-propeller proteins.	7	11	332	667	0.390901
224439	COG1522	Lrp	DNA-binding transcriptional regulator, Lrp family [Transcription].	8	13	331	665	0.398599
353816	cl14632	VOC	vicinal oxygen chelate (VOC) family.	8	13	331	665	0.398599
99749	cd06260	DUF820	Domain of unknown function (DUF820).	2	2	337	676	0.407407
129018	smart00782	PhnA_Zn_Ribbon	PhnA Zinc-Ribbon.	2	2	337	676	0.407407
176509	cd08566	GDPD_AtGDE_like	Glycerophosphodiester phosphodiesterase domain of Agrobacterium tumefaciens and similar proteins.	2	2	337	676	0.407407
179004	PRK00399	rpmH	50S ribosomal protein L34; Reviewed	2	2	337	676	0.407407
183566	PRK12513	PRK12513	RNA polymerase sigma factor; Provisional	2	2	337	676	0.407407
187550	cd05239	GDP_FS_SDR_e	GDP-fucose synthetase, extended (e) SDRs.	2	2	337	676	0.407407
198396	cd10449	GIY-YIG_SLX1_like	Catalytic GIY-YIG domain of yeast structure-specific endonuclease subunit SLX1 and its homologs.	2	2	337	676	0.407407
222853	PHA02517	PHA02517	putative transposase OrfB; Reviewed	2	2	337	676	0.407407
223527	COG0450	AhpC	Alkyl hydroperoxide reductase subunit AhpC (peroxiredoxin) [Defense mechanisms].	2	2	337	676	0.407407
223691	COG0618	NrnA	nanoRNase/pAp phosphatase, hydrolyzes c-di-AMP and oligoRNAs [Nucleotide transport and metabolism].	2	2	337	676	0.407407
223729	COG0656	ARA1	Aldo/keto reductase, related to diketogulonate reductase [Secondary metabolites biosynthesis, transport and catabolism].	2	2	337	676	0.407407
224108	COG1187	RsuA	16S rRNA U516 pseudouridylate synthase RsuA and related 23S rRNA U2605, pseudouridylate synthases [Translation, ribosomal structure and biogenesis].	2	2	337	676	0.407407
224276	COG1357	YjbI	Uncharacterized protein YjbI, contains pentapeptide repeats [Function unknown].	2	2	337	676	0.407407
224512	COG1596	Wza	Periplasmic protein involved in polysaccharide export, contains SLBB domain of the beta-grasp fold [Cell wall/membrane/envelope biogenesis].	2	2	337	676	0.407407
224643	COG1729	YbgF	Periplasmic TolA-binding protein (function unknown) [General function prediction only].	2	2	337	676	0.407407
225158	COG2249	MdaB	Putative NADPH-quinone reductase (modulator of drug activity B) [General function prediction only].	2	2	337	676	0.407407
225439	COG2885	OmpA	Outer membrane protein OmpA and related peptidoglycan-associated (lipo)proteins [Cell wall/membrane/envelope biogenesis].	2	2	337	676	0.407407
227112	COG4771	FepA	Outer membrane receptor for ferrienterochelin and colicins [Inorganic ion transport and metabolism].	2	2	337	676	0.407407
234607	PRK00062	PRK00062	glutamate-1-semialdehyde aminotransferase; Provisional	2	2	337	676	0.407407
234608	PRK00064	recF	recombination protein F; Reviewed	2	2	337	676	0.407407
234792	PRK00558	uvrC	excinuclease ABC subunit C; Validated	2	2	337	676	0.407407
235571	PRK05704	PRK05704	dihydrolipoamide succinyltransferase; Validated	2	2	337	676	0.407407
236946	PRK11649	PRK11649	putative peptidase; Provisional	2	2	337	676	0.407407
237426	PRK13558	PRK13558	bacterio-opsin activator; Provisional	2	2	337	676	0.407407
238309	cd00553	NAD_synthase	NAD+ synthase is a homodimer, which catalyzes the final step in de novo nicotinamide adenine dinucleotide (NAD+) biosynthesis, an amide transfer from either ammonia or glutamine to nicotinic acid adenine dinucleotide (NaAD).	2	2	337	676	0.407407
238384	cd00755	YgdL_like	Family of activating enzymes (E1) of ubiquitin-like proteins related to the E.	2	2	337	676	0.407407
240544	cd13139	MATE_like_14	Uncharacterized subfamily of the multidrug and toxic compound extrusion (MATE) proteins.	2	2	337	676	0.407407
270916	cd14014	STKc_PknB_like	Catalytic domain of bacterial Serine/Threonine kinases, PknB and similar proteins.	2	2	337	676	0.407407
271175	cd00397	DNA_BRE_C	DNA breaking-rejoining enzymes, C-terminal catalytic domain.	2	2	337	676	0.407407
271342	cd14948	BACON	Bacteroidetes-Associated Carbohydrate-binding (putative) Often N-terminal (BACON) domain.	2	2	337	676	0.407407
273901	TIGR01970	DEAH_box_HrpB	ATP-dependent helicase HrpB.	2	2	337	676	0.407407
283365	pfam05685	Uma2	Putative restriction endonuclease.	2	2	337	676	0.407407
296175	cl03994	Trp_dioxygenase	Tryptophan 2,3-dioxygenase.	2	2	337	676	0.407407
307413	pfam01242	PTPS	6-pyruvoyl tetrahydropterin synthase.	2	2	337	676	0.407407
308472	pfam02837	Glyco_hydro_2_N	Glycosyl hydrolases family 2, sugar binding domain.	2	2	337	676	0.407407
315710	pfam13098	Thioredoxin_2	Thioredoxin-like domain.	2	2	337	676	0.407407
319898	cd06587	VOC	vicinal oxygen chelate (VOC) family.	2	2	337	676	0.407407
334364	pfam01055	Glyco_hydro_31	Glycosyl hydrolases family 31.	2	2	337	676	0.407407
334731	pfam01894	UPF0047	Uncharacterized protein family UPF0047.	2	2	337	676	0.407407
335495	pfam03831	PhnA	PhnA domain.	2	2	337	676	0.407407
336696	pfam07411	DUF1508	Domain of unknown function (DUF1508).	2	2	337	676	0.407407
337527	pfam09835	DUF2062	Uncharacterized protein conserved in bacteria (DUF2062).	2	2	337	676	0.407407
337552	pfam09912	DUF2141	Uncharacterized protein conserved in bacteria (DUF2141).	2	2	337	676	0.407407
338832	pfam13584	BatD	Oxygen tolerance.	2	2	337	676	0.407407
339475	pfam15418	DUF4625	Domain of unknown function (DUF4625).	2	2	337	676	0.407407
340363	cd00737	lyz_endolysin_autolysin	endolysin and autolysin.	2	2	337	676	0.407407
340824	cd03793	GT3_GSY2-like	glycogen synthase GSY2 and similar proteins.	2	2	337	676	0.407407
351101	cl00457	Ribonuclease_P	Ribonuclease P.	2	2	337	676	0.407407
351923	cl02948	GH20_hexosaminidase	N/A.	2	2	337	676	0.407407
357606	cl30730	DAO	FAD dependent oxidoreductase.	2	2	337	676	0.407407
197715	smart00421	HTH_LUXR	helix_turn_helix, Lux Regulon.	3	4	336	674	0.429355
223354	COG0277	GlcD	FAD/FMN-containing dehydrogenase [Energy production and conversion].	3	4	336	674	0.429355
235470	PRK05444	PRK05444	1-deoxy-D-xylulose-5-phosphate synthase; Provisional	3	4	336	674	0.429355
235681	PRK06039	ileS	isoleucyl-tRNA synthetase; Reviewed	3	4	336	674	0.429355
237185	PRK12739	PRK12739	elongation factor G; Reviewed	3	4	336	674	0.429355
237816	PRK14788	PRK14788	lipoprotein signal peptidase; Provisional	3	4	336	674	0.429355
273335	TIGR00915	2A0602	The (Largely Gram-negative Bacterial) Hydrophobe/Amphiphile Efflux-1 (HAE1) Family.	3	4	336	674	0.429355
320700	cd07341	M56_BlaR1_MecR1_like	Peptidase M56-like including those in BlaR1 and MecR1, integral membrane metallopeptidase.	3	4	336	674	0.429355
335515	pfam03880	DbpA	DbpA RNA binding domain.	3	4	336	674	0.429355
350998	cl00276	Maf_Ham1	N/A.	3	4	336	674	0.429355
197666	smart00342	HTH_ARAC	helix_turn_helix, arabinose operon control protein.	16	29	323	649	0.429539
225814	COG3275	LytS	Sensor histidine kinase, LytS/YehU family [Signal transduction mechanisms].	19	35	320	643	0.435403
223327	COG0249	MutS	DNA mismatch repair ATPase MutS [Replication, recombination and repair].	4	6	335	672	0.440735
270212	cd14752	GH31_N	N-terminal domain of glycosyl hydrolase family 31 (GH31).	4	6	335	672	0.440735
333740	NF012211	tand_rpt_95	tandem-95 repeat.	4	6	335	672	0.440735
315812	pfam13229	Beta_helix	Right handed beta helix region.	5	8	334	670	0.44796
224635	COG1721	YeaD2	Uncharacterized conserved protein, DUF58 family, contains vWF domain [Function unknown].	6	10	333	668	0.453062
335890	pfam04773	FecR	FecR protein.	7	12	332	666	0.45691
333874	pfam00144	Beta-lactamase	Beta-lactamase.	12	22	327	656	0.467762
226235	COG3712	FecR	periplasmic ferric-dicitrate binding protein FecR, regulates iron transport through sigma-19 [Inorganic ion transport and metabolism, Signal transduction mechanisms].	13	24	326	654	0.469094
273776	TIGR01730	RND_mfp	RND family efflux transporter, MFP subunit.	13	24	326	654	0.469094
354816	cl21460	HAD_like	Haloacid Dehalogenase-like Hydrolases.	10	19	329	659	0.518015
357489	cl30613	LacZ	Beta-galactosidase/beta-glucuronidase [Carbohydrate transport and metabolism].	7	13	332	665	0.521291
223340	COG0262	FolA	Dihydrofolate reductase [Coenzyme transport and metabolism].	5	9	334	669	0.52503
224851	COG1940	NagC	Sugar kinase of the NBD/HSP70 family, may contain an N-terminal HTH domain [Transcription, Carbohydrate transport and metabolism].	5	9	334	669	0.52503
338445	pfam12680	SnoaL_2	SnoaL-like domain.	4	7	335	671	0.527915
350885	cl00064	ZnMc	N/A.	4	7	335	671	0.527915
223594	COG0520	CsdA	Selenocysteine lyase/Cysteine desulfurase [Amino acid transport and metabolism].	3	5	336	673	0.532183
223737	COG0665	DadA	Glycine/D-amino acid oxidase (deaminating) [Amino acid transport and metabolism].	3	5	336	673	0.532183
237597	PRK14054	PRK14054	methionine sulfoxide reductase A; Provisional	3	5	336	673	0.532183
281534	pfam03544	TonB_C	Gram-negative bacterial TonB protein C-terminal.	3	5	336	673	0.532183
308281	pfam02585	PIG-L	GlcNAc-PI de-N-acetylase.	3	5	336	673	0.532183
318541	pfam16338	DUF4968	Domain of unknown function (DUF4968).	3	5	336	673	0.532183
337405	pfam09413	DUF2007	Putative prokaryotic signal transducing protein.	3	5	336	673	0.532183
350937	cl00192	ribokinase_pfkB_like	N/A.	3	5	336	673	0.532183
223715	COG0642	BaeS	Signal transduction histidine kinase [Signal transduction mechanisms].	40	80	299	598	0.537576
100051	cd04645	LbH_gamma_CA_like	Gamma carbonic anhydrase-like: This family is composed of gamma carbonic anhydrase (CA), Ferripyochelin Binding Protein (FBP), E.	2	3	337	675	0.539419
153118	cd07909	YciF	YciF bacterial stress response protein, ferritin-like iron-binding domain.	2	3	337	675	0.539419
179055	PRK00522	tpx	lipid hydroperoxide peroxidase; Provisional	2	3	337	675	0.539419
197670	smart00347	HTH_MARR	helix_turn_helix multiple antibiotic resistance protein.	2	3	337	675	0.539419
214510	smart00089	PKD	Repeats in polycystic kidney disease 1 (PKD1) and other proteins.	2	3	337	675	0.539419
223650	COG0577	SalY	ABC-type antimicrobial peptide transport system, permease component [Defense mechanisms].	2	3	337	675	0.539419
223861	COG0790	TPR	TPR repeat [Signal transduction mechanisms].	2	3	337	675	0.539419
224563	COG1649	YddW	Uncharacterized lipoprotein YddW, UPF0748 family [Function unknown].	2	3	337	675	0.539419
225113	COG2203	FhlA	GAF domain [Signal transduction mechanisms].	2	3	337	675	0.539419
225253	COG2378	YafY	Predicted DNA-binding transcriptional regulator YafY, contains an HTH and WYL domains [Transcription].	2	3	337	675	0.539419
226202	COG3677	InsA	Transposase [Mobilome: prophages, transposons].	2	3	337	675	0.539419
226855	COG4447	COG4447	Uncharacterized protein related to plant photosystem II stability/assembly factor [General function prediction only].	2	3	337	675	0.539419
234571	PRK00011	glyA	serine hydroxymethyltransferase; Reviewed	2	3	337	675	0.539419
234679	PRK00179	pgi	glucose-6-phosphate isomerase; Reviewed	2	3	337	675	0.539419
234856	PRK00885	PRK00885	phosphoribosylamine--glycine ligase; Provisional	2	3	337	675	0.539419
235462	PRK05433	PRK05433	GTP-binding protein LepA; Provisional	2	3	337	675	0.539419
236910	PRK11433	PRK11433	aldehyde oxidoreductase 2Fe-2S subunit; Provisional	2	3	337	675	0.539419
239517	cd03425	MutT_pyrophosphohydrolase	The MutT pyrophosphohydrolase is a prototypical Nudix hydrolase that catalyzes the hydrolysis of nucleoside and deoxynucleoside triphosphates (NTPs and dNTPs) by substitution at a beta-phosphorus to yield a nucleotide monophosphate (NMP) and inorganic pyrophosphate (PPi).	2	3	337	675	0.539419
273649	TIGR01480	copper_res_A	copper-resistance protein, CopA family.	2	3	337	675	0.539419
274646	TIGR03558	oxido_grp_1	luciferase family oxidoreductase, group 1.	2	3	337	675	0.539419
274915	TIGR04001	thiol_BshB1	bacillithiol biosynthesis deacetylase BshB1.	2	3	337	675	0.539419
293839	cd16281	metallo-hydrolase-like_MBL-fold	uncharacterized subgroup of the MBL-fold_metallo-hydrolase superfamily; MBL-fold metallo hydrolase domain.	2	3	337	675	0.539419
313799	pfam10652	DUF2480	Protein of unknown function (DUF2480).	2	3	337	675	0.539419
333879	pfam00150	Cellulase	Cellulase (glycosyl hydrolase family 5).	2	3	337	675	0.539419
334742	pfam01923	Cob_adeno_trans	Cobalamin adenosyltransferase.	2	3	337	675	0.539419
334830	pfam02152	FolB	Dihydroneopterin aldolase.	2	3	337	675	0.539419
335729	pfam04336	ACP_PD	Acyl carrier protein phosphodiesterase.	2	3	337	675	0.539419
337090	pfam08522	DUF1735	Domain of unknown function (DUF1735).	2	3	337	675	0.539419
338621	pfam13185	GAF_2	GAF domain.	2	3	337	675	0.539419
338738	pfam13432	TPR_16	Tetratricopeptide repeat.	2	3	337	675	0.539419
338834	pfam13590	DUF4136	Domain of unknown function (DUF4136).	2	3	337	675	0.539419
339781	pfam16576	HlyD_D23	Barrel-sandwich domain of CusB or HlyD membrane-fusion.	2	3	337	675	0.539419
350617	cd14840	D-Ala-D-Ala_dipeptidase_Aad	D-Ala-D-Ala dipeptidase (includes Lactobacillus plantarum Aad peptidase).	2	3	337	675	0.539419
352595	cl06868	FNR_like	N/A.	2	3	337	675	0.539419
354381	cl19107	SPFH_like	core domain of the SPFH (stomatin, prohibitin, flotillin, and HflK/C) superfamily.	2	3	337	675	0.539419
354964	cl22861	LamG	N/A.	2	3	337	675	0.539419
132555	TIGR03516	ppisom_GldI	peptidyl-prolyl isomerase, gliding motility-associated.	1	1	338	677	0.555774
176237	cd08276	MDR7	Medium chain dehydrogenases/reductase (MDR)/zinc-dependent alcohol dehydrogenase-like family.	1	1	338	677	0.555774
180071	PRK05424	rplA	50S ribosomal protein L1; Validated	1	1	338	677	0.555774
181359	PRK08293	PRK08293	3-hydroxybutyryl-CoA dehydrogenase; Validated	1	1	338	677	0.555774
181721	PRK09242	PRK09242	tropinone reductase; Provisional	1	1	338	677	0.555774
182502	PRK10504	PRK10504	putative transporter; Provisional	1	1	338	677	0.555774
183677	PRK12680	PRK12680	transcriptional regulator CysB-like protein; Reviewed	1	1	338	677	0.555774
187558	cd05247	UDP_G4E_1_SDR_e	UDP-glucose 4 epimerase, subgroup 1, extended (e) SDRs.	1	1	338	677	0.555774
187678	cd09620	CBM9_like_3	DOMON-like type 9 carbohydrate binding module.	1	1	338	677	0.555774
187742	cd09209	Lumazine_synthase-I	lumazine synthase (6,7-dimethyl-8-ribityllumazine synthase, LS), catalyzes the penultimate step in the biosynthesis of riboflavin (vitamin B2); type-I.	1	1	338	677	0.555774
187856	cd09725	Cas2_I_II_III	CRISPR/Cas system-associated protein Cas2.	1	1	338	677	0.555774
197317	cd09083	EEP-1	Exonuclease-Endonuclease-Phosphatase domain; uncharacterized family 1.	1	1	338	677	0.555774
214807	smart00758	PA14	domain in bacterial beta-glucosidases other glycosidases, glycosyltransferases, proteases, amidases, yeast adhesins, and bacterial toxins.	1	1	338	677	0.555774
215619	PLN03185	PLN03185	phosphatidylinositol phosphate kinase; Provisional	1	1	338	677	0.555774
222983	PHA03098	PHA03098	kelch-like protein; Provisional	1	1	338	677	0.555774
223247	COG0169	AroE	Shikimate 5-dehydrogenase [Amino acid transport and metabolism].	1	1	338	677	0.555774
223267	COG0189	RimK	Glutathione synthase/RimK-type ligase, ATP-grasp superfamily [Coenzyme transport and metabolism, Translation, ribosomal structure and biogenesis].	1	1	338	677	0.555774
223326	COG0248	GppA	Exopolyphosphatase/pppGpp-phosphohydrolase [Nucleotide transport and metabolism, Signal transduction mechanisms, Inorganic ion transport and metabolism].	1	1	338	677	0.555774
223425	COG0348	NapH	Polyferredoxin [Energy production and conversion].	1	1	338	677	0.555774
223515	COG0438	RfaB	Glycosyltransferase involved in cell wall bisynthesis [Cell wall/membrane/envelope biogenesis].	1	1	338	677	0.555774
223528	COG0451	WcaG	Nucleoside-diphosphate-sugar epimerase [Cell wall/membrane/envelope biogenesis].	1	1	338	677	0.555774
223540	COG0464	SpoVK	AAA+-type ATPase, SpoVK/Ycf46/Vps4 family [Cell wall/membrane/envelope biogenesis, Cell cycle control, cell division, chromosome partitioning, Signal transduction mechanisms].	1	1	338	677	0.555774
223588	COG0514	RecQ	Superfamily II DNA helicase RecQ [Replication, recombination and repair].	1	1	338	677	0.555774
223651	COG0578	GlpA	Glycerol-3-phosphate dehydrogenase [Energy production and conversion].	1	1	338	677	0.555774
223683	COG0610	COG0610	Type I site-specific restriction-modification system, R (restriction) subunit and related helicases .	1	1	338	677	0.555774
223880	COG0810	TonB	Periplasmic protein TonB, links inner and outer membranes [Cell wall/membrane/envelope biogenesis].	1	1	338	677	0.555774
224037	COG1112	DNA2	Superfamily I DNA and/or RNA helicase [Replication, recombination and repair].	1	1	338	677	0.555774
224160	COG1239	ChlI	Mg-chelatase subunit ChlI [Coenzyme transport and metabolism].	1	1	338	677	0.555774
224204	COG1285	SapB	Uncharacterized membrane protein YhiD, involved in acid resistance [Function unknown].	1	1	338	677	0.555774
224576	COG1662	InsB	Transposase and inactivated derivatives, IS1 family [Mobilome: prophages, transposons].	1	1	338	677	0.555774
224991	COG2080	CoxS	Aerobic-type carbon monoxide dehydrogenase, small subunit, CoxS/CutS family [Energy production and conversion].	1	1	338	677	0.555774
224996	COG2085	COG2085	Predicted dinucleotide-binding enzyme [General function prediction only].	1	1	338	677	0.555774
225127	COG2217	ZntA	Cation transport ATPase [Inorganic ion transport and metabolism].	1	1	338	677	0.555774
225139	COG2230	Cfa	Cyclopropane fatty-acyl-phospholipid synthase and related methyltransferases [Lipid transport and metabolism].	1	1	338	677	0.555774
225228	COG2353	YceI	Polyisoprenoid-binding periplasmic protein YceI [General function prediction only].	1	1	338	677	0.555774
225459	COG2907	COG2907	Predicted NAD/FAD-binding protein [General function prediction only].	1	1	338	677	0.555774
225687	COG3145	AlkB	Alkylated DNA repair dioxygenase AlkB [Replication, recombination and repair].	1	1	338	677	0.555774
225723	COG3182	PiuB	Uncharacterized iron-regulated membrane protein [Function unknown].	1	1	338	677	0.555774
225755	COG3214	YcaQ	Uncharacterized conserved protein YcaQ, contains winged helix DNA-binding domain [General function prediction only].	1	1	338	677	0.555774
225921	COG3386	YvrE	Sugar lactone lactonase YvrE [Carbohydrate transport and metabolism].	1	1	338	677	0.555774
225922	COG3387	SGA1	Glucoamylase (glucan-1,4-alpha-glucosidase), GH15 family [Carbohydrate transport and metabolism].	1	1	338	677	0.555774
227278	COG4942	EnvC	Septal ring factor EnvC, activator of murein hydrolases AmiA and AmiB [Cell cycle control, cell division, chromosome partitioning].	1	1	338	677	0.555774
234599	PRK00052	PRK00052	prolipoprotein diacylglyceryl transferase; Reviewed	1	1	338	677	0.555774
234632	PRK00099	rplJ	50S ribosomal protein L10; Reviewed	1	1	338	677	0.555774
234668	PRK00150	def	peptide deformylase; Reviewed	1	1	338	677	0.555774
234671	PRK00157	rplL	50S ribosomal protein L7/L12; Reviewed	1	1	338	677	0.555774
234680	PRK00180	PRK00180	acetate kinase A/propionate kinase 2; Reviewed	1	1	338	677	0.555774
234692	PRK00222	PRK00222	methionine sulfoxide reductase B; Provisional	1	1	338	677	0.555774
234794	PRK00566	PRK00566	DNA-directed RNA polymerase subunit beta'; Provisional	1	1	338	677	0.555774
235401	PRK05306	infB	translation initiation factor IF-2; Validated	1	1	338	677	0.555774
235424	PRK05347	PRK05347	glutaminyl-tRNA synthetase; Provisional	1	1	338	677	0.555774
235537	PRK05632	PRK05632	phosphate acetyltransferase; Reviewed	1	1	338	677	0.555774
235546	PRK05653	fabG	3-ketoacyl-(acyl-carrier-protein) reductase; Validated	1	1	338	677	0.555774
235579	PRK05722	PRK05722	glucose-6-phosphate 1-dehydrogenase; Validated	1	1	338	677	0.555774
235940	PRK07115	PRK07115	AMP nucleosidase; Provisional	1	1	338	677	0.555774
235975	PRK07231	fabG	3-ketoacyl-(acyl-carrier-protein) reductase; Provisional	1	1	338	677	0.555774
236123	PRK07883	PRK07883	hypothetical protein; Validated	1	1	338	677	0.555774
236425	PRK09240	thiH	thiamine biosynthesis protein ThiH; Reviewed	1	1	338	677	0.555774
236515	PRK09435	PRK09435	membrane ATPase/protein kinase; Provisional	1	1	338	677	0.555774
236585	PRK09604	PRK09604	UGMP family protein; Validated	1	1	338	677	0.555774
236947	PRK11650	ugpC	glycerol-3-phosphate transporter ATP-binding subunit; Provisional	1	1	338	677	0.555774
237171	PRK12678	PRK12678	transcription termination factor Rho; Provisional	1	1	338	677	0.555774
237766	PRK14609	PRK14609	4-diphosphocytidyl-2-C-methyl-D-erythritol kinase; Provisional	1	1	338	677	0.555774
237951	PRK15347	PRK15347	two component system sensor kinase SsrA; Provisional	1	1	338	677	0.555774
238080	cd00136	PDZ	PDZ domain, also called DHR (Dlg homologous region) or GLGF (after a conserved sequence motif).	1	1	338	677	0.555774
238427	cd00831	CHS_like	Chalcone and stilbene synthases; plant-specific polyketide synthases (PKS) and related enzymes, also called type III PKSs.	1	1	338	677	0.555774
238694	cd01400	6PGL	6PGL: 6-Phosphogluconolactonase (6PGL) subfamily; 6PGL catalyzes the second step of the oxidative phase of the pentose phosphate pathway, the hydrolyzation of 6-phosphoglucono-1,5-lactone (delta form) to 6-phosphogluconate.	1	1	338	677	0.555774
238703	cd01412	SIRT5_Af1_CobB	SIRT5_Af1_CobB: Eukaryotic, archaeal and prokaryotic group (class3) which includes human sirtuin SIRT5, Archaeoglobus fulgidus Sir2-Af1, and E.	1	1	338	677	0.555774
239036	cd02121	PA_GCPII_like	PA_GCPII_like: Protease-associated domain containing protein, glutamate carboxypeptidase II (GCPII)-like.	1	1	338	677	0.555774
239230	cd02901	Macro_Poa1p_like	Macro domain, Poa1p_like family.	1	1	338	677	0.555774
239432	cd03316	MR_like	Mandelate racemase (MR)-like subfamily of the enolase superfamily.	1	1	338	677	0.555774
240612	cd12820	LbR_YadA-like	YadA-like, left-handed beta-roll.	1	1	338	677	0.555774
240659	cd12183	LDH_like_2	D-Lactate and related Dehydrogenases, NAD-binding and catalytic domains.	1	1	338	677	0.555774
269882	cd06596	GH31_CPE1046	Clostridium CPE1046-like.	1	1	338	677	0.555774
271213	cd14254	Dockerin_II	Type II dockerin repeat domain.	1	1	338	677	0.555774
275209	TIGR04416	group_II_RT_mat	group II intron reverse transcriptase/maturase.	1	1	338	677	0.555774
277323	cd00845	MPP_UshA_N_like	Escherichia coli UshA-like family, N-terminal metallophosphatase domain.	1	1	338	677	0.555774
284238	pfam06769	YoeB_toxin	YoeB-like toxin of bacterial type II toxin-antitoxin system.	1	1	338	677	0.555774
294412	cl00615	Membrane-FADS-like	N/A.	1	1	338	677	0.555774
308794	pfam03382	DUF285	Mycoplasma protein of unknown function, DUF285.	1	1	338	677	0.555774
309048	pfam03772	Competence	Competence protein.	1	1	338	677	0.555774
311682	pfam07843	DUF1634	Protein of unknown function (DUF1634).	1	1	338	677	0.555774
314353	pfam11387	DUF2795	Protein of unknown function (DUF2795).	1	1	338	677	0.555774
314685	pfam11855	DUF3375	Protein of unknown function (DUF3375).	1	1	338	677	0.555774
315929	pfam13364	BetaGal_dom4_5	Beta-galactosidase jelly roll domain.	1	1	338	677	0.555774
316923	pfam14440	XOO_2897-deam	Xanthomonas XOO_2897-like deaminase.	1	1	338	677	0.555774
316993	pfam14526	Cass2	Integron-associated effector binding protein.	1	1	338	677	0.555774
317925	pfam15610	PRTase_3	PRTase ComF-like.	1	1	338	677	0.555774
318494	pfam16265	DUF4918	Domain of unknown function (DUF4918).	1	1	338	677	0.555774
318794	pfam16656	Pur_ac_phosph_N	Purple acid Phosphatase, N-terminal domain.	1	1	338	677	0.555774
321109	cl00674	LUD_dom	LUD domain.	1	1	338	677	0.555774
321594	cl01628	DUF1919	Domain of unknown function (DUF1919).	1	1	338	677	0.555774
324589	cl10468	TerC	Integral membrane protein TerC family.	1	1	338	677	0.555774
326327	cl14606	Reeler_cohesin_like	Domains similar to the eukaryotic reeler domain and bacterial cohesins.	1	1	338	677	0.555774
328858	cl21700	Glyco_hydro_26	Glycosyl hydrolase family 26.	1	1	338	677	0.555774
332108	cl27287	GLF	UDP-galactopyranose mutase.	1	1	338	677	0.555774
332453	cl27632	Transposase_mut	Transposase, Mutator family.	1	1	338	677	0.555774
334480	pfam01300	Sua5_yciO_yrdC	Telomere recombination.	1	1	338	677	0.555774
334585	pfam01548	DEDD_Tnp_IS110	Transposase.	1	1	338	677	0.555774
334751	pfam01940	DUF92	Integral membrane protein DUF92.	1	1	338	677	0.555774
334855	pfam02230	Abhydrolase_2	Phospholipase/Carboxylesterase.	1	1	338	677	0.555774
334912	pfam02371	Transposase_20	Transposase IS116/IS110/IS902 family.	1	1	338	677	0.555774
335254	pfam03186	CobD_Cbib	CobD/Cbib protein.	1	1	338	677	0.555774
335313	pfam03403	PAF-AH_p_II	Platelet-activating factor acetylhydrolase, isoform II.	1	1	338	677	0.555774
335469	pfam03781	FGE-sulfatase	Sulfatase-modifying factor enzyme 1.	1	1	338	677	0.555774
335568	pfam03993	DUF349	Domain of Unknown Function (DUF349).	1	1	338	677	0.555774
335688	pfam04253	TFR_dimer	Transferrin receptor-like dimerization domain.	1	1	338	677	0.555774
335731	pfam04338	DUF481	Protein of unknown function, DUF481.	1	1	338	677	0.555774
336609	pfam07103	DUF1365	Protein of unknown function (DUF1365).	1	1	338	677	0.555774
336764	pfam07679	I-set	Immunoglobulin I-set domain.	1	1	338	677	0.555774
336972	pfam08244	Glyco_hydro_32C	Glycosyl hydrolases family 32 C terminal.	1	1	338	677	0.555774
337403	pfam09411	PagL	Lipid A 3-O-deacylase (PagL).	1	1	338	677	0.555774
337876	pfam10977	DUF2797	Protein of unknown function (DUF2797).	1	1	338	677	0.555774
338425	pfam12625	Arabinose_bd	Arabinose-binding domain of AraC transcription regulator, N-term.	1	1	338	677	0.555774
338717	pfam13391	HNH_2	HNH endonuclease.	1	1	338	677	0.555774
338741	pfam13437	HlyD_3	HlyD family secretion protein.	1	1	338	677	0.555774
338776	pfam13495	Phage_int_SAM_4	Phage integrase, N-terminal SAM-like domain.	1	1	338	677	0.555774
338817	pfam13557	Phenol_MetA_deg	Putative MetA-pathway of phenol degradation.	1	1	338	677	0.555774
338823	pfam13567	DUF4131	Domain of unknown function (DUF4131).	1	1	338	677	0.555774
338835	pfam13591	MerR_2	MerR HTH family regulatory protein.	1	1	338	677	0.555774
338838	pfam13596	PAS_10	PAS domain.	1	1	338	677	0.555774
339096	pfam14121	Porin_10	Putative porin.	1	1	338	677	0.555774
339124	pfam14224	DUF4331	Domain of unknown function (DUF4331).	1	1	338	677	0.555774
339156	pfam14302	DUF4377	Domain of unknown function (DUF4377).	1	1	338	677	0.555774
339167	pfam14321	DUF4382	Domain of unknown function (DUF4382).	1	1	338	677	0.555774
339221	pfam14417	MEDS	MEDS: MEthanogen/methylotroph, DcmR Sensory domain.	1	1	338	677	0.555774
339616	pfam16118	DUF4834	Domain of unknown function (DUF4834).	1	1	338	677	0.555774
340095	pfam17380	DUF5401	Family of unknown function (DUF5401).	1	1	338	677	0.555774
340815	cd16964	YqgF	putative pre-16S rRNA nuclease YqgF and RuvX family.	1	1	338	677	0.555774
340946	cd17388	MFS_TetA	Tetracycline resistance protein TetA and related proteins of the Major Facilitator Superfamily of transporters.	1	1	338	677	0.555774
349942	cd08022	M28_PSMA_like	M28 Zn-peptidase prostate-specific membrane antigen.	1	1	338	677	0.555774
350115	cd09001	GH43_FsAxh1-like	Glycosyl hydrolase family 43 such as Fibrobacter succinogenes subsp.	1	1	338	677	0.555774
350925	cl00160	LbetaH	N/A.	1	1	338	677	0.555774
350933	cl00179	AlgLyase	N/A.	1	1	338	677	0.555774
350988	cl00259	Sm_like	Sm and related proteins.	1	1	338	677	0.555774
351071	cl00391	beta_CA	N/A.	1	1	338	677	0.555774
353045	cl10019	PurM-like	N/A.	1	1	338	677	0.555774
353278	cl11493	PQQ_DH_like	PQQ-dependent dehydrogenases and related proteins.	1	1	338	677	0.555774
353328	cl11965	terB_like	tellurium resistance terB-like protein.	1	1	338	677	0.555774
354385	cl19123	lytB_ispH	4-hydroxy-3-methylbut-2-enyl diphosphate reductase.	1	1	338	677	0.555774
354428	cl19501	Mut7-C	Mut7-C RNAse domain.	1	1	338	677	0.555774
355462	cl25912	Bacuni_01323_like	Uncharacterized protein conserved in Bacteroidetes.	1	1	338	677	0.555774
355704	cl28089	TrkG	Trk-type K+ transport system, membrane component [Inorganic ion transport and metabolism].	1	1	338	677	0.555774
356796	cl29920	Chorismate_bind	chorismate binding enzyme.	1	1	338	677	0.555774
354370	cl18945	Beta_elim_lyase	Beta-eliminating lyase.	7	14	332	664	0.582637
226702	COG4251	COG4251	Bacteriophytochrome (light-regulated signal transduction histidine kinase) [Signal transduction mechanisms].	5	10	334	668	0.596999
274362	TIGR02956	TMAO_torS	TMAO reductase sytem sensor TorS.	5	10	334	668	0.596999
334238	pfam00754	F5_F8_type_C	F5/8 type C domain.	5	10	334	668	0.596999
336884	pfam07971	Glyco_hydro_92	Glycosyl hydrolase family 92.	5	10	334	668	0.596999
271185	cd01185	INTN1_C_like	Integrase IntN1 of Bacteroides mobilizable transposon NBU1 and similar proteins, C-terminal catalytic domain.	4	8	335	670	0.60787
275004	TIGR04131	Bac_Flav_CTERM	gliding motility-associated C-terminal domain.	4	8	335	670	0.60787
335537	pfam03929	PepSY_TM	PepSY-associated TM region.	4	8	335	670	0.60787
336760	pfam07660	STN	Secretin and TonB N-terminus short domain.	4	8	335	670	0.60787
222980	PHA03095	PHA03095	ankyrin-like protein; Provisional	3	6	336	672	0.623632
223616	COG0542	ClpA	ATP-dependent Clp protease ATP-binding subunit ClpA [Posttranslational modification, protein turnover, chaperones].	3	6	336	672	0.623632
224446	COG1529	CoxL	CO or xanthine dehydrogenase, Mo-binding subunit [Energy production and conversion].	3	6	336	672	0.623632
225002	COG2091	Sfp	Phosphopantetheinyl transferase [Coenzyme transport and metabolism].	3	6	336	672	0.623632
227721	COG5434	Pgu1	Polygalacturonase [Carbohydrate transport and metabolism].	3	6	336	672	0.623632
119397	cd06529	S24_LexA-like	Peptidase S24 LexA-like proteins are involved in the SOS response leading to the repair of single-stranded DNA within the bacterial cell.	2	4	337	674	0.649484
133022	cd04179	DPM_DPG-synthase_like	DPM_DPG-synthase_like is a member of the Glycosyltransferase 2 superfamily.	2	4	337	674	0.649484
182070	PRK09776	PRK09776	putative diguanylate cyclase; Provisional	2	4	337	674	0.649484
223492	COG0415	PhrB	Deoxyribodipyrimidine photolyase [Replication, recombination and repair].	2	4	337	674	0.649484
223656	COG0583	LysR	DNA-binding transcriptional regulator, LysR family [Transcription].	2	4	337	674	0.649484
223708	COG0635	HemN	Coproporphyrinogen III oxidase or related Fe-S oxidoreductase [Coenzyme transport and metabolism].	2	4	337	674	0.649484
224766	COG1853	RutF	NADH-FMN oxidoreductase RutF, flavin reductase (DIM6/NTAB) family [Energy production and conversion].	2	4	337	674	0.649484
225789	COG3250	LacZ	Beta-galactosidase/beta-glucuronidase [Carbohydrate transport and metabolism].	2	4	337	674	0.649484
234750	PRK00409	PRK00409	recombination and DNA strand exchange inhibitor protein; Reviewed	2	4	337	674	0.649484
236992	PRK11819	PRK11819	putative ABC transporter ATP-binding protein; Reviewed	2	4	337	674	0.649484
238207	cd00340	GSH_Peroxidase	Glutathione (GSH) peroxidase family; tetrameric selenoenzymes that catalyze the reduction of a variety of hydroperoxides including lipid peroxidases, using GSH as a specific electron donor substrate.	2	4	337	674	0.649484
273830	TIGR01845	outer_NodT	efflux transporter, outer membrane factor (OMF) lipoprotein, NodT family.	2	4	337	674	0.649484
274043	TIGR02225	recomb_XerD	tyrosine recombinase XerD.	2	4	337	674	0.649484
304997	cl23840	AGE	N/A.	2	4	337	674	0.649484
312754	pfam09357	RteC	RteC protein.	2	4	337	674	0.649484
333703	cl28883	PA	N/A.	2	4	337	674	0.649484
333718	cl28898	Peptidase_M48_M56	Peptidases M48 (Ste24 endopeptidase or htpX homolog) and M56 (in MecR1 and BlaR1), integral membrane metallopeptidases.	2	4	337	674	0.649484
334640	pfam01694	Rhomboid	Rhomboid family.	2	4	337	674	0.649484
337838	pfam10728	DUF2520	Domain of unknown function (DUF2520).	2	4	337	674	0.649484
338780	pfam13502	AsmA_2	AsmA-like C-terminal region.	2	4	337	674	0.649484
339148	pfam14292	SusE	SusE outer membrane protein.	2	4	337	674	0.649484
341285	cd17630	OSB_MenE-like	O-succinylbenzoic acid-CoA ligase.	2	4	337	674	0.649484
353040	cl10011	Periplasmic_Binding_Protein_Type_1	Type 1 periplasmic binding fold superfamily.	2	4	337	674	0.649484
353326	cl11961	ALDH-SF	NAD(P)+-dependent aldehyde dehydrogenase superfamily.	2	4	337	674	0.649484
355910	cl29034	AAT_I	N/A.	2	4	337	674	0.649484
336890	pfam07980	SusD_RagB	SusD family.	15	33	324	645	0.676294
227116	COG4775	BamA	Outer membrane protein assembly factor BamA [Cell wall/membrane/envelope biogenesis].	4	9	335	669	0.678941
339146	pfam14289	DUF4369	Domain of unknown function (DUF4369).	4	9	335	669	0.678941
224525	COG1609	PurR	DNA-binding transcriptional regulator, LacI/PurR family [Transcription].	8	18	331	660	0.681887
197918	smart00850	LytTR	LytTr DNA-binding domain.	3	7	336	671	0.702016
223739	COG0667	Tas	Predicted oxidoreductase (related to aryl-alcohol dehydrogenase) [General function prediction only].	3	7	336	671	0.702016
224748	COG1835	OafA	Peptidoglycan/LPS O-acetylase OafA/YrhL, contains acyltransferase and SGNH-hydrolase domains [Cell wall/membrane/envelope biogenesis].	3	7	336	671	0.702016
131739	TIGR02692	tRNA_CCA_actino	tRNA adenylyltransferase.	1	2	338	676	0.704141
143418	cd07100	ALDH_SSADH1_GabD1	Mycobacterium tuberculosis succinate-semialdehyde dehydrogenase 1-like.	1	2	338	676	0.704141
143471	cd07559	ALDH_ACDHII_AcoD-like	Ralstonia eutrophus NAD+-dependent acetaldehyde dehydrogenase II and Staphylococcus aureus AldA1 (SACOL0154)-like.	1	2	338	676	0.704141
153102	cd01043	DPS	DPS protein, ferritin-like diiron-binding domain.	1	2	338	676	0.704141
153246	cd07984	LPLAT_LABLAT-like	Lysophospholipid Acyltransferases (LPLATs) of Glycerophospholipid Biosynthesis: LABLAT-like.	1	2	338	676	0.704141
153418	cd07377	WHTH_GntR	Winged helix-turn-helix (WHTH) DNA-binding domain of the GntR family of transcriptional regulators.	1	2	338	676	0.704141
173831	cd00683	Trans_IPPS_HH	Trans-Isoprenyl Diphosphate Synthases, head-to-head.	1	2	338	676	0.704141
176103	cd08411	PBP2_OxyR	The C-terminal substrate-binding domain of the LysR-type transcriptional regulator OxyR, a member of the type 2 periplasmic binding fold protein superfamily.	1	2	338	676	0.704141
176459	cd03586	PolY_Pol_IV_kappa	DNA Polymerase IV/Kappa.	1	2	338	676	0.704141
178997	PRK00391	rpsR	30S ribosomal protein S18; Reviewed	1	2	338	676	0.704141
179197	PRK00982	acpP	acyl carrier protein; Provisional	1	2	338	676	0.704141
183173	PRK11519	PRK11519	tyrosine kinase; Provisional	1	2	338	676	0.704141
183395	PRK12275	PRK12275	hypothetical protein; Reviewed	1	2	338	676	0.704141
184041	PRK13413	mpi	multiple promoter invertase; Provisional	1	2	338	676	0.704141
187572	cd05262	SDR_a7	atypical (a) SDRs, subgroup 7.	1	2	338	676	0.704141
187627	cd05369	TER_DECR_SDR_a	Trans-2-enoyl-CoA reductase (TER) and 2,4-dienoyl-CoA reductase (DECR), atypical (a) SDR.	1	2	338	676	0.704141
188247	TIGR02795	tol_pal_ybgF	tol-pal system protein YbgF.	1	2	338	676	0.704141
223324	COG0246	MtlD	Mannitol-1-phosphate/altronate dehydrogenases [Carbohydrate transport and metabolism].	1	2	338	676	0.704141
223394	COG0317	SpoT	(p)ppGpp synthase/hydrolase, HD superfamily [Signal transduction mechanisms, Transcription].	1	2	338	676	0.704141
223532	COG0456	RimI	Ribosomal protein S18 acetylase RimI and related acetyltransferases [Translation, ribosomal structure and biogenesis].	1	2	338	676	0.704141
224062	COG1139	LutB	L-lactate utilization protein LutB, contains a ferredoxin-type domain [Energy production and conversion].	1	2	338	676	0.704141
224154	COG1233	COG1233	Phytoene dehydrogenase-related protein [Secondary metabolites biosynthesis, transport and catabolism].	1	2	338	676	0.704141
224196	COG1277	NosY	ABC-type transport system involved in multi-copper enzyme maturation, permease component [Posttranslational modification, protein turnover, chaperones].	1	2	338	676	0.704141
224397	COG1480	YqfF	Membrane-associated HD superfamily phosphohydrolase [General function prediction only].	1	2	338	676	0.704141
224490	COG1574	YtcJ	Predicted amidohydrolase YtcJ [General function prediction only].	1	2	338	676	0.704141
224509	COG1593	DctQ	TRAP-type C4-dicarboxylate transport system, large permease component [Carbohydrate transport and metabolism].	1	2	338	676	0.704141
224961	COG2050	PaaI	Acyl-coenzyme A thioesterase PaaI, contains HGG motif [Secondary metabolites biosynthesis, transport and catabolism].	1	2	338	676	0.704141
225201	COG2319	WD40	WD40 repeat [General function prediction only].	1	2	338	676	0.704141
225420	COG2865	COG2865	Predicted transcriptional regulator, contains HTH domain [Transcription].	1	2	338	676	0.704141
226297	COG3774	OCH1	Mannosyltransferase OCH1 or related enzyme [Cell wall/membrane/envelope biogenesis].	1	2	338	676	0.704141
226444	COG3934	COG3934	Endo-1,4-beta-mannosidase [Carbohydrate transport and metabolism].	1	2	338	676	0.704141
227020	COG4675	MdpB	Microcystin-dependent protein (function unknown) [Function unknown].	1	2	338	676	0.704141
227095	COG4753	YesN	Two-component response regulator, YesN/AraC family, consists of REC and AraC-type DNA-binding domains [Signal transduction mechanisms, Transcription].	1	2	338	676	0.704141
234564	PRK00001	rplC	50S ribosomal protein L3; Validated	1	2	338	676	0.704141
234642	PRK00112	tgt	queuine tRNA-ribosyltransferase; Provisional	1	2	338	676	0.704141
234659	PRK00137	rplI	50S ribosomal protein L9; Reviewed	1	2	338	676	0.704141
234687	PRK00208	thiG	thiazole synthase; Reviewed	1	2	338	676	0.704141
234779	PRK00485	fumC	fumarate hydratase; Reviewed	1	2	338	676	0.704141
234804	PRK00629	pheT	phenylalanyl-tRNA synthetase subunit beta; Reviewed	1	2	338	676	0.704141
235374	PRK05250	PRK05250	S-adenosylmethionine synthetase; Validated	1	2	338	676	0.704141
235396	PRK05299	rpsB	30S ribosomal protein S2; Provisional	1	2	338	676	0.704141
235404	PRK05319	rplD	50S ribosomal protein L4; Provisional	1	2	338	676	0.704141
235645	PRK05912	PRK05912	tyrosyl-tRNA synthetase; Validated	1	2	338	676	0.704141
236410	PRK09202	nusA	transcription elongation factor NusA; Validated	1	2	338	676	0.704141
236439	PRK09267	PRK09267	flavodoxin FldA; Validated	1	2	338	676	0.704141
236698	PRK10475	PRK10475	23S rRNA pseudouridine synthase F; Provisional	1	2	338	676	0.704141
236780	PRK10867	PRK10867	signal recognition particle protein; Provisional	1	2	338	676	0.704141
236963	PRK11720	PRK11720	galactose-1-phosphate uridylyltransferase; Provisional	1	2	338	676	0.704141
238317	cd00564	TMP_TenI	Thiamine monophosphate synthase (TMP synthase)/TenI.	1	2	338	676	0.704141
238509	cd01038	Endonuclease_DUF559	Domain of unknown function, appears to be related to a diverse group of endonucleases.	1	2	338	676	0.704141
238576	cd01171	YXKO-related	B.	1	2	338	676	0.704141
238836	cd01673	dNK	Deoxyribonucleoside kinase (dNK) catalyzes the phosphorylation of deoxyribonucleosides to yield corresponding monophosphates (dNMPs).	1	2	338	676	0.704141
239267	cd02969	PRX_like1	Peroxiredoxin (PRX)-like 1 family; hypothetical proteins that show sequence similarity to PRXs.	1	2	338	676	0.704141
239492	cd03398	PAP2_haloperoxidase	PAP2, haloperoxidase_like subfamily.	1	2	338	676	0.704141
260003	cd07182	RNase_HII_bacteria_HII_like	Bacterial Ribonuclease HII-like.	1	2	338	676	0.704141
269877	cd06591	GH31_xylosidase_XylS	xylosidase XylS-like.	1	2	338	676	0.704141
273361	TIGR00955	3a01204	The Eye Pigment Precursor Transporter (EPP) Family protein.	1	2	338	676	0.704141
273802	TIGR01779	TonB-B12	TonB-dependent vitamin B12 receptor.	1	2	338	676	0.704141
274229	TIGR02608	delta_60_rpt	delta-60 repeat domain.	1	2	338	676	0.704141
274273	TIGR02734	crtI_fam	phytoene desaturase.	1	2	338	676	0.704141
274473	TIGR03182	PDH_E1_alph_y	pyruvate dehydrogenase E1 component, alpha subunit.	1	2	338	676	0.704141
274650	TIGR03562	osmo_induc_OsmC	peroxiredoxin, OsmC subfamily.	1	2	338	676	0.704141
274851	TIGR03915	SAM_7_link_chp	probable DNA metabolism protein.	1	2	338	676	0.704141
279569	pfam01244	Peptidase_M19	Membrane dipeptidase (Peptidase family M19).	1	2	338	676	0.704141
299145	cl10015	YjgF_YER057c_UK114_family	N/A.	1	2	338	676	0.704141
302653	cl17685	Phytase	Phytase.	1	2	338	676	0.704141
305000	cl23843	DUF839	Bacterial protein of unknown function (DUF839).	1	2	338	676	0.704141
306846	pfam00425	Chorismate_bind	chorismate binding enzyme.	1	2	338	676	0.704141
310575	pfam06078	DUF937	Bacterial protein of unknown function (DUF937).	1	2	338	676	0.704141
311531	pfam07632	DUF1593	Protein of unknown function (DUF1593).	1	2	338	676	0.704141
315498	pfam12831	FAD_oxidored	FAD dependent oxidoreductase.	1	2	338	676	0.704141
315868	pfam13290	CHB_HEX_C_1	Chitobiase/beta-hexosaminidase C-terminal domain.	1	2	338	676	0.704141
318587	pfam16400	DUF5008	Domain of unknown function (DUF5008).	1	2	338	676	0.704141
321194	cl00824	HEPN	HEPN domain.	1	2	338	676	0.704141
327514	cl19188	PL-6	Polysaccharide Lyase Family 6.	1	2	338	676	0.704141
334200	pfam00665	rve	Integrase core domain.	1	2	338	676	0.704141
334961	pfam02537	CRCB	CrcB-like protein, Camphor Resistance (CrcB).	1	2	338	676	0.704141
334990	pfam02592	Vut_1	Putative vitamin uptake transporter.	1	2	338	676	0.704141
335689	pfam04255	DUF433	Protein of unknown function (DUF433).	1	2	338	676	0.704141
336008	pfam05089	NAGLU	Alpha-N-acetylglucosaminidase (NAGLU) tim-barrel domain.	1	2	338	676	0.704141
336010	pfam05096	Glu_cyclase_2	Glutamine cyclotransferase.	1	2	338	676	0.704141
336154	pfam05610	DUF779	Protein of unknown function (DUF779).	1	2	338	676	0.704141
336840	pfam07859	Abhydrolase_3	alpha/beta hydrolase fold.	1	2	338	676	0.704141
337454	pfam09603	Fib_succ_major	Fibrobacter succinogenes major domain (Fib_succ_major).	1	2	338	676	0.704141
338090	pfam11750	DUF3307	Protein of unknown function (DUF3307).	1	2	338	676	0.704141
338449	pfam12697	Abhydrolase_6	Alpha/beta hydrolase family.	1	2	338	676	0.704141
338568	pfam12971	NAGLU_N	Alpha-N-acetylglucosaminidase (NAGLU) N-terminal domain.	1	2	338	676	0.704141
338569	pfam12972	NAGLU_C	Alpha-N-acetylglucosaminidase (NAGLU) C-terminal domain.	1	2	338	676	0.704141
338638	pfam13231	PMT_2	Dolichyl-phosphate-mannose-protein mannosyltransferase.	1	2	338	676	0.704141
338689	pfam13342	Toprim_Crpt	C-terminal repeat of topoisomerase.	1	2	338	676	0.704141
338849	pfam13612	DDE_Tnp_1_3	Transposase DDE domain.	1	2	338	676	0.704141
339152	pfam14298	DUF4374	Domain of unknown function (DUF4374).	1	2	338	676	0.704141
340817	cd03784	GT1_Gtf-like	UDP-glycosyltransferases and similar proteins.	1	2	338	676	0.704141
349772	cd05387	BY-kinase	bacterial tyrosine-kinase.	1	2	338	676	0.704141
349970	cd18097	SpoU-like	SAM-dependent rRNA or tRNA methylase related to SpoU.	1	2	338	676	0.704141
350769	cd18011	DEXDc_RapA	DEXH-box helicase domain of RapA.	1	2	338	676	0.704141
351104	cl00467	Ntn_hydrolase	N/A.	1	2	338	676	0.704141
353010	cl09821	Fib_succ_major	Fibrobacter succinogenes major domain (Fib_succ_major).	1	2	338	676	0.704141
354398	cl19237	DUF45	Protein of unknown function DUF45.	1	2	338	676	0.704141
355709	cl28330	XerC	Integrase [Replication, recombination and repair, Mobilome: prophages, transposons].	1	2	338	676	0.704141
355773	cl28889	CA_like	Cadherin repeat-like domain.	1	2	338	676	0.704141
272971	TIGR00229	sensory_box	PAS domain S-box.	5	12	334	666	0.720551
274376	TIGR02985	Sig70_bacteroi1	RNA polymerase sigma-70 factor, Bacteroides expansion family 1.	12	28	327	650	0.73095
223638	COG0564	RluA	Pseudouridylate synthase, 23S rRNA- or tRNA-specific [Translation, ribosomal structure and biogenesis].	2	5	337	673	0.737535
223864	COG0793	CtpA	C-terminal processing protease CtpA/Prc, contains a PDZ domain [Posttranslational modification, protein turnover, chaperones].	2	5	337	673	0.737535
224870	COG1959	IscR	DNA-binding transcriptional regulator, IscR family [Transcription].	2	5	337	673	0.737535
225006	COG2095	MarC	Small neutral amino acid transporter SnatA, MarC family [Amino acid transport and metabolism].	2	5	337	673	0.737535
227277	COG4941	COG4941	Predicted RNA polymerase sigma factor, contains C-terminal TPR domain [Transcription].	2	5	337	673	0.737535
234723	PRK00311	panB	3-methyl-2-oxobutanoate hydroxymethyltransferase; Reviewed	2	5	337	673	0.737535
235513	PRK05579	PRK05579	bifunctional phosphopantothenoylcysteine decarboxylase/phosphopantothenate synthase; Validated	2	5	337	673	0.737535
273730	TIGR01646	vgr_GE	Rhs element Vgr protein.	2	5	337	673	0.737535
274625	TIGR03519	T9SS_PorP_fam	type IX secretion system membrane protein, PorP/SprF family.	2	5	337	673	0.737535
314659	pfam11827	DUF3347	Protein of unknown function (DUF3347).	2	5	337	673	0.737535
315880	pfam13304	AAA_21	AAA domain, putative AbiEii toxin, Type IV TA system.	2	5	337	673	0.737535
318366	pfam16119	DUF4835	Domain of unknown function (DUF4835).	2	5	337	673	0.737535
334601	pfam01590	GAF	GAF domain.	2	5	337	673	0.737535
335993	pfam05036	SPOR	Sporulation related domain.	2	5	337	673	0.737535
337761	pfam10459	Peptidase_S46	Peptidase S46.	2	5	337	673	0.737535
337975	pfam11306	DUF3108	Protein of unknown function (DUF3108).	2	5	337	673	0.737535
338467	pfam12728	HTH_17	Helix-turn-helix domain.	2	5	337	673	0.737535
339269	pfam14542	Acetyltransf_CG	GCN5-related N-acetyl-transferase.	2	5	337	673	0.737535
182528	PRK10535	PRK10535	macrolide transporter ATP-binding /permease protein; Provisional	4	10	335	668	0.740505
340952	cd17394	MFS_FucP_like	Fucose permease and similar proteins of the Major Facilitator Superfamily of transporters.	4	10	335	668	0.740505
354811	cl21454	NADB_Rossmann	Rossmann-fold NAD(P)(+)-binding proteins.	4	10	335	668	0.740505
354837	cl21495	Acyl_transf_3	Acyltransferase family.	4	10	335	668	0.740505
212491	cd05233	SDR_c	classical (c) SDRs.	3	8	336	670	0.767304
224523	COG1607	YciA	Acyl-CoA hydrolase [Lipid transport and metabolism].	3	8	336	670	0.767304
225186	COG2303	BetA	Choline dehydrogenase or related flavoprotein [Lipid transport and metabolism, General function prediction only].	3	8	336	670	0.767304
328775	cl21527	DoxX	DoxX.	3	8	336	670	0.767304
335300	pfam03358	FMN_red	NADPH-dependent FMN reductase.	3	8	336	670	0.767304
337058	pfam08447	PAS_3	PAS fold.	3	8	336	670	0.767304
316141	pfam13585	CHU_C	C-terminal domain of CHU protein family.	11	27	328	651	0.7738
224455	COG1538	TolC	Outer membrane protein TolC [Cell wall/membrane/envelope biogenesis].	12	30	327	648	0.796747
129794	TIGR00711	efflux_EmrB	drug resistance transporter, EmrB/QacA subfamily.	1	3	338	675	0.803053
133003	cd02509	GDP-M1P_Guanylyltransferase	GDP-M1P_Guanylyltransferase catalyzes the formation of GDP-Mannose.	1	3	338	675	0.803053
143598	cd07574	nitrilase_Rim1_like	Uncharacterized subgroup of the nitrilase superfamily; some members of this subgroup have an N-terminal RimI domain (class 12 nitrilases).	1	3	338	675	0.803053
176860	cd07818	SRPBCC_1	Ligand-binding SRPBCC domain of an uncharacterized subfamily of proteins.	1	3	338	675	0.803053
178888	PRK00132	rpsI	30S ribosomal protein S9; Reviewed	1	3	338	675	0.803053
181382	PRK08317	PRK08317	hypothetical protein; Provisional	1	3	338	675	0.803053
181703	PRK09216	rplM	50S ribosomal protein L13; Reviewed	1	3	338	675	0.803053
182232	PRK10089	PRK10089	tRNA-binding protein; Provisional	1	3	338	675	0.803053
185268	PRK15370	PRK15370	E3 ubiquitin-protein ligase SlrP; Provisional	1	3	338	675	0.803053
223363	COG0286	HsdM	Type I restriction-modification system, DNA methylase subunit [Defense mechanisms].	1	3	338	675	0.803053
223472	COG0395	UgpE	ABC-type glycerol-3-phosphate transport system, permease component [Carbohydrate transport and metabolism].	1	3	338	675	0.803053
223545	COG0469	PykF	Pyruvate kinase [Carbohydrate transport and metabolism].	1	3	338	675	0.803053
223713	COG0640	ArsR	DNA-binding transcriptional regulator, ArsR family [Transcription].	1	3	338	675	0.803053
223970	COG1040	ComFC	Predicted amidophosphoribosyltransferases [General function prediction only].	1	3	338	675	0.803053
224045	COG1120	FepC	ABC-type cobalamin/Fe3+-siderophores transport system, ATPase component [Inorganic ion transport and metabolism, Coenzyme transport and metabolism].	1	3	338	675	0.803053
224096	COG1175	UgpA	ABC-type sugar transport system, permease component [Carbohydrate transport and metabolism].	1	3	338	675	0.803053
224197	COG1278	CspC	Cold shock protein, CspA family [Transcription].	1	3	338	675	0.803053
224759	COG1846	MarR	DNA-binding transcriptional regulator, MarR family [Transcription].	1	3	338	675	0.803053
224771	COG1858	MauG	Cytochrome c peroxidase [Posttranslational modification, protein turnover, chaperones].	1	3	338	675	0.803053
225803	COG3264	MscK	Small-conductance mechanosensitive channel [Cell wall/membrane/envelope biogenesis].	1	3	338	675	0.803053
234579	PRK00023	cmk	cytidylate kinase; Provisional	1	3	338	675	0.803053
234587	PRK00039	ruvC	Holliday junction resolvase; Reviewed	1	3	338	675	0.803053
234705	PRK00260	cysS	cysteinyl-tRNA synthetase; Validated	1	3	338	675	0.803053
234742	PRK00389	gcvT	glycine cleavage system aminomethyltransferase T; Reviewed	1	3	338	675	0.803053
234788	PRK00529	PRK00529	elongation factor P; Validated	1	3	338	675	0.803053
235444	PRK05399	PRK05399	DNA mismatch repair protein MutS; Provisional	1	3	338	675	0.803053
235493	PRK05481	PRK05481	lipoyl synthase; Provisional	1	3	338	675	0.803053
235586	PRK05738	rplW	50S ribosomal protein L23; Reviewed	1	3	338	675	0.803053
235596	PRK05764	PRK05764	aspartate aminotransferase; Provisional	1	3	338	675	0.803053
235798	PRK06416	PRK06416	dihydrolipoamide dehydrogenase; Reviewed	1	3	338	675	0.803053
236078	PRK07726	PRK07726	DNA topoisomerase III; Provisional	1	3	338	675	0.803053
236453	PRK09287	PRK09287	6-phosphogluconate dehydrogenase; Validated	1	3	338	675	0.803053
236488	PRK09374	rplB	50S ribosomal protein L2; Validated	1	3	338	675	0.803053
236548	PRK09525	lacZ	beta-D-galactosidase; Reviewed	1	3	338	675	0.803053
236686	PRK10416	PRK10416	signal recognition particle-docking protein FtsY; Provisional	1	3	338	675	0.803053
237084	PRK12378	PRK12378	hypothetical protein; Provisional	1	3	338	675	0.803053
238141	cd00229	SGNH_hydrolase	SGNH_hydrolase, or GDSL_hydrolase, is a diverse family of lipases and esterases.	1	3	338	675	0.803053
238572	cd01167	bac_FRK	Fructokinases (FRKs) mainly from bacteria and plants are enzymes with high specificity for fructose, as are all FRKs, but they catalyzes the conversion of fructose to fructose-6-phosphate, which is an entry point into glycolysis via conversion into glucose-6-phosphate.	1	3	338	675	0.803053
239527	cd03443	PaaI_thioesterase	PaaI_thioesterase is a tetrameric acyl-CoA thioesterase with a hot dog fold and one of several proteins responsible for phenylacetic acid (PA) degradation in bacteria.	1	3	338	675	0.803053
273597	TIGR01394	TypA_BipA	GTP-binding protein TypA/BipA.	1	3	338	675	0.803053
284351	pfam06902	Fer4_19	Divergent 4Fe-4S mono-cluster.	1	3	338	675	0.803053
308144	pfam02368	Big_2	Bacterial Ig-like domain (group 2).	1	3	338	675	0.803053
313283	pfam10029	DUF2271	Predicted periplasmic protein (DUF2271).	1	3	338	675	0.803053
314227	pfam11236	DUF3037	Protein of unknown function (DUF3037).	1	3	338	675	0.803053
315865	pfam13287	Fn3_assoc	Fn3 associated.	1	3	338	675	0.803053
316166	pfam13616	Rotamase_3	PPIC-type PPIASE domain.	1	3	338	675	0.803053
316750	pfam14257	DUF4349	Domain of unknown function (DUF4349).	1	3	338	675	0.803053
318539	pfam16334	DUF4964	Domain of unknown function (DUF4964).	1	3	338	675	0.803053
319186	pfam17168	DUF5127	Domain of unknown function (DUF5127).	1	3	338	675	0.803053
333860	pfam00126	HTH_1	Bacterial regulatory helix-turn-helix protein, lysR family.	1	3	338	675	0.803053
333887	pfam00160	Pro_isomerase	Cyclophilin type peptidyl-prolyl cis-trans isomerase/CLD.	1	3	338	675	0.803053
333964	pfam00258	Flavodoxin_1	Flavodoxin.	1	3	338	675	0.803053
334012	pfam00331	Glyco_hydro_10	Glycosyl hydrolase family 10.	1	3	338	675	0.803053
334197	pfam00656	Peptidase_C14	Caspase domain.	1	3	338	675	0.803053
334355	pfam01032	FecCD	FecCD transport family.	1	3	338	675	0.803053
334647	pfam01713	Smr	Smr domain.	1	3	338	675	0.803053
334683	pfam01790	LGT	Prolipoprotein diacylglyceryl transferase.	1	3	338	675	0.803053
334894	pfam02322	Cyt_bd_oxida_II	Cytochrome bd terminal oxidase subunit II.	1	3	338	675	0.803053
334901	pfam02342	TerD	TerD domain.	1	3	338	675	0.803053
335006	pfam02614	UxaC	Glucuronate isomerase.	1	3	338	675	0.803053
335290	pfam03321	GH3	GH3 auxin-responsive promoter.	1	3	338	675	0.803053
335713	pfam04306	DUF456	Protein of unknown function (DUF456).	1	3	338	675	0.803053
337188	pfam08760	DUF1793	Domain of unknown function (DUF1793).	1	3	338	675	0.803053
338225	pfam12040	DUF3526	Domain of unknown function (DUF3526).	1	3	338	675	0.803053
338518	pfam12844	HTH_19	Helix-turn-helix domain.	1	3	338	675	0.803053
338696	pfam13354	Beta-lactamase2	Beta-lactamase enzyme family.	1	3	338	675	0.803053
338856	pfam13623	SurA_N_2	SurA N-terminal domain.	1	3	338	675	0.803053
339101	pfam14128	DUF4295	Domain of unknown function (DUF4295).	1	3	338	675	0.803053
339150	pfam14294	DUF4372	Domain of unknown function (DUF4372).	1	3	338	675	0.803053
339695	pfam16326	ABC_tran_CTD	ABC transporter C-terminal domain.	1	3	338	675	0.803053
339700	pfam16335	DUF4965	Domain of unknown function (DUF4965).	1	3	338	675	0.803053
340825	cd03794	GT4_WbuB-like	Escherichia coli WbuB and similar proteins.	1	3	338	675	0.803053
340856	cd04950	GT4_TuaH-like	teichuronic acid biosynthesis glycosyltransferase TuaH and similar proteins.	1	3	338	675	0.803053
350908	cl00120	PP2Cc	N/A.	1	3	338	675	0.803053
350986	cl00257	HU_IHF	DNA sequence specific (IHF) and non-specific (HU) domains.	1	3	338	675	0.803053
355575	cl26817	GSDH	Glucose / Sorbosone dehydrogenase.	1	3	338	675	0.803053
334159	pfam00583	Acetyltransf_1	Acetyltransferase (GNAT) family.	11	28	328	650	0.80539
119333	cd06563	GH20_chitobiase-like	The chitobiase of Serratia marcescens is a beta-N-1,4-acetylhexosaminidase with a glycosyl hydrolase family 20 (GH20) domain that hydrolyzes the beta-1,4-glycosidic linkages in oligomers derived from chitin.	2	6	337	672	0.805986
119339	cd06558	crotonase-like	Crotonase/Enoyl-Coenzyme A (CoA) hydratase superfamily.	2	6	337	672	0.805986
176862	cd07820	SRPBCC_3	Ligand-binding SRPBCC domain of an uncharacterized subfamily of proteins.	2	6	337	672	0.805986
185693	cd08023	GH16_laminarinase_like	Laminarinase, member of the glycosyl hydrolase family 16.	2	6	337	672	0.805986
223131	COG0053	FieF	Divalent metal cation (Fe/Co/Zn/Cd) transporter [Inorganic ion transport and metabolism].	2	6	337	672	0.805986
223678	COG0605	SodA	Superoxide dismutase [Inorganic ion transport and metabolism].	2	6	337	672	0.805986
234655	PRK00133	metG	methionyl-tRNA synthetase; Reviewed	2	6	337	672	0.805986
236472	PRK09347	folE	GTP cyclohydrolase I; Provisional	2	6	337	672	0.805986
334608	pfam01609	DDE_Tnp_1	Transposase DDE domain.	2	6	337	672	0.805986
336847	pfam07883	Cupin_2	Cupin domain.	2	6	337	672	0.805986
238088	cd00156	REC	Signal receiver domain; originally thought to be unique to bacteria (CheY, OmpR, NtrC, and PhoB), now recently identified in eukaroytes ETR1 Arabidopsis thaliana; this domain receives the signal from the sensor partner in a two-component systems; contains a phosphoacceptor site that is phosphorylated by histidine kinase homologs; usually found N-terminal to a DNA binding effector domain; forms ho…	22	53	317	625	0.812772
236848	PRK11107	PRK11107	hybrid sensory histidine kinase BarA; Provisional	3	9	336	669	0.820448
223745	COG0673	MviM	Predicted dehydrogenase [General function prediction only].	9	24	330	654	0.825369
185760	cd08977	SusD	starch binding outer membrane protein SusD.	15	38	324	640	0.827977
353818	cl14643	SRPBCC	START/RHO_alpha_C/PITP/Bet_v1/CoxG/CalC (SRPBCC) ligand-binding domain superfamily.	4	12	335	666	0.836111
274948	TIGR04056	OMP_RagA_SusC	TonB-linked outer membrane protein, SusC/RagA family.	51	118	288	560	0.851547
223685	COG0612	PqqL	Predicted Zn-dependent peptidase [General function prediction only].	2	7	337	671	0.858087
236475	PRK09352	PRK09352	3-oxoacyl-(acyl carrier protein) synthase III; Reviewed	2	7	337	671	0.858087
315878	pfam13302	Acetyltransf_3	Acetyltransferase (GNAT) domain.	2	7	337	671	0.858087
336353	pfam06250	DUF1016	Protein of unknown function (DUF1016).	2	7	337	671	0.858087
341066	cd09603	M1_APN_like	Peptidase M1 family similar to aminopeptidase N catalytic domain.	2	7	337	671	0.858087
223730	COG0657	Aes	Acetyl esterase/lipase [Lipid transport and metabolism].	3	10	336	668	0.862901
321296	cl00999	YCII	YCII-related domain.	3	10	336	668	0.862901
100006	cd02199	YjgF_YER057c_UK114_like_1	This group of proteins belong to a large family of YjgF/YER057c/UK114-like proteins present in bacteria, archaea, and eukaryotes with no definitive function.	1	4	338	674	0.868961
130902	TIGR01843	type_I_hlyD	type I secretion membrane fusion protein, HlyD family.	1	4	338	674	0.868961
212158	cd11613	SAF_AH_GD	Domains similar to fish antifreeze type III protein.	1	4	338	674	0.868961
215347	PLN02644	PLN02644	acetyl-CoA C-acetyltransferase	1	4	338	674	0.868961
223231	COG0153	GalK	Galactokinase [Carbohydrate transport and metabolism].	1	4	338	674	0.868961
223234	COG0156	BioF	7-keto-8-aminopelargonate synthetase or related enzyme [Coenzyme transport and metabolism].	1	4	338	674	0.868961
223325	COG0247	GlpC	Fe-S oxidoreductase [Energy production and conversion].	1	4	338	674	0.868961
223699	COG0626	MetC	Cystathionine beta-lyase/cystathionine gamma-synthase [Amino acid transport and metabolism].	1	4	338	674	0.868961
223769	COG0697	RhaT	Permease of the drug/metabolite transporter (DMT) superfamily [Carbohydrate transport and metabolism, Amino acid transport and metabolism, General function prediction only].	1	4	338	674	0.868961
223855	COG0784	CheY	CheY chemotaxis protein or a CheY-like REC (receiver) domain [Signal transduction mechanisms].	1	4	338	674	0.868961
223975	COG1045	CysE	Serine acetyltransferase [Amino acid transport and metabolism].	1	4	338	674	0.868961
224136	COG1215	BcsA	Glycosyltransferase, catalytic subunit of cellulose synthase and poly-beta-1,6-N-acetylglucosamine synthase [Cell motility].	1	4	338	674	0.868961
224170	COG1250	FadB	3-hydroxyacyl-CoA dehydrogenase [Lipid transport and metabolism].	1	4	338	674	0.868961
224238	COG1319	CoxM	CO or xanthine dehydrogenase, FAD-binding subunit [Energy production and conversion].	1	4	338	674	0.868961
224268	COG1349	GlpR	DNA-binding transcriptional regulator of sugar metabolism, DeoR/GlpR family [Transcription, Carbohydrate transport and metabolism].	1	4	338	674	0.868961
224482	COG1566	EmrA	Multidrug resistance efflux pump [Defense mechanisms].	1	4	338	674	0.868961
224609	COG1695	PadR	DNA-binding transcriptional regulator, PadR family [Transcription].	1	4	338	674	0.868961
225183	COG2274	SunT	ABC-type bacteriocin/lantibiotic exporters, contain an N-terminal double-glycine peptidase domain [Defense mechanisms].	1	4	338	674	0.868961
226477	COG3968	GlnA3	Glutamine synthetase type III [Amino acid transport and metabolism].	1	4	338	674	0.868961
234734	PRK00349	uvrA	excinuclease ABC subunit A; Reviewed	1	4	338	674	0.868961
234918	PRK01202	PRK01202	glycine cleavage system protein H; Provisional	1	4	338	674	0.868961
234947	PRK01362	PRK01362	putative translaldolase; Provisional	1	4	338	674	0.868961
235147	PRK03643	PRK03643	altronate oxidoreductase; Provisional	1	4	338	674	0.868961
235221	PRK04123	PRK04123	ribulokinase; Provisional	1	4	338	674	0.868961
235272	PRK04296	PRK04296	thymidine kinase; Provisional	1	4	338	674	0.868961
235422	PRK05342	clpX	ATP-dependent protease ATP-binding subunit ClpX; Provisional	1	4	338	674	0.868961
235551	PRK05667	dnaG	DNA primase; Validated	1	4	338	674	0.868961
235816	PRK06500	PRK06500	short chain dehydrogenase; Provisional	1	4	338	674	0.868961
236450	PRK09283	PRK09283	delta-aminolevulinic acid dehydratase; Validated	1	4	338	674	0.868961
236491	PRK09377	tsf	elongation factor Ts; Provisional	1	4	338	674	0.868961
236901	PRK11360	PRK11360	sensory histidine kinase AtoS; Provisional	1	4	338	674	0.868961
236995	PRK11824	PRK11824	polynucleotide phosphorylase/polyadenylase; Provisional	1	4	338	674	0.868961
238126	cd00207	fer2	2Fe-2S iron-sulfur cluster binding domain.	1	4	338	674	0.868961
268208	cl19855	DUF1501	Protein of unknown function (DUF1501).	1	4	338	674	0.868961
271269	cd08916	TrHb3_P	Truncated hemoglobins (TrHbs, 2/2Hb, 2/2 globins); group 3 (P).	1	4	338	674	0.868961
272993	TIGR00276	TIGR00276	epoxyqueuosine reductase.	1	4	338	674	0.868961
273453	TIGR01125	TIGR01125	ribosomal protein S12 methylthiotransferase RimO.	1	4	338	674	0.868961
274008	TIGR02168	SMC_prok_B	chromosome segregation protein SMC, common bacterial type.	1	4	338	674	0.868961
274024	TIGR02191	RNaseIII	ribonuclease III, bacterial.	1	4	338	674	0.868961
274398	TIGR03025	EPS_sugtrans	exopolysaccharide biosynthesis polyprenyl glycosylphosphotransferase.	1	4	338	674	0.868961
274452	TIGR03150	fabF	beta-ketoacyl-acyl-carrier-protein synthase II.	1	4	338	674	0.868961
309008	pfam03724	META	META domain.	1	4	338	674	0.868961
309481	pfam04357	TamB	TamB, inner membrane protein subunit of TAM complex.	1	4	338	674	0.868961
315447	pfam12770	CHAT	CHAT domain.	1	4	338	674	0.868961
318496	pfam16267	DUF4920	Domain of unknown function (DUF4920).	1	4	338	674	0.868961
334391	pfam01120	Alpha_L_fucos	Alpha-L-fucosidase.	1	4	338	674	0.868961
334473	pfam01288	HPPK	7,8-dihydro-6-hydroxymethylpterin-pyrophosphokinase (HPPK).	1	4	338	674	0.868961
334627	pfam01654	Cyt_bd_oxida_I	Cytochrome bd terminal oxidase subunit I.	1	4	338	674	0.868961
335707	pfam04295	GD_AH_C	D-galactarate dehydratase / Altronate hydrolase, C-terminus.	1	4	338	674	0.868961
336258	pfam05960	DUF885	Bacterial protein of unknown function (DUF885).	1	4	338	674	0.868961
337214	pfam08811	DUF1800	Protein of unknown function (DUF1800).	1	4	338	674	0.868961
337385	pfam09365	DUF2461	Conserved hypothetical protein (DUF2461).	1	4	338	674	0.868961
337476	pfam09685	DUF4870	Domain of unknown function (DUF4870).	1	4	338	674	0.868961
338061	pfam11680	DUF3276	Protein of unknown function (DUF3276).	1	4	338	674	0.868961
338632	pfam13205	Big_5	Bacterial Ig-like domain.	1	4	338	674	0.868961
338833	pfam13588	HSDR_N_2	Type I restriction enzyme R protein N-terminus (HSDR_N).	1	4	338	674	0.868961
340838	cd03809	GT4_MtfB-like	glycosyltransferases MtfB, WbpX, and similar proteins.	1	4	338	674	0.868961
340839	cd03811	GT4_GT28_WabH-like	family 4 and family 28 glycosyltransferases similar to Klebsiella WabH.	1	4	338	674	0.868961
351106	cl00470	Aldo_ket_red	N/A.	1	4	338	674	0.868961
352048	cl03757	phosphohexomutase	N/A.	1	4	338	674	0.868961
353814	cl14615	PI-PLCc_GDPD_SF	Catalytic domain of phosphoinositide-specific phospholipase C-like phosphodiesterases superfamily.	1	4	338	674	0.868961
356503	cl29627	BglB	Beta-glucosidase/6-phospho-beta-glucosidase/beta-galactosidase [Carbohydrate transport and metabolism].	1	4	338	674	0.868961
355014	cl23716	metallo-hydrolase-like_MBL-fold	mainly hydrolytic enzymes and related proteins which carry out various biological functions; MBL-fold metallohydrolase domain.	4	13	335	665	0.871668
223736	COG0664	Crp	cAMP-binding domain of CRP or a regulatory subunit of cAMP-dependent protein kinases [Signal transduction mechanisms].	20	53	319	625	0.895009
238657	cd01347	ligand_gated_channel	TonB dependent/Ligand-Gated channels are created by a monomeric 22 strand (22,24) anti-parallel beta-barrel.	3	11	336	667	0.896281
197775	smart00530	HTH_XRE	Helix-turn-helix XRE-family like proteins.	2	8	337	670	0.897104
224007	COG1082	YcjR	Sugar phosphate isomerase/epimerase [Carbohydrate transport and metabolism].	2	8	337	670	0.897104
225148	COG2239	MgtE	Mg/Co/Ni transporter MgtE (contains CBS domain) [Inorganic ion transport and metabolism].	2	8	337	670	0.897104
238182	cd00293	USP_Like	Usp: Universal stress protein family.	2	8	337	670	0.897104
339708	pfam16355	DUF4982	Domain of unknown function (DUF4982).	2	8	337	670	0.897104
350880	cl00057	vWFA	N/A.	2	8	337	670	0.897104
274357	TIGR02937	sigma70-ECF	RNA polymerase sigma factor, sigma-70 family.	9	27	330	651	0.89866
310797	pfam06439	DUF1080	Domain of Unknown Function (DUF1080).	4	14	335	664	0.90038
353799	cl13995	MPP_superfamily	metallophosphatase superfamily, metallophosphatase domain.	4	14	335	664	0.90038
129820	TIGR00737	nifR3_yhdG	putative TIM-barrel protein, nifR3 family.	1	5	338	673	0.912856
143599	cd07575	Xc-1258_like	Xanthomonas campestris XC1258 and related proteins, members of the nitrilase superfamily (putative class 13 nitrilases).	1	5	338	673	0.912856
223104	COG0025	NhaP	NhaP-type Na+/H+ or K+/H+ antiporter [Inorganic ion transport and metabolism].	1	5	338	673	0.912856
223411	COG0334	GdhA	Glutamate dehydrogenase/leucine dehydrogenase [Amino acid transport and metabolism].	1	5	338	673	0.912856
224029	COG1104	NifS	Cysteine sulfinate desulfinase/cysteine desulfurase or related enzyme [Amino acid transport and metabolism].	1	5	338	673	0.912856
224089	COG1167	ARO8	DNA-binding transcriptional regulator, MocR family, contains an aminotransferase domain [Transcription, Amino acid transport and metabolism].	1	5	338	673	0.912856
234619	PRK00080	ruvB	Holliday junction DNA helicase RuvB; Reviewed	1	5	338	673	0.912856
234849	PRK00856	pyrB	aspartate carbamoyltransferase catalytic subunit; Provisional	1	5	338	673	0.912856
235432	PRK05367	PRK05367	glycine dehydrogenase; Provisional	1	5	338	673	0.912856
235976	PRK07232	PRK07232	bifunctional malic enzyme oxidoreductase/phosphotransacetylase; Reviewed	1	5	338	673	0.912856
236181	PRK08193	araD	L-ribulose-5-phosphate 4-epimerase; Reviewed	1	5	338	673	0.912856
236583	PRK09601	PRK09601	GTP-binding protein YchF; Reviewed	1	5	338	673	0.912856
236873	PRK11186	PRK11186	carboxy-terminal protease; Provisional	1	5	338	673	0.912856
239488	cd03394	PAP2_like_5	PAP2_like_5 proteins.	1	5	338	673	0.912856
273332	TIGR00911	2A0308	L-type amino acid transporter.	1	5	338	673	0.912856
274513	TIGR03302	OM_YfiO	outer membrane assembly lipoprotein YfiO.	1	5	338	673	0.912856
311738	pfam07920	DUF1684	Protein of unknown function (DUF1684).	1	5	338	673	0.912856
312075	pfam08448	PAS_4	PAS fold.	1	5	338	673	0.912856
320982	cl00456	SLC5-6-like_sbd	Solute carrier families 5 and 6-like; solute binding domain.	1	5	338	673	0.912856
329773	cl24758	DUF5128	6-bladed beta-propeller.	1	5	338	673	0.912856
334687	pfam01804	Penicil_amidase	Penicillin amidase.	1	5	338	673	0.912856
334941	pfam02482	Ribosomal_S30AE	Sigma 54 modulation protein / S30EA ribosomal protein.	1	5	338	673	0.912856
336064	pfam05221	AdoHcyase	S-adenosyl-L-homocysteine hydrolase.	1	5	338	673	0.912856
336149	pfam05592	Bac_rhamnosid	Bacterial alpha-L-rhamnosidase concanavalin-like domain.	1	5	338	673	0.912856
337216	pfam08818	DUF1801	Domain of unknown function (DU1801).	1	5	338	673	0.912856
337692	pfam10282	Lactonase	Lactonase, 7-bladed beta-propeller.	1	5	338	673	0.912856
338771	pfam13489	Methyltransf_23	Methyltransferase domain.	1	5	338	673	0.912856
338830	pfam13578	Methyltransf_24	Methyltransferase domain.	1	5	338	673	0.912856
340105	pfam17390	Bac_rhamnosid_C	Bacterial alpha-L-rhamnosidase C-terminal domain.	1	5	338	673	0.912856
351117	cl00490	EEP	Exonuclease-Endonuclease-Phosphatase (EEP) domain superfamily.	1	5	338	673	0.912856
351494	cl01412	Alpha-L-AF_C	Alpha-L-arabinofuranosidase C-terminal domain.	1	5	338	673	0.912856
338914	pfam13715	CarbopepD_reg_2	CarboxypepD_reg-like domain.	29	75	310	603	0.913593
223619	COG0545	FkpA	FKBP-type peptidyl-prolyl cis-trans isomerase [Posttranslational modification, protein turnover, chaperones].	3	12	336	666	0.922179
225546	COG3000	ERG3	Sterol desaturase/sphingolipid hydroxylase, fatty acid hydroxylase superfamily [Lipid transport and metabolism].	3	12	336	666	0.922179
336894	pfam07995	GSDH	Glucose / Sorbosone dehydrogenase.	3	12	336	666	0.922179
225405	COG2849	YwqK	Antitoxin component YwqK of the YwqJK toxin-antitoxin module [Defense mechanisms].	2	9	337	669	0.925949
274730	TIGR03696	Rhs_assc_core	RHS repeat-associated core domain.	2	9	337	669	0.925949
335119	pfam02838	Glyco_hydro_20b	Glycosyl hydrolase family 20, domain 2.	2	9	337	669	0.925949
351360	cl01053	SGNH_hydrolase	N/A.	2	9	337	669	0.925949
352957	cl09326	MATE_like	Multidrug and toxic compound extrusion family and similar proteins.	2	9	337	669	0.925949
355390	cl25403	ABC_ATPase	ATP-binding cassette transporter nucleotide-binding domain.	6	21	333	657	0.930707
223560	COG0484	DnaJ	DnaJ-class molecular chaperone with C-terminal Zn finger domain [Posttranslational modification, protein turnover, chaperones].	1	6	338	672	0.942077
223732	COG0659	SUL1	Sulfate permease or related transporter, MFS superfamily [Inorganic ion transport and metabolism].	1	6	338	672	0.942077
223890	COG0820	RlmN	Adenine C2-methylase RlmN of 23S rRNA A2503 and tRNA A37 [Translation, ribosomal structure and biogenesis].	1	6	338	672	0.942077
223964	COG1033	COG1033	Predicted exporter protein, RND superfamily [General function prediction only].	1	6	338	672	0.942077
224172	COG1252	Ndh	NADH dehydrogenase, FAD-containing subunit [Energy production and conversion].	1	6	338	672	0.942077
224679	COG1765	YhfA	Uncharacterized OsmC-related protein [General function prediction only].	1	6	338	672	0.942077
225039	COG2128	YciW	Alkylhydroperoxidase family enzyme, contains CxxC motif [Inorganic ion transport and metabolism].	1	6	338	672	0.942077
275083	TIGR04256	GxxExxY	GxxExxY protein.	1	6	338	672	0.942077
277343	cd07398	MPP_YbbF-LpxH	Escherichia coli YbbF/LpxH and related proteins, metallophosphatase domain.	1	6	338	672	0.942077
307188	pfam00924	MS_channel	Mechanosensitive ion channel.	1	6	338	672	0.942077
312140	pfam08531	Bac_rhamnosid_N	Alpha-L-rhamnosidase N-terminal domain.	1	6	338	672	0.942077
329099	cl23815	Glyco_hydro_30	Glycosyl hydrolase family 30 TIM-barrel domain.	1	6	338	672	0.942077
334888	pfam02311	AraC_binding	AraC-like ligand binding domain.	1	6	338	672	0.942077
336364	pfam06283	ThuA	Trehalose utilisation.	1	6	338	672	0.942077
351786	cl02526	Peptidase_S41	C-terminal processing peptidase family S41.	1	6	338	672	0.942077
354318	cl17182	NAT_SF	N-Acyltransferase superfamily: Various enyzmes that characteristicly catalyze the transfer of an acyl group to a substrate.	1	6	338	672	0.942077
353239	cl11394	Glyco_tranf_GTA_type	Glycosyltransferase family A (GT-A) includes diverse families of glycosyl transferases with a common GT-A type structural fold.	5	19	334	659	0.942786
224511	COG1595	RpoE	DNA-directed RNA polymerase specialized sigma subunit, sigma24 family [Transcription].	6	22	333	656	0.945306
354836	cl21494	Abhydrolase	alpha/beta hydrolases.	6	22	333	656	0.945306
239245	cd02947	TRX_family	TRX family; composed of two groups: Group I, which includes proteins that exclusively encode a TRX domain; and Group II, which are composed of fusion proteins of TRX and additional domains.	2	10	337	668	0.947049
289537	pfam12771	SusD-like_2	Starch-binding associating with outer membrane.	2	10	337	668	0.947049
335405	pfam03629	SASA	Carbohydrate esterase, sialic acid-specific acetylesterase.	2	10	337	668	0.947049
336444	pfam06580	His_kinase	Histidine kinase.	2	10	337	668	0.947049
336779	pfam07715	Plug	TonB-dependent Receptor Plug Domain.	2	10	337	668	0.947049
336971	pfam08241	Methyltransf_11	Methyltransferase domain.	2	10	337	668	0.947049
349910	cd05660	M28_like_PA	M28 Zn-peptidase containing a protease-associated (PA) domain insert.	2	10	337	668	0.947049
350990	cl00262	TroA-like	N/A.	2	10	337	668	0.947049
223669	COG0596	MhpC	Pimeloyl-ACP methyl ester carboxylesterase [Coenzyme transport and metabolism, General function prediction only].	8	28	331	650	0.951622
335694	pfam04264	YceI	YceI-like domain.	4	17	335	661	0.95546
351096	cl00447	Nudix_Hydrolase	N/A.	3	14	336	664	0.957121
339421	pfam14905	OMP_b-brl_3	Outer membrane protein beta-barrel family.	10	34	329	644	0.958189
119407	cd02696	MurNAc-LAA	N-acetylmuramoyl-L-alanine amidase or MurNAc-LAA (also known as peptidoglycan aminohydrolase, NAMLA amidase, NAMLAA, Amidase 3, and peptidoglycan amidase; EC 3.	1	7	338	671	0.961518
180170	PRK05626	rpsO	30S ribosomal protein S15; Reviewed	1	7	338	671	0.961518
223482	COG0405	Ggt	Gamma-glutamyltranspeptidase [Amino acid transport and metabolism].	1	7	338	671	0.961518
273807	TIGR01785	TonB-hemin	TonB-dependent heme/hemoglobin receptor family protein.	1	7	338	671	0.961518
314142	pfam11138	DUF2911	Protein of unknown function (DUF2911).	1	7	338	671	0.961518
333784	pfam00034	Cytochrom_C	Cytochrome c.	1	7	338	671	0.961518
351126	cl00509	hot_dog	N/A.	1	7	338	671	0.961518
333749	NF033071	SusD	starch-binding outer membrane lipoprotein SusD.	2	11	337	667	0.962349
355016	cl23718	ALP_like	alkaline phosphatases and sulfatases.	2	11	337	667	0.962349
225114	COG2204	AtoC	DNA-binding transcriptional response regulator, NtrC family, contains REC, AAA-type ATPase, and a Fis-type DNA-binding domains [Signal transduction mechanisms].	4	18	335	660	0.966387
239264	cd02966	TlpA_like_family	TlpA-like family; composed of TlpA, ResA, DsbE and similar proteins.	6	25	333	653	0.974046
185696	cd09019	galactose_mutarotase_like	galactose mutarotase_like.	1	8	338	670	0.974447
223777	COG0705	GlpG	Membrane associated serine protease, rhomboid family [Posttranslational modification, protein turnover, chaperones].	1	8	338	670	0.974447
238219	cd00371	HMA	Heavy-metal-associated domain (HMA) is a conserved domain of approximately 30 amino acid residues found in a number of proteins that transport or detoxify heavy metals, for example, the CPx-type heavy metal ATPases and copper chaperones.	1	8	338	670	0.974447
309021	pfam03739	YjgP_YjgQ	Predicted permease YjgP/YjgQ family.	1	8	338	670	0.974447
311934	pfam08239	SH3_3	Bacterial SH3 domain.	1	8	338	670	0.974447
334297	pfam00877	NLPC_P60	NlpC/P60 family.	1	8	338	670	0.974447
338450	pfam12698	ABC2_membrane_3	ABC-2 family transporter protein.	1	8	338	670	0.974447
340104	pfam17389	Bac_rhamnosid6H	Bacterial alpha-L-rhamnosidase 6 hairpin glycosidase domain.	1	8	338	670	0.974447
354826	cl21474	ABC2_membrane	ABC-2 type transporter.	1	8	338	670	0.974447
354317	cl17173	AdoMet_MTases	N/A.	4	19	335	659	0.974779
224423	COG1506	DAP2	Dipeptidyl aminopeptidase/acylaminoacyl peptidase [Amino acid transport and metabolism].	3	16	336	662	0.976942
224647	COG1733	HxlR	DNA-binding transcriptional regulator, HxlR family [Transcription].	3	16	336	662	0.976942
339168	pfam14322	SusD-like_3	Starch-binding associating with outer membrane.	3	16	336	662	0.976942
225117	COG2207	AraC	AraC-type DNA-binding domain and AraC-containing proteins [Transcription].	20	63	319	615	0.978622
223816	COG0745	OmpR	DNA-binding response regulator, OmpR family, contains REC and winged-helix (wHTH) domain [Signal transduction mechanisms, Transcription].	4	20	335	658	0.981178
223979	COG1051	YjhB	ADP-ribose pyrophosphatase YjhB, NUDIX family [Nucleotide transport and metabolism].	1	9	338	669	0.983041
224594	COG1680	AmpC	CubicO group peptidase, beta-lactamase class C family [Defense mechanisms].	1	9	338	669	0.983041
353072	cl10459	Peptidases_S8_S53	Peptidase domain in the S8 and S53 families.	1	9	338	669	0.983041
238045	cd00093	HTH_XRE	Helix-turn-helix XRE-family like proteins.	6	27	333	651	0.984627
213222	cd03255	ABC_MJ0796_LolCDE_FtsE	ATP-binding cassette domain of the transporters involved in export of lipoprotein and macrolide, and cell division protein.	2	14	337	664	0.986833
224055	COG1132	MdlB	ABC-type multidrug transport system, ATPase and permease component [Defense mechanisms].	2	14	337	664	0.986833
176856	cd07814	SRPBCC_CalC_Aha1-like	Putative hydrophobic ligand-binding SRPBCC domain of Micromonospora echinospora CalC, human Aha1, and related proteins.	1	10	338	668	0.98875
224054	COG1131	CcmA	ABC-type multidrug transport system, ATPase component [Defense mechanisms].	1	10	338	668	0.98875
225112	COG2202	PAS	PAS domain [Signal transduction mechanisms].	1	10	338	668	0.98875
341067	cd09604	M1_APN_like	Peptidase M1 family similar to aminopeptidase N catalytic domain.	1	10	338	668	0.98875
354815	cl21459	HTH	Helix-turn-helix domains.	4	22	335	656	0.989671
274350	TIGR02917	PEP_TPR_lipo	putative PEP-CTERM system TPR-repeat lipoprotein.	5	26	334	652	0.99155
185053	PRK15098	PRK15098	beta-D-glucoside glucohydrolase; Provisional	1	11	338	667	0.992541
238042	cd00090	HTH_ARSR	Arsenical Resistance Operon Repressor and similar prokaryotic, metal regulated homodimeric repressors.	1	11	338	667	0.992541
307855	pfam01925	TauE	Sulfite exporter TauE/SafE.	1	11	338	667	0.992541
143586	cd07185	OmpA_C-like	Peptidoglycan binding domains similar to the C-terminal domain of outer-membrane protein OmpA.	8	36	331	642	0.992928
351069	cl00388	Thioredoxin_like	Protein Disulfide Oxidoreductases and Other Proteins with a Thioredoxin fold.	2	16	337	662	0.993586
354812	cl21455	P-loop_NTPase	P-loop containing Nucleoside Triphosphate Hydrolases.	2	16	337	662	0.993586
274576	TIGR03434	ADOP	Acidobacterial duplicated orphan permease.	3	21	336	657	0.995499
314592	pfam11751	PorP_SprF	Type IX secretion system membrane protein PorP/SprF.	2	17	337	661	0.995544
336750	pfam07610	DUF1573	Protein of unknown function (DUF1573).	1	17	338	661	0.999373
338824	pfam13568	OMP_b-brl_2	Outer membrane protein beta-barrel domain.	2	23	337	655	0.999525
354832	cl21487	OM_channels	N/A.	8	46	331	632	0.999553
338527	pfam12867	DinB_2	DinB superfamily.	1	19	338	659	0.999726
355015	cl23717	crotonase-like	N/A.	1	19	338	659	0.999726
355392	cl25409	SDR	Short-chain dehydrogenases/reductases (SDR).	8	49	331	629	0.999817
99707	cd00009	AAA	The AAA+ (ATPases Associated with a wide variety of cellular Activities) superfamily represents an ancient group of ATPases belonging to the ASCE (for additional strand, catalytic E) division of the P-loop NTPase fold.	0	0	339	678	1
99734	cd00609	AAT_like	Aspartate aminotransferase family.	0	0	339	678	1
99748	cd06502	TA_like	Low-specificity threonine aldolase (TA).	0	0	339	678	1
99750	cd06259	YdcF-like	YdcF-like.	0	0	339	678	1
99778	cd00322	FNR_like	Ferredoxin reductase (FNR), an FAD and NAD(P) binding protein, was intially identified as a chloroplast reductase activity, catalyzing the electron transfer from reduced iron-sulfur protein ferredoxin to NADP+ as the final step in the electron transport mechanism of photosystem I.	0	0	339	678	1
99781	cd06184	flavohem_like_fad_nad_binding	FAD_NAD(P)H binding domain of flavohemoglobin.	0	0	339	678	1
99811	cd06215	FNR_iron_sulfur_binding_1	Iron-sulfur binding ferredoxin reductase (FNR) proteins combine the FAD and NAD(P) binding regions of FNR with an iron-sulfur binding cluster domain.	0	0	339	678	1
99814	cd06218	DHOD_e_trans	FAD/NAD binding domain in the electron transfer subunit of dihydroorotate dehydrogenase.	0	0	339	678	1
99834	cd06130	DNA_pol_III_epsilon_like	an uncharacterized bacterial subgroup of the DEDDh 3'-5' exonuclease domain family with similarity to the epsilon subunit of DNA polymerase III.	0	0	339	678	1
100007	cd06150	YjgF_YER057c_UK114_like_2	This group of proteins belong to a large family of YjgF/YER057c/UK114-like proteins present in bacteria, archaea, and eukaryotes with no definitive function.	0	0	339	678	1
100008	cd06151	YjgF_YER057c_UK114_like_3	This group of proteins belong to a large family of YjgF/YER057c/UK114-like proteins present in bacteria, archaea, and eukaryotes with no definitive function.	0	0	339	678	1
100011	cd06154	YjgF_YER057c_UK114_like_6	This group of proteins belong to a large family of YjgF/YER057c/UK114-like proteins present in bacteria, archaea, and eukaryotes with no definitive function.	0	0	339	678	1
100045	cd03354	LbH_SAT	Serine acetyltransferase (SAT): SAT catalyzes the CoA-dependent acetylation of the side chain hydroxyl group of L-serine to form O-acetylserine, as the first step of a two-step biosynthetic pathway in bacteria and plants leading to the formation of L-cysteine.	0	0	339	678	1
100058	cd04745	LbH_paaY_like	paaY-like: This group is composed by uncharacterized proteins with similarity to the protein product of the E.	0	0	339	678	1
100078	cd05709	S2P-M50	Site-2 protease (S2P) class of zinc metalloproteases (MEROPS family M50) cleaves transmembrane domains of substrate proteins, regulating intramembrane proteolysis (RIP) of diverse signal transduction mechanisms.	0	0	339	678	1
100081	cd06160	S2P-M50_like_2	Uncharacterized homologs of Site-2 protease (S2P), zinc metalloproteases (MEROPS family M50) which cleave transmembrane domains of substrate proteins, regulating intramembrane proteolysis (RIP) of diverse signal transduction mechanisms.	0	0	339	678	1
100092	cd05799	PGM2	This CD includes PGM2 (phosphoglucomutase 2) and PGM2L1 (phosphoglucomutase 2-like 1).	0	0	339	678	1
105206	PRK11383	PRK11383	hypothetical protein; Provisional	0	0	339	678	1
107205	cd01562	Thr-dehyd	Threonine dehydratase: The first step in amino acid degradation is the removal of nitrogen.	0	0	339	678	1
107221	cd06464	ACD_sHsps-like	Alpha-crystallin domain (ACD) of alpha-crystallin-type small(s) heat shock proteins (Hsps).	0	0	339	678	1
107256	cd01543	PBP1_XylR	Ligand-binding domain of DNA transcription repressor specific for xylose (XylR).	0	0	339	678	1
107283	cd06288	PBP1_sucrose_transcription_regulator	Ligand-binding domain of DNA-binding regulatory proteins specific to sucrose that are members of the LacI-GalR family of bacterial transcription repressors.	0	0	339	678	1
107284	cd06289	PBP1_MalI_like	Ligand-binding domain of MalI, a transcription regulator of the maltose system of Escherichia coli and its close homologs from other bacteria.	0	0	339	678	1
107318	cd06323	PBP1_ribose_binding	Periplasmic sugar-binding domain of the thermophilic Thermoanaerobacter tengcongensis ribose binding protein (ttRBP) and its mesophilic homologs.	0	0	339	678	1
107320	cd06325	PBP1_ABC_uncharacterized_transporter	Type I periplasmic ligand-binding domain of uncharacterized ABC-type transport systems that are predicted to be involved in the uptake of amino acids, peptides, or inorganic ions.	0	0	339	678	1
107352	cd06357	PBP1_AmiC	Periplasmic binding domain of amidase (AmiC) that belongs to the type I periplasmic binding fold protein family.	0	0	339	678	1
110924	pfam01972	SDH_sah	Serine dehydrogenase proteinase.	0	0	339	678	1
114219	pfam05483	SCP-1	Synaptonemal complex protein 1 (SCP-1).	0	0	339	678	1
119321	cd06579	TM_PBP1_transp_AraH_like	Transmembrane subunit (TM) of Escherichia coli AraH and related proteins.	0	0	339	678	1
119328	cd06577	PASTA_pknB	PASTA domain of bacterial serine/threonine kinase pknB-like proteins.	0	0	339	678	1
119334	cd06564	GH20_DspB_LnbB-like	Glycosyl hydrolase family 20 (GH20) catalytic domain of dispersin B (DspB), lacto-N-biosidase (LnbB) and related proteins.	0	0	339	678	1
119338	cd06570	GH20_chitobiase-like_1	A functionally uncharacterized subgroup of the Glycosyl hydrolase family 20 (GH20) catalytic domain found in proteins similar to the chitobiase of Serratia marcescens, a beta-N-1,4-acetylhexosaminidase that hydrolyzes the beta-1,4-glycosidic linkages in oligomers derived from chitin.	0	0	339	678	1
119362	cd06545	GH18_3CO4_chitinase	The Bacteroides thetaiotaomicron protein represented by pdb structure 3CO4 is an uncharacterized bacterial member of the family 18 glycosyl hydrolases with homologs found in Flavobacterium, Stigmatella, and Pseudomonas.	0	0	339	678	1
119399	cd00082	HisKA	Histidine Kinase A (dimerization/phosphoacceptor) domain; Histidine Kinase A dimers are formed through parallel association of 2 domains creating 4-helix bundles; usually these domains contain a conserved His residue and are activated via trans-autophosphorylation by the catalytic domain of the histidine kinase.	0	0	339	678	1
129576	TIGR00485	EF-Tu	translation elongation factor TU.	0	0	339	678	1
129802	TIGR00719	sda_beta	L-serine dehydratase, iron-sulfur-dependent, beta subunit.	0	0	339	678	1
129864	TIGR00782	ccoP	cytochrome c oxidase, cbb3-type, subunit III.	0	0	339	678	1
129974	TIGR00896	CynX	cyanate transporter.	0	0	339	678	1
129983	TIGR00905	2A0302	transporter, basic amino acid/polyamine antiporter (APA) family.	0	0	339	678	1
130065	TIGR00992	3a0901s03IAP75	chloroplast envelope protein translocase, IAP75 family.	0	0	339	678	1
130141	TIGR01069	mutS2	MutS2 family protein.	0	0	339	678	1
130253	TIGR01185	devC	DevC protein.	0	0	339	678	1
130274	TIGR01207	rmlA	glucose-1-phosphate thymidylyltransferase, short form.	0	0	339	678	1
130454	TIGR01387	cztR_silR_copR	heavy metal response regulator.	0	0	339	678	1
130724	TIGR01663	PNK-3'Pase	polynucleotide 5'-kinase 3'-phosphatase.	0	0	339	678	1
130740	TIGR01679	bact_FAD_ox	FAD-linked oxidoreductase.	0	0	339	678	1
131034	TIGR01979	sufS	cysteine desulfurases, SufSfamily.	0	0	339	678	1
131209	TIGR02154	PhoB	phosphate regulon transcriptional regulatory protein PhoB.	0	0	339	678	1
131210	TIGR02155	PA_CoA_ligase	phenylacetate-CoA ligase.	0	0	339	678	1
131214	TIGR02159	PA_CoA_Oxy4	phenylacetate-CoA oxygenase, PaaJ subunit.	0	0	339	678	1
131231	TIGR02176	pyruv_ox_red	pyruvate:ferredoxin (flavodoxin) oxidoreductase, homodimeric.	0	0	339	678	1
131234	TIGR02179	PorD_KorD	2-oxoacid:acceptor oxidoreductase, delta subunit, pyruvate/2-ketoisovalerate family.	0	0	339	678	1
131258	TIGR02203	MsbA_lipidA	lipid A export permease/ATP-binding protein MsbA.	0	0	339	678	1
131259	TIGR02204	MsbA_rel	ABC transporter, permease/ATP-binding protein.	0	0	339	678	1
131339	TIGR02286	PaaD	phenylacetic acid degradation protein PaaD.	0	0	339	678	1
131356	TIGR02303	HpaG-C-term	4-hydroxyphenylacetate degradation bifunctional isomerase/decarboxylase, C-terminal subunit.	0	0	339	678	1
131385	TIGR02332	HpaX	4-hydroxyphenylacetate permease.	0	0	339	678	1
131451	TIGR02398	gluc_glyc_Psyn	glucosylglycerol-phosphate synthase.	0	0	339	678	1
131525	TIGR02472	sucr_P_syn_N	sucrose-phosphate synthase, putative, glycosyltransferase domain.	0	0	339	678	1
131526	TIGR02473	flagell_FliJ	flagellar export protein FliJ.	0	0	339	678	1
131546	TIGR02493	PFLA	pyruvate formate-lyase 1-activating enzyme.	0	0	339	678	1
131685	TIGR02637	RhaS	rhamnose ABC transporter, rhamnose-binding protein.	0	0	339	678	1
131688	TIGR02640	gas_vesic_GvpN	gas vesicle protein GvpN.	0	0	339	678	1
131715	TIGR02667	moaB_proteo	molybdenum cofactor biosynthesis protein B, proteobacterial.	0	0	339	678	1
131723	TIGR02675	tape_meas_nterm	tape measure domain.	0	0	339	678	1
131763	TIGR02716	C20_methyl_CrtF	C-20 methyltransferase BchU.	0	0	339	678	1
131843	TIGR02796	tolQ	TolQ protein.	0	0	339	678	1
131862	TIGR02815	agaS_fam	putative sugar isomerase, AgaS family.	0	0	339	678	1
131984	TIGR02938	nifL_nitrog	nitrogen fixation negative regulator NifL.	0	0	339	678	1
131997	TIGR02952	Sig70_famx2	RNA polymerase sigma-70 factor, TIGR02952 family.	0	0	339	678	1
132039	TIGR02994	ectoine_eutE	ectoine utilization protein EutE.	0	0	339	678	1
132048	TIGR03003	ectoine_ehuD	ectoine/hydroxyectoine ABC transporter, permease protein EhuD.	0	0	339	678	1
132050	TIGR03005	ectoine_ehuA	ectoine/hydroxyectoine ABC transporter, ATP-binding protein.	0	0	339	678	1
132073	TIGR03028	EpsE	polysaccharide export protein EpsE.	0	0	339	678	1
132152	TIGR03108	eps_aminotran_1	exosortase A system-associated amidotransferase 1.	0	0	339	678	1
132195	TIGR03151	enACPred_II	putative enoyl-[acyl-carrier-protein] reductase II.	0	0	339	678	1
132382	TIGR03339	phn_lysR	aminoethylphosphonate catabolism associated LysR family transcriptional regulator.	0	0	339	678	1
132448	TIGR03407	urea_ABC_UrtA	urea ABC transporter, urea binding protein.	0	0	339	678	1
132526	TIGR03487	cas_csp2	CRISPR-associated protein Cas8c/Csp2, subtype PGING.	0	0	339	678	1
132563	TIGR03524	GldJ	gliding motility-associated lipoprotein GldJ.	0	0	339	678	1
132628	TIGR03589	PseB	UDP-N-acetylglucosamine 4,6-dehydratase (inverting).	0	0	339	678	1
132883	cd07062	Peptidase_S66_mccF_like	Microcin C7 self-immunity protein determines resistance to exogenous microcin C7.	0	0	339	678	1
132913	cd07042	STAS_SulP_like_sulfate_transporter	Sulphate Transporter and Anti-Sigma factor antagonist domain of SulP-like sulfate transporters, plays a role in the function and regulation of the transport activity, proposed general NTP binding function.	0	0	339	678	1
132927	cd07016	S14_ClpP_1	Caseinolytic protease (ClpP) is an ATP-dependent, highly conserved serine protease.	0	0	339	678	1
132928	cd07017	S14_ClpP_2	Caseinolytic protease (ClpP) is an ATP-dependent, highly conserved serine protease.	0	0	339	678	1
132933	cd07022	S49_Sppa_36K_type	Signal peptide peptidase A (SppA) 36K type, a serine protease, has catalytic Ser-Lys dyad.	0	0	339	678	1
132934	cd07023	S49_Sppa_N_C	Signal peptide peptidase A (SppA), a serine protease, has catalytic Ser-Lys dyad.	0	0	339	678	1
132992	cd06974	TerD_like	Uncharacterized proteins involved in stress response, similar to tellurium resistance terD.	0	0	339	678	1
133000	cd02503	MobA	MobA catalyzes the formation of molybdopterin guanine dinucleotide.	0	0	339	678	1
133009	cd02516	CDP-ME_synthetase	CDP-ME synthetase is involved in mevalonate-independent isoprenoid production.	0	0	339	678	1
133015	cd02524	G1P_cytidylyltransferase	G1P_cytidylyltransferase catalyzes the production of CDP-D-Glucose.	0	0	339	678	1
133027	cd04184	GT2_RfbC_Mx_like	Myxococcus xanthus RfbC like proteins are required for O-antigen biosynthesis.	0	0	339	678	1
133038	cd04195	GT2_AmsE_like	GT2_AmsE_like is involved in exopolysaccharide amylovora biosynthesis.	0	0	339	678	1
133380	cd01105	HTH_GlnR-like	Helix-Turn-Helix DNA binding domain of GlnR-like transcription regulators.	0	0	339	678	1
133381	cd01106	HTH_TipAL-Mta	Helix-Turn-Helix DNA binding domain of the transcription regulators TipAL, Mta, and SkgA.	0	0	339	678	1
133383	cd01108	HTH_CueR	Helix-Turn-Helix DNA binding domain of CueR-like transcription regulators.	0	0	339	678	1
133411	cd04784	HTH_CadR-PbrR	Helix-Turn-Helix DNA binding domain of the CadR and PbrR transcription regulators.	0	0	339	678	1
133457	cd06848	GCS_H	Glycine cleavage H-protein.	0	0	339	678	1
133464	cd06854	GT_WbpL_WbcO_like	The members of this subfamily catalyze the formation of a phosphodiester bond between a membrane-associated undecaprenyl-phosphate (Und-P) molecule and N-acetylhexosamine 1-phosphate, which is usually donated by a soluble UDP-N-acetylhexosamine precursor.	0	0	339	678	1
133467	cd06912	GT_MraY_like	This subfamily is composed of uncharacterized bacterial glycosyltransferases in the MraY-like family.	0	0	339	678	1
133475	cd06583	PGRP	Peptidoglycan recognition proteins (PGRPs) are pattern recognition receptors that bind, and in certain cases, hydrolyze peptidoglycans (PGNs) of bacterial cell walls.	0	0	339	678	1
133477	cd06971	PgpA	Phosphatidylglycerophosphatase A; a bacterial membrane-associated enzyme involved in lipid metabolism.	0	0	339	678	1
137467	PRK09677	PRK09677	putative lipopolysaccharide biosynthesis O-acetyl transferase WbbJ; Provisional	0	0	339	678	1
137559	PRK09859	PRK09859	multidrug efflux system protein MdtE; Provisional	0	0	339	678	1
143331	cd01392	HTH_LacI	Helix-turn-helix (HTH) DNA binding domain of the LacI family of transcriptional regulators.	0	0	339	678	1
143388	cd05398	NT_ClassII-CCAase	Nucleotidyltransferase (NT) domain of ClassII CCA-adding enzymes.	0	0	339	678	1
143390	cd05400	NT_2-5OAS_ClassI-CCAase	Nucleotidyltransferase (NT) domain of 2'5'-oligoadenylate (2-5A)synthetase (2-5OAS) and class I CCA-adding enzyme.	0	0	339	678	1
143393	cd05403	NT_KNTase_like	Nucleotidyltransferase (NT) domain of Staphylococcus aureus kanamycin nucleotidyltransferase, and similar proteins.	0	0	339	678	1
143398	cd07079	ALDH_F18-19_ProA-GPR	Gamma-glutamyl phosphate reductase (GPR), aldehyde dehydrogenase families 18 and 19.	0	0	339	678	1
143415	cd07097	ALDH_KGSADH-YcbD	Bacillus subtilis NADP+-dependent alpha-ketoglutaric semialdehyde dehydrogenase ycbD-like.	0	0	339	678	1
143421	cd07103	ALDH_F5_SSADH_GabD	Mitochondrial succinate-semialdehyde dehydrogenase and ALDH family members 5A1 and 5F1-like.	0	0	339	678	1
143424	cd07106	ALDH_AldA-AAD23400	Streptomyces aureofaciens putative aldehyde dehydrogenase AldA (AAD23400)-like.	0	0	339	678	1
143429	cd07111	ALDH_F16	Aldehyde dehydrogenase family 16A1-like.	0	0	339	678	1
143451	cd07133	ALDH_CALDH_CalB	Coniferyl aldehyde dehydrogenase-like.	0	0	339	678	1
143481	cd00430	PLPDE_III_AR	Type III Pyridoxal 5-phosphate (PLP)-Dependent Enzyme Alanine Racemase.	0	0	339	678	1
143500	cd06827	PLPDE_III_AR_proteobact	Type III Pyridoxal 5-phosphate (PLP)-Dependent Enzymes, Proteobacterial Alanine Racemases.	0	0	339	678	1
143585	cd07316	terB_like_DjlA	N-terminal tellurium resistance protein terB-like domain of heat shock DnaJ-like proteins.	0	0	339	678	1
143588	cd07564	nitrilases_CHs	Nitrilases, cyanide hydratase (CH)s, and similar proteins (class 1 nitrilases).	0	0	339	678	1
143597	cd07573	CPA	N-carbamoylputrescine amidohydrolase (CPA) (class 11 nitrilases).	0	0	339	678	1
143600	cd07576	R-amidase_like	Pseudomonas sp.	0	0	339	678	1
143622	cd07750	PolyPPase_VTC_like	Polyphosphate(polyP) polymerase domain of yeast vacuolar transport chaperone (VTC) proteins VTC-2, -3 and- 4, and similar proteins.	0	0	339	678	1
143628	cd07890	CYTH-like_AC_IV-like	Adenylyl cyclase (AC) class IV-like, a subgroup of the CYTH-like superfamily.	0	0	339	678	1
153073	cd03603	CLECT_VCBS	A bacterial subgroup of the C-type lectin-like (CTLD) domain; a subgroup of bacterial protein domains homologous to the carbohydrate-recognition domains (CRDs) of the C-type lectins.	0	0	339	678	1
153081	cd00643	HMG-CoA_reductase_classI	Class I hydroxymethylglutaryl-coenzyme A (HMG-CoA) reductase (HMGR).	0	0	339	678	1
153087	cd01678	PFL1	Pyruvate formate lyase 1.	0	0	339	678	1
153099	cd00907	Bacterioferritin	Bacterioferritin, ferritin-like diiron-binding domain.	0	0	339	678	1
153108	cd01049	RNRR2	Ribonucleotide Reductase, R2/beta subunit, ferritin-like diiron-binding domain.	0	0	339	678	1
153214	cd01743	GATase1_Anthranilate_Synthase	Type 1 glutamine amidotransferase (GATase1) domain found in Anthranilate synthase.	0	0	339	678	1
153229	cd03135	GATase1_DJ-1	Type 1 glutamine amidotransferase (GATase1)-like domain found in Human DJ-1.	0	0	339	678	1
153237	cd03143	A4_beta-galactosidase_middle_domain	A4 beta-galactosidase middle domain: a type 1 glutamine amidotransferase (GATase1)-like domain.	0	0	339	678	1
153431	cd07995	TPK	Thiamine pyrophosphokinase.	0	0	339	678	1
161659	TIGR00005	rluA_subfam	pseudouridine synthase, RluA family.	0	0	339	678	1
162098	TIGR00900	2A0121	H+ Antiporter protein.	0	0	339	678	1
162905	TIGR02534	mucon_cyclo	muconate and chloromuconate cycloisomerases.	0	0	339	678	1
163244	TIGR03385	CoA_CoA_reduc	CoA-disulfide reductase.	0	0	339	678	1
163413	TIGR03701	mena_SCO4490	menaquinone biosynthesis decarboxylase, SCO4490 family.	0	0	339	678	1
163492	TIGR03780	Bac_Flav_CT_N	Bacteroides conjugative transposon TraN protein.	0	0	339	678	1
163503	TIGR03791	TTQ_mauG	tryptophan tryptophylquinone biosynthesis enzyme MauG.	0	0	339	678	1
163518	TIGR03806	chp_HNE_0200	conserved hypothetical protein, HNE_0200 family.	0	0	339	678	1
163532	TIGR03820	lys_2_3_AblA	lysine-2,3-aminomutase.	0	0	339	678	1
163539	TIGR03827	GNAT_ablB	putative beta-lysine N-acetyltransferase.	0	0	339	678	1
163708	cd08152	y4iL_like	Catalase-like heme-binding proteins similar to the uncharacterized y4iL.	0	0	339	678	1
165206	PHA02875	PHA02875	ankyrin repeat protein; Provisional	0	0	339	678	1
165207	PHA02876	PHA02876	ankyrin repeat protein; Provisional	0	0	339	678	1
166842	PRK00183	PRK00183	hypothetical protein; Provisional	0	0	339	678	1
166864	PRK00234	PRK00234	Maf-like protein; Reviewed	0	0	339	678	1
168147	PRK05642	PRK05642	DNA replication initiation factor; Validated	0	0	339	678	1
168472	PRK06217	PRK06217	hypothetical protein; Validated	0	0	339	678	1
169406	PRK08366	vorA	2-ketoisovalerate ferredoxin oxidoreductase subunit alpha; Reviewed	0	0	339	678	1
169982	PRK09578	PRK09578	periplasmic multidrug efflux lipoprotein precursor; Reviewed	0	0	339	678	1
170047	PRK09687	PRK09687	putative lyase; Provisional	0	0	339	678	1
171489	PRK12423	PRK12423	LexA repressor; Provisional	0	0	339	678	1
171561	PRK12528	PRK12528	RNA polymerase sigma factor; Provisional	0	0	339	678	1
172536	PRK14042	PRK14042	pyruvate carboxylase subunit B; Provisional	0	0	339	678	1
173534	PTZ00341	PTZ00341	Ring-infected erythrocyte surface antigen; Provisional	0	0	339	678	1
173776	cd01026	TOPRIM_OLD	TOPRIM_OLD: topoisomerase-primase (TOPRIM) nucleotidyl transferase/hydrolase domain of the type found in bacterial and archaeal nucleases of the OLD (overcome lysogenization defect) family.	0	0	339	678	1
173779	cd01029	TOPRIM_primases	TOPRIM_primases: The topoisomerase-primase (TORPIM) nucleotidyl transferase/hydrolase domain found in the active site regions of bacterial DnaG-type primases and their homologs.	0	0	339	678	1
173787	cd00306	Peptidases_S8_S53	Peptidase domain in the S8 and S53 families.	0	0	339	678	1
173794	cd04848	Peptidases_S8_Autotransporter_serine_protease_like	Peptidase S8 family domain in Autotransporter serine proteases.	0	0	339	678	1
173799	cd07473	Peptidases_S8_Subtilisin_like	Peptidase S8 family domain in Subtilisin-like proteins.	0	0	339	678	1
173818	cd07493	Peptidases_S8_9	Peptidase S8 family domain, uncharacterized subfamily 9.	0	0	339	678	1
173822	cd07498	Peptidases_S8_15	Peptidase S8 family domain, uncharacterized subfamily 15.	0	0	339	678	1
173855	cd08490	PBP2_NikA_DppA_OppA_like_3	The substrate-binding component of an uncharacterized ABC-type nickel/dipeptide/oligopeptide-like import system contains the type 2 periplasmic binding fold.	0	0	339	678	1
173862	cd08497	PBP2_NikA_DppA_OppA_like_14	The substrate-binding component of an uncharacterized ABC-type nickel/dipeptide/oligopeptide-like import system contains the type 2 periplasmic binding fold.	0	0	339	678	1
173886	cd01951	lectin_L-type	legume lectins.	0	0	339	678	1
173972	cd08207	RLP_NonPhot	Ribulose bisphosphate carboxylase like proteins from nonphototrophic bacteria.	0	0	339	678	1
176108	cd08416	PBP2_MdcR	The C-terminal substrate-binding domian of LysR-type transcriptional regulator MdcR, which involved in the malonate catabolism contains the type 2 periplasmic binding fold.	0	0	339	678	1
176112	cd08420	PBP2_CysL_like	C-terminal substrate binding domain of LysR-type transcriptional regulator CysL, which activates the transcription of the cysJI operon encoding sulfite reductase, contains the type 2 periplasmic binding fold.	0	0	339	678	1
176113	cd08421	PBP2_LTTR_like_1	The C-terminal substrate binding domain of an uncharacterized LysR-type transcriptional regulator, contains the type 2 periplasmic binding fold.	0	0	339	678	1
176148	cd08459	PBP2_DntR_NahR_LinR_like	The C-terminal substrate binding domain of LysR-type transcriptional regulators that are involved in the catabolism of dinitrotoluene, naphthalene and gamma-hexachlorohexane; contains the type 2 periplasmic binding fold.	0	0	339	678	1
176149	cd08460	PBP2_DntR_like_1	The C-terminal substrate binding domain of an uncharacterized LysR-type transcriptional regulator similar to DntR, which is involved in the catabolism of dinitrotoluene; contains the type 2 periplasmic binding fold.	0	0	339	678	1
176159	cd08470	PBP2_CrgA_like_1	The C-terminal substrate binding domain of an uncharacterized LysR-type transcriptional regulator CrgA-like, contains the type 2 periplasmic binding domain.	0	0	339	678	1
176164	cd08475	PBP2_CrgA_like_6	The C-terminal substrate binding domain of an uncharacterized LysR-type transcriptional regulator CrgA-like, contains the type 2 periplasmic binding fold.	0	0	339	678	1
176183	cd05280	MDR_yhdh_yhfp	Yhdh and yhfp-like putative quinone oxidoreductases.	0	0	339	678	1
176198	cd08236	sugar_DH	NAD(P)-dependent sugar dehydrogenases.	0	0	339	678	1
176214	cd08252	AL_MDR	Arginate lyase and other MDR family members.	0	0	339	678	1
176217	cd08255	2-desacetyl-2-hydroxyethyl_bacteriochlorophyllide_like	2-desacetyl-2-hydroxyethyl bacteriochlorophyllide and other MDR family members.	0	0	339	678	1
176219	cd08258	Zn_ADH4	Alcohol dehydrogenases of the MDR family.	0	0	339	678	1
176234	cd08273	MDR8	Medium chain dehydrogenases/reductase (MDR)/zinc-dependent alcohol dehydrogenase-like family.	0	0	339	678	1
176239	cd08278	benzyl_alcohol_DH	Benzyl alcohol dehydrogenase.	0	0	339	678	1
176257	cd08297	CAD3	Cinnamyl alcohol dehydrogenases (CAD).	0	0	339	678	1
176258	cd08298	CAD2	Cinnamyl alcohol dehydrogenases (CAD).	0	0	339	678	1
176454	cd01700	PolY_Pol_V_umuC	umuC subunit of DNA Polymerase V.	0	0	339	678	1
176458	cd03468	PolY_like	DNA Polymerase Y-family.	0	0	339	678	1
176463	cd01359	Argininosuccinate_lyase	Argininosuccinate lyase (argininosuccinase, ASAL).	0	0	339	678	1
176528	cd08586	PI-PLCc_BcPLC_like	Catalytic domain of Bacillus cereus phosphatidylinositol-specific phospholipases C and similar proteins.	0	0	339	678	1
176544	cd08602	GDPD_ScGlpQ1_like	Glycerophosphodiester phosphodiesterase domain of Streptomycin coelicolor (GlpQ1) and similar proteins.	0	0	339	678	1
176643	cd00865	PEBP_bact_arch	PhosphatidylEthanolamine-Binding Protein (PEBP) domain present in bacteria and archaea.	0	0	339	678	1
176653	cd06141	WRN_exo	DEDDy 3'-5' exonuclease domain of WRN and similar proteins.	0	0	339	678	1
176808	cd08974	BaFpgNei_N_2	Uncharacterized bacterial subgroup of the N-terminal domain of Fpg (formamidopyrimidine-DNA glycosylase, MutM)_Nei (endonuclease VIII) base-excision repair DNA glycosylases.	0	0	339	678	1
176863	cd07821	PYR_PYL_RCAR_like	Pyrabactin resistance 1 (PYR1), PYR1-like (PYL), regulatory component of abscisic acid receptors (RCARs), and related proteins.	0	0	339	678	1
176901	cd08892	SRPBCC_Aha1	Putative hydrophobic ligand-binding SRPBCC domain of the Hsp90 co-chaperone Aha1 and related proteins.	0	0	339	678	1
176910	cd08901	SRPBCC_CalC_Aha1-like_8	Putative hydrophobic ligand-binding SRPBCC domain of an uncharacterized subgroup of CalC- and Aha1-like proteins.	0	0	339	678	1
177082	CHL00180	rbcR	LysR transcriptional regulator; Provisional	0	0	339	678	1
177665	PLN00028	PLN00028	nitrate transmembrane transporter; Provisional	0	0	339	678	1
177681	PLN00049	PLN00049	carboxyl-terminal processing protease; Provisional	0	0	339	678	1
178051	PLN02432	PLN02432	putative pectinesterase	0	0	339	678	1
178504	PLN02916	PLN02916	pectinesterase family protein	0	0	339	678	1
178810	PRK00034	gatC	aspartyl/glutamyl-tRNA amidotransferase subunit C; Reviewed	0	0	339	678	1
178927	PRK00203	rnhA	ribonuclease H; Reviewed	0	0	339	678	1
178960	PRK00284	pqqA	coenzyme PQQ synthesis protein PqqA; Provisional	0	0	339	678	1
178974	PRK00312	pcm	protein-L-isoaspartate O-methyltransferase; Reviewed	0	0	339	678	1
178993	PRK00378	PRK00378	nucleoid-associated protein NdpA; Validated	0	0	339	678	1
179080	PRK00642	PRK00642	inorganic pyrophosphatase; Provisional	0	0	339	678	1
179108	PRK00748	PRK00748	1-(5-phosphoribosyl)-5-[(5-phosphoribosylamino)methylideneamino] imidazole-4-carboxamide isomerase; Validated	0	0	339	678	1
179214	PRK01060	PRK01060	endonuclease IV; Provisional	0	0	339	678	1
179217	PRK01076	PRK01076	L-rhamnose isomerase; Provisional	0	0	339	678	1
179253	PRK01220	PRK01220	malonate decarboxylase subunit delta; Provisional	0	0	339	678	1
179257	PRK01231	ppnK	inorganic polyphosphate/ATP-NAD kinase; Provisional	0	0	339	678	1
179345	PRK01885	greB	transcription elongation factor GreB; Reviewed	0	0	339	678	1
179358	PRK02001	PRK02001	hypothetical protein; Validated	0	0	339	678	1
179399	PRK02260	PRK02260	S-ribosylhomocysteinase; Provisional	0	0	339	678	1
179448	PRK02603	PRK02603	photosystem I assembly protein Ycf3; Provisional	0	0	339	678	1
179615	PRK03634	PRK03634	rhamnulose-1-phosphate aldolase; Provisional	0	0	339	678	1
179781	PRK04200	PRK04200	cofactor-independent phosphoglycerate mutase; Provisional	0	0	339	678	1
179914	PRK05014	hscB	co-chaperone HscB; Provisional	0	0	339	678	1
179964	PRK05208	PRK05208	hypothetical protein; Provisional	0	0	339	678	1
179969	PRK05234	mgsA	methylglyoxal synthase; Validated	0	0	339	678	1
179997	PRK05293	glgC	glucose-1-phosphate adenylyltransferase; Provisional	0	0	339	678	1
180059	PRK05408	PRK05408	oxidative damage protection protein; Provisional	0	0	339	678	1
180121	PRK05508	PRK05508	methionine sulfoxide reductase B; Provisional	0	0	339	678	1
180148	PRK05584	PRK05584	5'-methylthioadenosine/S-adenosylhomocysteine nucleosidase; Validated	0	0	339	678	1
180161	PRK05609	nusG	transcription antitermination protein NusG; Validated	0	0	339	678	1
180188	PRK05664	PRK05664	threonine-phosphate decarboxylase; Reviewed	0	0	339	678	1
180196	PRK05680	flgB	flagellar basal body rod protein FlgB; Reviewed	0	0	339	678	1
180421	PRK06141	PRK06141	ornithine cyclodeaminase; Validated	0	0	339	678	1
180462	PRK06198	PRK06198	short chain dehydrogenase; Provisional	0	0	339	678	1
180488	PRK06249	PRK06249	2-dehydropantoate 2-reductase; Provisional	0	0	339	678	1
180561	PRK06427	PRK06427	bifunctional hydroxy-methylpyrimidine kinase/ hydroxy-phosphomethylpyrimidine kinase; Reviewed	0	0	339	678	1
180614	PRK06546	PRK06546	pyruvate dehydrogenase; Provisional	0	0	339	678	1
180732	PRK06853	PRK06853	indolepyruvate oxidoreductase subunit beta; Reviewed	0	0	339	678	1
180766	PRK06940	PRK06940	short chain dehydrogenase; Provisional	0	0	339	678	1
180789	PRK06997	PRK06997	enoyl-(acyl carrier protein) reductase; Provisional	0	0	339	678	1
180794	PRK07018	flgA	flagellar basal body P-ring biosynthesis protein FlgA; Reviewed	0	0	339	678	1
180800	PRK07030	PRK07030	adenosylmethionine--8-amino-7-oxononanoate transaminase; Provisional	0	0	339	678	1
180838	PRK07102	PRK07102	short chain dehydrogenase; Provisional	0	0	339	678	1
180839	PRK07103	PRK07103	polyketide beta-ketoacyl:acyl carrier protein synthase; Validated	0	0	339	678	1
180842	PRK07107	PRK07107	inosine 5-monophosphate dehydrogenase; Validated	0	0	339	678	1
180958	PRK07396	PRK07396	dihydroxynaphthoic acid synthetase; Validated	0	0	339	678	1
181059	PRK07627	PRK07627	dihydroorotase; Provisional	0	0	339	678	1
181104	PRK07758	PRK07758	hypothetical protein; Provisional	0	0	339	678	1
181156	PRK07878	PRK07878	molybdopterin biosynthesis-like protein MoeZ; Validated	0	0	339	678	1
181254	PRK08150	PRK08150	enoyl-CoA hydratase; Provisional	0	0	339	678	1
181257	PRK08155	PRK08155	acetolactate synthase catalytic subunit; Validated	0	0	339	678	1
181282	PRK08195	PRK08195	4-hyroxy-2-oxovalerate/4-hydroxy-2-oxopentanoic acid aldolase,; Validated	0	0	339	678	1
181323	PRK08250	PRK08250	glutamine amidotransferase; Provisional	0	0	339	678	1
181334	PRK08263	PRK08263	short chain dehydrogenase; Provisional	0	0	339	678	1
181335	PRK08264	PRK08264	short chain dehydrogenase; Validated	0	0	339	678	1
181337	PRK08266	PRK08266	hypothetical protein; Provisional	0	0	339	678	1
181342	PRK08271	PRK08271	anaerobic ribonucleoside triphosphate reductase; Provisional	0	0	339	678	1
181349	PRK08278	PRK08278	short chain dehydrogenase; Provisional	0	0	339	678	1
181535	PRK08673	PRK08673	3-deoxy-7-phosphoheptulonate synthase; Reviewed	0	0	339	678	1
181592	PRK08947	fadA	3-ketoacyl-CoA thiolase; Reviewed	0	0	339	678	1
181598	PRK08965	PRK08965	putative monovalent cation/H+ antiporter subunit E; Reviewed	0	0	339	678	1
181606	PRK08997	PRK08997	isocitrate dehydrogenase; Provisional	0	0	339	678	1
181619	PRK09039	PRK09039	hypothetical protein; Validated	0	0	339	678	1
181624	PRK09050	PRK09050	beta-ketoadipyl CoA thiolase; Validated	0	0	339	678	1
181655	PRK09110	PRK09110	flagellar motor protein MotA; Validated	0	0	339	678	1
181657	PRK09116	PRK09116	3-oxoacyl-(acyl carrier protein) synthase II; Reviewed	0	0	339	678	1
181716	PRK09236	PRK09236	dihydroorotase; Reviewed	0	0	339	678	1
181738	PRK09265	PRK09265	aminotransferase AlaT; Validated	0	0	339	678	1
181762	PRK09291	PRK09291	short chain dehydrogenase; Provisional	0	0	339	678	1
181765	PRK09294	PRK09294	acyltransferase PapA5; Provisional	0	0	339	678	1
181879	PRK09464	pdhR	transcriptional regulator PdhR; Reviewed	0	0	339	678	1
181942	PRK09547	nhaB	sodium/proton antiporter; Reviewed	0	0	339	678	1
182015	PRK09646	PRK09646	RNA polymerase sigma factor SigK; Reviewed	0	0	339	678	1
182089	PRK09812	PRK09812	toxin ChpB; Provisional	0	0	339	678	1
182137	PRK09906	PRK09906	DNA-binding transcriptional regulator HcaR; Provisional	0	0	339	678	1
182169	PRK09959	PRK09959	hybrid sensory histidine kinase in two-component regulatory system with EvgA; Provisional	0	0	339	678	1
182183	PRK09986	PRK09986	DNA-binding transcriptional activator XapR; Provisional	0	0	339	678	1
182228	PRK10082	PRK10082	cell density-dependent motility repressor; Provisional	0	0	339	678	1
182231	PRK10086	PRK10086	DNA-binding transcriptional regulator DsdC; Provisional	0	0	339	678	1
182234	PRK10091	PRK10091	MFS transport protein AraJ; Provisional	0	0	339	678	1
182299	PRK10199	PRK10199	alkaline phosphatase isozyme conversion aminopeptidase; Provisional	0	0	339	678	1
182318	PRK10225	PRK10225	DNA-binding transcriptional repressor UxuR; Provisional	0	0	339	678	1
182341	PRK10260	PRK10260	L,D-transpeptidase; Provisional	0	0	339	678	1
182353	PRK10280	PRK10280	dipeptidyl carboxypeptidase II; Provisional	0	0	339	678	1
182354	PRK10281	PRK10281	hypothetical protein; Provisional	0	0	339	678	1
182488	PRK10476	PRK10476	multidrug resistance protein MdtN; Provisional	0	0	339	678	1
182507	PRK10510	PRK10510	putative outer membrane lipoprotein; Provisional	0	0	339	678	1
182522	PRK10529	PRK10529	DNA-binding transcriptional activator KdpE; Provisional	0	0	339	678	1
182534	PRK10543	PRK10543	superoxide dismutase; Provisional	0	0	339	678	1
182541	PRK10551	PRK10551	phage resistance protein; Provisional	0	0	339	678	1
182640	PRK10676	PRK10676	DNA-binding transcriptional regulator ModE; Provisional	0	0	339	678	1
182669	PRK10714	PRK10714	undecaprenyl phosphate 4-deoxy-4-formamido-L-arabinose transferase; Provisional	0	0	339	678	1
182672	PRK10717	PRK10717	cysteine synthase A; Provisional	0	0	339	678	1
182682	PRK10729	nudF	ADP-ribose pyrophosphatase NudF; Provisional	0	0	339	678	1
182692	PRK10744	pstB	phosphate transporter ATP-binding protein; Provisional	0	0	339	678	1
182726	PRK10782	PRK10782	DL-methionine transporter permease subunit; Provisional	0	0	339	678	1
182805	PRK10880	PRK10880	adenine DNA glycosylase; Provisional	0	0	339	678	1
182814	PRK10892	PRK10892	D-arabinose 5-phosphate isomerase; Provisional	0	0	339	678	1
182828	PRK10907	PRK10907	intramembrane serine protease GlpG; Provisional	0	0	339	678	1
182878	PRK10976	PRK10976	putative hydrolase; Provisional	0	0	339	678	1
182885	PRK10991	fucI	L-fucose isomerase; Provisional	0	0	339	678	1
182909	PRK11025	PRK11025	23S rRNA pseudouridylate synthase C; Provisional	0	0	339	678	1
182918	PRK11036	PRK11036	putative S-adenosyl-L-methionine-dependent methyltransferase; Provisional	0	0	339	678	1
182929	PRK11053	PRK11053	dihydropteridine reductase; Provisional	0	0	339	678	1
182930	PRK11054	helD	DNA helicase IV; Provisional	0	0	339	678	1
182940	PRK11064	wecC	UDP-N-acetyl-D-mannosamine dehydrogenase; Provisional	0	0	339	678	1
182974	PRK11115	PRK11115	transcriptional regulator PhoU; Provisional	0	0	339	678	1
183004	PRK11161	PRK11161	fumarate/nitrate reduction transcriptional regulator; Provisional	0	0	339	678	1
183033	PRK11197	lldD	L-lactate dehydrogenase; Provisional	0	0	339	678	1
183049	PRK11240	PRK11240	penicillin-binding protein 1C; Provisional	0	0	339	678	1
183080	PRK11300	livG	leucine/isoleucine/valine transporter ATP-binding subunit; Provisional	0	0	339	678	1
183082	PRK11302	PRK11302	DNA-binding transcriptional regulator HexR; Provisional	0	0	339	678	1
183085	PRK11316	PRK11316	bifunctional heptose 7-phosphate kinase/heptose 1-phosphate adenyltransferase; Provisional	0	0	339	678	1
183096	PRK11357	frlA	putative fructoselysine transporter; Provisional	0	0	339	678	1
183097	PRK11359	PRK11359	cyclic-di-GMP phosphodiesterase; Provisional	0	0	339	678	1
183194	PRK11556	PRK11556	multidrug efflux system subunit MdtA; Provisional	0	0	339	678	1
183229	PRK11611	PRK11611	enhanced serine sensitivity protein SseB; Provisional	0	0	339	678	1
183282	PRK11705	PRK11705	cyclopropane fatty acyl phospholipid synthase; Provisional	0	0	339	678	1
183283	PRK11706	PRK11706	TDP-4-oxo-6-deoxy-D-glucose transaminase; Provisional	0	0	339	678	1
183285	PRK11712	PRK11712	ribonuclease G; Provisional	0	0	339	678	1
183293	PRK11730	fadB	multifunctional fatty acid oxidation complex subunit alpha; Reviewed	0	0	339	678	1
183365	PRK11895	ilvH	acetolactate synthase 3 regulatory subunit; Reviewed	0	0	339	678	1
183384	PRK11924	PRK11924	RNA polymerase sigma factor; Provisional	0	0	339	678	1
183450	PRK12335	PRK12335	tellurite resistance protein TehB; Provisional	0	0	339	678	1
183576	PRK12534	PRK12534	RNA polymerase sigma factor; Provisional	0	0	339	678	1
183678	PRK12681	cysB	transcriptional regulator CysB; Reviewed	0	0	339	678	1
183716	PRK12744	PRK12744	short chain dehydrogenase; Provisional	0	0	339	678	1
183782	PRK12834	PRK12834	putative FAD-binding dehydrogenase; Reviewed	0	0	339	678	1
183886	PRK13192	PRK13192	bifunctional urease subunit gamma/beta; Reviewed	0	0	339	678	1
183913	PRK13241	ureA	urease subunit gamma; Provisional	0	0	339	678	1
184052	PRK13435	PRK13435	response regulator; Provisional	0	0	339	678	1
184056	PRK13446	atpC	F0F1 ATP synthase subunit epsilon; Provisional	0	0	339	678	1
184080	PRK13483	PRK13483	enterobactin receptor protein; Provisional	0	0	339	678	1
184134	PRK13549	PRK13549	xylose transporter ATP-binding subunit; Provisional	0	0	339	678	1
184143	PRK13561	PRK13561	putative diguanylate cyclase; Provisional	0	0	339	678	1
184239	PRK13682	PRK13682	hypothetical protein; Provisional	0	0	339	678	1
184320	PRK13778	paaA	phenylacetate-CoA oxygenase subunit PaaA; Provisional	0	0	339	678	1
184455	PRK14017	PRK14017	galactonate dehydratase; Provisional	0	0	339	678	1
184504	PRK14097	pgi	glucose-6-phosphate isomerase; Provisional	0	0	339	678	1
184516	PRK14115	gpmA	phosphoglyceromutase; Provisional	0	0	339	678	1
184695	PRK14471	PRK14471	F0F1 ATP synthase subunit B; Provisional	0	0	339	678	1
184703	PRK14485	PRK14485	putative bifunctional cbb3-type cytochrome c oxidase subunit I/II; Provisional	0	0	339	678	1
184704	PRK14486	PRK14486	putative bifunctional cbb3-type cytochrome c oxidase subunit II/cytochrome c; Provisional	0	0	339	678	1
184753	PRK14581	hmsF	outer membrane N-deacetylase; Provisional	0	0	339	678	1
184754	PRK14582	pgaB	outer membrane N-deacetylase; Provisional	0	0	339	678	1
184791	PRK14686	PRK14686	hypothetical protein; Provisional	0	0	339	678	1
184853	PRK14851	PRK14851	hypothetical protein; Provisional	0	0	339	678	1
184875	PRK14875	PRK14875	acetoin dehydrogenase E2 subunit dihydrolipoyllysine-residue acetyltransferase; Provisional	0	0	339	678	1
184951	PRK14989	PRK14989	nitrite reductase subunit NirD; Provisional	0	0	339	678	1
184963	PRK15001	PRK15001	SAM-dependent 23S ribosomal RNA mG1835 methyltransferase; Provisional	0	0	339	678	1
184990	PRK15030	PRK15030	multidrug efflux system transporter AcrA; Provisional	0	0	339	678	1
185001	PRK15041	PRK15041	methyl-accepting chemotaxis protein I; Provisional	0	0	339	678	1
185008	PRK15048	PRK15048	methyl-accepting chemotaxis protein II; Provisional	0	0	339	678	1
185016	PRK15056	PRK15056	manganese/iron transporter ATP-binding protein; Provisional	0	0	339	678	1
185219	PRK15319	PRK15319	AIDA autotransporter-like protein ShdA; Provisional	0	0	339	678	1
185285	PRK15387	PRK15387	E3 ubiquitin-protein ligase SspH2; Provisional	0	0	339	678	1
185292	PRK15394	PRK15394	4-deoxy-4-formamido-L-arabinose-phosphoundecaprenol deformylase ArnD; Provisional	0	0	339	678	1
185300	PRK15402	PRK15402	multidrug efflux system translocase MdfA; Provisional	0	0	339	678	1
185319	PRK15421	PRK15421	DNA-binding transcriptional regulator MetR; Provisional	0	0	339	678	1
185635	PTZ00456	PTZ00456	acyl-CoA dehydrogenase; Provisional	0	0	339	678	1
185695	cd01081	Aldose_epim	aldose 1-epimerase superfamily.	0	0	339	678	1
185697	cd09020	D-hex-6-P-epi_like	D-hexose-6-phosphate epimerase-like.	0	0	339	678	1
185698	cd09021	Aldose_epim_Ec_YphB	aldose 1-epimerase, similar to Escherichia coli YphB.	0	0	339	678	1
185701	cd09024	Aldose_epim_lacX	Aldose 1-epimerase, similar to Lactococcus lactis lacX.	0	0	339	678	1
185753	cd09214	GH64-like	glycosyl hydrolase 64 family.	0	0	339	678	1
187539	cd05228	AR_FR_like_1_SDR_e	uncharacterized subgroup of aldehyde reductase and flavonoid reductase related proteins, extended (e) SDRs.	0	0	339	678	1
187553	cd05242	SDR_a8	atypical (a) SDRs, subgroup 8.	0	0	339	678	1
187559	cd05248	ADP_GME_SDR_e	ADP-L-glycero-D-mannoheptose 6-epimerase (GME), extended (e) SDRs.	0	0	339	678	1
187560	cd05250	CC3_like_SDR_a	CC3(TIP30)-like, atypical (a) SDRs.	0	0	339	678	1
187562	cd05252	CDP_GD_SDR_e	CDP-D-glucose 4,6-dehydratase, extended (e) SDRs.	0	0	339	678	1
187576	cd05266	SDR_a4	atypical (a) SDRs, subgroup 4.	0	0	339	678	1
187578	cd05269	TMR_SDR_a	triphenylmethane reductase (TMR)-like proteins, NMRa-like, atypical (a) SDRs.	0	0	339	678	1
187580	cd05272	TDH_SDR_e	L-threonine dehydrogenase, extended (e) SDRs.	0	0	339	678	1
187585	cd05324	carb_red_PTCR-like_SDR_c	Porcine testicular carbonyl reductase (PTCR)-like, classical (c) SDRs.	0	0	339	678	1
187593	cd05332	11beta-HSD1_like_SDR_c	11beta-hydroxysteroid dehydrogenase type 1 (11beta-HSD1)-like, classical (c) SDRs.	0	0	339	678	1
187602	cd05344	BKR_like_SDR_like	putative beta-ketoacyl acyl carrier protein [ACP] reductase (BKR)-like, SDR.	0	0	339	678	1
187613	cd05355	SDR_c1	classical (c) SDR, subgroup 1.	0	0	339	678	1
187616	cd05358	GlcDH_SDR_c	glucose 1 dehydrogenase (GlcDH), classical (c) SDRs.	0	0	339	678	1
187629	cd05371	HSD10-like_SDR_c	17hydroxysteroid dehydrogenase type 10 (HSD10)-like, classical (c) SDRs.	0	0	339	678	1
187658	cd08955	KR_2_FAS_SDR_x	beta-ketoacyl reductase (KR) domain of fatty acid synthase (FAS), subgroup 2, complex (x).	0	0	339	678	1
187677	cd09619	CBM9_like_4	DOMON-like type 9 carbohydrate binding module.	0	0	339	678	1
187857	cd09726	RAMP_I_III	CRISPR/Cas system-associated RAMP superfamily protein.	0	0	339	678	1
187969	cl11894	Csp2_I-U	CRISPR/Cas system-associated protein Cas8c.	0	0	339	678	1
187970	cl11895	Cas5_I	CRISPR/Cas system-associated RAMP superfamily protein Cas5.	0	0	339	678	1
188170	TIGR01832	kduD	2-deoxy-D-gluconate 3-dehydrogenase.	0	0	339	678	1
188237	TIGR02634	xylF	D-xylose ABC transporter, substrate-binding protein.	0	0	339	678	1
188306	TIGR03319	RNase_Y	ribonuclease Y.	0	0	339	678	1
188316	TIGR03414	ABC_choline_bnd	choline ABC transporter, periplasmic binding protein.	0	0	339	678	1
188318	TIGR03416	ABC_choXWV_perm	choline ABC transporter, permease protein.	0	0	339	678	1
188457	TIGR03942	sulfatase_rSAM	anaerobic sulfatase-maturating enzyme.	0	0	339	678	1
188463	TIGR03948	butyr_acet_CoA	butyryl-CoA:acetate CoA-transferase.	0	0	339	678	1
188632	cd00452	KDPG_aldolase	KDPG and KHG aldolase.	0	0	339	678	1
188646	cd00959	DeoC	2-deoxyribose-5-phosphate aldolase (DERA) of the DeoC family.	0	0	339	678	1
197216	cd09117	PLDc_Bfil_DEXD_like	Catalytic domain of type II restriction endonucleases BfiI and NgoFVII, and uncharacterized proteins with a DEAD domain.	0	0	339	678	1
197226	cd09128	PLDc_unchar1_2	Putative catalytic domain, repeat 2, of uncharacterized phospholipase D-like proteins.	0	0	339	678	1
197298	cd09204	PLDc_N_DEXD_b2	N-terminal putative catalytic domain of uncharacterized prokaryotic and archeal HKD family nucleases fused to a DEAD/DEAH box helicase domain.	0	0	339	678	1
197320	cd09086	ExoIII-like_AP-endo	Escherichia coli exonuclease III (ExoIII) and Neisseria meningitides NExo-like subfamily of the ExoIII family purinic/apyrimidinic (AP) endonucleases.	0	0	339	678	1
197321	cd09087	Ape1-like_AP-endo	Human Ape1-like subfamily of the ExoIII family purinic/apyrimidinic (AP) endonucleases.	0	0	339	678	1
197609	smart00257	LysM	Lysin motif.	0	0	339	678	1
197836	smart00704	ZnF_CDGSH	CDGSH-type zinc finger.	0	0	339	678	1
198033	smart00965	STN	Secretin and TonB N terminus short domain.	0	0	339	678	1
198079	smart01011	AMP_N	Aminopeptidase P, N-terminal domain.	0	0	339	678	1
198349	cd07771	FGGY_RhuK	L-rhamnulose kinases; a subfamily of the FGGY family of carbohydrate kinases.	0	0	339	678	1
198394	cd10447	GIY-YIG_unchar_2	GIY-YIG domain of uncharacterized hypothetical protein found in bacteria and archaea.	0	0	339	678	1
198403	cd10456	GIY-YIG_UPF0213	The GIY-YIG domain of uncharacterized protein family UPF0213 related to structure-specific endonuclease SLX1.	0	0	339	678	1
198426	cd10028	UDG_F2_MUG	G:T/U mismatch specific DNA glcosylase (MUG).	0	0	339	678	1
199214	cd10146	LabA_like_C	C-terminal domain of LabA_like proteins.	0	0	339	678	1
199215	cd10315	CBM41_pullulanase	Family 41 Carbohydrate-Binding Module from pullulanase-like enzymes.	0	0	339	678	1
199838	cd10280	PQQ_mGDH	Membrane-bound PQQ-dependent glucose dehydrogenase.	0	0	339	678	1
199882	cd02851	E_set_GO_C	C-terminal Early set domain associated with the catalytic domain of galactose oxidase.	0	0	339	678	1
199885	cd02855	E_set_GBE_prok_N	N-terminal Early set domain associated with the catalytic domain of prokaryotic glycogen branching enzyme.	0	0	339	678	1
199904	cd10316	RGL4_M	Middle domain of rhamnogalacturonan lyase, a family 4 polysaccharide lyase.	0	0	339	678	1
199905	cd10317	RGL4_C	C-terminal domain of rhamnogalacturonan lyase, a family 4 polysaccharide lyase.	0	0	339	678	1
199907	cd10320	RGL4_N	N-terminal catalytic domain of rhamnogalacturonan lyase, a family 4 polysaccharide lyase.	0	0	339	678	1
200384	TIGR04133	rSAM_w_lipo	radical SAM enzyme, rSAM/lipoprotein system.	0	0	339	678	1
200420	TIGR04169	perox_w_seleSAM	alkylhydroperoxidase/carboxymuconolactone decarboxylase family protein.	0	0	339	678	1
200452	cd11313	AmyAc_arch_bac_AmyA	Alpha amylase catalytic domain found in archaeal and bacterial Alpha-amylases (also called 1,4-alpha-D-glucan-4-glucanohydrolase).	0	0	339	678	1
200453	cd11314	AmyAc_arch_bac_plant_AmyA	Alpha amylase catalytic domain found in archaeal, bacterial, and plant Alpha-amylases (also called 1,4-alpha-D-glucan-4-glucanohydrolase).	0	0	339	678	1
200464	cd11325	AmyAc_GTHase	Alpha amylase catalytic domain found in Glycosyltrehalose trehalohydrolase (also called Maltooligosyl trehalose Trehalohydrolase).	0	0	339	678	1
200470	cd11331	AmyAc_OligoGlu_like	Alpha amylase catalytic domain found in oligo-1,6-glucosidase (also called isomaltase; sucrase-isomaltase; alpha-limit dextrinase) and related proteins.	0	0	339	678	1
200472	cd11333	AmyAc_SI_OligoGlu_DGase	Alpha amylase catalytic domain found in Sucrose isomerases, oligo-1,6-glucosidase (also called isomaltase; sucrase-isomaltase; alpha-limit dextrinase), dextran glucosidase (also called glucan 1,6-alpha-glucosidase), and related proteins.	0	0	339	678	1
200477	cd11338	AmyAc_CMD	Alpha amylase catalytic domain found in cyclomaltodextrinases and related proteins.	0	0	339	678	1
200482	cd11344	AmyAc_GlgE_like	Alpha amylase catalytic domain found in GlgE-like proteins.	0	0	339	678	1
200570	cd10946	CE4_Mll8295_like	Putative catalytic NodB homology domain of uncharacterized Mll8295 protein encoded from Rhizobium loti and its bacterial homologs.	0	0	339	678	1
200584	cd10962	CE4_GT2-like	Catalytic NodB homology domain of uncharacterized bacterial glycosyl transferase, group 2-like family proteins.	0	0	339	678	1
200585	cd10963	CE4_RC0012_like	Putative catalytic NodB homology domain of uncharacterized protein RC0012 from Rickettsia conorii and its bacterial homologs.	0	0	339	678	1
200589	cd10967	CE4_GLA_like_6s	Putative catalytic NodB homology domain of gellan lyase and similar proteins.	0	0	339	678	1
200601	cd10979	CE4_PuuE_like	Putative catalytic domain of uncharacterized prokaryotic polysaccharide deacetylases similar to bacterial PuuE allantoinases.	0	0	339	678	1
206640	cd00154	Rab	Ras-related in brain (Rab) family of small guanosine triphosphatases (GTPases).	0	0	339	678	1
211380	cd10981	ZnPC_S1P1	Zinc dependent phospholipase C/S1-P1 nuclease.	0	0	339	678	1
211400	cd11524	SYLF	The SYLF domain (also called DUF500), a novel lipid-binding module.	0	0	339	678	1
211420	cd11579	Glyco_tran_WbsX	Glycosyl hydrolase family 99-like domain of WbsX-like glycosyltransferases.	0	0	339	678	1
211578	TIGR00497	hsdM	type I restriction system adenine methylase (hsdM).	0	0	339	678	1
211705	TIGR01963	PHB_DH	3-hydroxybutyrate dehydrogenase.	0	0	339	678	1
211789	TIGR03137	AhpC	peroxiredoxin.	0	0	339	678	1
211916	TIGR04193	SPASM_w_grasp	SPASM domain peptide maturase, grasp-with-spasm system.	0	0	339	678	1
211988	TIGR04265	bac_cardiolipin	cardiolipin synthase.	0	0	339	678	1
212109	cd10797	GH57N_APU_like_1	N-terminal putative catalytic domain of mainly uncharacterized prokaryotic proteins similar to archaeal thermoactive amylopullulanases; glycoside hydrolase family 57 (GH57).	0	0	339	678	1
212112	cd10801	LamB_YcsF_like_1	uncharacterized proteins similar to the Aspergillus nidulans lactam utilization protein LamB.	0	0	339	678	1
212113	cd10802	YdjC_TTHB029_like	Thermus thermophiles TTHB029 and similar proteins.	0	0	339	678	1
212141	cd11534	NTP-PPase_HisIE_like	Nucleoside Triphosphate Pyrophosphohydrolase (EC 3.	0	0	339	678	1
212144	cd11537	NTP-PPase_RS21-C6_like	Nucleoside Triphosphate Pyrophosphohydrolase (EC 3.	0	0	339	678	1
212145	cd11538	NTP-PPase_u1	Nucleoside Triphosphate Pyrophosphohydrolase (EC 3.	0	0	339	678	1
212150	cd11543	NTP-PPase_u6	Nucleoside Triphosphate Pyrophosphohydrolase EC 3.	0	0	339	678	1
212497	cd11731	Lin1944_like_SDR_c	Lin1944 and related proteins, classical (c) SDRs.	0	0	339	678	1
212500	cd11641	Precorrin-4_C11-MT	Precorrin-4 C11-methyltransferase (CbiF/CobM).	0	0	339	678	1
212503	cd11644	Precorrin-6Y-methylase	Precorrin-6Y methyltransferase, the cobalamin biosynthesis enzyme CbiE.	0	0	339	678	1
212504	cd11645	Precorrin_2_C20_MT	Precorrin-2 C20-methyltransferase, also named CobI or CbiL.	0	0	339	678	1
212505	cd11646	Precorrin_3B_C17_MT	Precorrin-3B C(17)-methyltransferase (CobJ/CbiH).	0	0	339	678	1
212515	cd09989	Arginase	Arginase family.	0	0	339	678	1
212518	cd09992	HDAC_classII	Histone deacetylases and histone-like deacetylases, classII.	0	0	339	678	1
212521	cd09996	HDAC_classII_1	Histone deacetylases and histone-like deacetylases, classII.	0	0	339	678	1
212523	cd09999	Arginase-like_1	Arginase-like amidino hydrolase family.	0	0	339	678	1
212525	cd10001	HDAC_classII_APAH	Histone deacetylase class IIa.	0	0	339	678	1
212538	cd11592	Agmatinase_PAH	Agmatinase-like family includes proclavaminic acid amidinohydrolase.	0	0	339	678	1
212659	cd07770	FGGY_GntK	Gluconate kinases; a subfamily of the FGGY family of carbohydrate kinases.	0	0	339	678	1
212669	cd10227	ParM_like	Plasmid segregation protein ParM and similar proteins.	0	0	339	678	1
212673	cd10231	YegD_like	Escherichia coli YegD, a putative chaperone protein, and related proteins.	0	0	339	678	1
213187	cd03220	ABC_KpsT_Wzt	ATP-binding cassette component of polysaccharide transport system.	0	0	339	678	1
213228	cd03261	ABC_Org_Solvent_Resistant	ATP-binding cassette transport system involved in resistant to organic solvents.	0	0	339	678	1
213250	cd03283	ABC_MutS-like	ATP-binding cassette domain of MutS-like homolog.	0	0	339	678	1
213260	cd03293	ABC_NrtD_SsuB_transporters	ATP-binding cassette domain of the nitrate and sulfonate transporters.	0	0	339	678	1
213361	cd12827	EcCorA_ZntB-like_u2	uncharacterized bacterial subfamily of the Escherichia coli CorA-Salmonella typhimurium ZntB family.	0	0	339	678	1
213364	cd12830	MtCorA-like	Mycobacterium tuberculosis CorA-like subfamily.	0	0	339	678	1
213366	cd12832	TmCorA-like_u3	Uncharacterized subfamily of the Thermotoga maritima CorA-like family.	0	0	339	678	1
213673	TIGR02009	PGMB-YQAB-SF	beta-phosphoglucomutase family hydrolase.	0	0	339	678	1
213698	TIGR02295	HpaD	3,4-dihydroxyphenylacetate 2,3-dioxygenase.	0	0	339	678	1
213736	TIGR02773	addB_Gpos	helicase-exonuclease AddAB, AddB subunit.	0	0	339	678	1
213747	TIGR02869	spore_SleB	spore cortex-lytic enzyme.	0	0	339	678	1
213786	TIGR03221	muco_delta	muconolactone delta-isomerase.	0	0	339	678	1
213799	TIGR03344	VI_effect_Hcp1	type VI secretion system effector, Hcp1 family.	0	0	339	678	1
213852	TIGR03707	PPK2_P_aer	polyphosphate kinase 2, PA0141 family.	0	0	339	678	1
213947	TIGR04334	rSAM_Clo7bot	radical SAM/SPASM domain Clo7bot peptide maturase.	0	0	339	678	1
213982	cd12107	Hemerythrin	Hemerythrin.	0	0	339	678	1
213991	cd07436	PHP_PolX	Polymerase and Histidinol Phosphatase domain of bacterial polymerase X.	0	0	339	678	1
214015	cd12871	Bacuni_01323_like	Uncharacterized protein conserved in Bacteroidetes.	0	0	339	678	1
214364	CHL00100	ilvH	acetohydroxyacid synthase small subunit	0	0	339	678	1
214372	CHL00131	ycf16	sulfate ABC transporter protein; Validated	0	0	339	678	1
214471	smart00014	acidPPc	Acid phosphatase homologues.	0	0	339	678	1
214483	smart00042	CUB	Domain first found in C1r, C1s, uEGF, and bone morphogenetic protein.	0	0	339	678	1
214576	smart00235	ZnMc	Zinc-dependent metalloprotease.	0	0	339	678	1
214600	smart00287	SH3b	Bacterial SH3 domain homologues.	0	0	339	678	1
214614	smart00317	SET	SET (Su(var)3-9, Enhancer-of-zeste, Trithorax) domain.	0	0	339	678	1
214644	smart00388	HisKA	His Kinase A (phosphoacceptor) domain.	0	0	339	678	1
214659	smart00433	TOP2c	TopoisomeraseII.	0	0	339	678	1
214668	smart00448	REC	cheY-homologous receiver domain.	0	0	339	678	1
214682	smart00475	53EXOc	5'-3' exonuclease.	0	0	339	678	1
214719	smart00554	FAS1	Four repeated domains in the Fasciclin I family of proteins, present in many other contexts.	0	0	339	678	1
214740	smart00602	VPS10	VPS10 domain.	0	0	339	678	1
214772	smart00671	SEL1	Sel1-like repeats.	0	0	339	678	1
214795	smart00736	CADG	Dystroglycan-type cadherin-like domains.	0	0	339	678	1
214800	smart00748	HEPN	Higher Eukarytoes and Prokaryotes Nucleotide-binding domain.	0	0	339	678	1
214834	smart00823	PKS_PP	Phosphopantetheine attachment site.	0	0	339	678	1
214838	smart00827	PKS_AT	Acyl transferase domain in polyketide synthase (PKS) enzymes.	0	0	339	678	1
214861	smart00857	Resolvase	Resolvase, N terminal domain.	0	0	339	678	1
214864	smart00860	SMI1_KNR4	SMI1 / KNR4 family.	0	0	339	678	1
214870	smart00867	YceI	YceI-like domain.	0	0	339	678	1
214880	smart00880	CHAD	The CHAD domain is an alpha-helical domain functionally associated with some members of the adenylate cyclase family.	0	0	339	678	1
214898	smart00901	FRG	This domain contains a conserved N-terminal (F/Y)RG motif.	0	0	339	678	1
214900	smart00903	Flavin_Reduct	Flavin reductase like domain.	0	0	339	678	1
214906	smart00910	HIRAN	The HIRAN protein (HIP116, Rad5p N-terminal) is found in the N-terminal regions of the SWI2/SNF2 proteins typified by HIP116 and Rad5p.	0	0	339	678	1
214939	smart00960	Robl_LC7	Roadblock/LC7 domain.	0	0	339	678	1
214943	smart00967	SpoU_sub_bind	RNA 2'-O ribose methyltransferase substrate binding.	0	0	339	678	1
214947	smart00974	T5orf172	This entry represents the putative helicase A859L.	0	0	339	678	1
215006	smart01065	CBM_2	Starch binding domain.	0	0	339	678	1
215016	smart01080	CHASE2	CHASE2 is an extracellular sensory domain, which is present in various classes of transmembrane receptors that are parts of signal transduction pathways in bacteria.	0	0	339	678	1
215071	PLN00137	PLN00137	NHAD transporter family protein; Provisional	0	0	339	678	1
215135	PLN02244	PLN02244	tocopherol O-methyltransferase	0	0	339	678	1
215148	PLN02264	PLN02264	lipoxygenase	0	0	339	678	1
215211	PLN02371	PLN02371	phosphoglucosamine mutase family protein	0	0	339	678	1
215246	PLN02447	PLN02447	1,4-alpha-glucan-branching enzyme	0	0	339	678	1
215257	PLN02464	PLN02464	glycerol-3-phosphate dehydrogenase	0	0	339	678	1
215358	PLN02666	PLN02666	5-oxoprolinase	0	0	339	678	1
215366	PLN02681	PLN02681	proline dehydrogenase	0	0	339	678	1
215408	PLN02763	PLN02763	hydrolase, hydrolyzing O-glycosyl compounds	0	0	339	678	1
215425	PLN02791	PLN02791	Nudix hydrolase homolog	0	0	339	678	1
215461	PLN02856	PLN02856	fumarylacetoacetase	0	0	339	678	1
215463	PLN02858	PLN02858	fructose-bisphosphate aldolase	0	0	339	678	1
215513	PLN02951	PLN02951	Molybderin biosynthesis protein CNX2	0	0	339	678	1
215625	PLN03192	PLN03192	Voltage-dependent potassium channel; Provisional	0	0	339	678	1
222856	PHA02530	pseT	polynucleotide kinase; Provisional	0	0	339	678	1
222890	PHA02584	34	long tail fiber, proximal subunit; Provisional	0	0	339	678	1
222939	PHA02878	PHA02878	ankyrin repeat protein; Provisional	0	0	339	678	1
223107	COG0028	IlvB	Acetolactate synthase large subunit or other thiamine pyrophosphate-requiring enzyme [Amino acid transport and metabolism, Coenzyme transport and metabolism].	0	0	339	678	1
223109	COG0030	RsmA	16S rRNA A1518 and A1519 N6-dimethyltransferase RsmA/KsgA/DIM1 (may also have DNA glycosylase/AP lyase activity) [Translation, ribosomal structure and biogenesis].	0	0	339	678	1
223117	COG0039	Mdh	Malate/lactate dehydrogenase [Energy production and conversion].	0	0	339	678	1
223153	COG0075	PucG	Archaeal aspartate aminotransferase or a related aminotransferase, includes purine catabolism protein PucG [Amino acid transport and metabolism, Nucleotide transport and metabolism].	0	0	339	678	1
223164	COG0086	RpoC	DNA-directed RNA polymerase, beta' subunit/160 kD subunit [Transcription].	0	0	339	678	1
223179	COG0101	TruA	tRNA U38,U39,U40 pseudouridine synthase TruA [Translation, ribosomal structure and biogenesis].	0	0	339	678	1
223193	COG0115	IlvE	Branched-chain amino acid aminotransferase/4-amino-4-deoxychorismate lyase [Amino acid transport and metabolism, Coenzyme transport and metabolism].	0	0	339	678	1
223194	COG0116	RlmL	23S rRNA G2445 N2-methylase RlmL [Translation, ribosomal structure and biogenesis].	0	0	339	678	1
223200	COG0122	AlkA	3-methyladenine DNA glycosylase/8-oxoguanine DNA glycosylase [Replication, recombination and repair].	0	0	339	678	1
223203	COG0125	Tmk	Thymidylate kinase [Nucleotide transport and metabolism].	0	0	339	678	1
223210	COG0132	BioD	Dethiobiotin synthetase [Coenzyme transport and metabolism].	0	0	339	678	1
223217	COG0139	HisI1	Phosphoribosyl-AMP cyclohydrolase [Amino acid transport and metabolism].	0	0	339	678	1
223232	COG0154	GatA	Asp-tRNAAsn/Glu-tRNAGln amidotransferase A subunit or related amidase [Translation, ribosomal structure and biogenesis].	0	0	339	678	1
223246	COG0168	TrkG	Trk-type K+ transport system, membrane component [Inorganic ion transport and metabolism].	0	0	339	678	1
223282	COG0204	PlsC	1-acyl-sn-glycerol-3-phosphate acyltransferase [Lipid transport and metabolism].	0	0	339	678	1
223314	COG0236	AcpP	Acyl carrier protein [Lipid transport and metabolism, Secondary metabolites biosynthesis, transport and catabolism].	0	0	339	678	1
223317	COG0239	CrcB	Fluoride ion exporter CrcB/FEX, affects chromosome condensation [Cell cycle control, cell division, chromosome partitioning, Inorganic ion transport and metabolism].	0	0	339	678	1
223343	COG0265	DegQ	Periplasmic serine protease, S1-C subfamily, contain C-terminal PDZ domain [Posttranslational modification, protein turnover, chaperones].	0	0	339	678	1
223359	COG0282	AckA	Acetate kinase [Energy production and conversion].	0	0	339	678	1
223364	COG0287	TyrA	Prephenate dehydrogenase [Amino acid transport and metabolism].	0	0	339	678	1
223372	COG0295	Cdd	Cytidine deaminase [Nucleotide transport and metabolism].	0	0	339	678	1
223391	COG0314	MoaE	Molybdopterin synthase catalytic subunit [Coenzyme transport and metabolism].	0	0	339	678	1
223395	COG0318	CaiC	Acyl-CoA synthetase (AMP-forming)/AMP-acid ligase II [Lipid transport and metabolism, Secondary metabolites biosynthesis, transport and catabolism].	0	0	339	678	1
223399	COG0322	UvrC	Excinuclease UvrABC, nuclease subunit [Replication, recombination and repair].	0	0	339	678	1
223406	COG0329	DapA	Dihydrodipicolinate synthase/N-acetylneuraminate lyase [Amino acid transport and metabolism, Cell wall/membrane/envelope biogenesis].	0	0	339	678	1
223407	COG0330	HflC	Regulator of protease activity HflC, stomatin/prohibitin superfamily [Posttranslational modification, protein turnover, chaperones].	0	0	339	678	1
223417	COG0340	BirA2	Biotin-(acetyl-CoA carboxylase) ligase [Coenzyme transport and metabolism].	0	0	339	678	1
223422	COG0345	ProC	Pyrroline-5-carboxylate reductase [Amino acid transport and metabolism].	0	0	339	678	1
223442	COG0365	Acs	Acyl-coenzyme A synthetase/AMP-(fatty) acid ligase [Lipid transport and metabolism].	0	0	339	678	1
223446	COG0369	CysJ	Sulfite reductase, alpha subunit (flavoprotein) [Inorganic ion transport and metabolism].	0	0	339	678	1
223462	COG0385	YfeH	Predicted Na+-dependent transporter [General function prediction only].	0	0	339	678	1
223463	COG0386	BtuE	Glutathione peroxidase, house-cleaning role in reducing lipid peroxides [Defense mechanisms, Lipid transport and metabolism].	0	0	339	678	1
223465	COG0388	YafV	Predicted amidohydrolase [General function prediction only].	0	0	339	678	1
223469	COG0392	AglD2	Uncharacterized membrane protein YbhN, UPF0104 family [Function unknown].	0	0	339	678	1
223473	COG0396	SufC	Fe-S cluster assembly ATPase SufC [Posttranslational modification, protein turnover, chaperones].	0	0	339	678	1
223475	COG0398	TVP38	Uncharacterized membrane protein YdjX, TVP38/TMEM64 family, SNARE-associated domain [Function unknown].	0	0	339	678	1
223476	COG0399	WecE	dTDP-4-amino-4,6-dideoxygalactose transaminase [Cell wall/membrane/envelope biogenesis].	0	0	339	678	1
223477	COG0400	YpfH	Predicted esterase [General function prediction only].	0	0	339	678	1
223487	COG0410	LivF	ABC-type branched-chain amino acid transport system, ATPase component [Amino acid transport and metabolism].	0	0	339	678	1
223489	COG0412	DLH	Dienelactone hydrolase [Secondary metabolites biosynthesis, transport and catabolism].	0	0	339	678	1
223496	COG0419	SbcC	DNA repair exonuclease SbcCD ATPase subunit [Replication, recombination and repair].	0	0	339	678	1
223505	COG0428	ZupT	Zinc transporter ZupT [Inorganic ion transport and metabolism].	0	0	339	678	1
223516	COG0439	AccC	Biotin carboxylase [Lipid transport and metabolism].	0	0	339	678	1
223521	COG0444	DppD	ABC-type dipeptide/oligopeptide/nickel transport system, ATPase component [Amino acid transport and metabolism, Inorganic ion transport and metabolism].	0	0	339	678	1
223541	COG0465	HflB	ATP-dependent Zn proteases [Posttranslational modification, protein turnover, chaperones].	0	0	339	678	1
223550	COG0474	MgtA	Magnesium-transporting ATPase (P-type) [Inorganic ion transport and metabolism].	0	0	339	678	1
223556	COG0480	FusA	Translation elongation factor EF-G, a GTPase [Translation, ribosomal structure and biogenesis].	0	0	339	678	1
223559	COG0483	SuhB	Archaeal fructose-1,6-bisphosphatase or related enzyme of inositol monophosphatase family [Carbohydrate transport and metabolism].	0	0	339	678	1
223564	COG0490	KhtT	K+/H+ antiporter YhaU, regulatory subunit KhtT [Inorganic ion transport and metabolism].	0	0	339	678	1
223589	COG0515	SPS1	Serine/threonine protein kinase [Signal transduction mechanisms].	0	0	339	678	1
223600	COG0526	TrxA	Thiol-disulfide isomerase or thioredoxin [Posttranslational modification, protein turnover, chaperones].	0	0	339	678	1
223604	COG0530	ECM27	Ca2+/Na+ antiporter [Inorganic ion transport and metabolism].	0	0	339	678	1
223605	COG0531	PotE	Amino acid transporter [Amino acid transport and metabolism].	0	0	339	678	1
223645	COG0572	Udk	Uridine kinase [Nucleotide transport and metabolism].	0	0	339	678	1
223660	COG0587	DnaE	DNA polymerase III, alpha subunit [Replication, recombination and repair].	0	0	339	678	1
223661	COG0588	GpmA	Phosphoglycerate mutase (BPG-dependent) [Carbohydrate transport and metabolism].	0	0	339	678	1
223662	COG0589	UspA	Nucleotide-binding universal stress protein, UspA family [Signal transduction mechanisms].	0	0	339	678	1
223664	COG0591	PutP	Na+/proline symporter [Amino acid transport and metabolism].	0	0	339	678	1
223673	COG0600	TauC	ABC-type nitrate/sulfonate/bicarbonate transport system, permease component [Inorganic ion transport and metabolism].	0	0	339	678	1
223674	COG0601	DppB	ABC-type dipeptide/oligopeptide/nickel transport system, permease component [Amino acid transport and metabolism, Inorganic ion transport and metabolism].	0	0	339	678	1
223677	COG0604	Qor	NADPH:quinone reductase or related Zn-dependent oxidoreductase [Energy production and conversion, General function prediction only].	0	0	339	678	1
223679	COG0606	YifB	Predicted ATPase with chaperone activity [Posttranslational modification, protein turnover, chaperones].	0	0	339	678	1
223686	COG0613	YciV	Predicted metal-dependent phosphoesterase TrpH, contains PHP domain [General function prediction only].	0	0	339	678	1
223687	COG0614	FepB	ABC-type Fe3+-hydroxamate transport system, periplasmic component [Inorganic ion transport and metabolism].	0	0	339	678	1
223689	COG0616	SppA	Periplasmic serine protease, ClpP class [Posttranslational modification, protein turnover, chaperones].	0	0	339	678	1
223706	COG0633	Fdx	Ferredoxin [Energy production and conversion].	0	0	339	678	1
223707	COG0634	HptA	Hypoxanthine-guanine phosphoribosyltransferase [Nucleotide transport and metabolism].	0	0	339	678	1
223716	COG0643	CheA	Chemotaxis protein histidine kinase CheA [Cell motility, Signal transduction mechanisms].	0	0	339	678	1
223722	COG0649	NuoD	NADH:ubiquinone oxidoreductase 49 kD subunit (chain D) [Energy production and conversion].	0	0	339	678	1
223725	COG0652	PpiB	Peptidyl-prolyl cis-trans isomerase (rotamase) - cyclophilin family [Posttranslational modification, protein turnover, chaperones].	0	0	339	678	1
223728	COG0655	WrbA	Multimeric flavodoxin WrbA [Energy production and conversion].	0	0	339	678	1
223731	COG0658	ComEC	Predicted membrane metal-binding protein [General function prediction only].	0	0	339	678	1
223733	COG0661	AarF	Predicted unusual protein kinase regulating ubiquinone biosynthesis, AarF/ABC1/UbiB family [Coenzyme transport and metabolism, Signal transduction mechanisms].	0	0	339	678	1
223742	COG0670	YbhL	Integral membrane protein, interacts with FtsH [General function prediction only].	0	0	339	678	1
223751	COG0679	YfdV	Predicted permease [General function prediction only].	0	0	339	678	1
223753	COG0681	LepB	Signal peptidase I [Intracellular trafficking, secretion, and vesicular transport].	0	0	339	678	1
223755	COG0683	LivK	ABC-type branched-chain amino acid transport system, periplasmic component [Amino acid transport and metabolism].	0	0	339	678	1
223773	COG0701	YraQ	Uncharacterized membrane protein YraQ, UPF0718 family [Function unknown].	0	0	339	678	1
223787	COG0715	TauA	ABC-type nitrate/sulfonate/bicarbonate transport system, periplasmic component [Inorganic ion transport and metabolism].	0	0	339	678	1
223799	COG0727	YkgJ	Fe-S-cluster containining protein [General function prediction only].	0	0	339	678	1
223802	COG0730	YfcA	Uncharacterized membrane protein YfcA [Function unknown].	0	0	339	678	1
223807	COG0736	AcpS	Phosphopantetheinyl transferase (holo-ACP synthase) [Lipid transport and metabolism].	0	0	339	678	1
223808	COG0737	UshA	2',3'-cyclic-nucleotide 2'-phosphodiesterase/5'- or 3'-nucleotidase, 5'-nucleotidase family [Nucleotide transport and metabolism, Defense mechanisms].	0	0	339	678	1
223812	COG0741	MltE	Soluble lytic murein transglycosylase and related regulatory proteins (some contain LysM/invasin domains) [Cell wall/membrane/envelope biogenesis].	0	0	339	678	1
223815	COG0744	MrcB	Membrane carboxypeptidase (penicillin-binding protein) [Cell wall/membrane/envelope biogenesis].	0	0	339	678	1
223819	COG0748	HugZ	Putative heme iron utilization protein [Inorganic ion transport and metabolism].	0	0	339	678	1
223831	COG0760	SurA	Parvulin-like peptidyl-prolyl isomerase [Posttranslational modification, protein turnover, chaperones].	0	0	339	678	1
223836	COG0765	HisM	ABC-type amino acid transport system, permease component [Amino acid transport and metabolism].	0	0	339	678	1
223843	COG0772	FtsW	Bacterial cell division protein FtsW, lipid II flippase [Cell cycle control, cell division, chromosome partitioning].	0	0	339	678	1
223853	COG0782	GreA	Transcription elongation factor, GreA/GreB family [Transcription].	0	0	339	678	1
223854	COG0783	Dps	DNA-binding ferritin-like protein (oxidative damage protectant) [Inorganic ion transport and metabolism, Defense mechanisms].	0	0	339	678	1
223857	COG0786	GltS	Na+/glutamate symporter [Amino acid transport and metabolism].	0	0	339	678	1
223869	COG0798	ACR3	Arsenite efflux pump ArsB, ACR3 family [Inorganic ion transport and metabolism].	0	0	339	678	1
223896	COG0826	PrtC	Collagenase-like protease, PrtC family [Posttranslational modification, protein turnover, chaperones].	0	0	339	678	1
223897	COG0827	YtxK	Adenine-specific DNA methylase [Replication, recombination and repair].	0	0	339	678	1
223900	COG0830	UreF	Urease accessory protein UreF [Posttranslational modification, protein turnover, chaperones].	0	0	339	678	1
223904	COG0834	HisJ	ABC-type amino acid transport/signal transduction system, periplasmic component/domain [Amino acid transport and metabolism, Signal transduction mechanisms].	0	0	339	678	1
223905	COG0835	CheW	Chemotaxis signal transduction protein [Cell motility, Signal transduction mechanisms].	0	0	339	678	1
223917	COG0848	ExbD	Biopolymer transport protein ExbD [Intracellular trafficking, secretion, and vesicular transport].	0	0	339	678	1
223928	COG0859	RfaF	ADP-heptose:LPS heptosyltransferase [Cell wall/membrane/envelope biogenesis].	0	0	339	678	1
223929	COG0860	AmiC	N-acetylmuramoyl-L-alanine amidase [Cell wall/membrane/envelope biogenesis].	0	0	339	678	1
223931	COG0863	YhdJ	DNA modification methylase [Replication, recombination and repair].	0	0	339	678	1
223944	COG1012	AdhE	Acyl-CoA reductase or other NAD-dependent aldehyde dehydrogenase [Energy production and conversion].	0	0	339	678	1
223949	COG1018	Fpr	Ferredoxin-NADP reductase [Energy production and conversion].	0	0	339	678	1
223951	COG1020	EntF	Non-ribosomal peptide synthetase component F [Secondary metabolites biosynthesis, transport and catabolism].	0	0	339	678	1
223955	COG1024	CaiD	Enoyl-CoA hydratase/carnithine racemase [Lipid transport and metabolism].	0	0	339	678	1
223996	COG1070	XylB	Sugar (pentulose or hexulose) kinase [Carbohydrate transport and metabolism].	0	0	339	678	1
223997	COG1071	AcoA	TPP-dependent pyruvate or acetoin dehydrogenase subunit alpha [Energy production and conversion].	0	0	339	678	1
224026	COG1101	PhnK	ABC-type uncharacterized transport system, ATPase component [General function prediction only].	0	0	339	678	1
224038	COG1113	AnsP	L-asparagine transporter and related permeases [Amino acid transport and metabolism].	0	0	339	678	1
224040	COG1115	AlsT	Na+/alanine symporter [Amino acid transport and metabolism].	0	0	339	678	1
224041	COG1116	TauB	ABC-type nitrate/sulfonate/bicarbonate transport system, ATPase component [Inorganic ion transport and metabolism].	0	0	339	678	1
224043	COG1118	CysA	ABC-type sulfate/molybdate transport systems, ATPase component [Inorganic ion transport and metabolism].	0	0	339	678	1
[truncated: 4,927 more rows]

## Sheet: Description
Column	Description
PSSM-Id	Unique numerical identifier			Contingency table
CD Accession	CD accession, starting with 'cd', 'pfam', 'smart', 'COG', 'PRK' or 'CHL'
CD Short Name	CD short name				Tanfor	Non-Tanfor
Description	CD description			Domain in Neighborhood	A	B
A	# occurrences of domain within Tanfor-Neighborhoods			No-domain in Neighborhood	C	D
B	# occurrences of domain within Non-Tanfor-Neighborhoods
C	# lack of occurrences of domain within Tanfor-Neighborhoods
D	# lack of occurrences of Domain within Non-Tanfor-Neighborhoods
P-Value	P value calcualted based on one-tailed Fisher's Exact Test
